# Supplementary material for: Nucleoside bearing boron clusters and their phosphoramidites – building blocks for modified oligonucleotide synthesis
Source: Royal Society of Chemistry journal article supplement (doi:10.1039/c4nj01096e), 2014-11-19
Supplement: c4nj01096e1.pdf [file c4nj01096e1.pdf]

Electronic Supplementary Information  
New Journal of Chemistry

Nucleoside bearing boron clusters and their phosphoramidites – building blocks for  
modified oligonucleotide synthesis

Michał Matuszewski,<sup>a</sup> Agnieszka Kiliszek,<sup>b</sup> Wojciech Rypniewski,<sup>b</sup> Zbigniew J.  
Lesnikowski<sup>c</sup> and Agnieszka B. Olejniczak<sup>\*c</sup>

<sup>a</sup> Institute of Organic Chemistry, Lodz University of Technology, 116 Zeromskiego St.,  
90-924 Lodz, Poland.

<sup>b</sup> Institute of Bioorganic Chemistry PAS, 12/14 Noskowskiego St., 61-704 Poznan, Poland.

<sup>c</sup> Institute of Medical Biology PAS, 106 Lodowa St., 92-232 Lodz, Poland.

E-mail: aolejniczak@cbm.pan.pl

<sup>1</sup>H-, <sup>13</sup>C-, <sup>11</sup>B-, <sup>11</sup>B{H BB}-, <sup>31</sup>P-NMR, DEPT-135, IR, MS spectra of 1,2-dicarba-*closo*-  
dodecaborane derivatives of thymidine: **20**, **21**, **29**, 2'-deoxycytidine: **22**, **23**, **30**, 2'-  
deoxyadenosine: **12-14**, **24**, **25**, **31**, 2'-deoxyguanosine: **16**, **17**, **26-28**, **32**, and conjugates  
with opened-cage 7,8-dicarba-*nido*-undecaborate ion **33-36**. CD spectra for **20**, **22**, **24**, **27**,  
**MALDI-TOF** spectra for **38-41**.

*Thymidine derivatives*

|                                                                       |    |
|-----------------------------------------------------------------------|----|
| Figure S1. <sup>1</sup> H NMR spectrum of compound <b>20</b>          | 5  |
| Figure S2. <sup>13</sup> C NMR spectrum of compound <b>20</b>         | 6  |
| Figure S3. DEPT-135 spectrum of compound <b>20</b>                    | 7  |
| Figure S4. <sup>11</sup> B {H} NMR spectrum of compound <b>20</b>     | 8  |
| Figure S5. <sup>11</sup> B NMR spectrum of compound <b>20</b>         | 9  |
| Figure S6. IR spectrum of compound <b>20</b>                          | 10 |
| Figure S7. MS-FAB spectra of compound <b>20</b>                       | 11 |
| Figure S8. <sup>1</sup> H NMR spectrum of compound <b>21</b>          | 12 |
| Figure S9. <sup>13</sup> C NMR spectrum of compound <b>21</b>         | 13 |
| Figure S10. DEPT-135 spectrum of compound <b>21</b>                   | 14 |
| Figure S11. <sup>11</sup> B {H BB} NMR spectrum of compound <b>21</b> | 15 |
| Figure S12. <sup>11</sup> B NMR spectrum of compound <b>21</b>        | 16 |
| Figure S13. IR spectrum of compound <b>21</b>                         | 17 |
| Figure S14. MS-FAB spectra of compound <b>21</b>                      | 18 |
| Figure S15. <sup>1</sup> H NMR spectrum of compound <b>29</b>         | 19 |
| Figure S16. <sup>13</sup> C NMR spectrum of compound <b>29</b>        | 20 |
| Figure S17. DEPT-135 spectrum of compound <b>29</b>                   | 21 |
| Figure S18. <sup>11</sup> B {H BB} NMR spectrum of compound <b>29</b> | 22 |
| Figure S19. <sup>11</sup> B NMR spectrum of compound <b>29</b>        | 23 |
| Figure S20. <sup>31</sup> P NMR spectrum of compound <b>29</b>        | 24 |
| Figure S21. IR spectrum of compound <b>29</b>                         | 25 |
| Figure S22. MS-FAB spectra of compound <b>29</b>                      | 26 |

### *2'-Deoxycytidine derivatives*

|                                                                       |    |
|-----------------------------------------------------------------------|----|
| Figure S23. <sup>1</sup> H NMR spectrum of compound <b>22</b>         | 27 |
| Figure S24. <sup>13</sup> C NMR spectrum of compound <b>22</b>        | 28 |
| Figure S25. DEPT-135 spectrum of compound <b>22</b>                   | 29 |
| Figure S26. <sup>11</sup> B {H BB} NMR spectrum of compound <b>22</b> | 30 |
| Figure S27. <sup>11</sup> B NMR spectrum of compound <b>22</b>        | 31 |
| Figure S28. IR spectrum of compound <b>22</b>                         | 31 |
| Figure S29. MS-FAB spectra of compound <b>22</b>                      | 33 |

|                                                                       |    |
|-----------------------------------------------------------------------|----|
| Figure S30. <sup>1</sup> H NMR spectrum of compound <b>23</b>         | 34 |
| Figure S31. <sup>13</sup> C NMR spectrum of compound <b>23</b>        | 35 |
| Figure S32. DEPT-135 spectrum of compound <b>23</b>                   | 36 |
| Figure S33. <sup>11</sup> B {H BB} NMR spectrum of compound <b>23</b> | 37 |
| Figure S34. <sup>11</sup> B NMR spectrum of compound <b>23</b>        | 38 |
| Figure S35. IR spectrum of compound <b>23</b>                         | 39 |
| Figure S36. MS-FAB spectra of compound <b>23</b>                      | 40 |

|                                                                       |    |
|-----------------------------------------------------------------------|----|
| Figure S37. <sup>1</sup> H NMR spectrum of compound <b>30</b>         | 41 |
| Figure S38. <sup>13</sup> C NMR spectrum of compound <b>30</b>        | 42 |
| Figure S39. DEPT-135 spectrum of compound <b>30</b>                   | 43 |
| Figure S40. <sup>11</sup> B {H BB} NMR spectrum of compound <b>30</b> | 44 |
| Figure S41. <sup>11</sup> B NMR spectrum of compound <b>30</b>        | 45 |
| Figure S42. <sup>31</sup> P NMR spectrum of compound <b>30</b>        | 46 |
| Figure S43. IR spectrum of compound <b>30</b>                         | 47 |
| Figure S44. MS-FAB spectrum of compound <b>30</b>                     | 48 |

### *2'-Deoxyadenosine derivatives*

|                                                               |    |
|---------------------------------------------------------------|----|
| Figure S45. <sup>1</sup> H NMR spectrum of compound <b>12</b> | 49 |
|---------------------------------------------------------------|----|

|                                                               |    |
|---------------------------------------------------------------|----|
| Figure S46. <sup>1</sup> H NMR spectrum of compound <b>13</b> | 50 |
|---------------------------------------------------------------|----|

|                                                               |    |
|---------------------------------------------------------------|----|
| Figure S47. <sup>1</sup> H NMR spectrum of compound <b>14</b> | 51 |
|---------------------------------------------------------------|----|

|                                                                |    |
|----------------------------------------------------------------|----|
| Figure S48. <sup>13</sup> C NMR spectrum of compound <b>14</b> | 52 |
|----------------------------------------------------------------|----|

|                                                     |    |
|-----------------------------------------------------|----|
| Figure S49. DEPT-135 spectrum of compound <b>14</b> | 53 |
|-----------------------------------------------------|----|

|                                               |    |
|-----------------------------------------------|----|
| Figure S50. IR spectrum of compound <b>14</b> | 54 |
|-----------------------------------------------|----|

|                                                  |    |
|--------------------------------------------------|----|
| Figure S51. MS-FAB spectra of compound <b>14</b> | 55 |
|--------------------------------------------------|----|

|                                                               |    |
|---------------------------------------------------------------|----|
| Figure S52. <sup>1</sup> H NMR spectrum of compound <b>24</b> | 56 |
|---------------------------------------------------------------|----|

|                                                                |    |
|----------------------------------------------------------------|----|
| Figure S53. <sup>13</sup> C NMR spectrum of compound <b>24</b> | 57 |
|----------------------------------------------------------------|----|

|                                                     |    |
|-----------------------------------------------------|----|
| Figure S54. DEPT-135 spectrum of compound <b>24</b> | 58 |
|-----------------------------------------------------|----|

|                                                                                     |    |
|-------------------------------------------------------------------------------------|----|
| Figure S55. <sup>11</sup> B { <sup>1</sup> H BB} NMR spectrum of compound <b>24</b> | 59 |
|-------------------------------------------------------------------------------------|----|

|                                                                |    |
|----------------------------------------------------------------|----|
| Figure S56. <sup>11</sup> B NMR spectrum of compound <b>24</b> | 60 |
|----------------------------------------------------------------|----|

|                                               |    |
|-----------------------------------------------|----|
| Figure S57. IR spectrum of compound <b>24</b> | 61 |
|-----------------------------------------------|----|

|                                                  |    |
|--------------------------------------------------|----|
| Figure S58. MS-FAB spectra of compound <b>24</b> | 62 |
|--------------------------------------------------|----|

|                                                               |    |
|---------------------------------------------------------------|----|
| Figure S59. <sup>1</sup> H NMR spectrum of compound <b>25</b> | 63 |
|---------------------------------------------------------------|----|

|                                                                |    |
|----------------------------------------------------------------|----|
| Figure S60. <sup>13</sup> C NMR spectrum of compound <b>25</b> | 64 |
|----------------------------------------------------------------|----|

|                                                                                 |    |
|---------------------------------------------------------------------------------|----|
| Figure S61. DEPT-135 spectrum of compound <b>25</b>                             | 65 |
| Figure S62. $^{11}\text{B}\{^1\text{H BB}\}$ NMR spectrum of compound <b>25</b> | 66 |
| Figure S63. $^{11}\text{B}$ NMR spectrum of compound <b>25</b>                  | 67 |
| Figure S64. IR spectrum of compound <b>25</b>                                   | 68 |
| Figure S65. MS spectra of compound <b>25</b>                                    | 69 |

|                                                                                 |    |
|---------------------------------------------------------------------------------|----|
| Figure S66. $^1\text{H}$ NMR spectrum of compound <b>31</b>                     | 70 |
| Figure S67. $^{13}\text{C}$ NMR spectrum of compound <b>31</b>                  | 71 |
| Figure S68. DEPT-135 spectrum of compound <b>31</b>                             | 72 |
| Figure S69. $^{11}\text{B}\{^1\text{H BB}\}$ NMR spectrum of compound <b>31</b> | 73 |
| Figure S70. $^{11}\text{B}$ NMR spectrum of compound <b>31</b>                  | 74 |
| Figure S71. $^{31}\text{P}$ NMR spectrum of compound <b>31</b>                  | 75 |
| Figure S72. IR spectrum of compound <b>31</b>                                   | 76 |
| Figure S73. MS-FAB spectra of compound <b>31</b>                                | 77 |

### *2'-Deoxyguanosine derivatives*

|                                                                |    |
|----------------------------------------------------------------|----|
| Figure S74. $^1\text{H}$ NMR spectrum of compound <b>16</b>    | 78 |
| Figure S75. $^{13}\text{C}$ NMR spectrum of compound <b>16</b> | 79 |
| Figure S76. DEPT-135 spectrum of compound <b>16</b>            | 80 |
| Figure S77. IR spectrum of compound <b>16</b>                  | 81 |
| Figure S78. MS-FAB spectra of compound <b>16</b>               | 82 |

|                                                             |    |
|-------------------------------------------------------------|----|
| Figure S79. $^1\text{H}$ NMR spectrum of compound <b>17</b> | 83 |
|-------------------------------------------------------------|----|

|                                                                                 |    |
|---------------------------------------------------------------------------------|----|
| Figure S80. $^1\text{H}$ NMR spectrum of compound <b>26</b>                     | 84 |
| Figure S81. $^{13}\text{C}$ NMR spectrum of compound <b>26</b>                  | 85 |
| Figure S82. DEPT-135 spectrum of compound <b>26</b>                             | 86 |
| Figure S83. $^{11}\text{B}\{^1\text{H BB}\}$ NMR spectrum of compound <b>26</b> | 87 |
| Figure S84. $^{11}\text{B}$ NMR spectrum of compound <b>26</b>                  | 88 |
| Figure S85. IR spectrum of compound <b>26</b>                                   | 89 |
| Figure S86. MS-FAB spectra of compound <b>26</b>                                | 90 |

|                                                                                 |    |
|---------------------------------------------------------------------------------|----|
| Figure S87. $^1\text{H}$ NMR spectrum of compound <b>27</b>                     | 91 |
| Figure S88. $^{13}\text{C}$ NMR spectrum of compound <b>27</b>                  | 92 |
| Figure S89. DEPT-135 spectrum of compound <b>27</b>                             | 93 |
| Figure S90. $^{11}\text{B}\{^1\text{H BB}\}$ NMR spectrum of compound <b>27</b> | 94 |
| Figure S91. $^{11}\text{B}$ NMR spectrum of compound <b>27</b>                  | 95 |
| Figure S92. IR spectrum of compound <b>27</b>                                   | 96 |
| Figure S93. MS-FAB spectra of compound <b>27</b>                                | 97 |

|                                                                                 |     |
|---------------------------------------------------------------------------------|-----|
| Figure S94. $^1\text{H}$ NMR spectrum of compound <b>28</b>                     | 98  |
| Figure S95. $^{13}\text{C}$ NMR spectrum of compound <b>28</b>                  | 99  |
| Figure S96. DEPT-135 spectrum of compound <b>28</b>                             | 100 |
| Figure S97. $^{11}\text{B}\{^1\text{H BB}\}$ NMR spectrum of compound <b>28</b> | 101 |
| Figure S98. $^{11}\text{B}$ NMR spectrum of compound <b>28</b>                  | 102 |
| Figure S99. IR spectrum of compound <b>28</b>                                   | 103 |
| Figure S100. MS-FAB spectra of compound <b>28</b>                               | 104 |

|                                                                                     |     |
|-------------------------------------------------------------------------------------|-----|
| Figure S101. <sup>1</sup> H NMR spectrum of compound <b>32</b>                      | 105 |
| Figure S102. <sup>13</sup> C NMR spectrum of compound <b>32</b>                     | 106 |
| Figure S103. DEPT-135 spectrum of compound <b>32</b>                                | 107 |
| Figure S104. <sup>11</sup> B{ <sup>1</sup> H BB} NMR spectrum of compound <b>32</b> | 108 |
| Figure S105. <sup>11</sup> B NMR spectrum of compound <b>32</b>                     | 109 |
| Figure S106. <sup>31</sup> P NMR spectrum of compound <b>32</b>                     | 110 |
| Figure S107. IR spectrum of compound <b>32</b>                                      | 111 |
| Figure S108. MS-FAB spectra of compound <b>32</b>                                   | 112 |

*Conjugates with opened-cage nido form*

|                                                                |     |
|----------------------------------------------------------------|-----|
| Figure S109. <sup>1</sup> H NMR spectrum of compound <b>33</b> | 113 |
| Figure S110. MS-FAB spectrum of compound <b>33</b>             | 114 |
| Figure S111. <sup>1</sup> H NMR spectrum of compound <b>34</b> | 115 |
| Figure S112. MS-FAB spectrum of compound <b>34</b>             | 116 |
| Figure S113. <sup>1</sup> H NMR spectrum of compound <b>35</b> | 117 |
| Figure S114. MS-FAB spectrum of compound <b>35</b>             | 118 |
| Figure S115. MS-FAB spectrum of compound <b>36</b>             | 119 |

*CD spectra*

|                                                                      |     |
|----------------------------------------------------------------------|-----|
| Figure S116. CD spectra of compounds <b>20</b> and thymidine         | 120 |
| Figure S117. CD spectra of compounds <b>22</b> and 2'-deoxycytidine  | 121 |
| Figure S118. CD spectra of compounds <b>24</b> and 2'-deoxyadenosine | 122 |
| Figure S119. CD spectra of compounds <b>27</b> and 2'-deoxyguanosine | 123 |

*MALDI-TOF spectra*

|                                                              |     |
|--------------------------------------------------------------|-----|
| Figure S120. MALDI-TOF spectrum of oligonucleotide <b>38</b> | 124 |
| Figure S121. MALDI-TOF spectrum of oligonucleotide <b>39</b> | 125 |
| Figure S122. MALDI-TOF spectrum of oligonucleotide <b>40</b> | 126 |
| Figure S123. MALDI-TOF spectrum of oligonucleotide <b>41</b> | 127 |

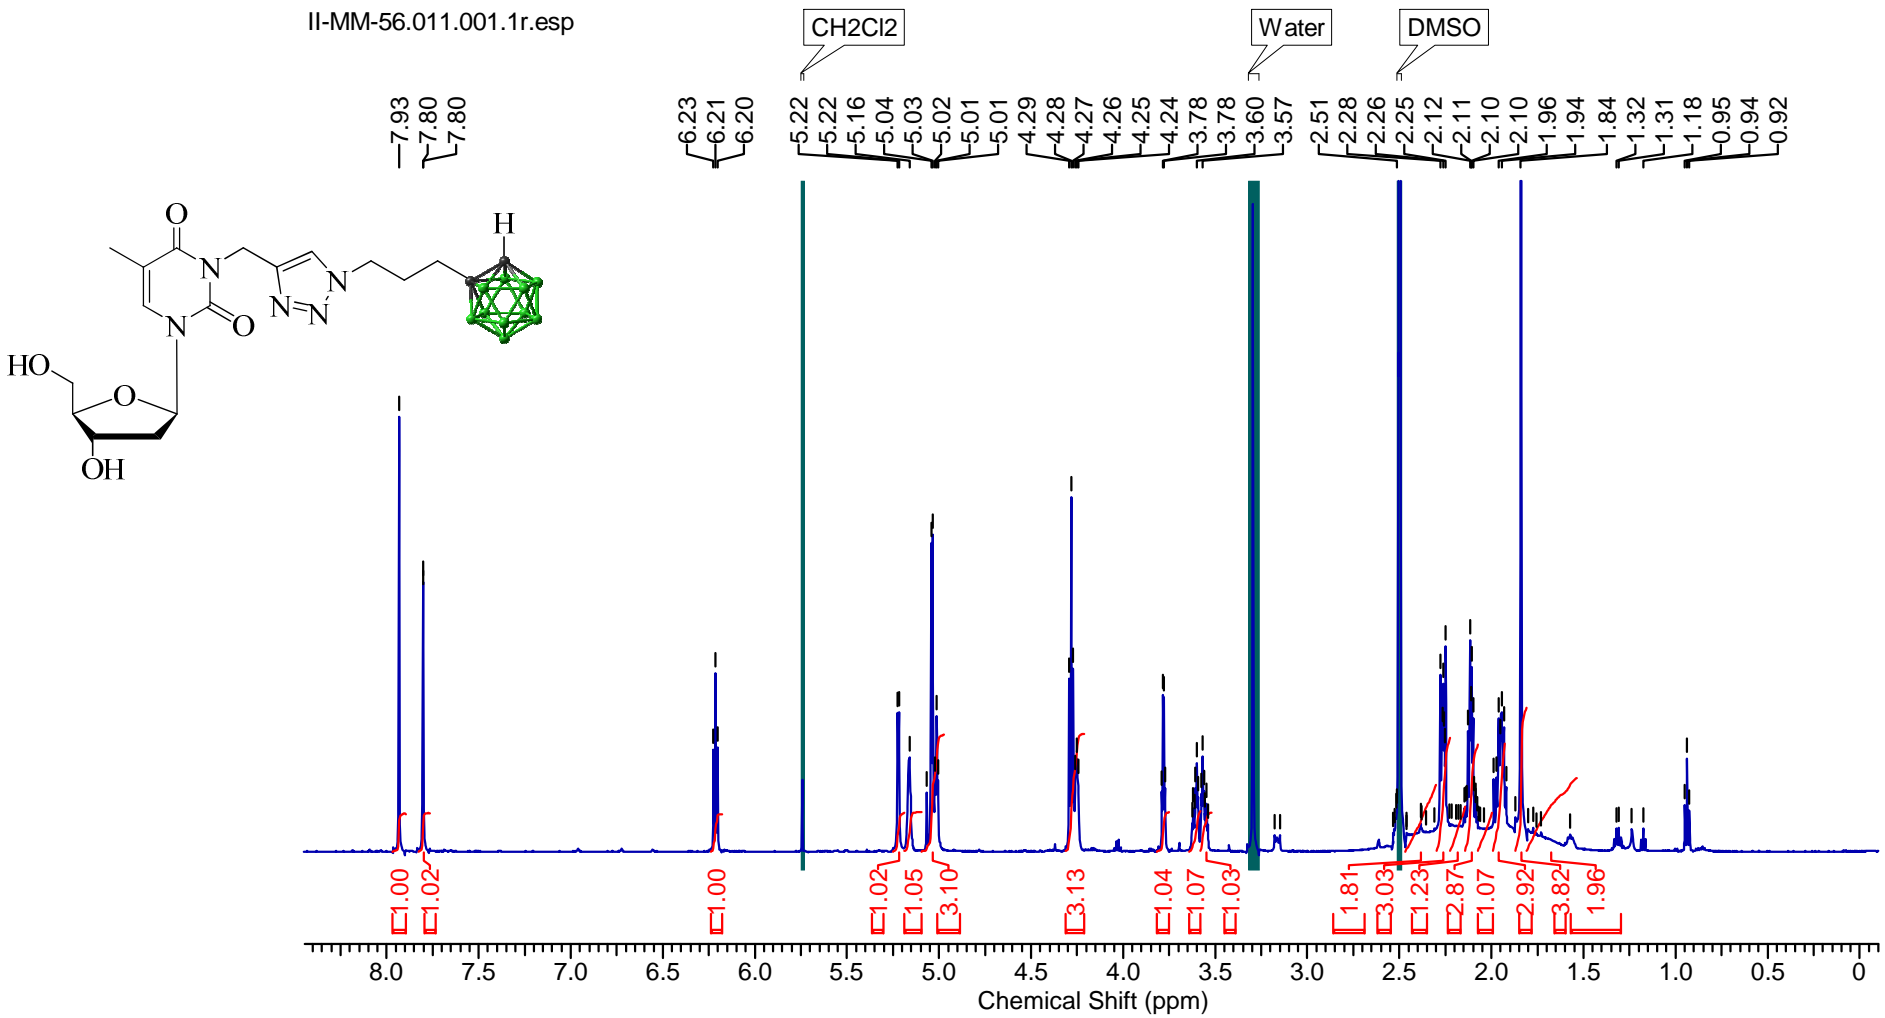

Figure S1.  $^1\text{H}$  NMR spectrum of conjugate 20.

II-MM-56.013.001.1r.esp

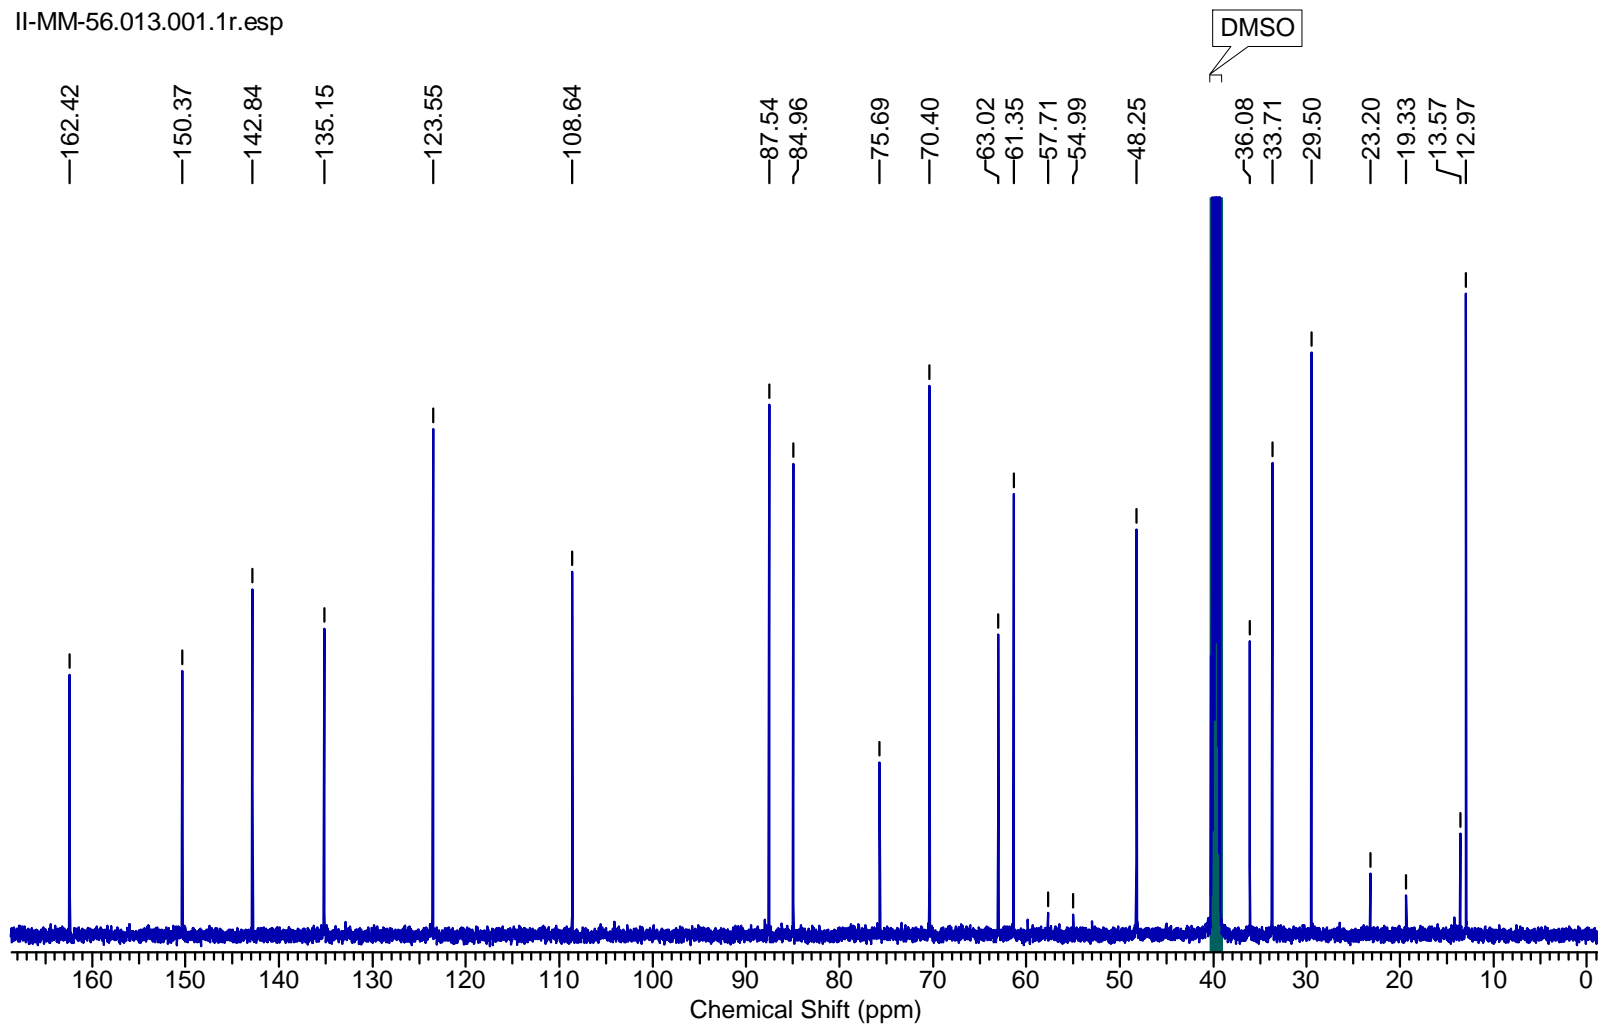

**Figure S2.**  $^{13}\text{C}$  NMR spectrum of conjugate **20**.

II-MM-56.010.001.1r.esp

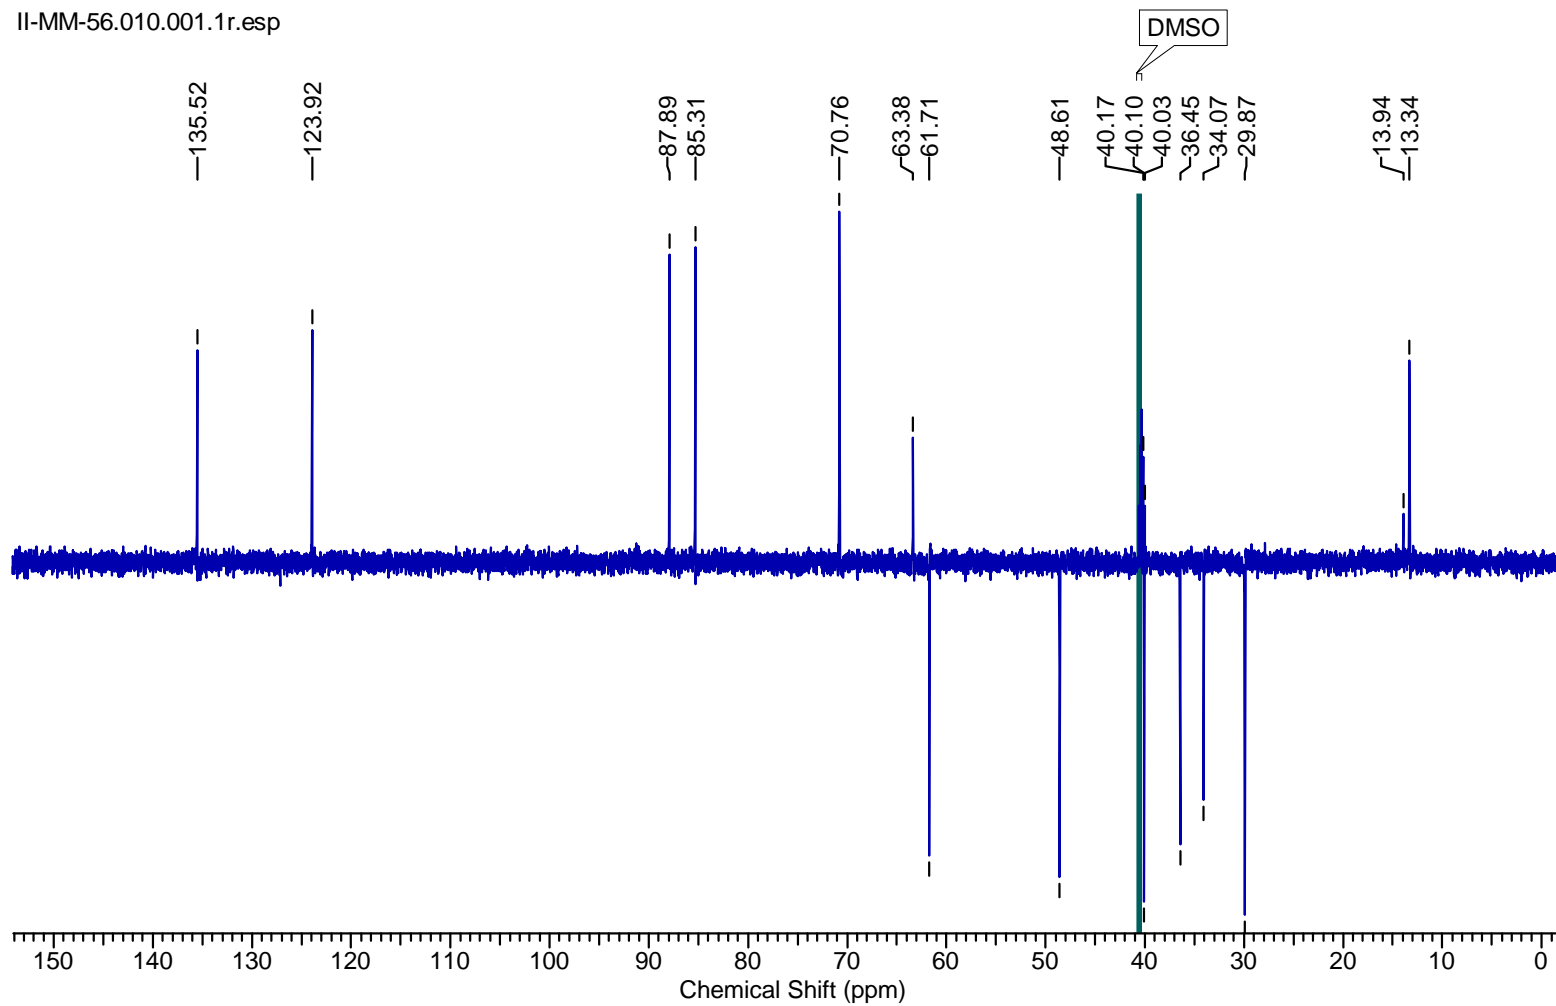

*Figure S3.* DEPT-135 spectrum of conjugate **20**.

II-MM-56.004.001.1r.esp

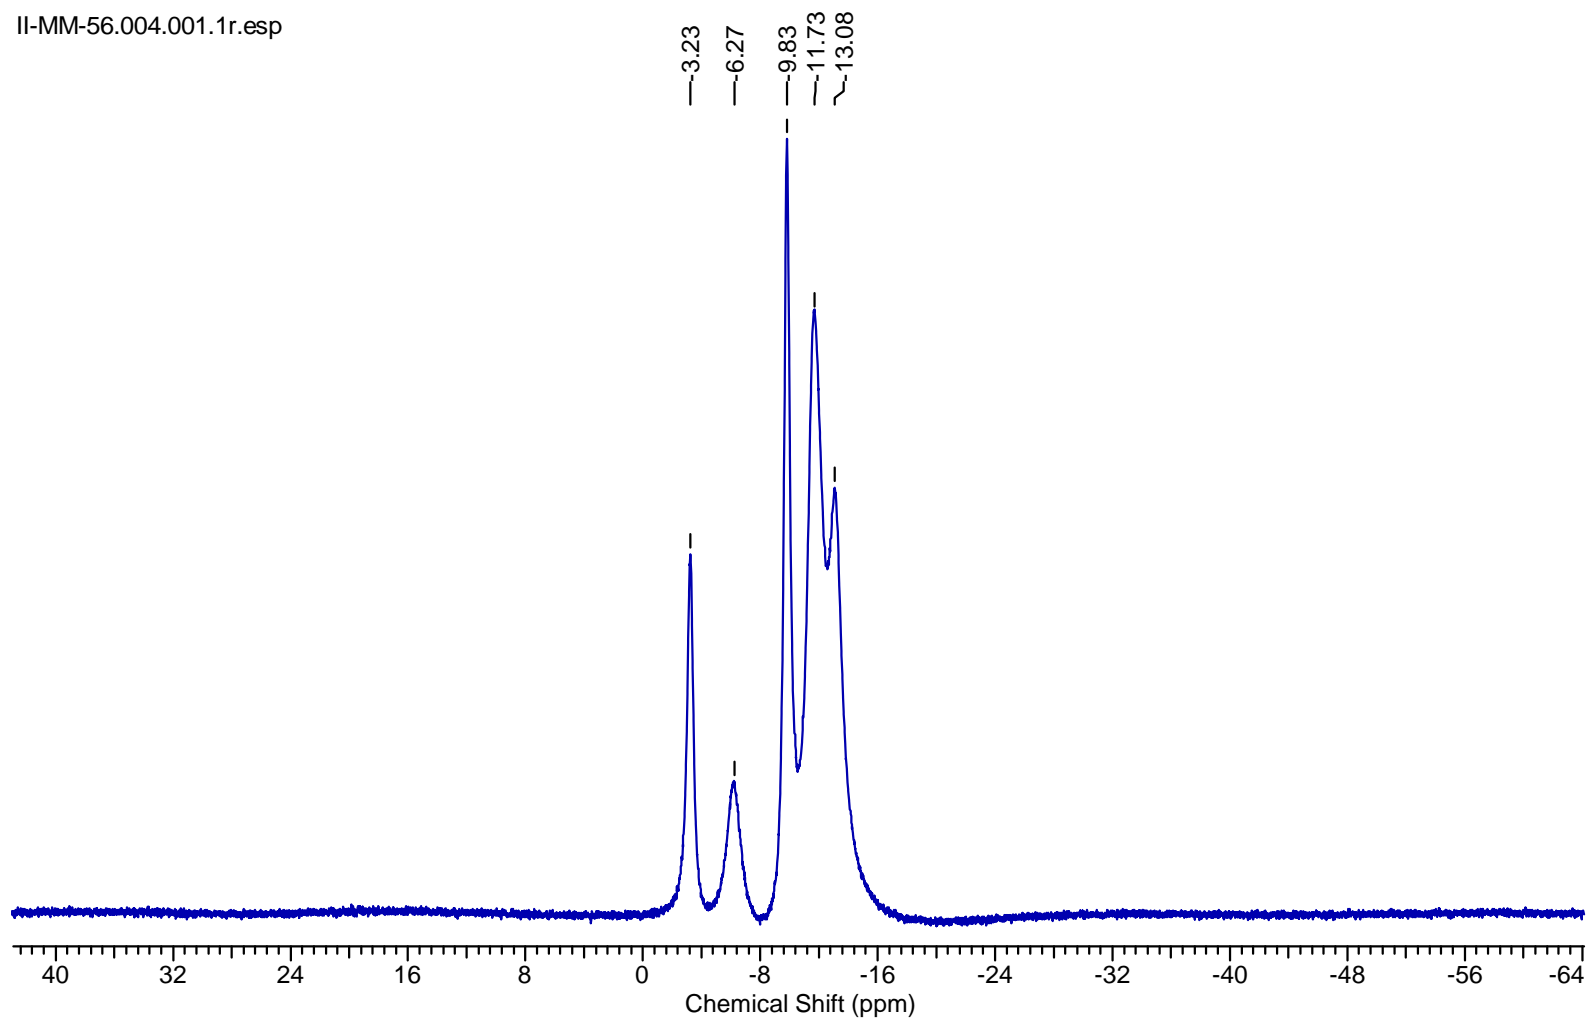

*Figure S4.*  $^{11}\text{B}$  {H BB} NMR spectrum of compound **20**.



II-MM-56.005.001.1r.esp

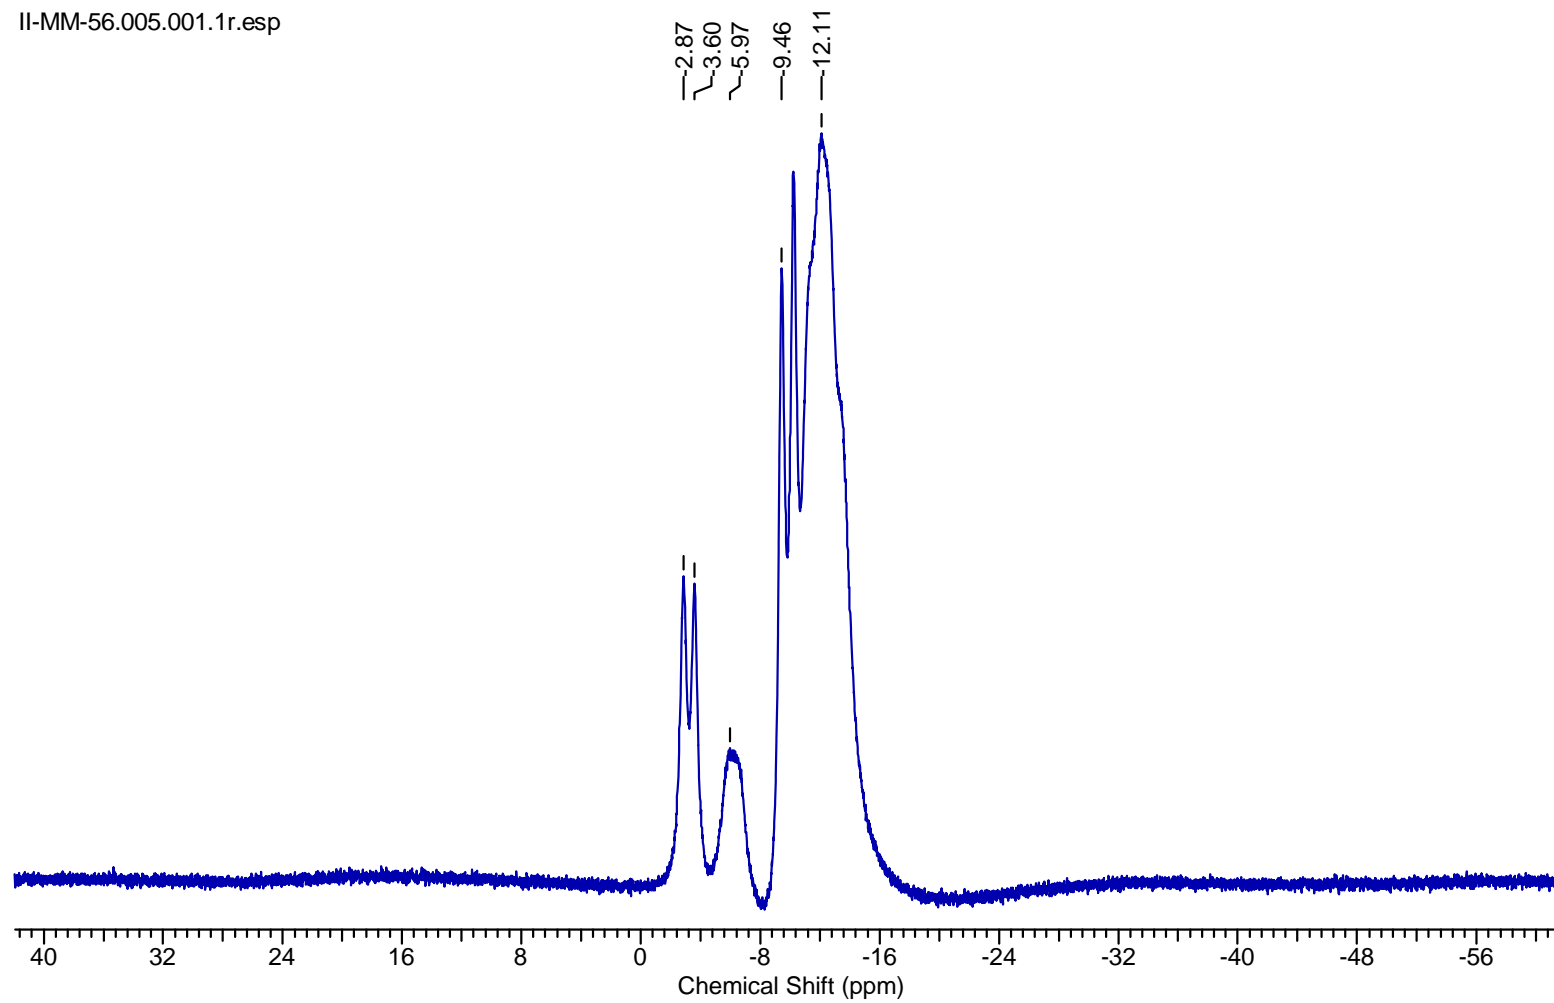

*Figure S5.*  $^{11}\text{B}$  NMR spectrum of compound **20**.

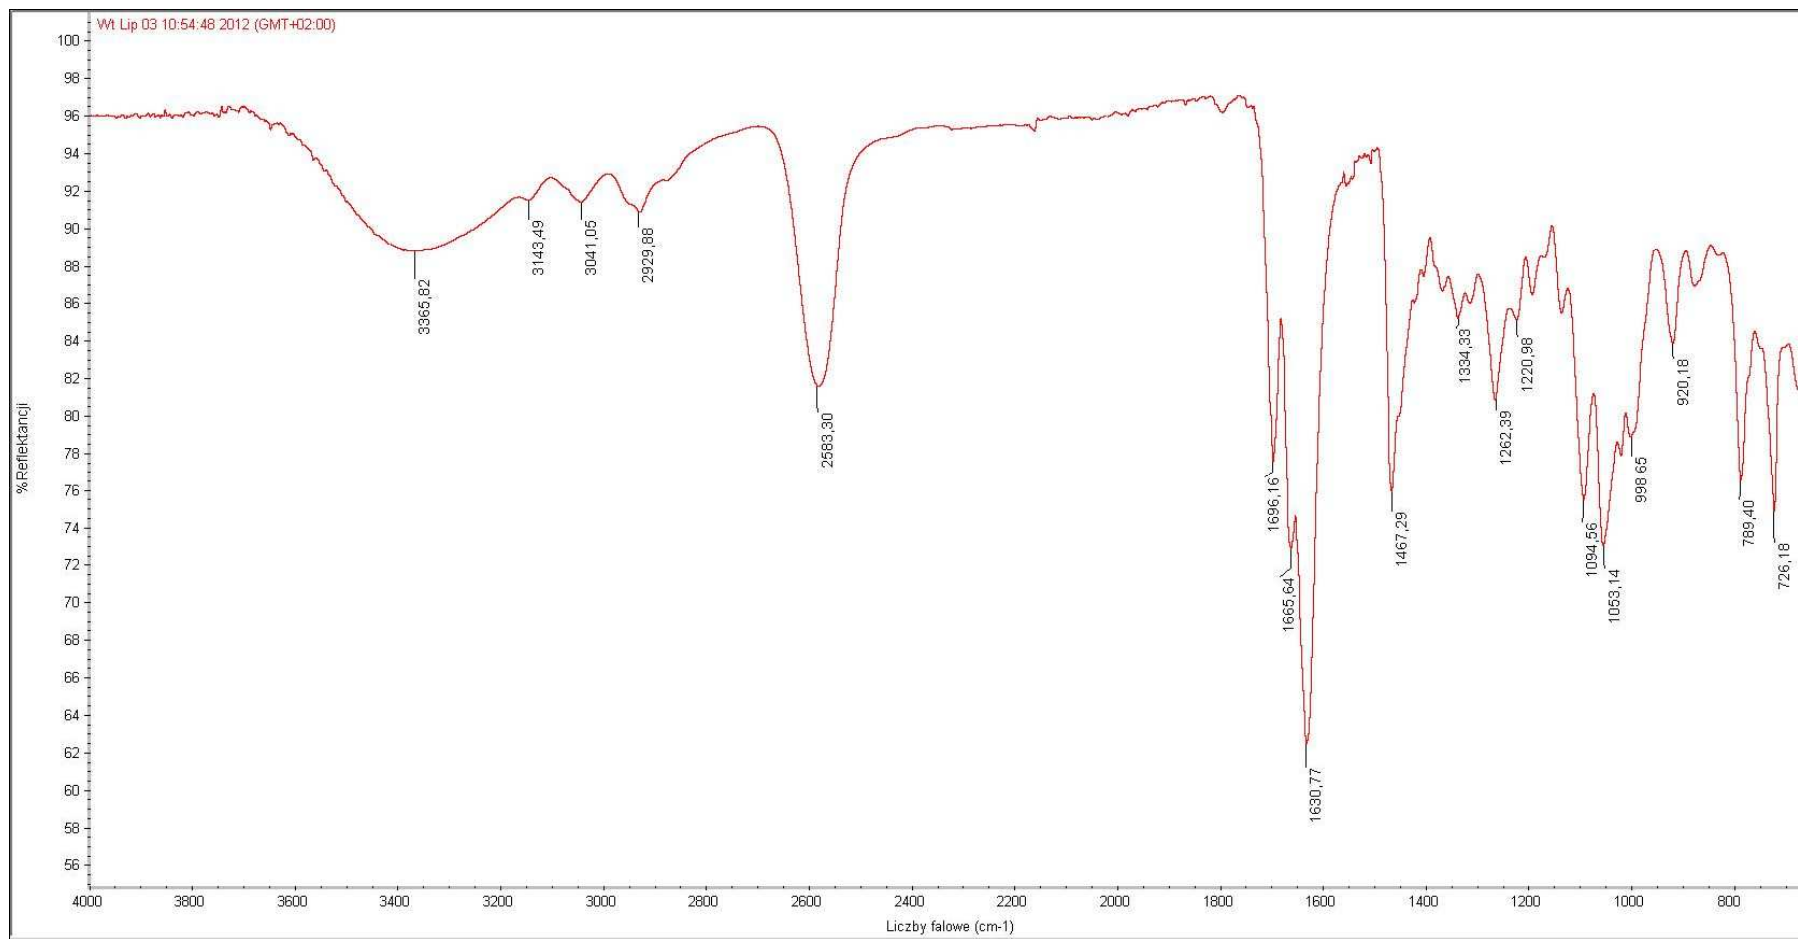

**Figure S6.** IR spectrum of compound **20**.

SPEC: ax275ibm a                    04-Apr-12    REG : 00:16.4    #9  
 Samp: II-MM-56                    Start : 12:44:40    10  
 Comm: LSI, Cs+ 13 keV, gly  
 Mode: FAB +VE +LMR BSCAN (EXP) UP LR NRM    Study : MS CBMIM PAN Lodz  
 Oper: es                    Client: IBM A.Olejniczak    Inlet :  
 Base: 242.3                    Inten : 16414624    Masses: 100 > 1000  
 Norm: 242.3                    RIC : 45864128    #peaks: 856  
 Peak: 1000.00 mmu  
 Data: +1>10

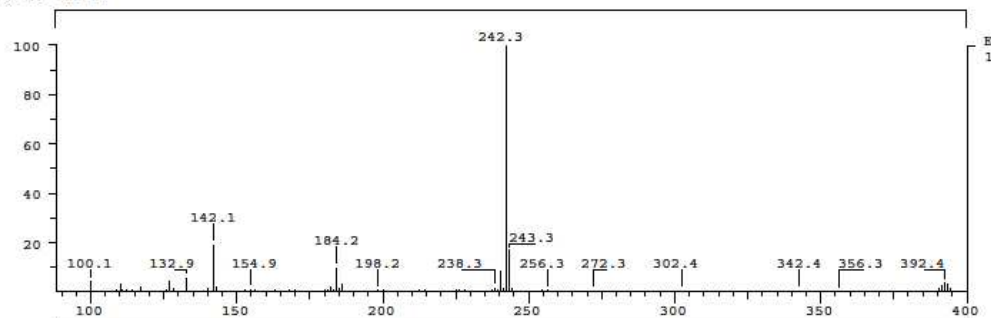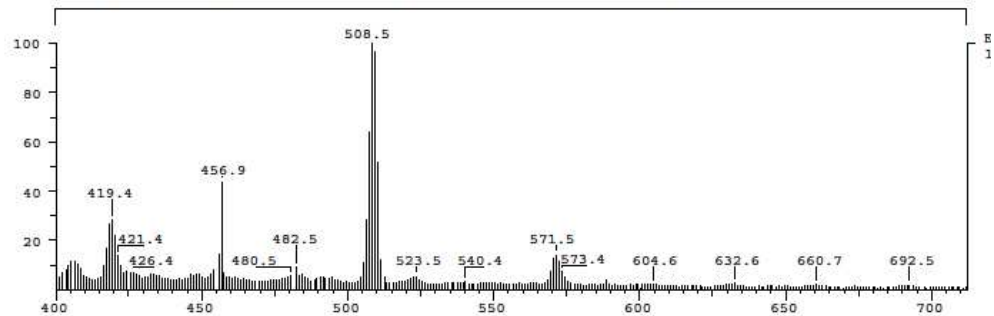

SPEC: ax275ibm                    04-Apr-12    REG : 00:16.3    #9  
 Samp: II-MM-56                    Start : 12:41:51    10  
 Comm: LSI, Cs+ 13 keV, gly  
 Mode: FAB -VE -LMR BSCAN (EXP) UP LR NRM    Study : MS CBMIM PAN Lodz  
 Oper: es                    Client: IBM A.Olejniczak    Inlet :  
 Base: 507.5                    Inten : 229403    Masses: 100 > 1000  
 Norm: 507.5                    RIC : 4362206    #peaks: 879  
 Peak: 1000.00 mmu  
 Data: +1>10

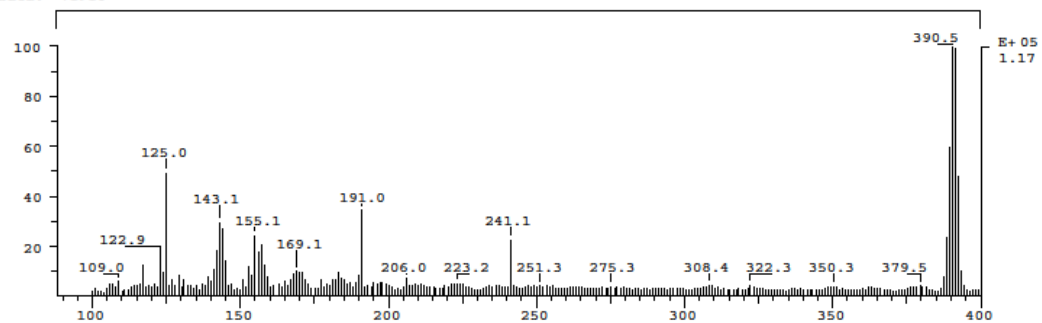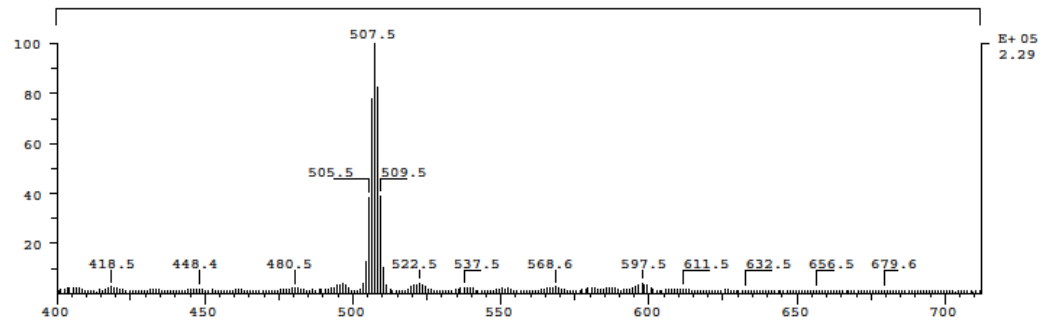

Figure S7. MS-FAB spectra of compound 20.

III-MM-43.010.001.1r.esp

Water

DMSO

7.94  
7.59  
7.59  
7.39  
7.38  
7.31  
7.29  
7.26  
7.25  
6.90  
6.90  
6.88  
6.88  
6.27  
6.26  
6.25  
5.74  
5.32  
5.31  
5.15  
5.05  
5.04  
4.34  
4.34  
4.33  
4.29  
4.28  
4.27  
3.91  
3.91  
3.74  
3.23  
3.22  
3.21  
3.21  
2.28  
2.27  
2.26  
2.26  
2.25  
2.25  
1.96  
1.95  
1.95  
1.93  
1.50  
1.50

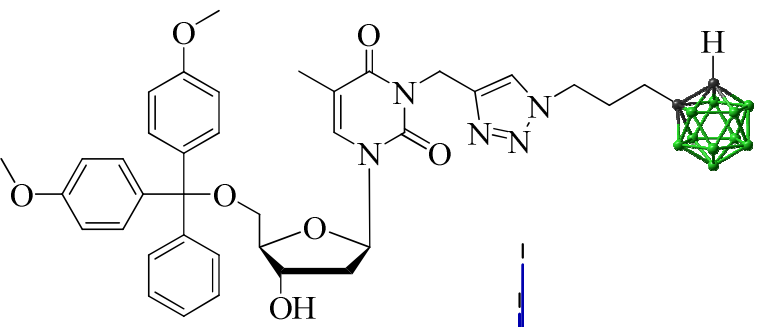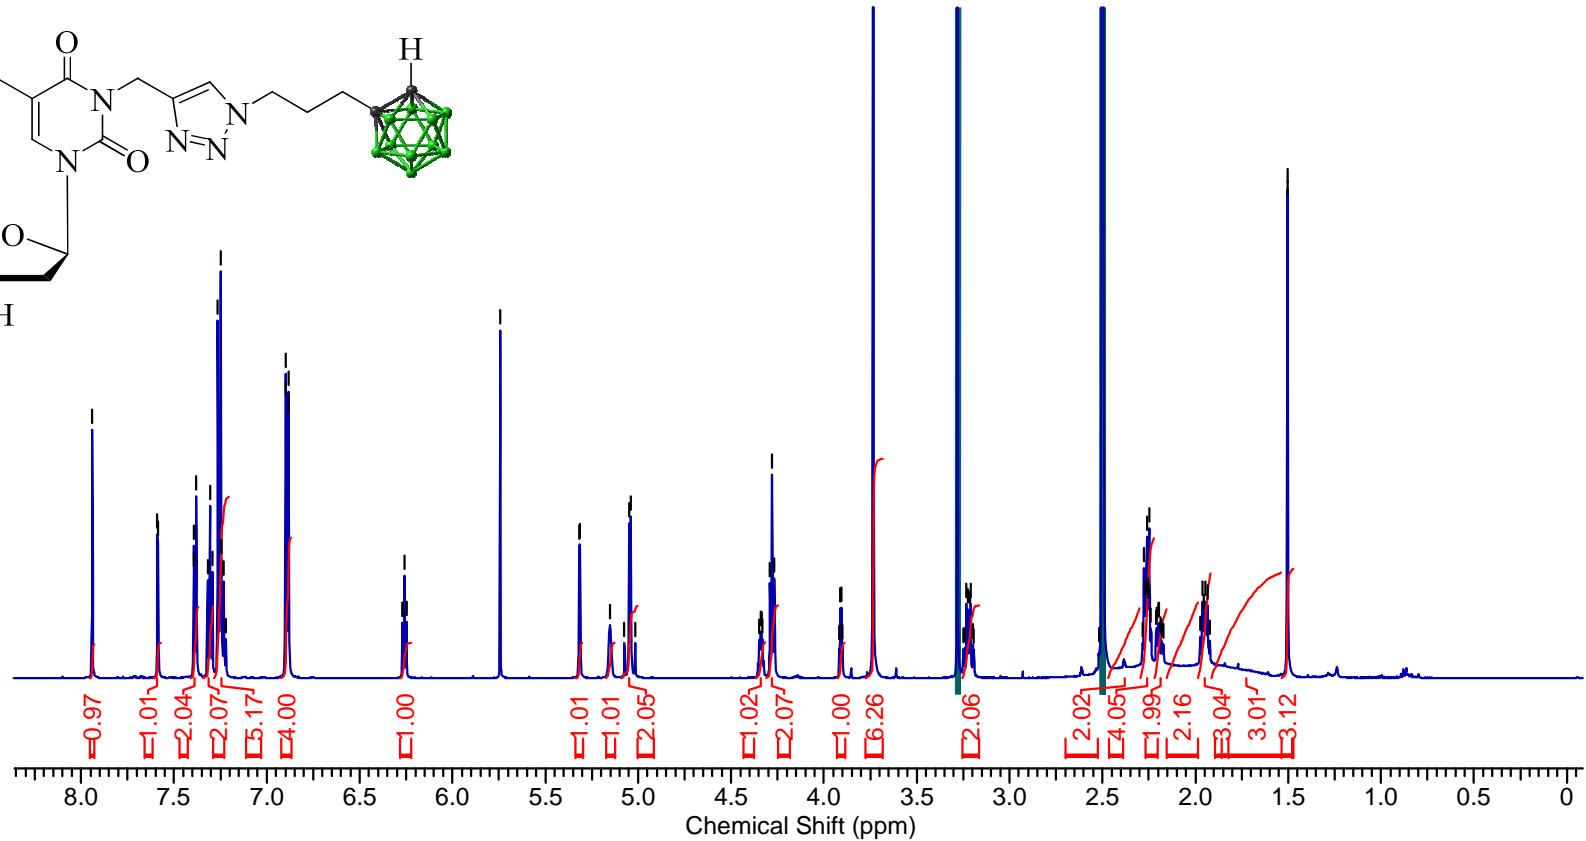

Figure S8. <sup>1</sup>H NMR spectrum of compound 21.

III-MM-43.020.001.1r.esp

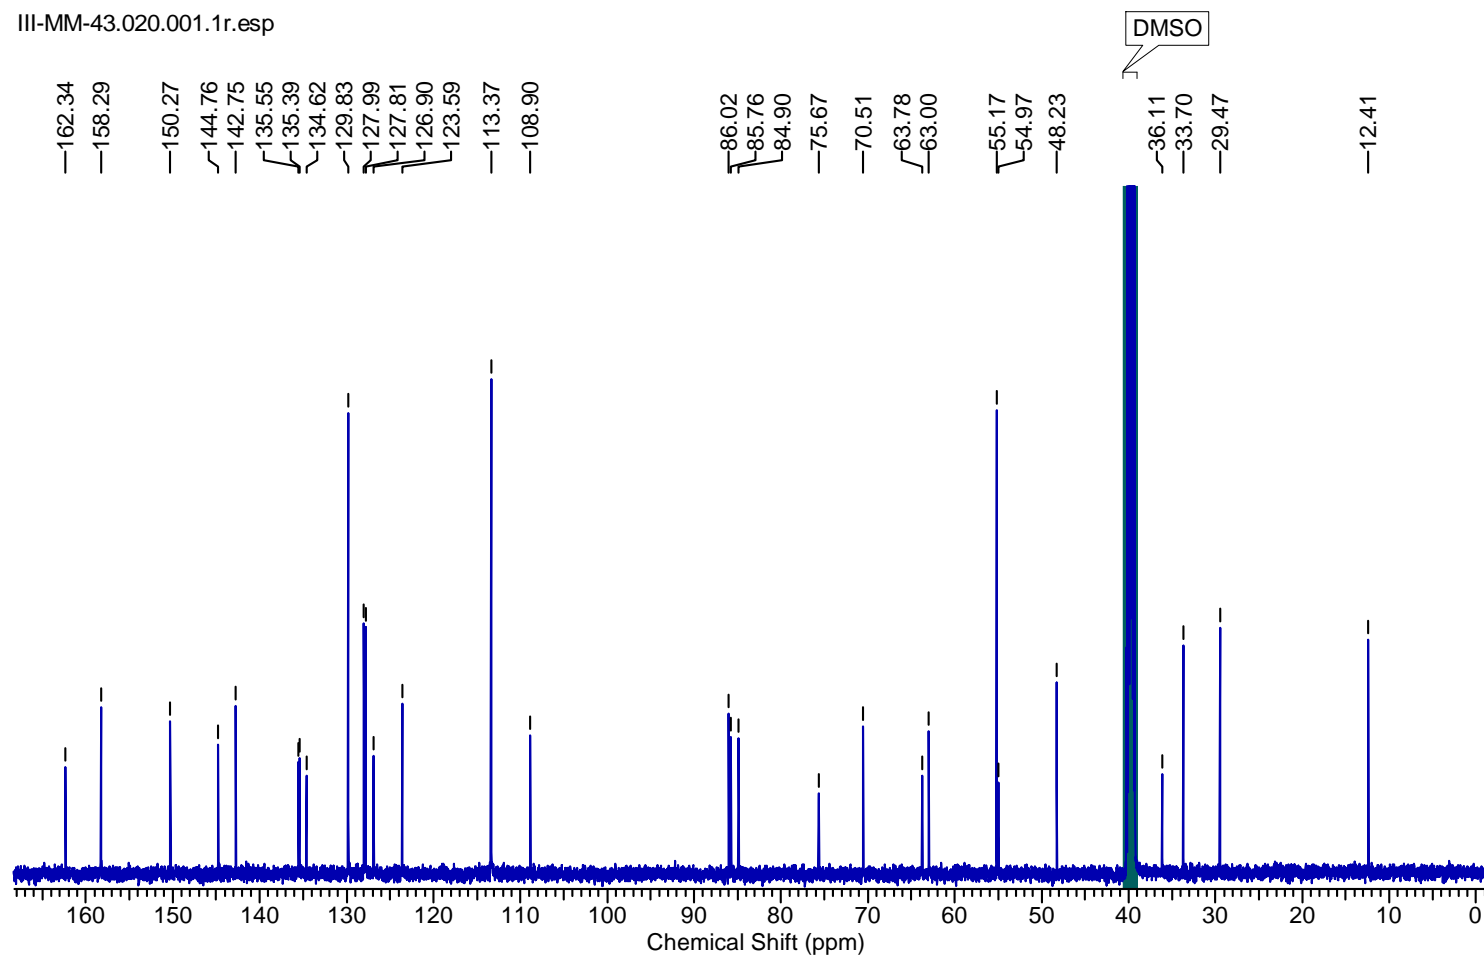

Figure S9.  $^{13}\text{C}$  NMR spectrum of compound **21**.

III-MM-43.021.001.1r.esp

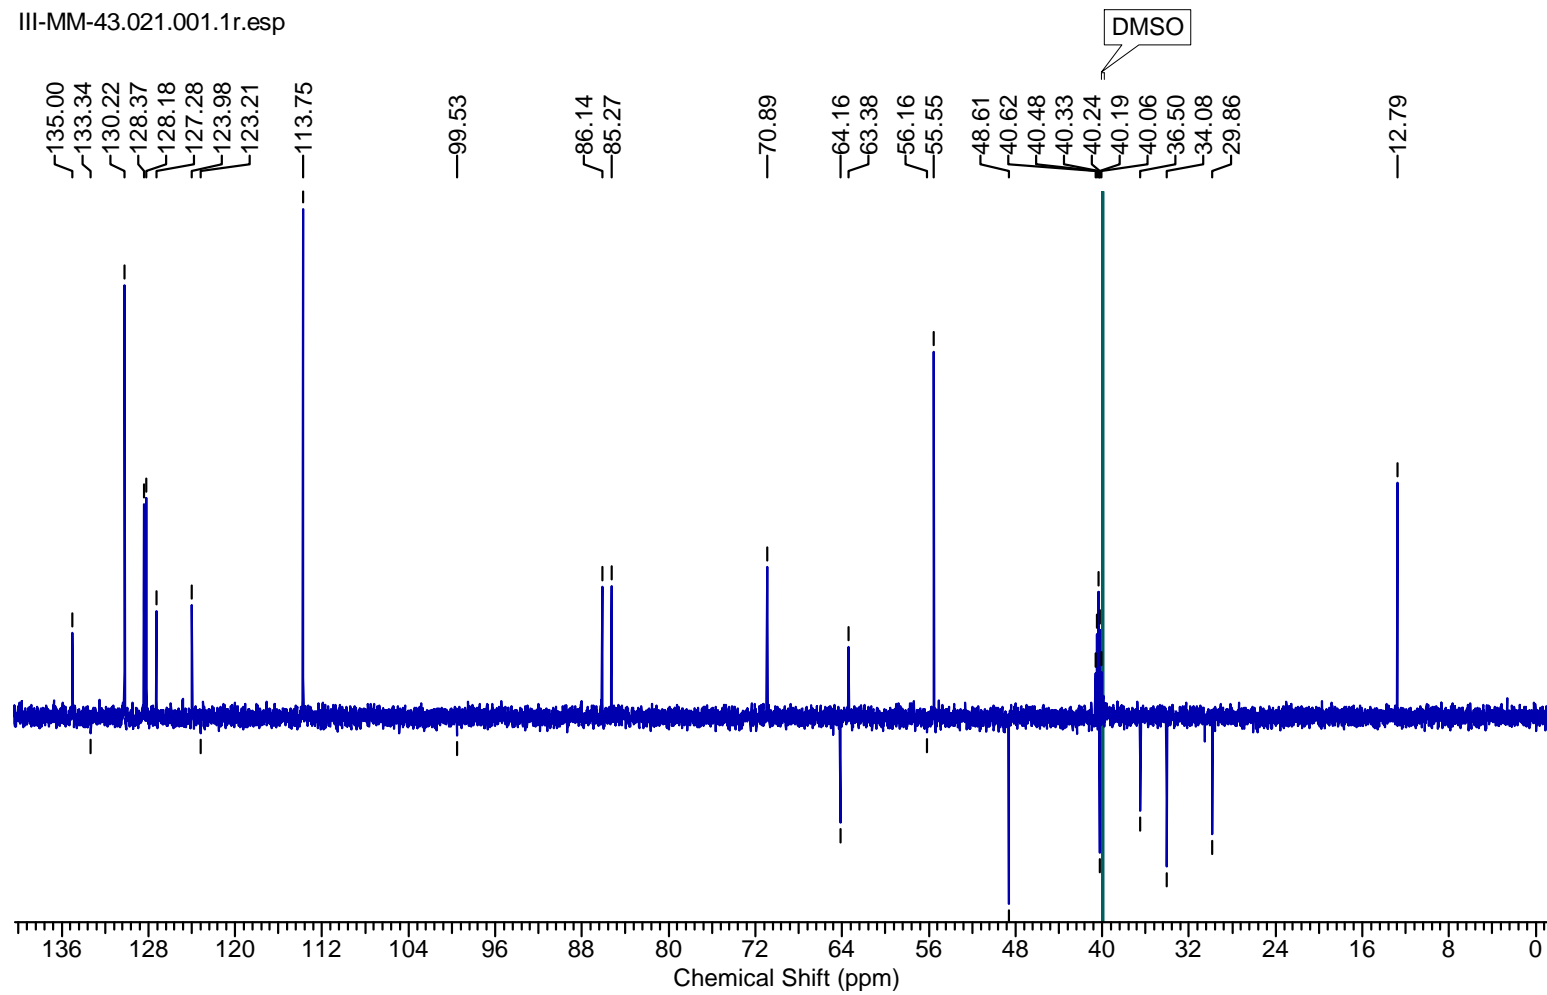

**Figure S10.** DEPT-135 spectrum of compound **21**.

III-MM-43.003.001.1r.esp

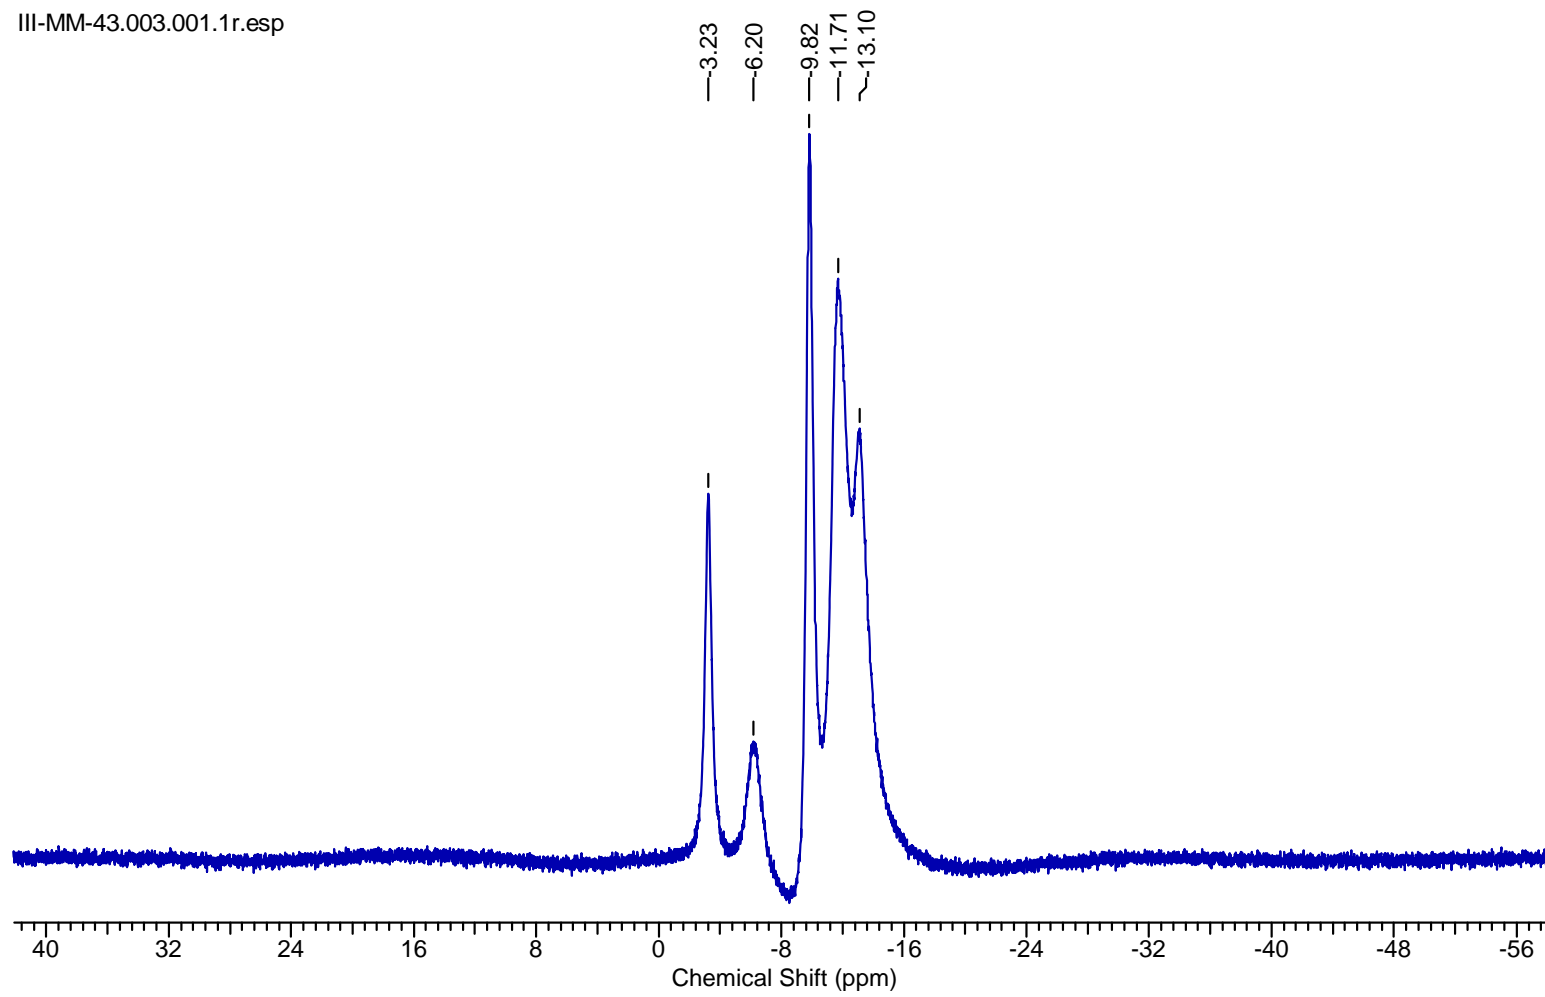

*Figure S11.*  $^{11}\text{B}$  {H BB} NMR spectrum of compound **21**.

III-MM-43.004.001.1r.esp

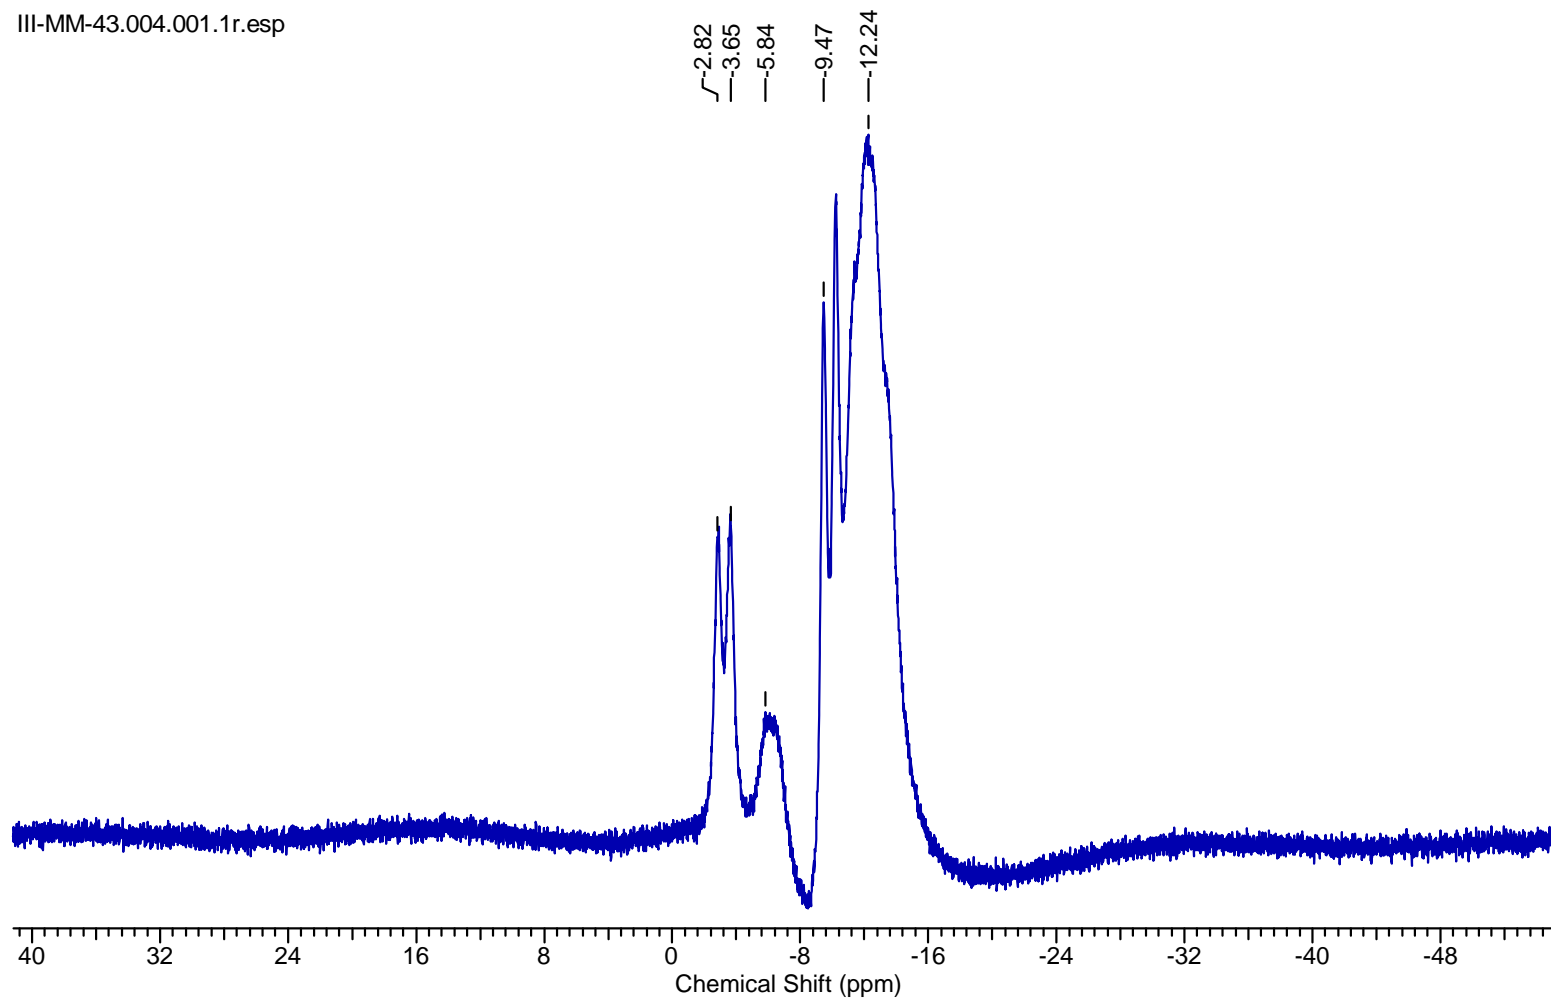

*Figure S12.*  $^{11}\text{B}$  NMR spectrum of compound **21**.



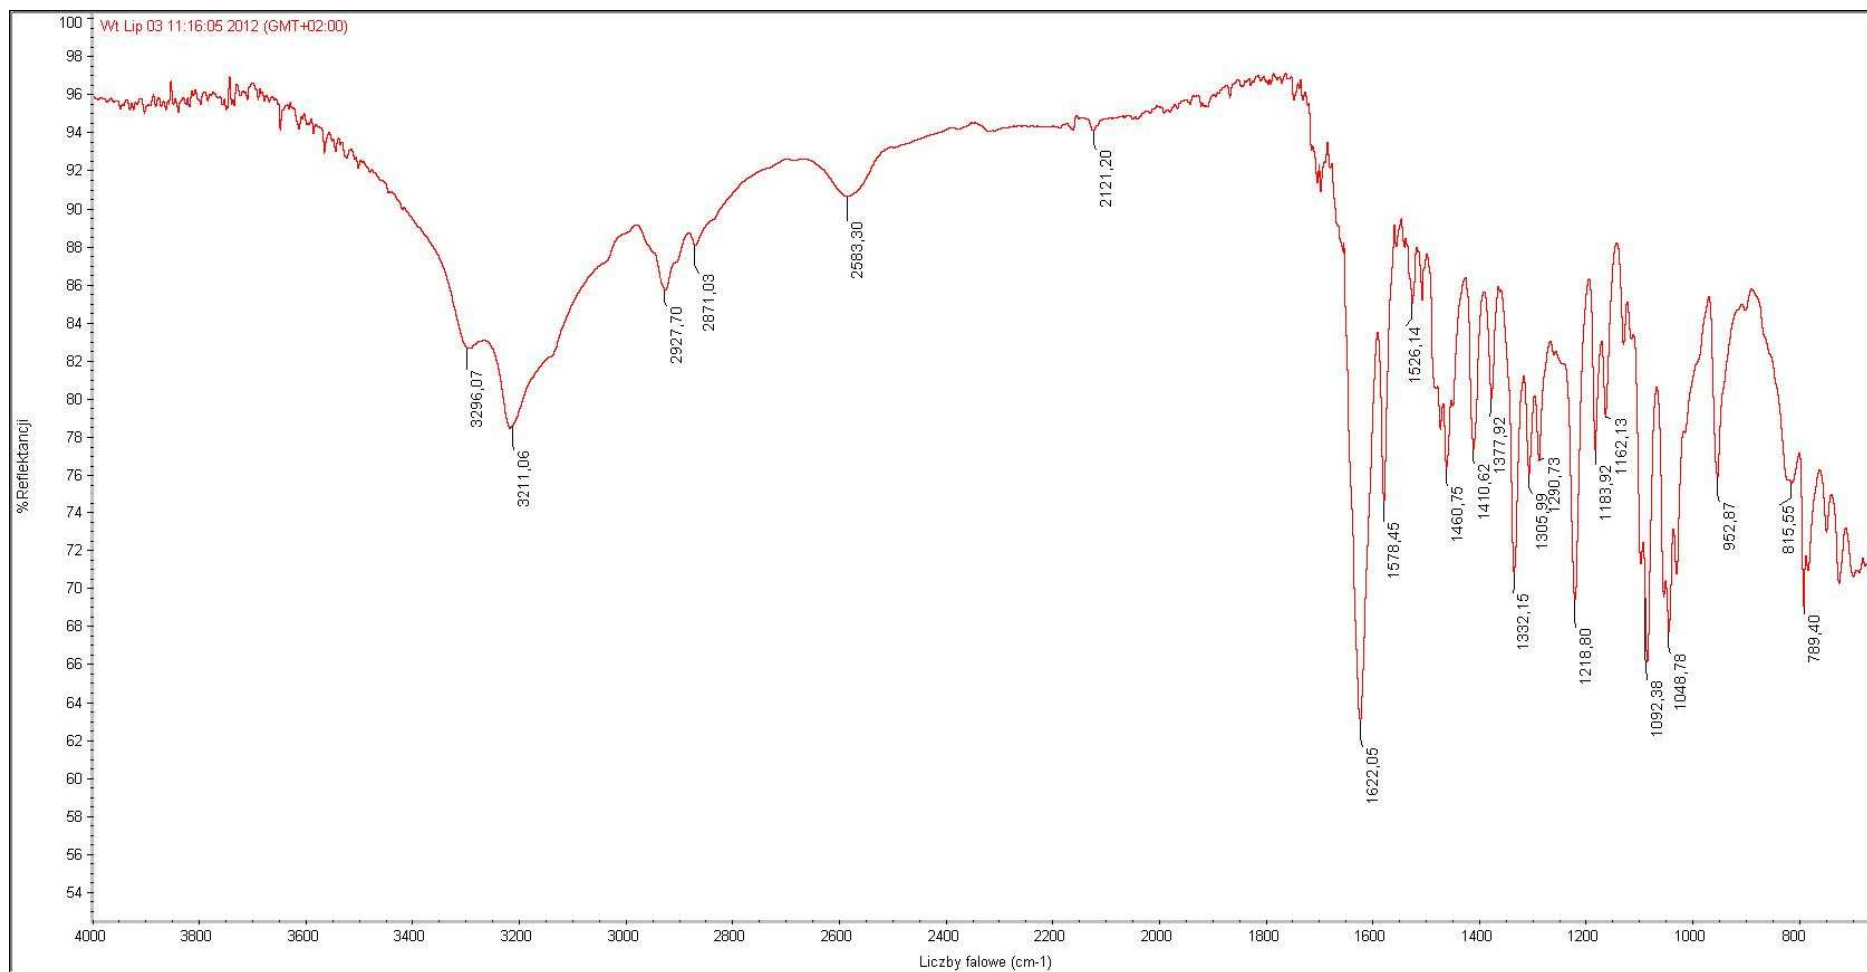

**Figure S13.** IR spectrum of compound **21**.



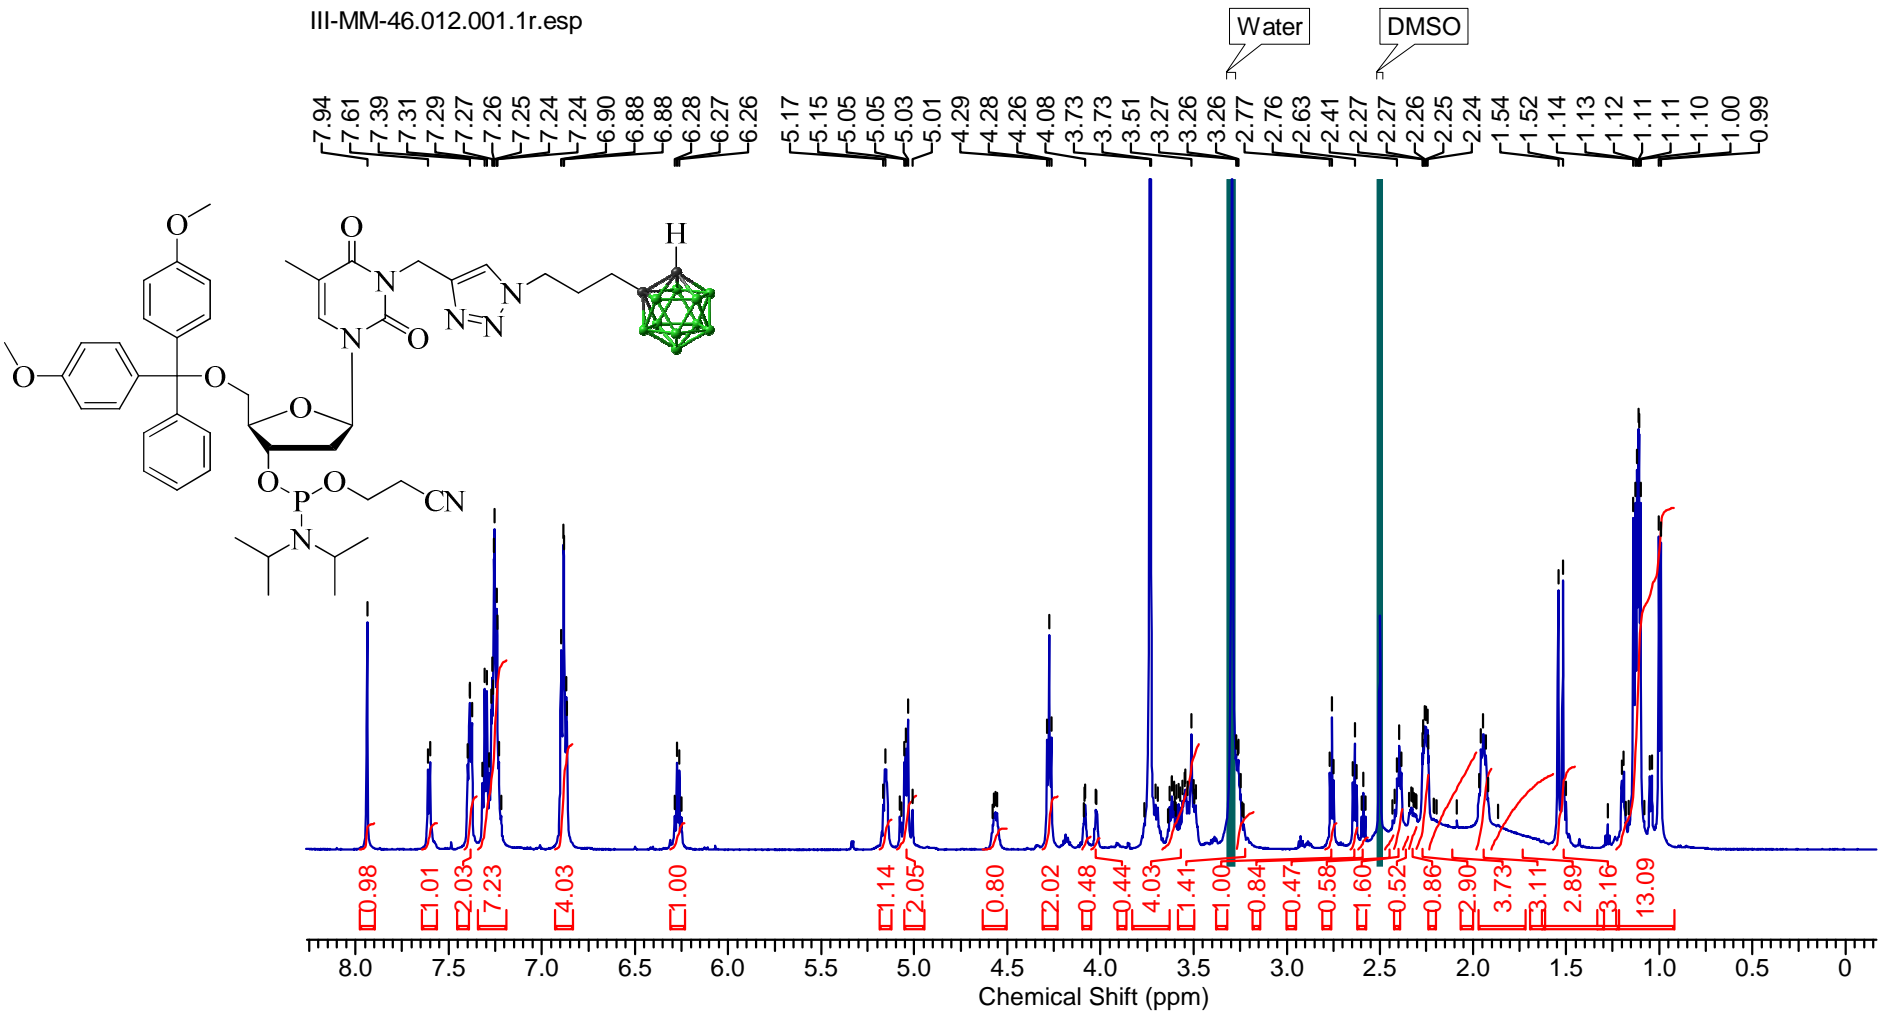

Figure S15.  $^1\text{H}$  NMR spectrum of compound 29.

III-MM-46.010.001.1r.esp

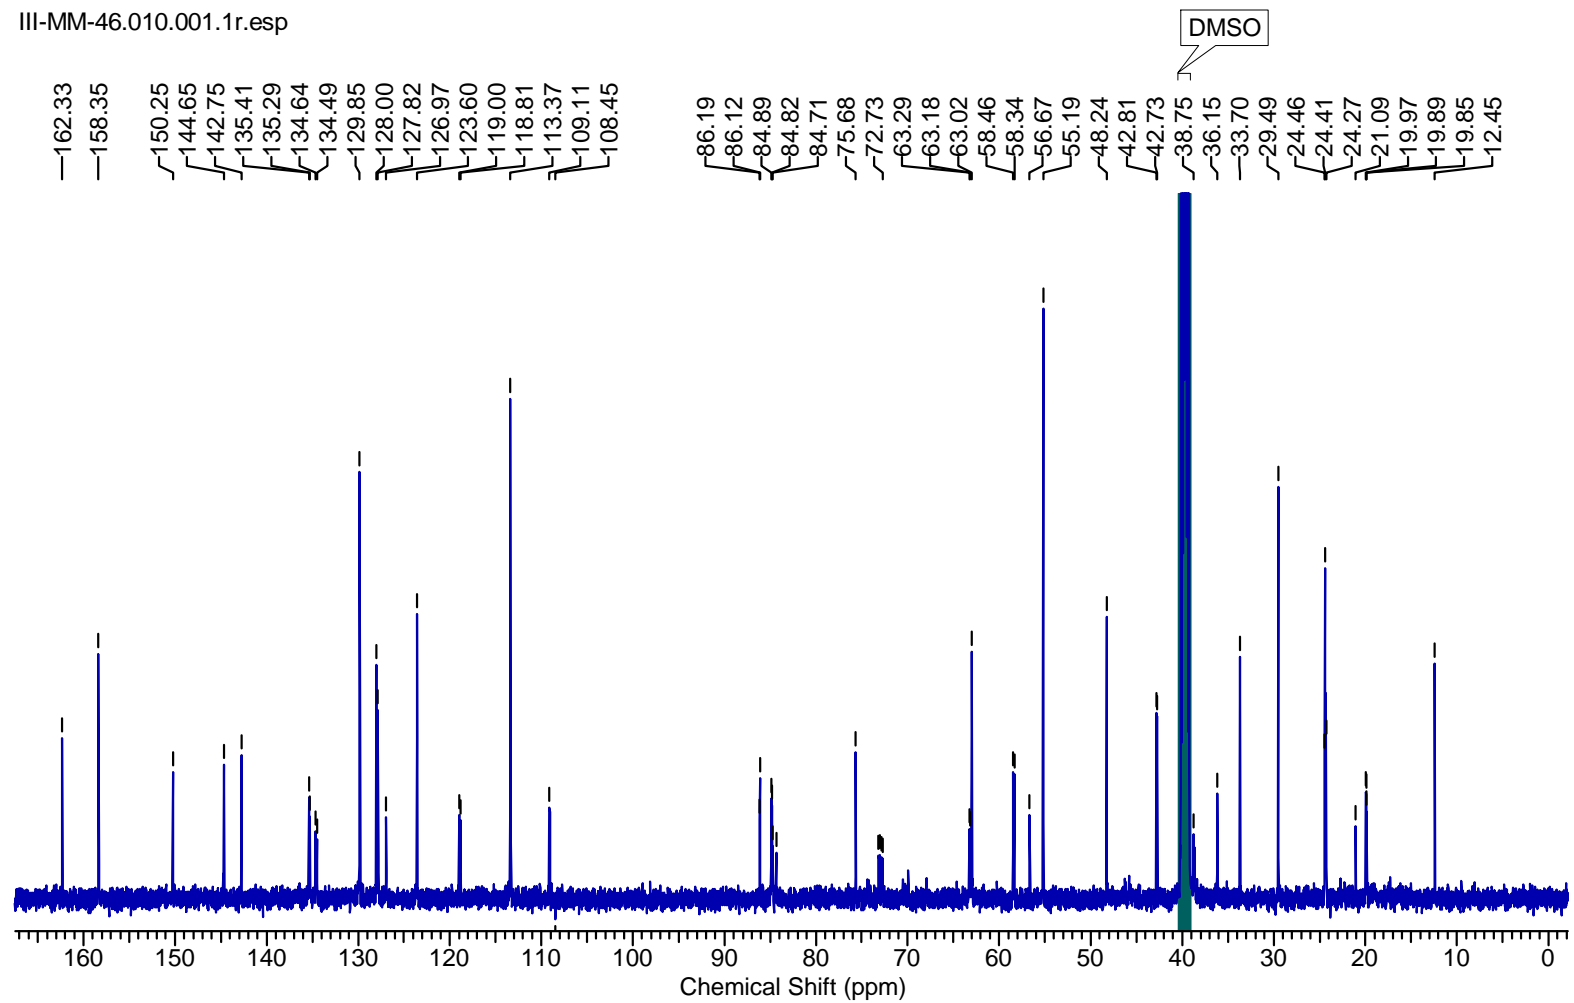

Figure S16.  $^{13}\text{C}$  NMR spectrum of compound **29**.

III-MM-46.011.001.1r.esp

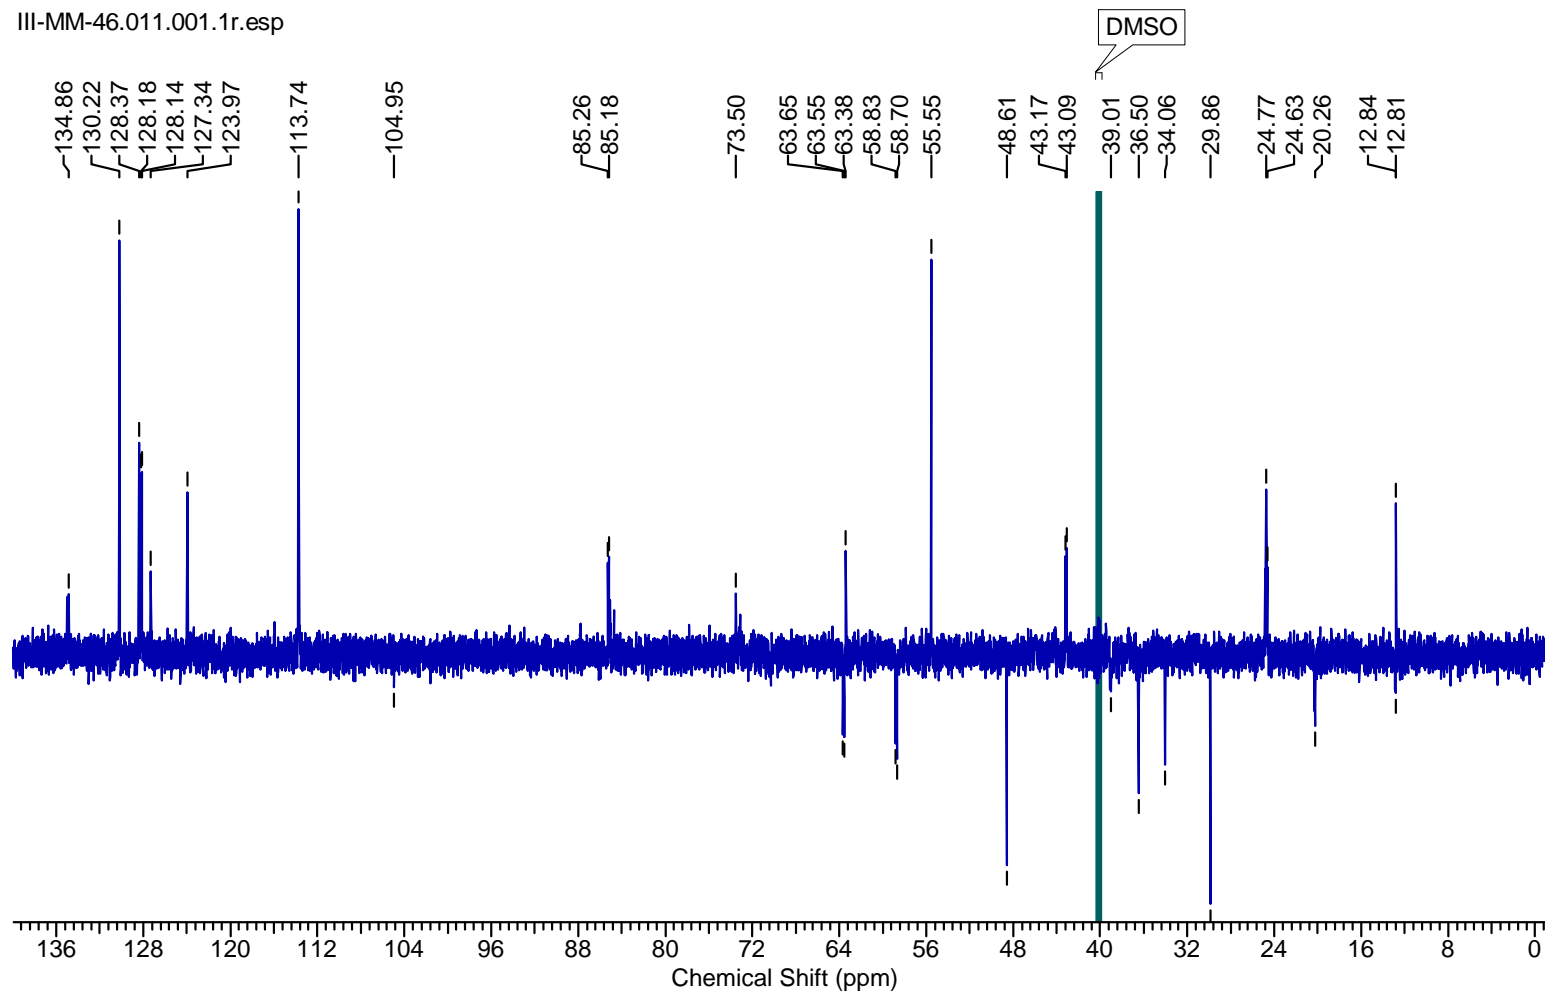

*Figure S17.* DEPT-135 spectrum of compound **29**.

III-MM-46.003.001.1r.esp

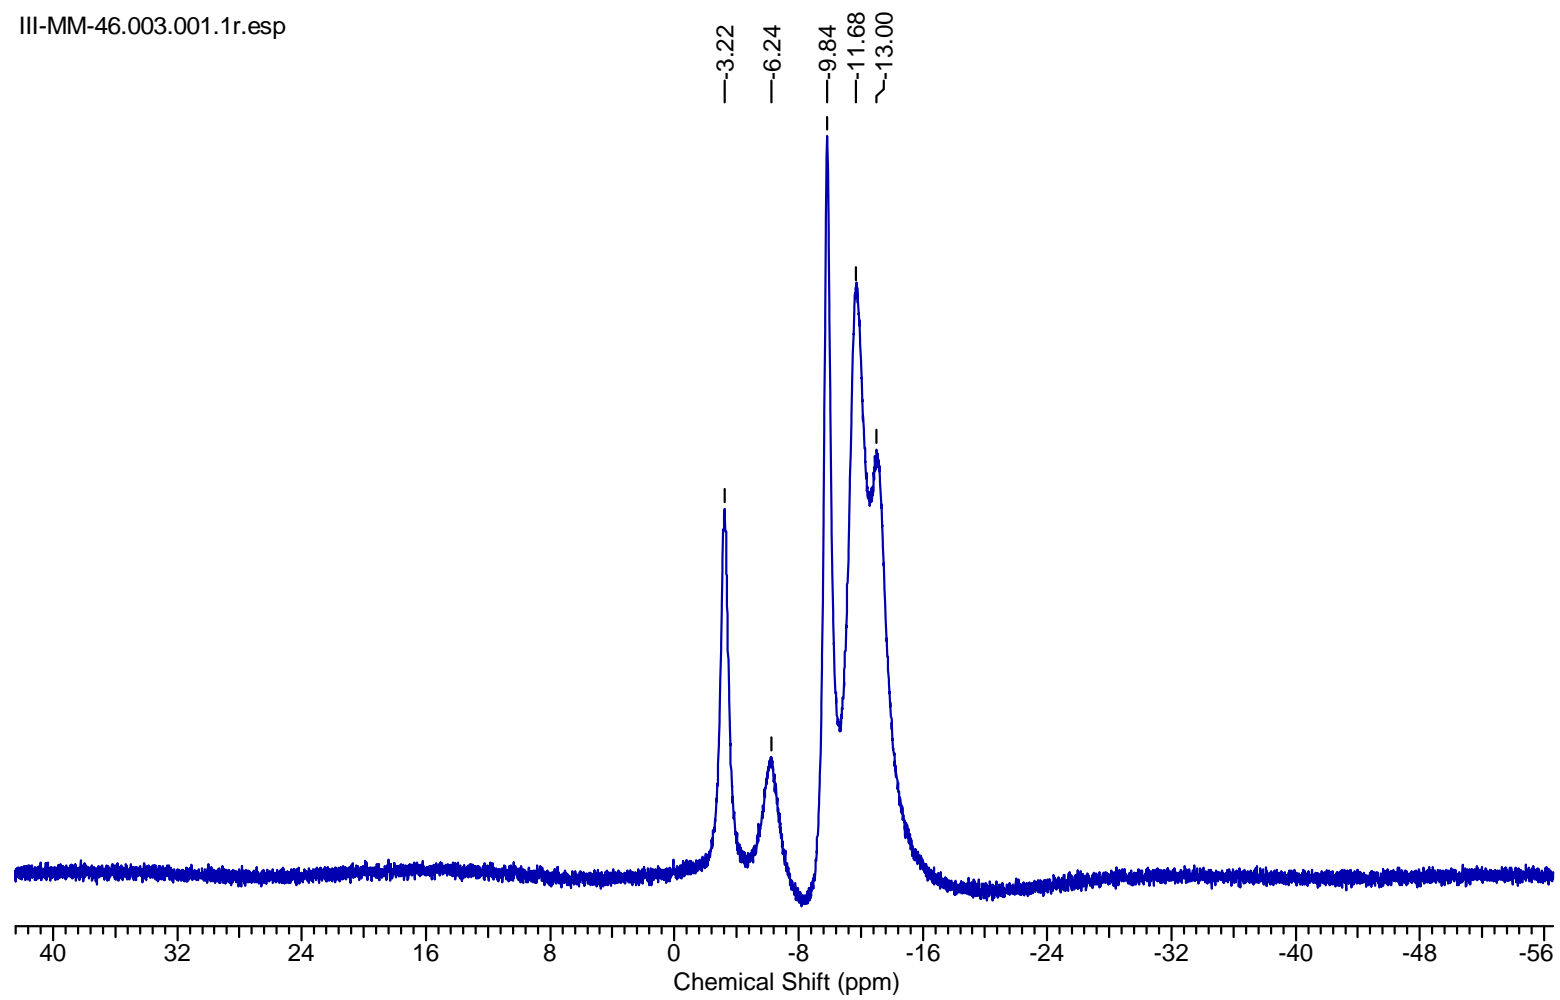

*Figure S18.*  $^{11}\text{B}$  {H BB} NMR spectrum of compound **29**.

III-MM-46.004.001.1r.esp

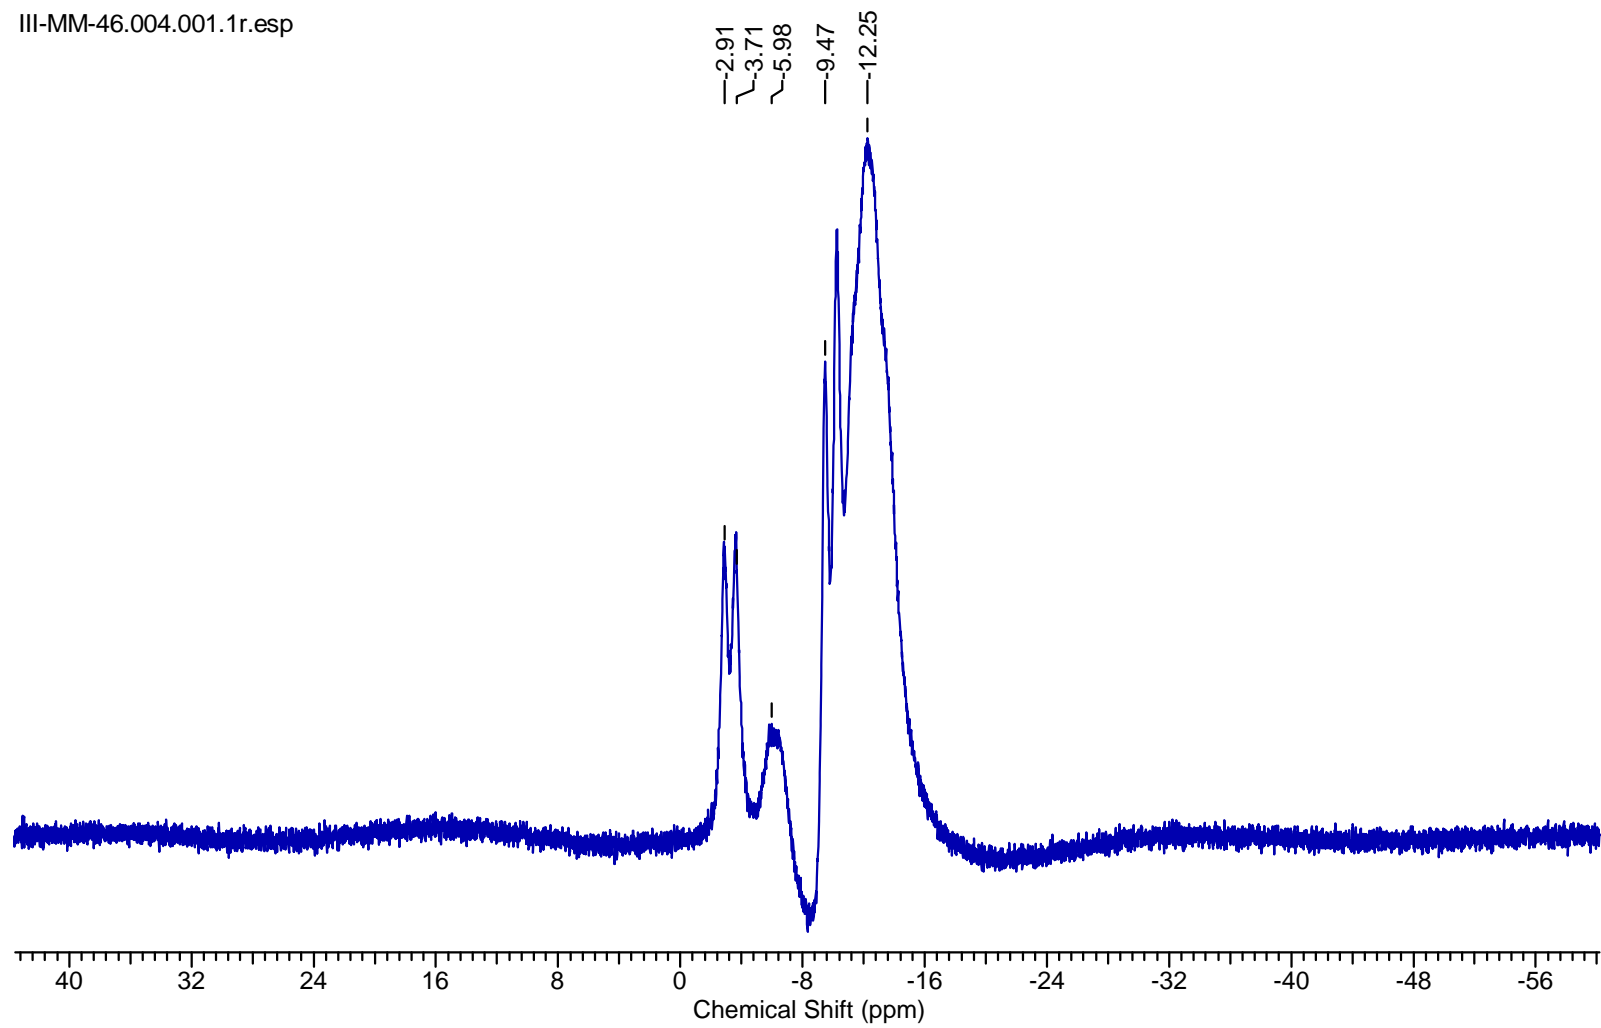

*Figure S19.*  $^{11}\text{B}$  NMR spectrum of compound **29**.

III-MM-46.005.001.1r.esp

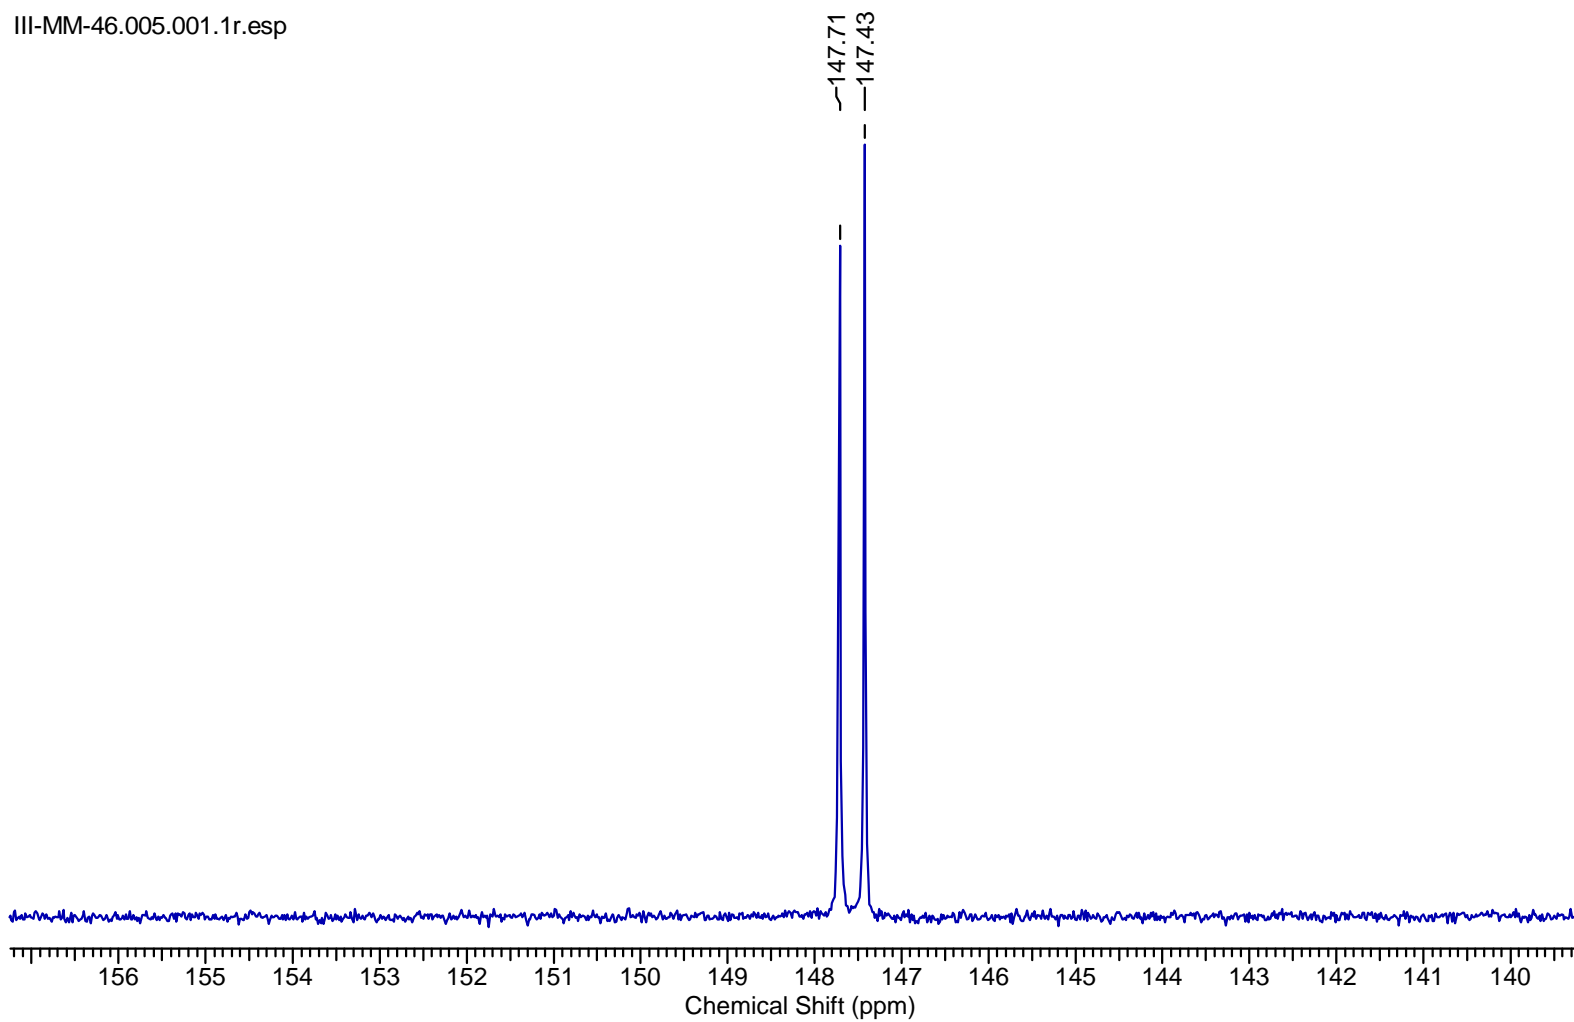

*Figure S20.*  $^{31}\text{P}$  NMR spectrum of compound **29**.



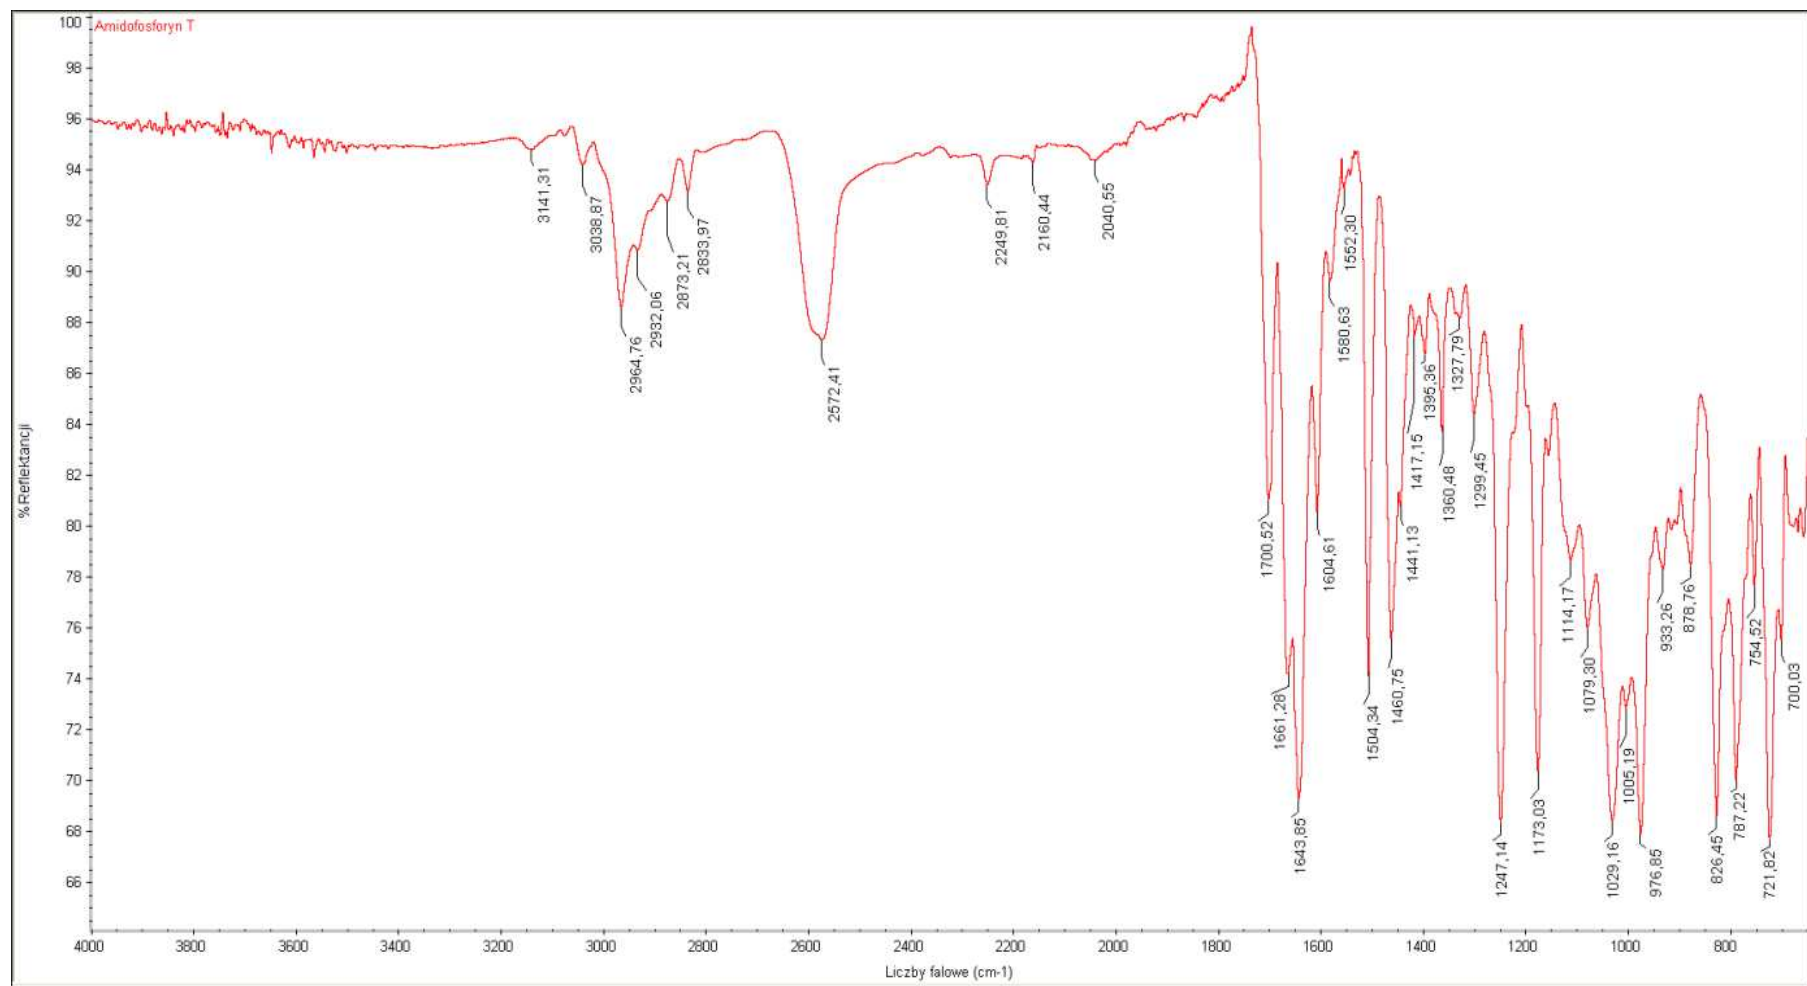

Figure S21. IR spectrum of compound 29.

SPEC: ax745ibm 12-Jul-12 REG : 00:16.8 #9  
 Samp: III-MM-46 Start : 09:20:43 10  
 Comm: LSI, Cs+ 13 keV, nba  
 Mode: FAB +VE +LMR BSCAN (EXP) UP LR NRM Study : MS CBMIM PAN Lodz  
 Oper: ed Client: IBM A.Olejniczak Inlet :  
 Base: 303.2 Inten : 2381322 Masses: 100 > 1117  
 Norm: 303.2 RIC : 8557821 #peaks: 789  
 Peak: 1000.00 mmu  
 Data: +1>10

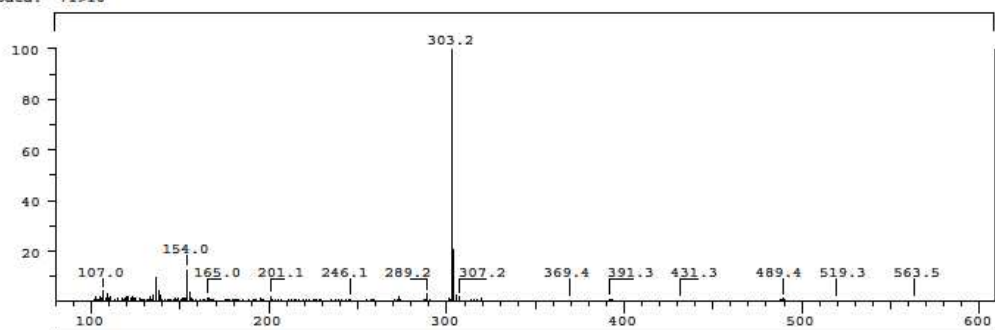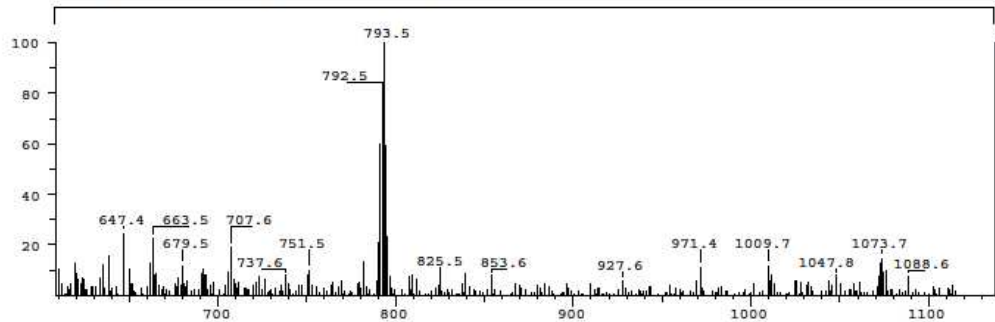

SPEC: ax745ibm b 12-Jul-12 REG : 00:16.8 #9  
 Samp: III-MM-46 Start : 09:33:45 10  
 Comm: LSI, Cs+ 13 keV, nba  
 Mode: FAB -VE -LMR BSCAN (EXP) UP LR NRM Study : MS CBMIM PAN Lodz  
 Oper: ed Client: IBM A.Olejniczak Inlet :  
 Base: 152.9 Inten : 220419 Masses: 100 > 1117  
 Norm: 152.9 RIC : 3129984 #peaks: 672  
 Peak: 1000.00 mmu  
 Data: +1>10

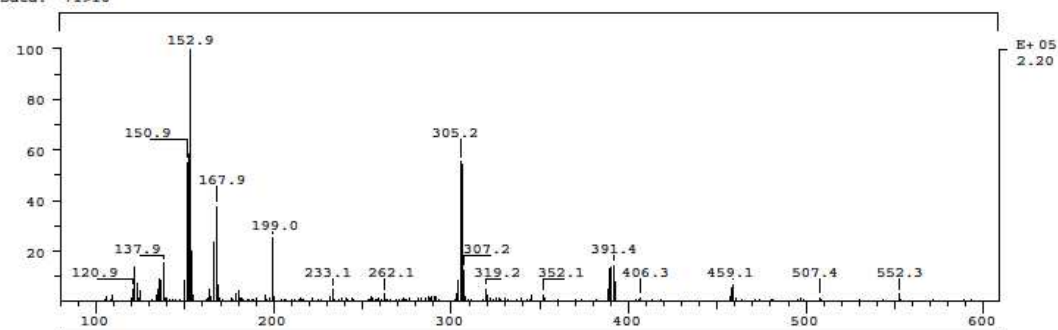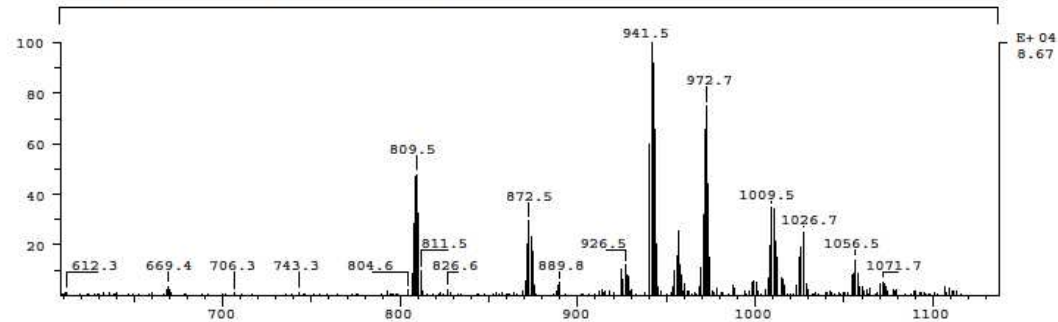

Figure S22. MS-FAB spectra of compound 29.

II-MM-49.010.001.1r.esp

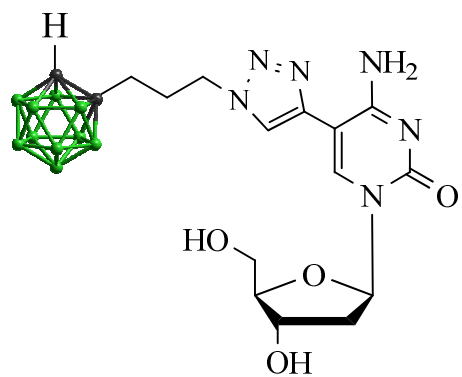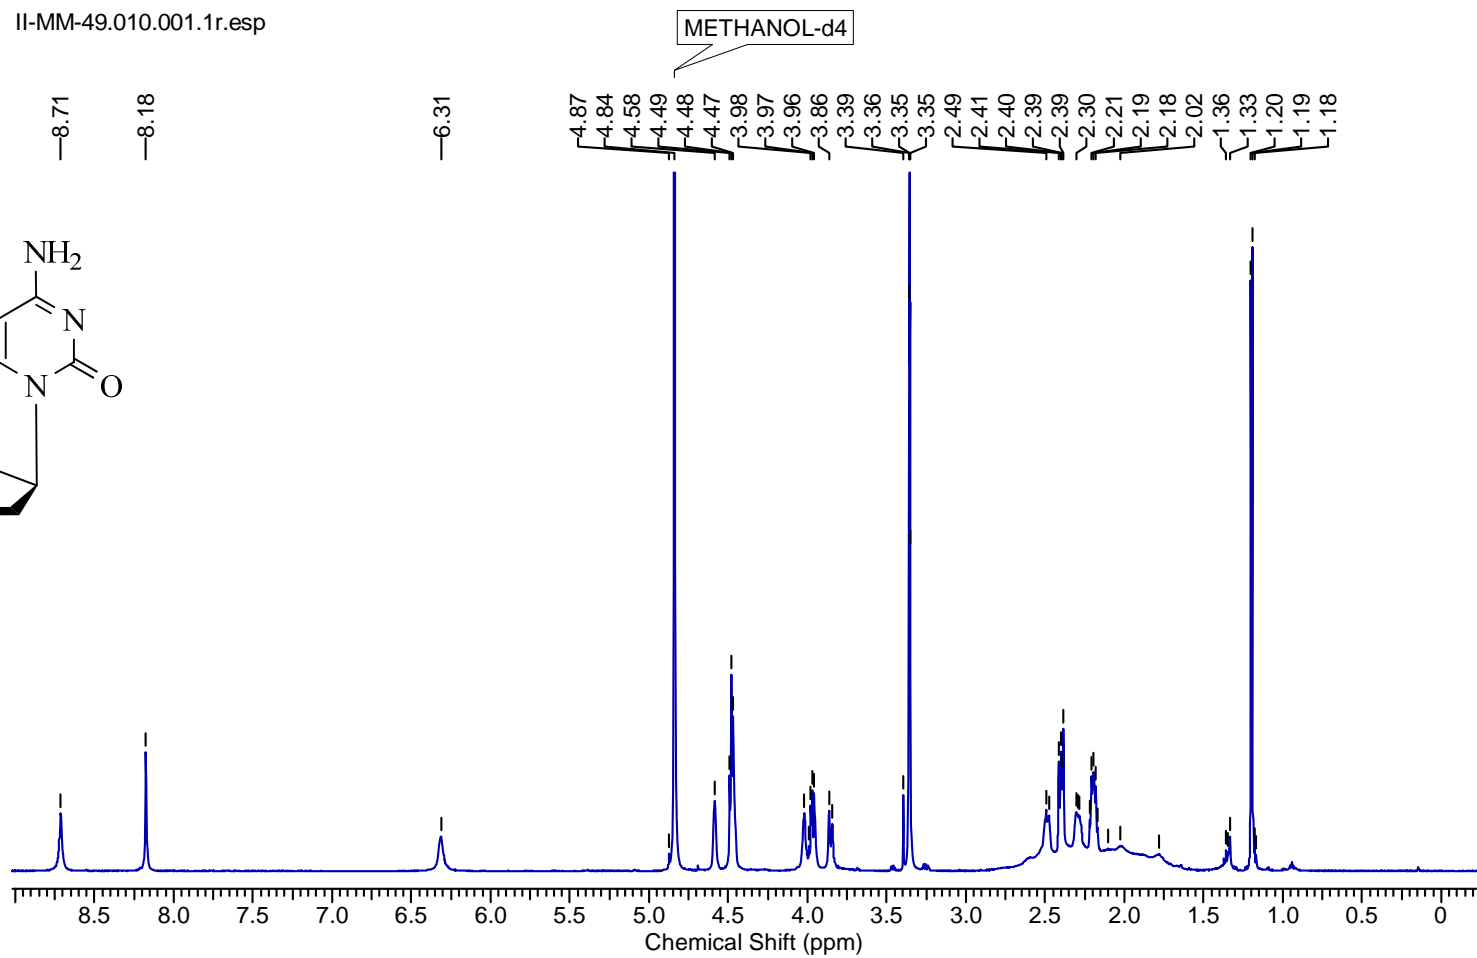

Figure S23.  $^1\text{H}$  NMR spectrum of compound **22**.

II-MM-49.013.001.1r.esp

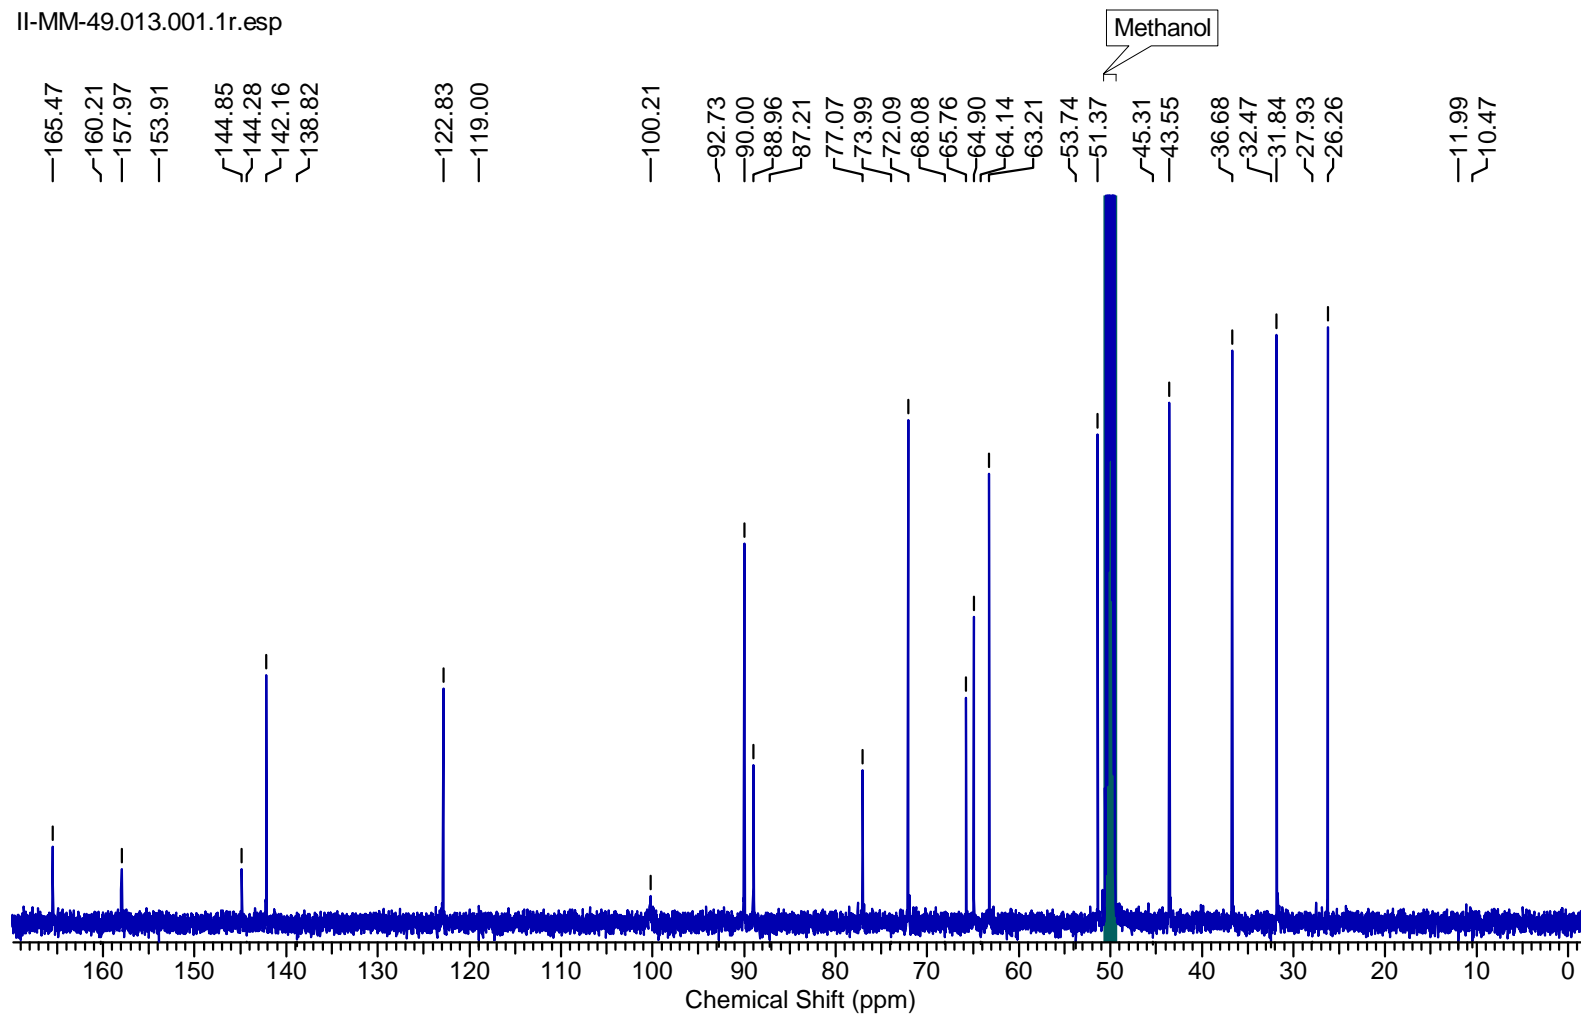

Figure S24.  $^{13}\text{C}$  NMR spectrum of compound 22.

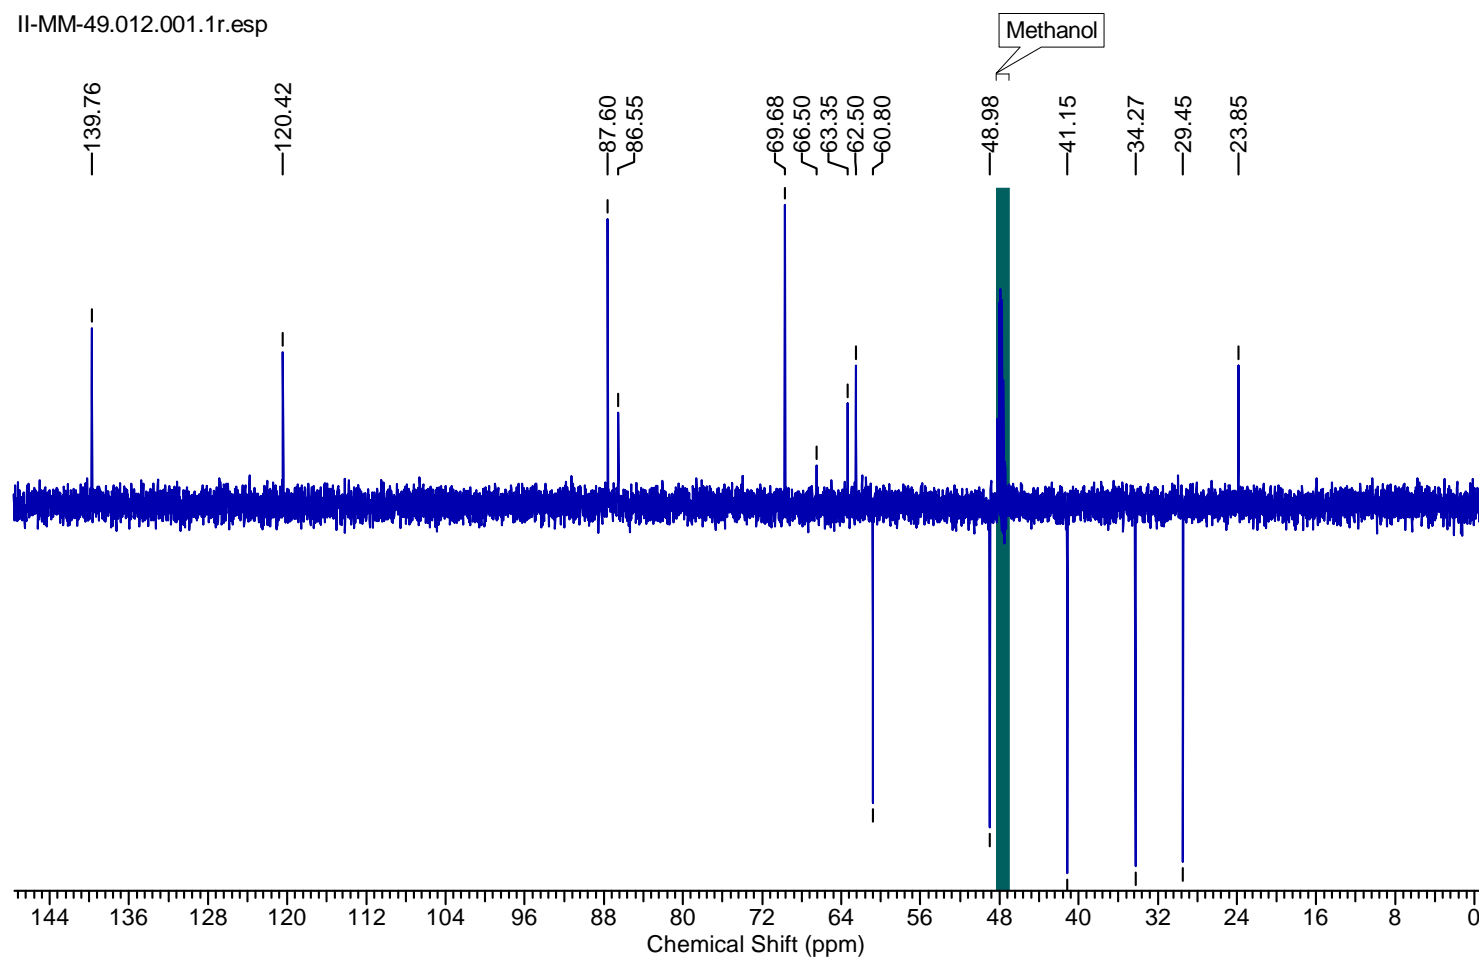

*Figure S25.* DEPT-135 spectrum of compound **22**.

II-MM-49.005.001.1r.esp

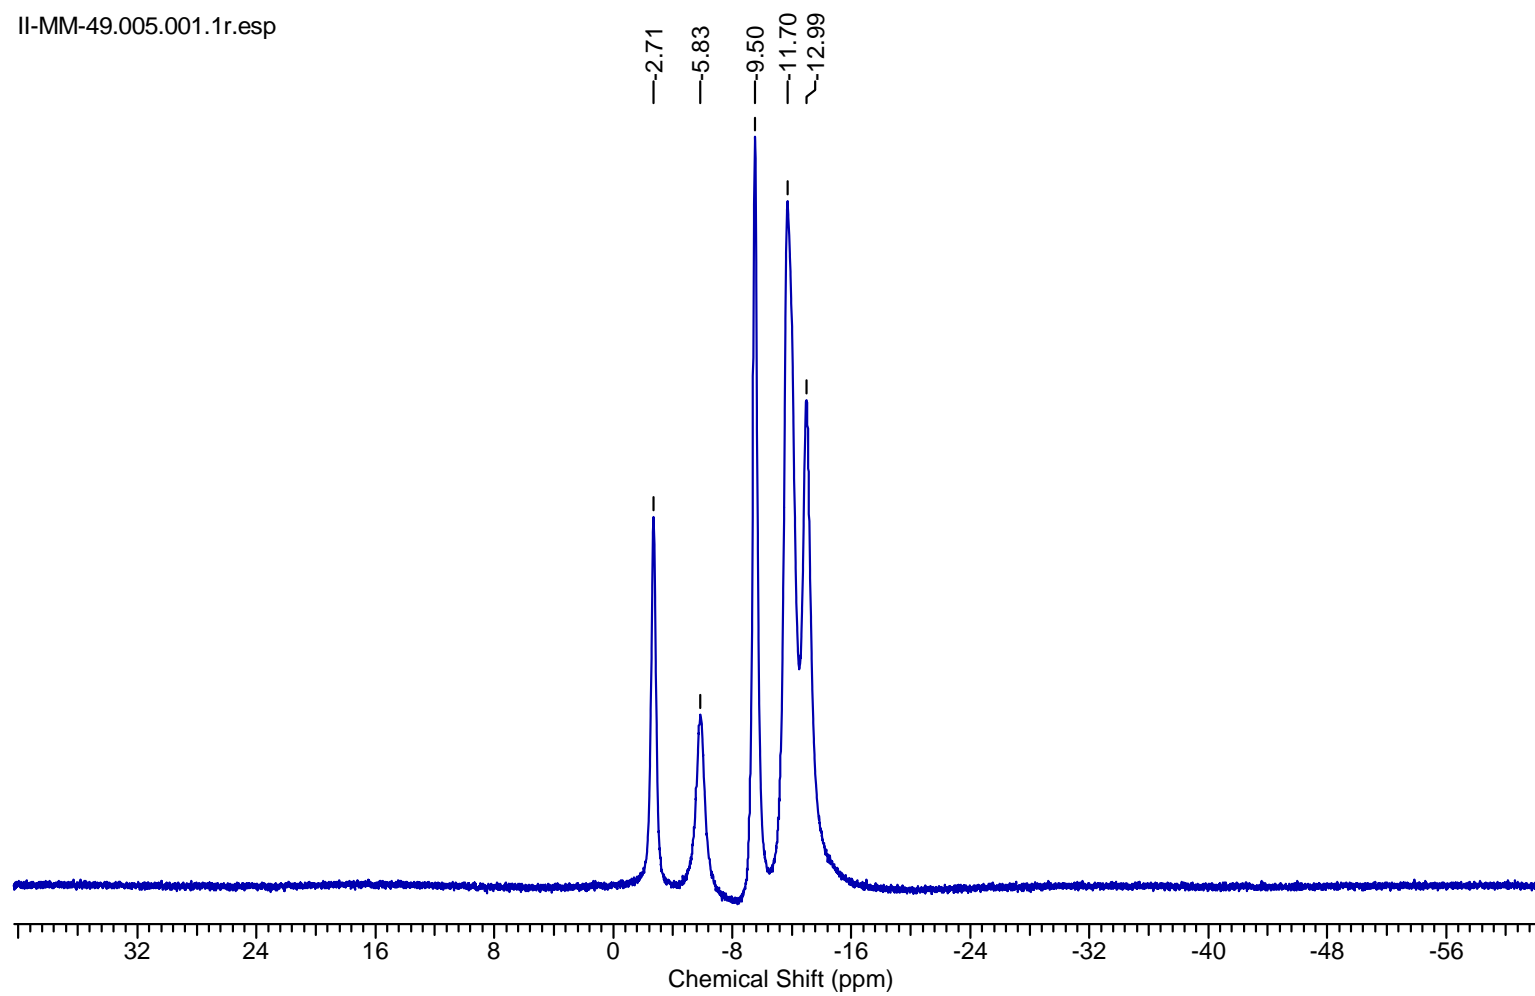

*Figure S26.*  $^{11}\text{B}$  {H BB} NMR spectrum of compound **22**.

II-MM-49.006.001.1r.esp

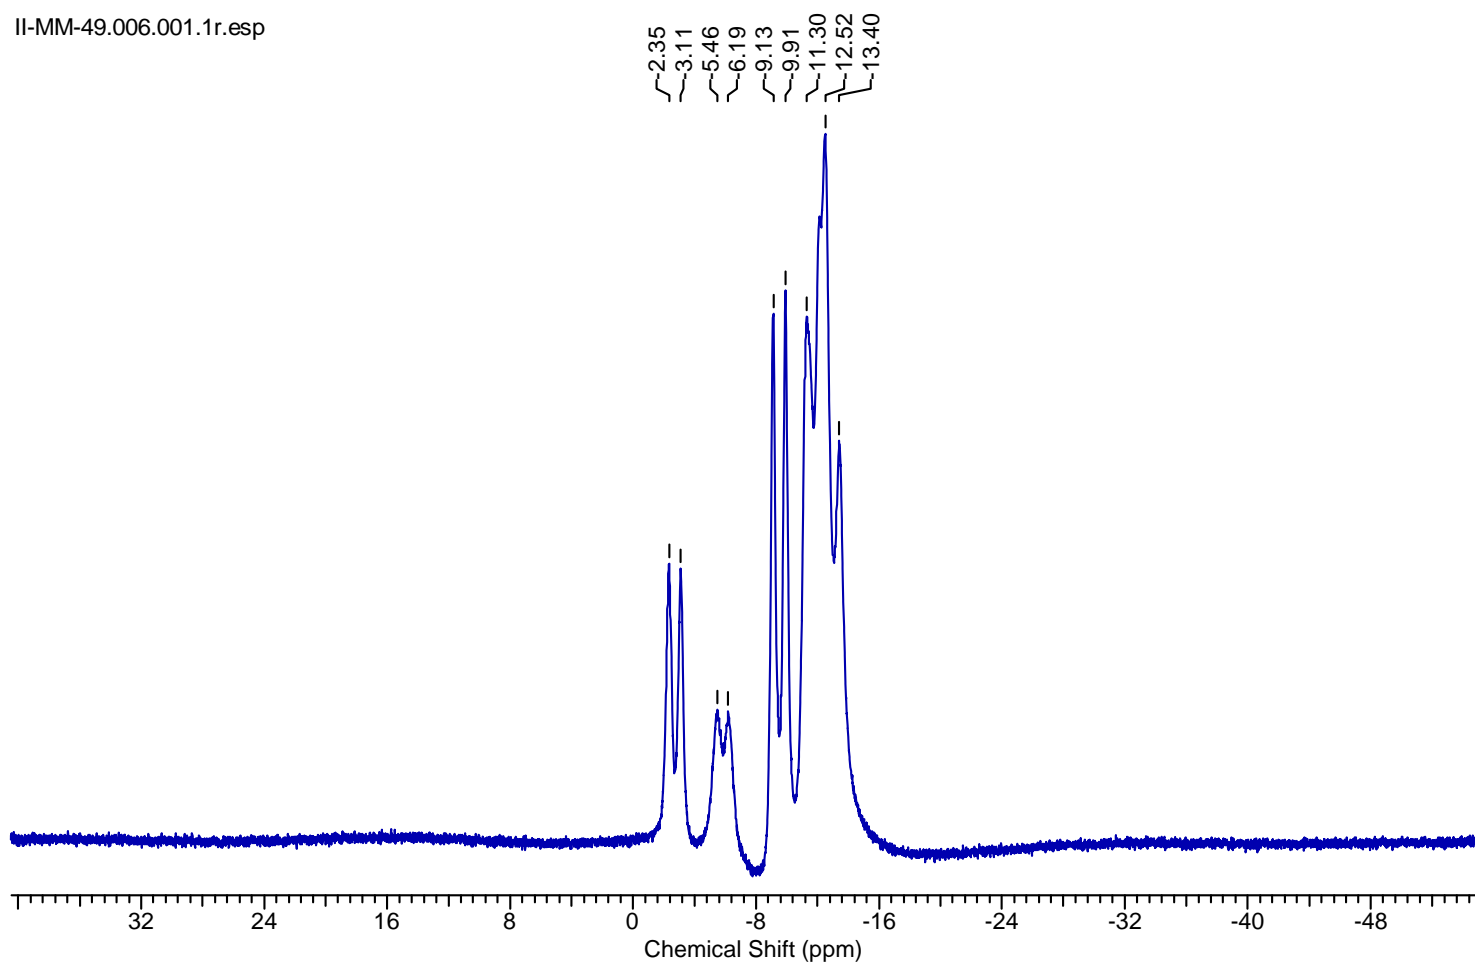

*Figure S27.*  $^{11}\text{B}$  NMR spectrum of compound **22**.

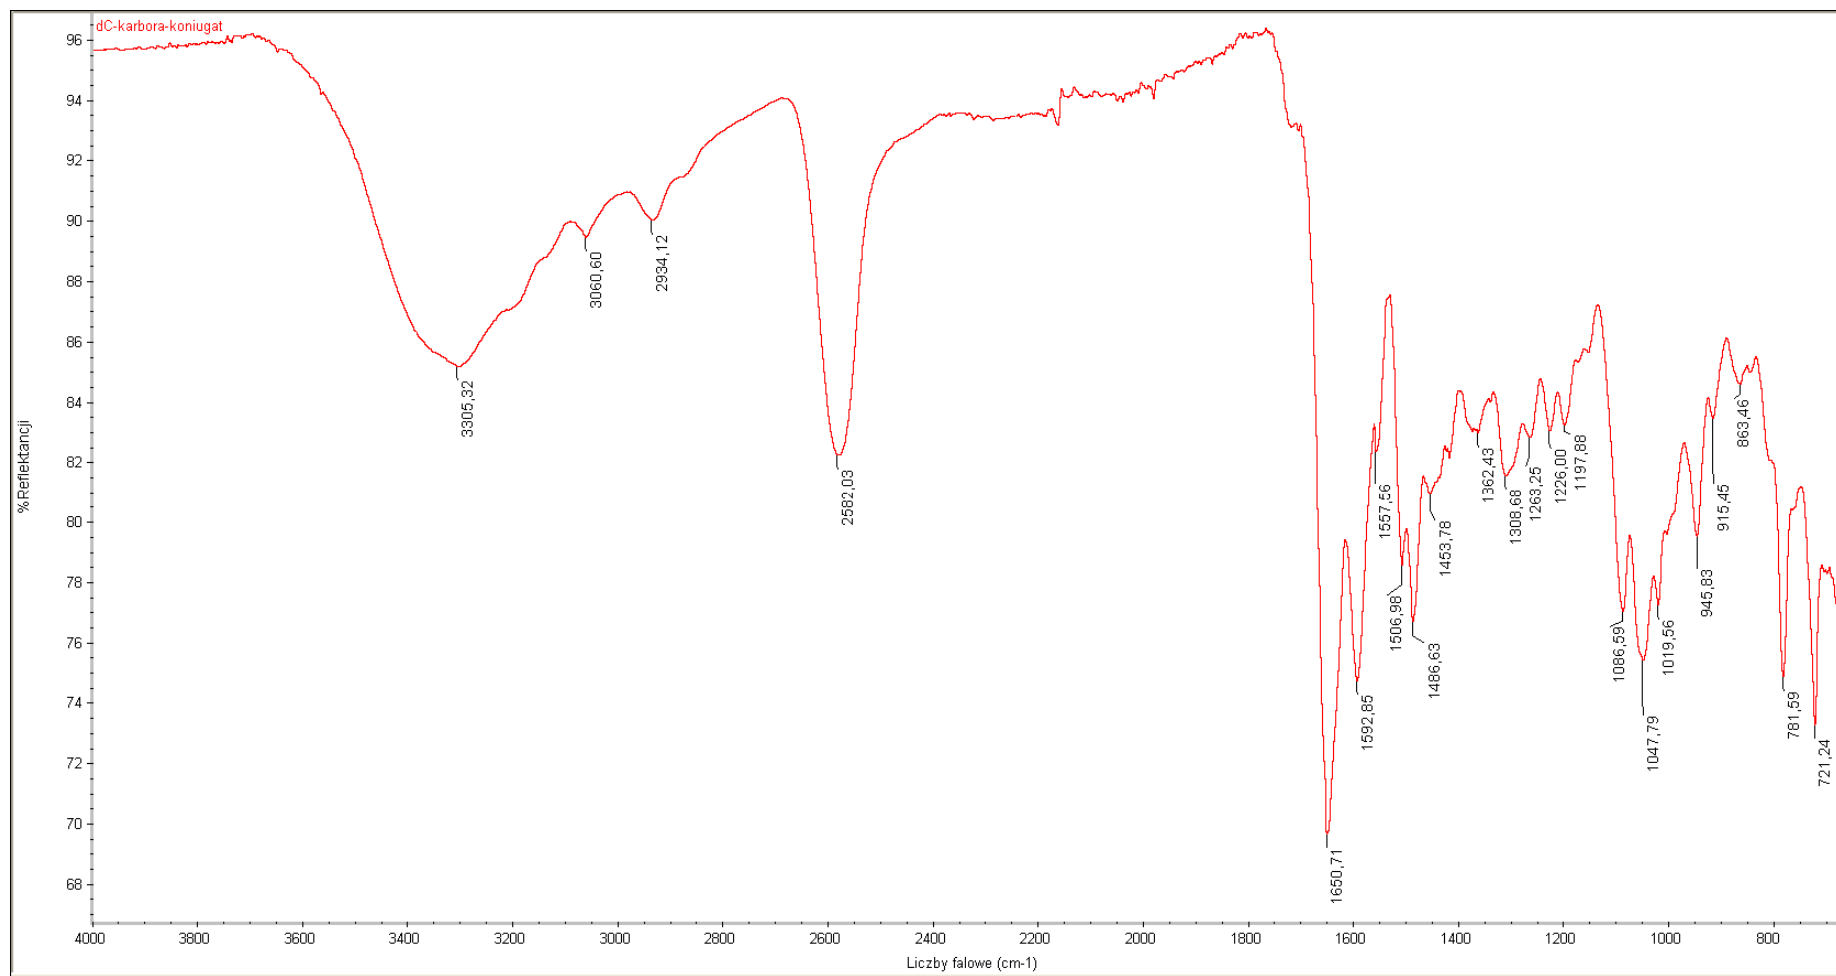

**Figure S28.** IR spectrum of compound **22**.



SPEC: ax2221bm                    28-Mar-12    REG : 00:16.4    #9  
 Samp: 11-MM-49                    Start : 11:40:37    10  
 Comm: LSI, Cs+ 13 keV, gly  
 Mode: FAB +VS +LMR BSCAN (EXP) UP LR NRM                    Study : MS CBMIM PAN Lodz  
 Oper: es                    Client: IBM A.Olejniczak                    Inlet :  
 Base: 363.3                    InLen : 638819                    Masses: 100 > 1000  
 Norm: 363.3                    RIC : 5927654                    #peaks: 745  
 Peak: 1000.00 mmu  
 Data: +1>10

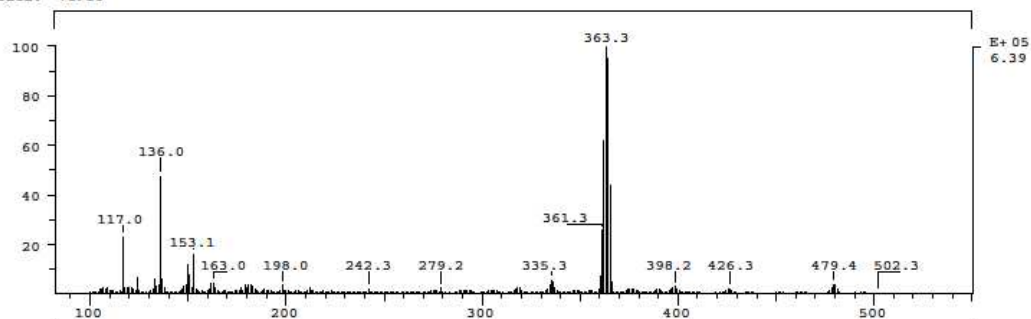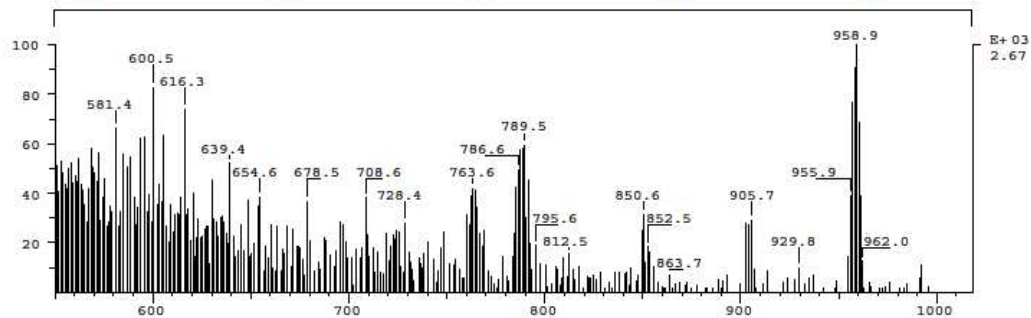

SPEC: ax2221bm\_b                    28-Mar-12    REG : 00:16.4    #9  
 Samp: 11-MM-49                    Start : 11:53:31    10  
 Comm: LSI, Cs+ 13 keV, gly  
 Mode: FAB -VE -LMR BSCAN (EXP) UP LR NRM                    Study : MS CBMIM PAN Lodz  
 Oper: es                    Client: IBM A.Olejniczak                    Inlet :  
 Base: 478.4                    Inten : 465097                    Masses: 100 > 1000  
 Norm: 478.4                    RIC : 14533607                    #peaks: 900  
 Peak: 1000.00 mmu  
 Data: +1>10

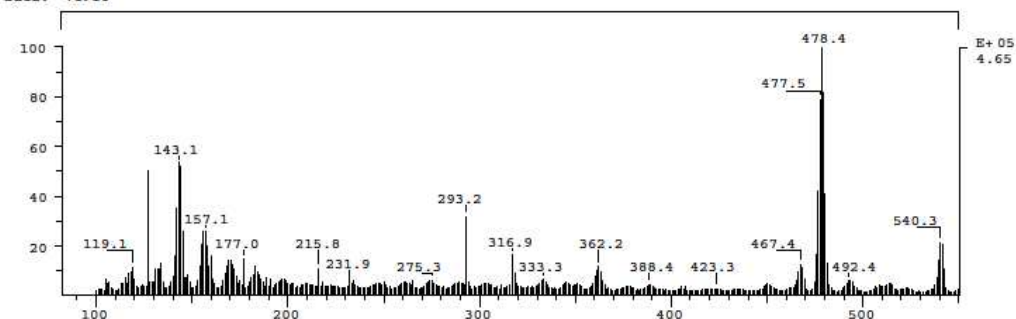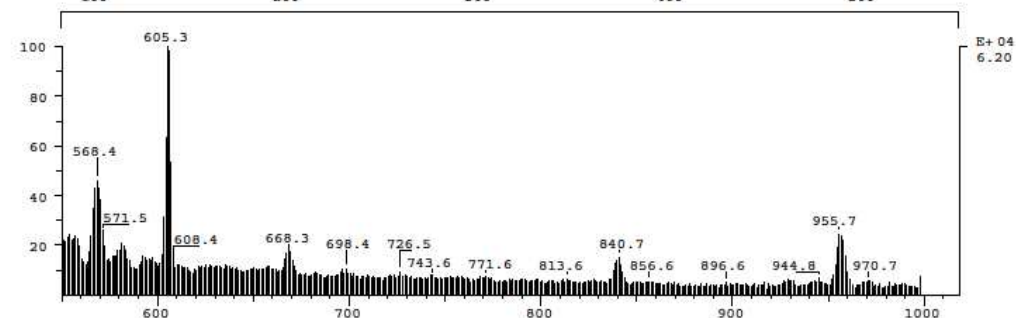

Figure S29. MS-FAB spectra of compound 22.

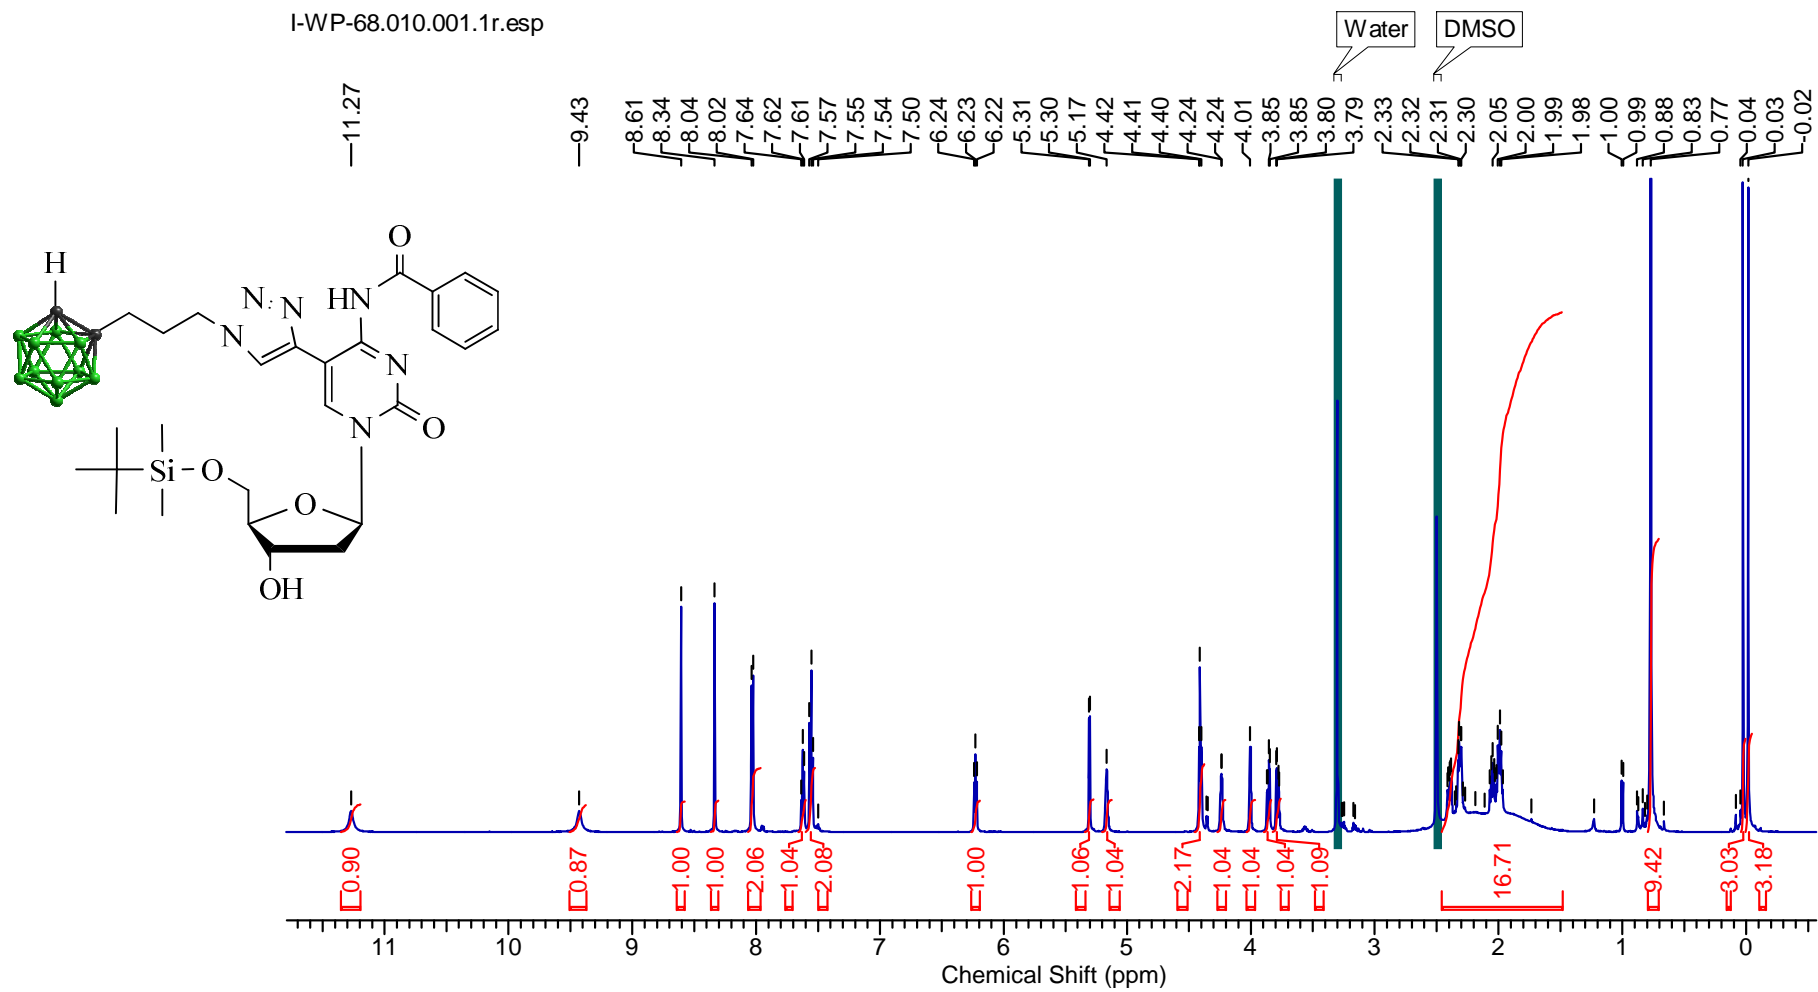

Figure S30.  $^1\text{H}$  NMR spectrum of compound 23.

I-WP-68.012.001.1r.esp

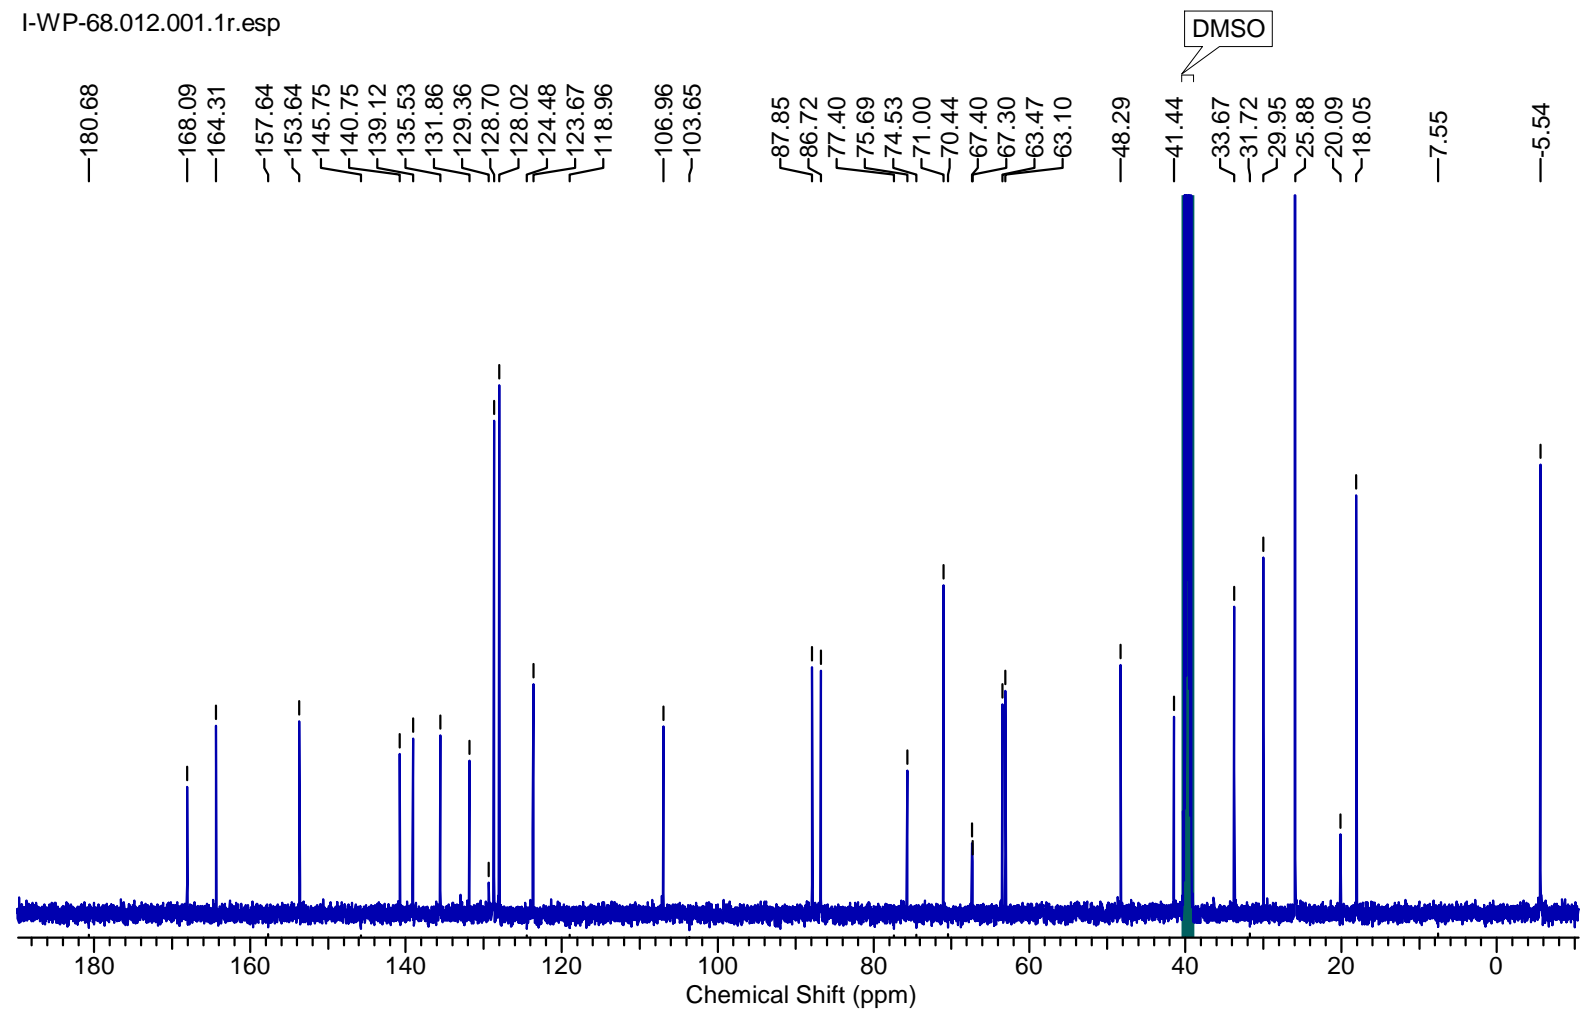

Figure S31.  $^{13}\text{C}$  NMR spectrum of compound **23**.

I-WP-68.001.001.1r.esp

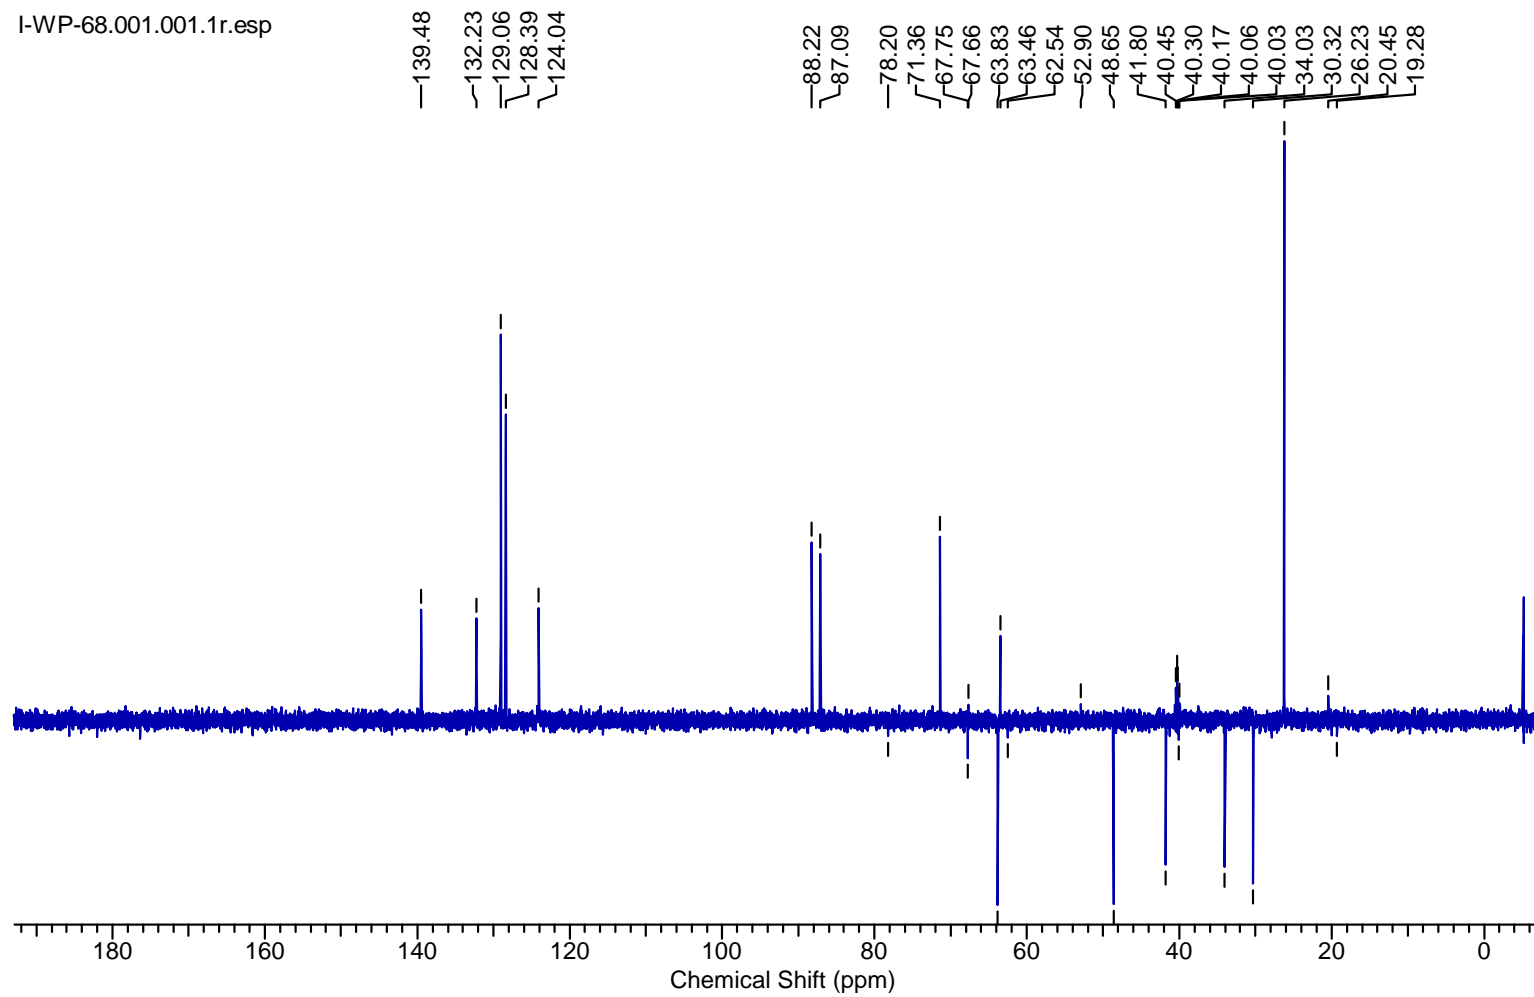

**Figure S32.** DEPT-135 spectrum of compound **23**.

I-WP-68.004.001.1r.esp

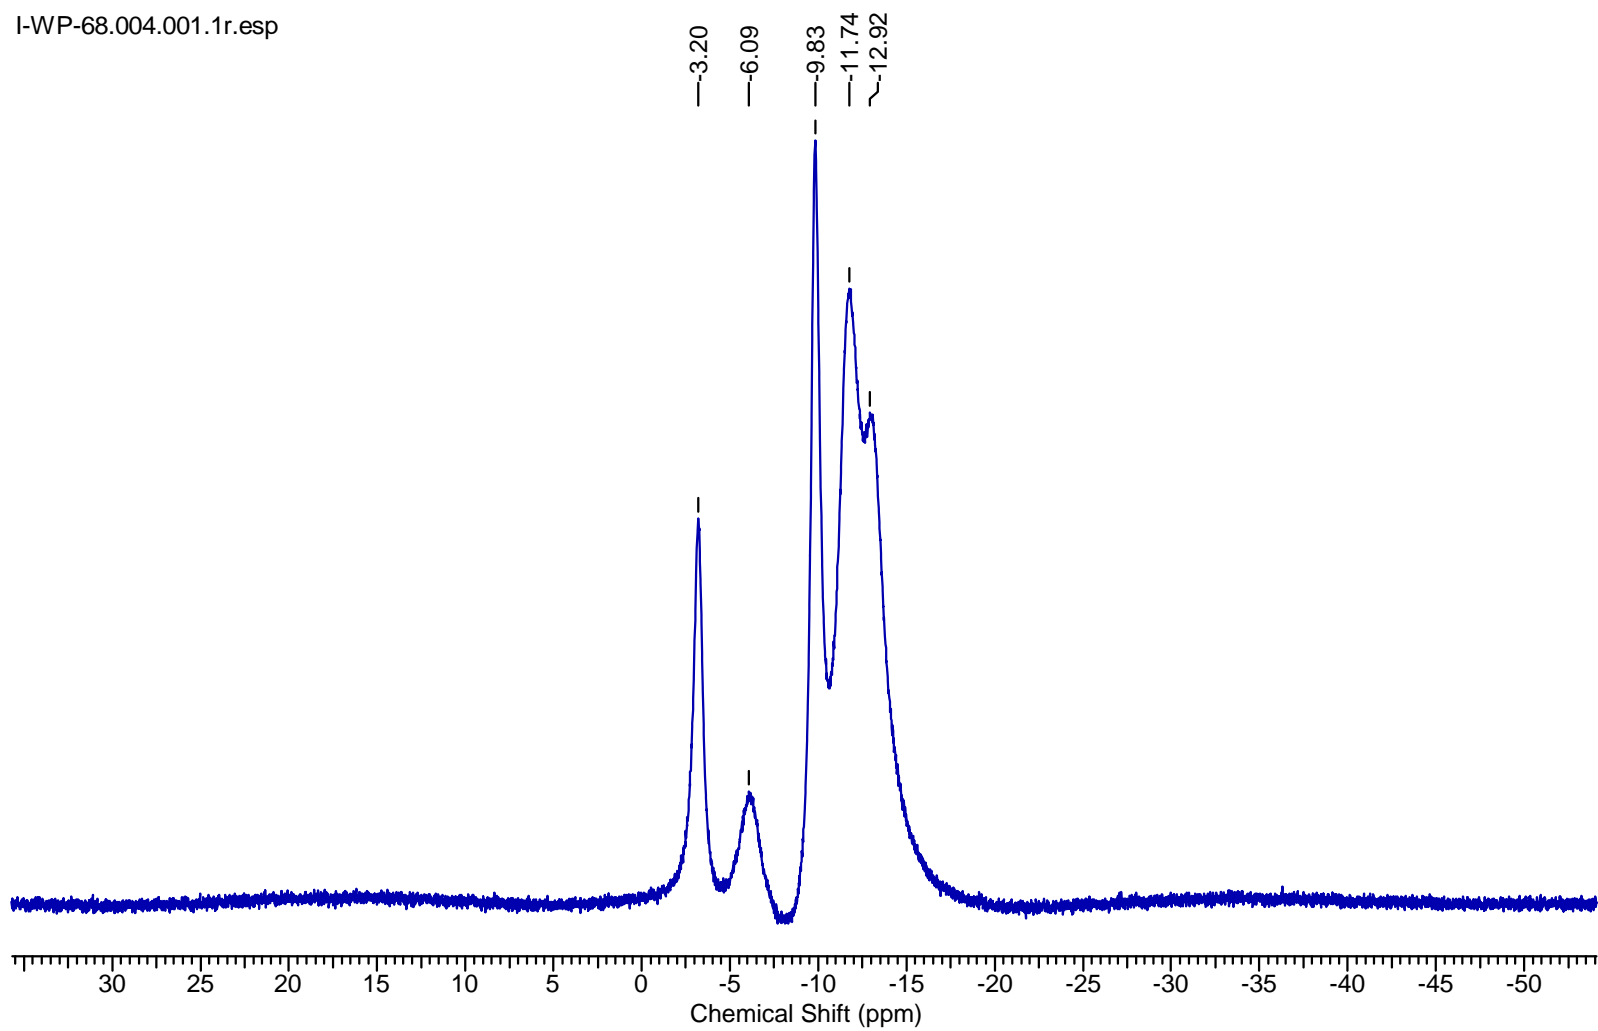

*Figure S33.*  $^{11}\text{B}$  {H BB} NMR spectrum of compound **23**.

I-WP-68.005.001.1r.esp

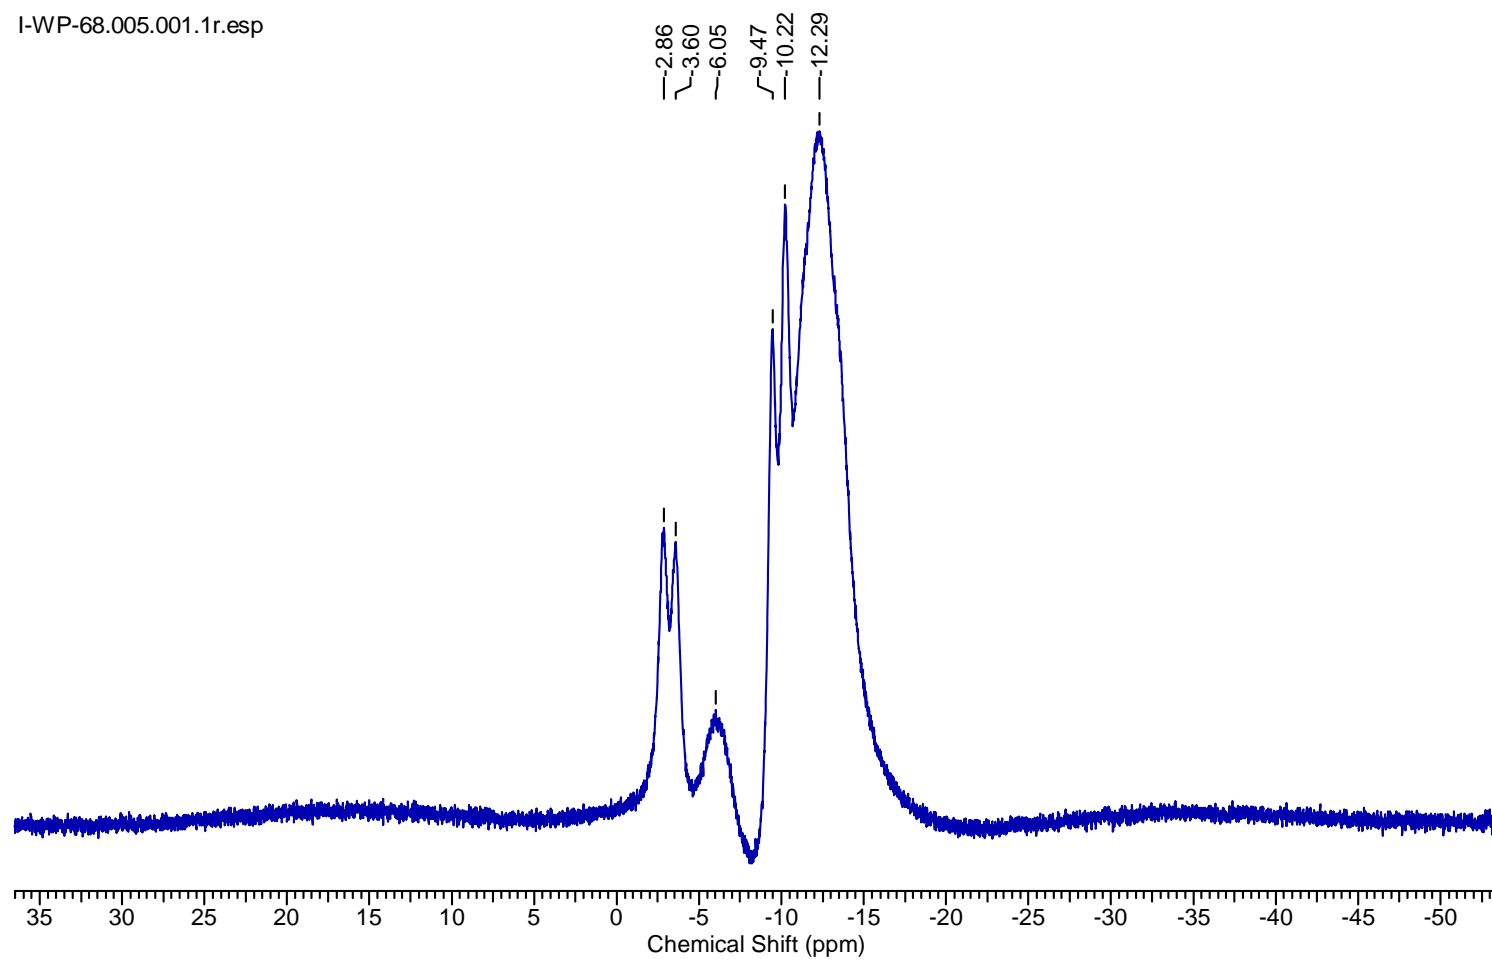

**Figure S34.**  $^{11}\text{B}$  NMR spectrum of compound **23**.

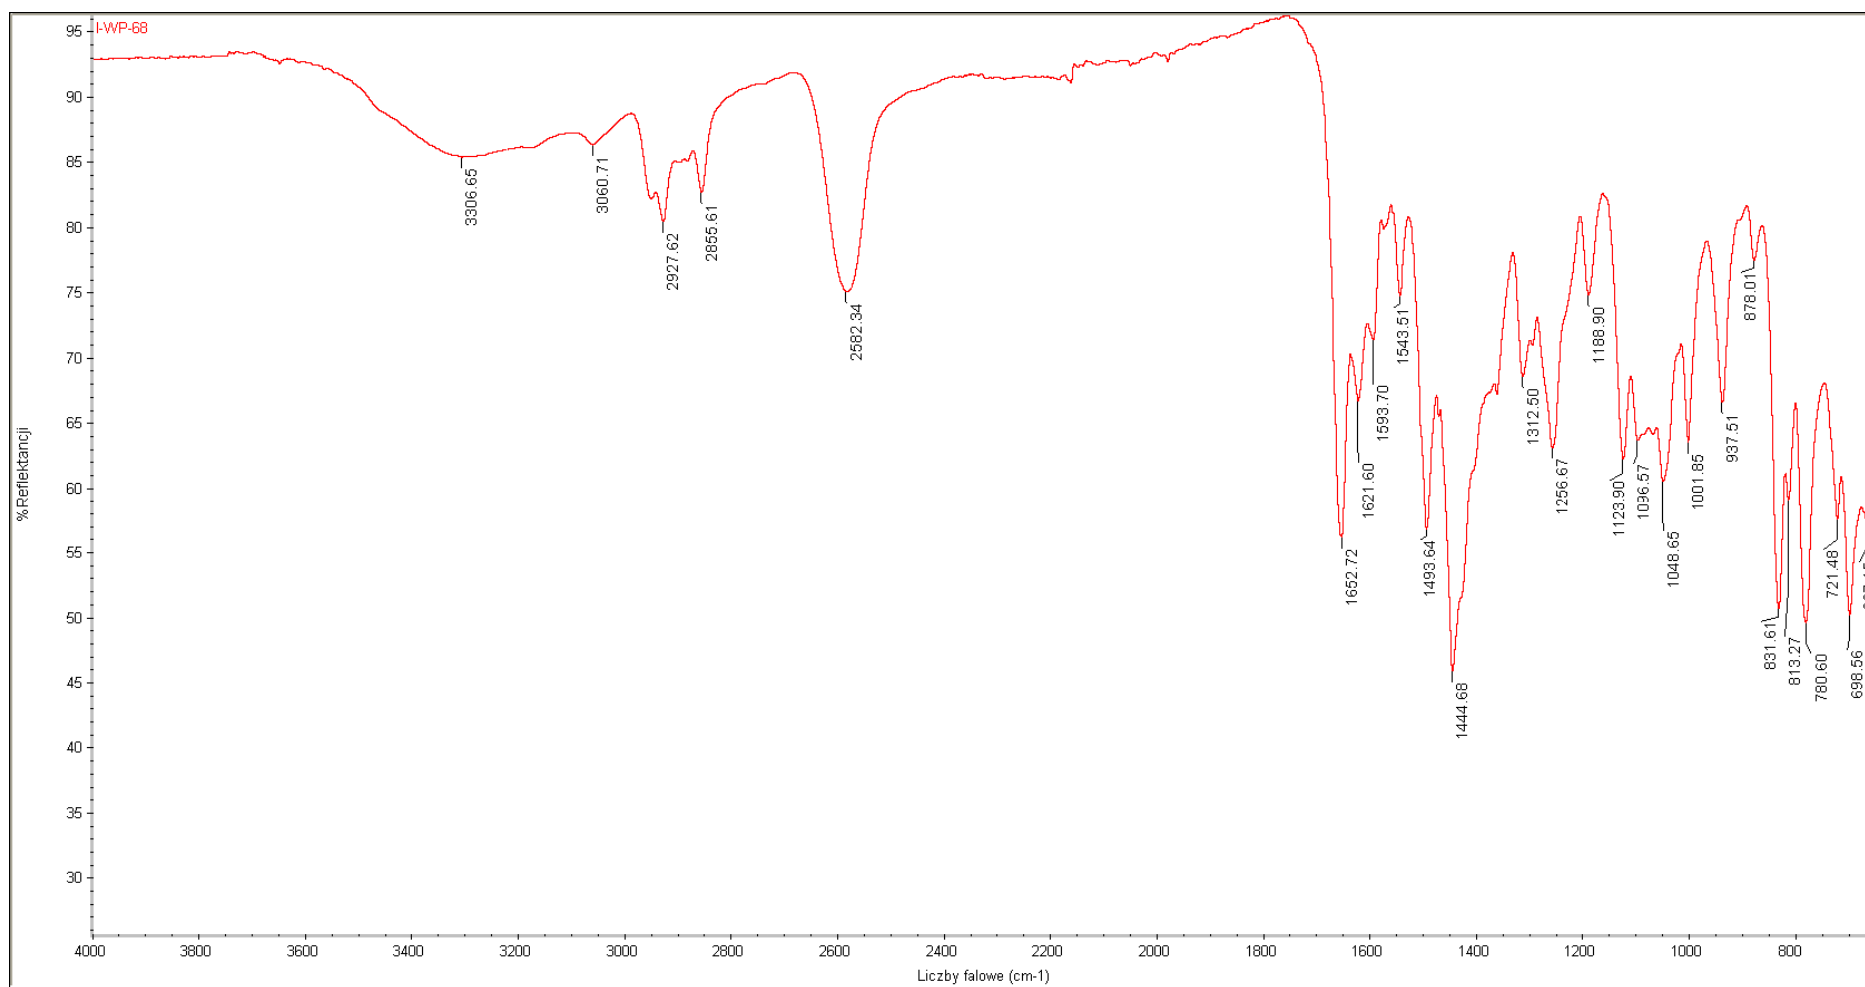

*Figure S35.* IR spectrum of compound **23**.

SPEC: az087ibm 26-Sep-13 REG : 00:16.9 #9  
 Samp: I-WP-68 Start : 10:09:54 10  
 Comm: LSI, Cs+ 13 keV, gly  
 Mode: FAB +VE +LMR BSCAN (EXP) UP LR NRM Study : MS CBMIM PAN Lodz  
 Oper: ub Client: IBM A.Olejniczak Inlet :  
 Base: 466.5 Inten : 925778 Masses: 100 > 1126  
 Norm: 466.5 RIC : 19781705 #peaks: 921  
 Peak: 1000.00 mmu  
 Data: +1>10

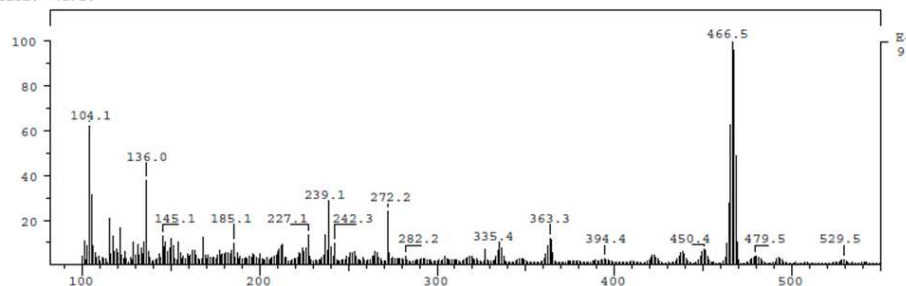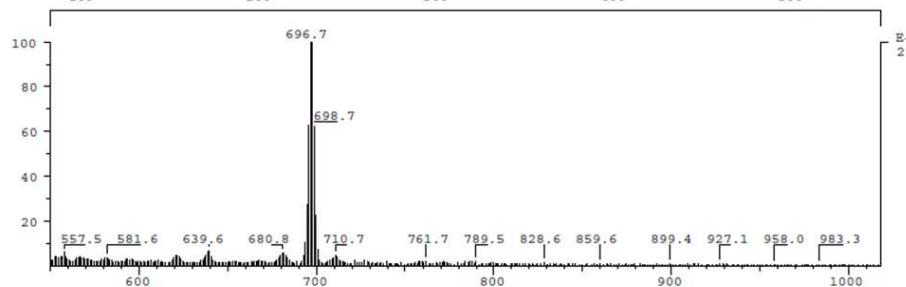

SPEC: az087ibm\_a 26-Sep-13 REG : 00:16.9 #9  
 Samp: I-WP-68 Start : 12:19:07 10  
 Comm: LSI, Cs+ 13 keV, gly  
 Mode: FAB -VE -LMR BSCAN (EXP) UP LR NRM Study : MS CBMIM PAN Lodz  
 Oper: ub Client: IBM A.Olejniczak Inlet :  
 Base: 695.4 Inten : 300395 Masses: 100 > 1131  
 Norm: 695.4 RIC : 10075266 #peaks: 946  
 Peak: 1000.00 mmu  
 Data: +1>10

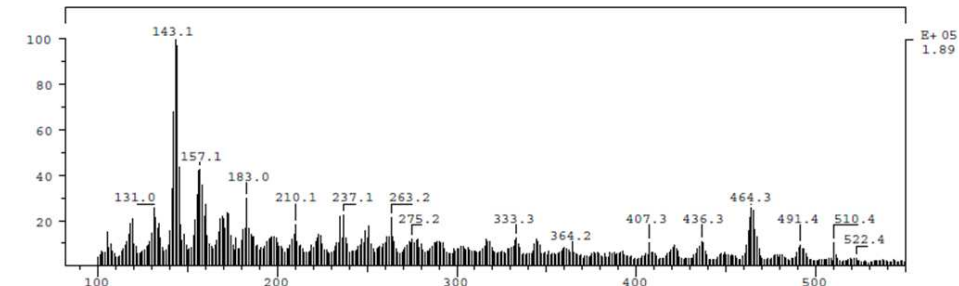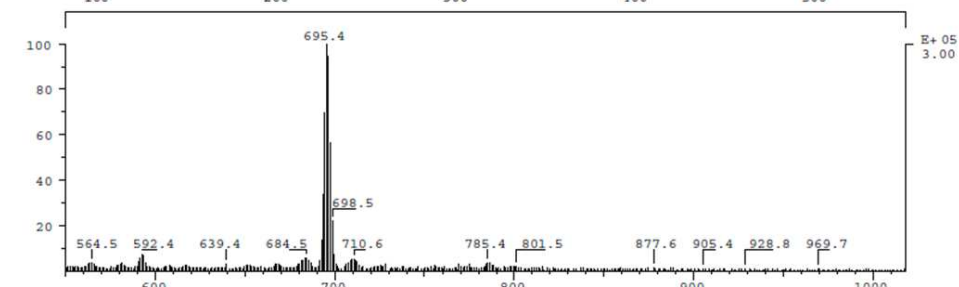

Figure S36. MS-FAB spectra of compound 23.



II-MM-amido-dc-aceton.010.001.1r.esp

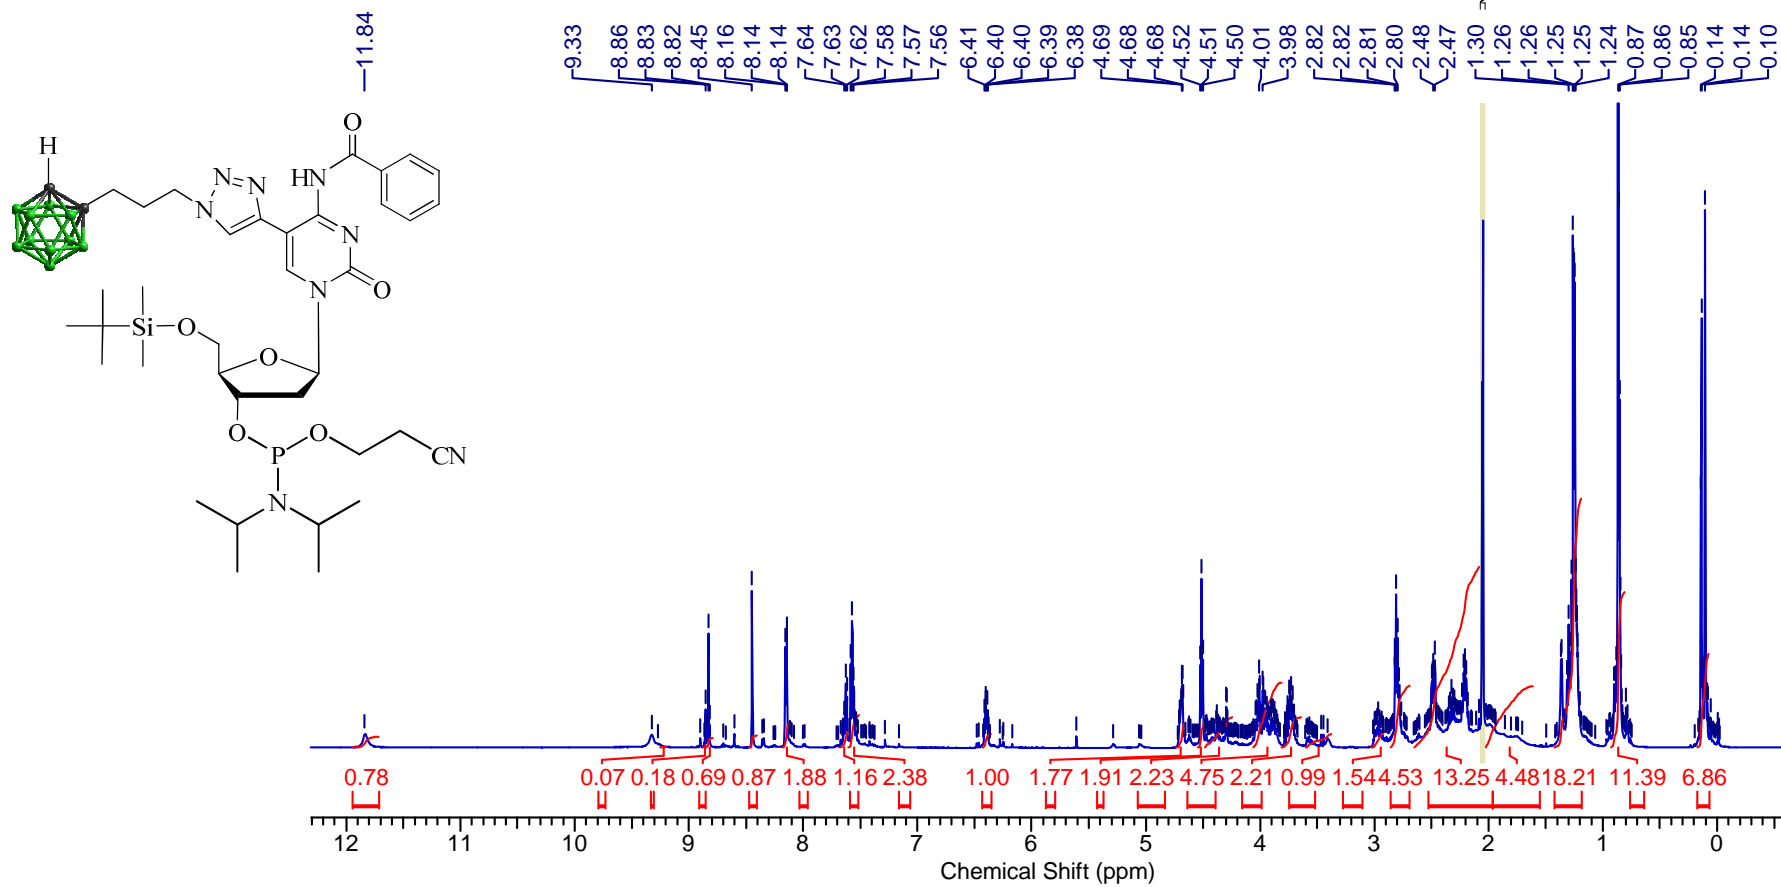

Figure S37. <sup>1</sup>H NMR spectrum of compound 30.

II-MM-amido-dc-aceton.012.001.1r.esp

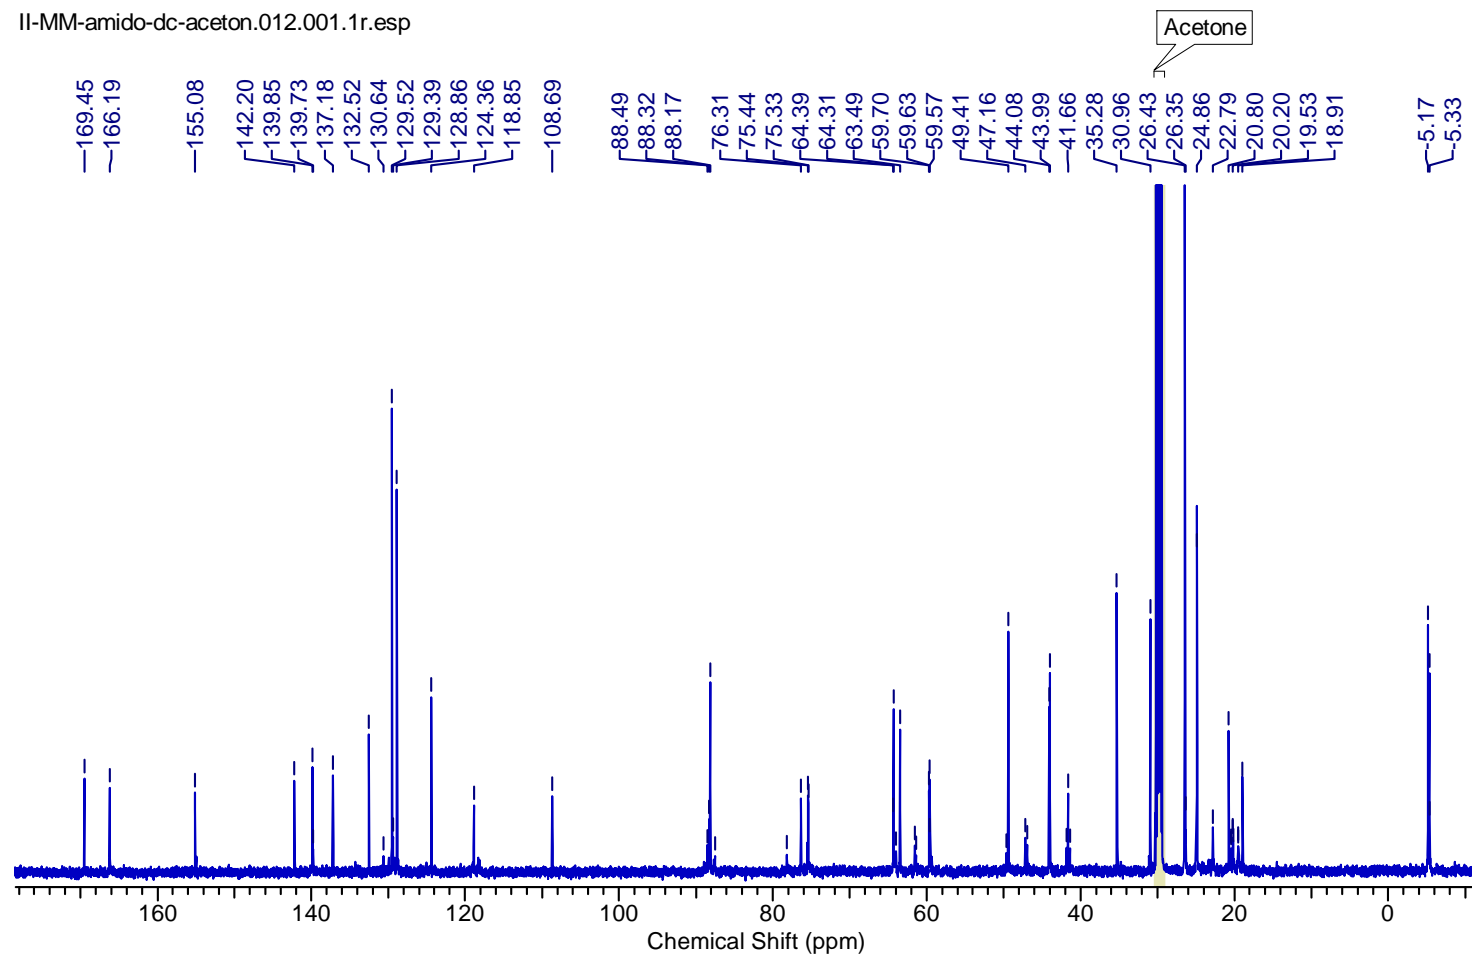

Figure S38.  $^{13}\text{C}$  NMR spectrum of compound 30.

II-MM-amido-dc-aceton.013.001.1r.esp

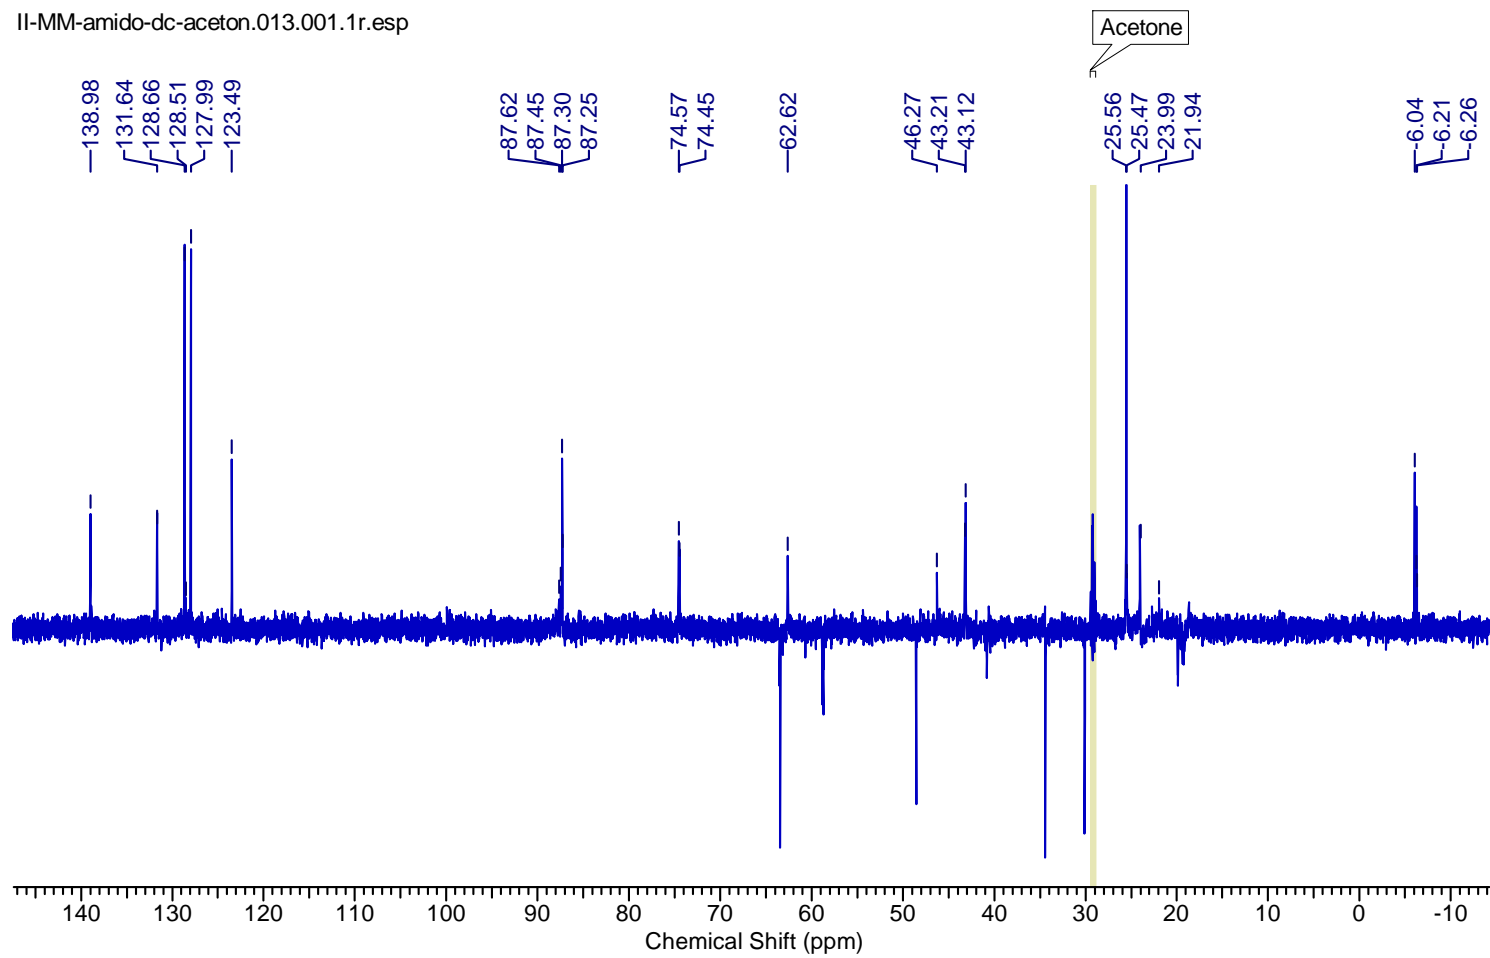

*Figure S39.* DEPT-135 spectrum of compound **30**.

II-MM-amido-dc-aceton.007.001.1r.esp

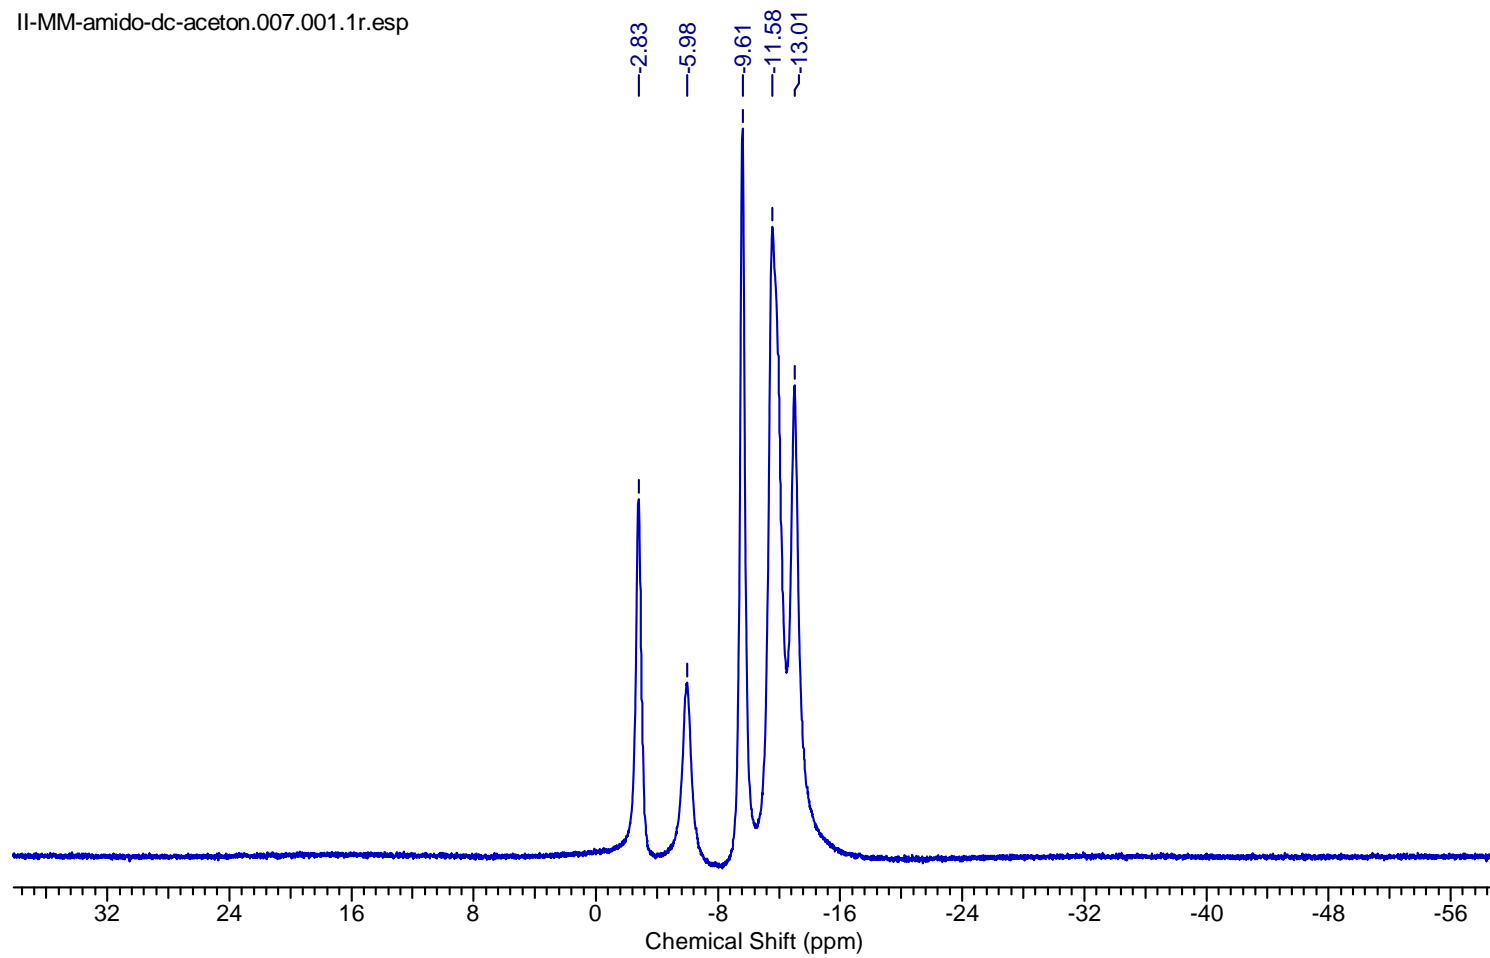

*Figure S40.*  $^{11}\text{B}\{\text{H BB}\}$  NMR spectrum of compound **30**.

II-MM-amido-dc-aceton.008.001.1r.esp

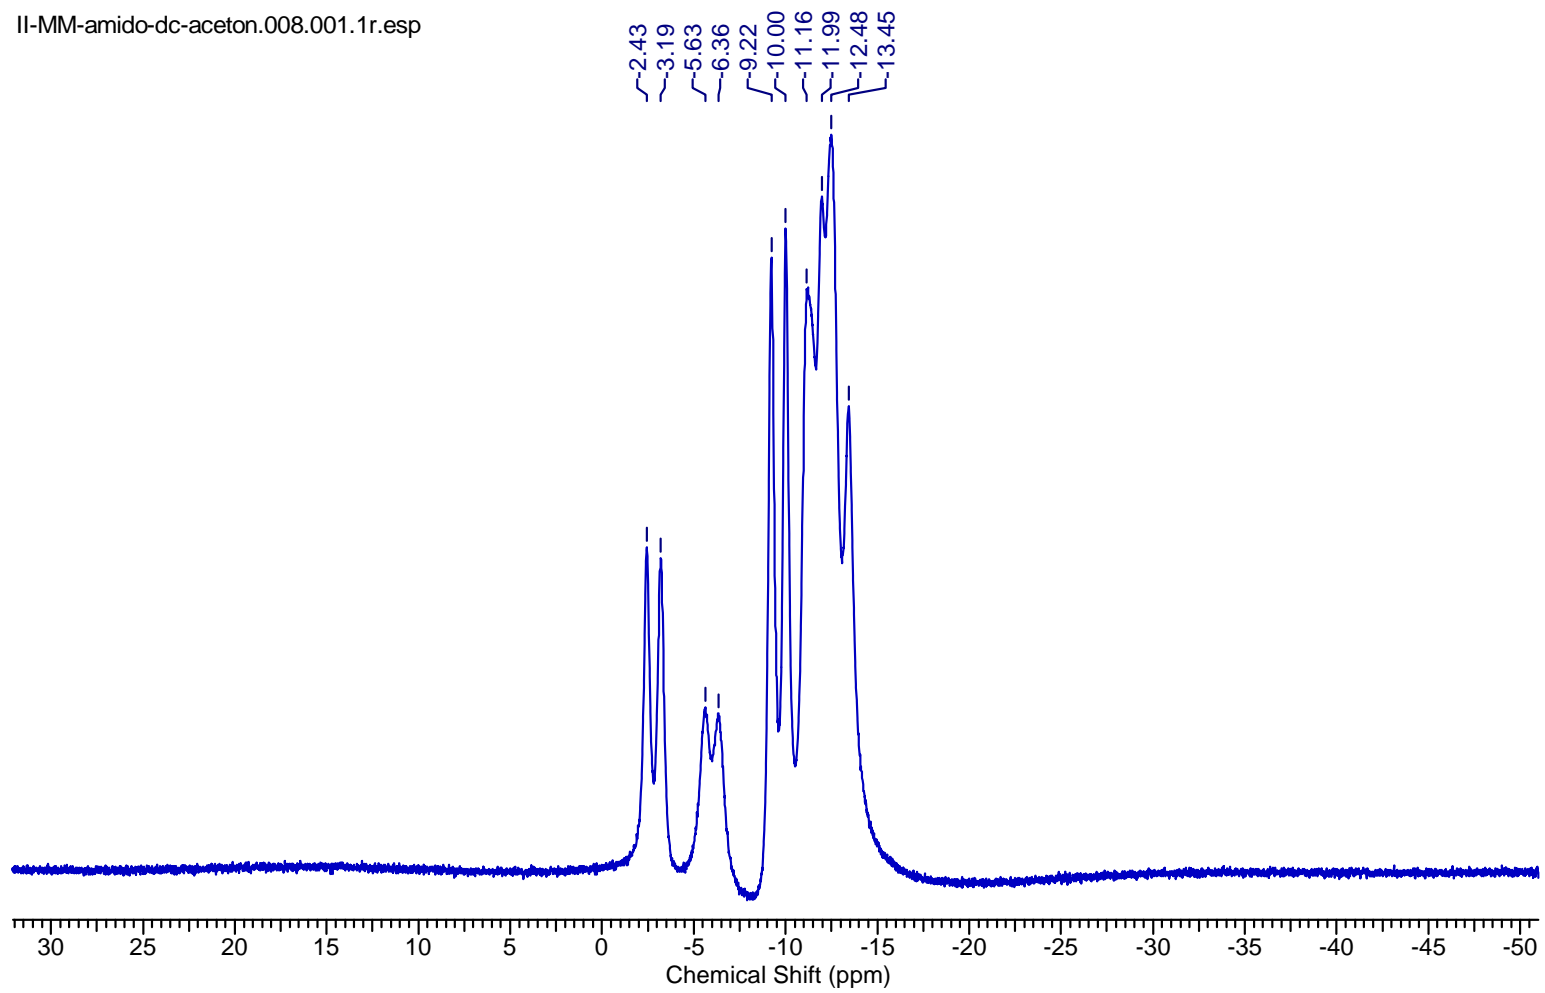

*Figure S41.*  $^{11}\text{B}$  NMR spectrum of compound **30**

II-MM-amido-dc-aceton.001.001.1r.esp

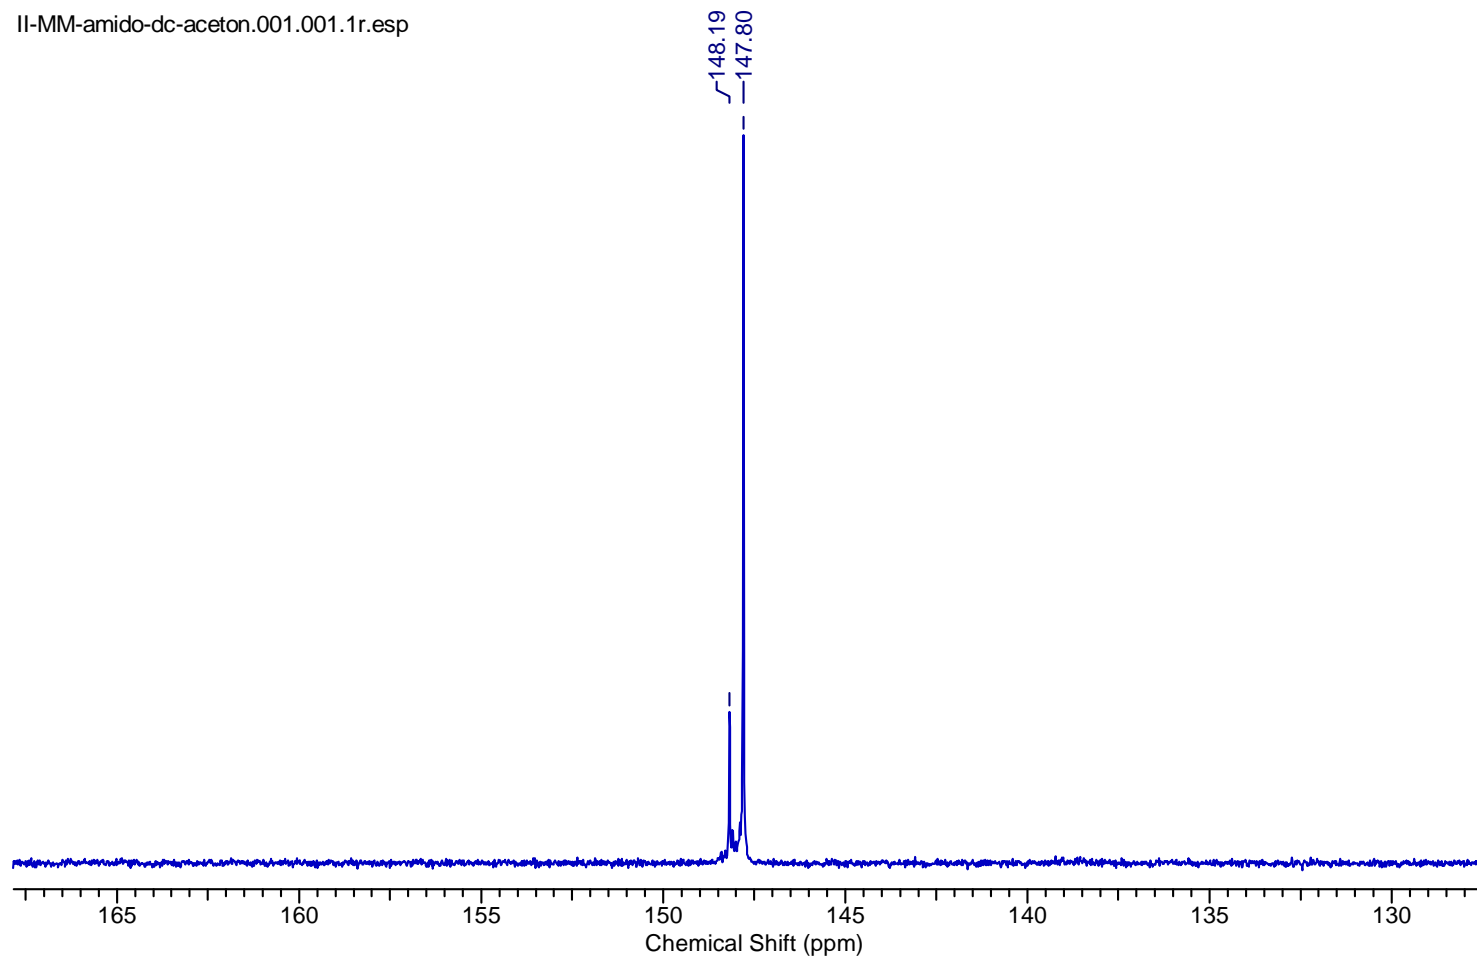

*Figure S42.*  $^{31}\text{P}$  NMR spectrum of compound **30**.

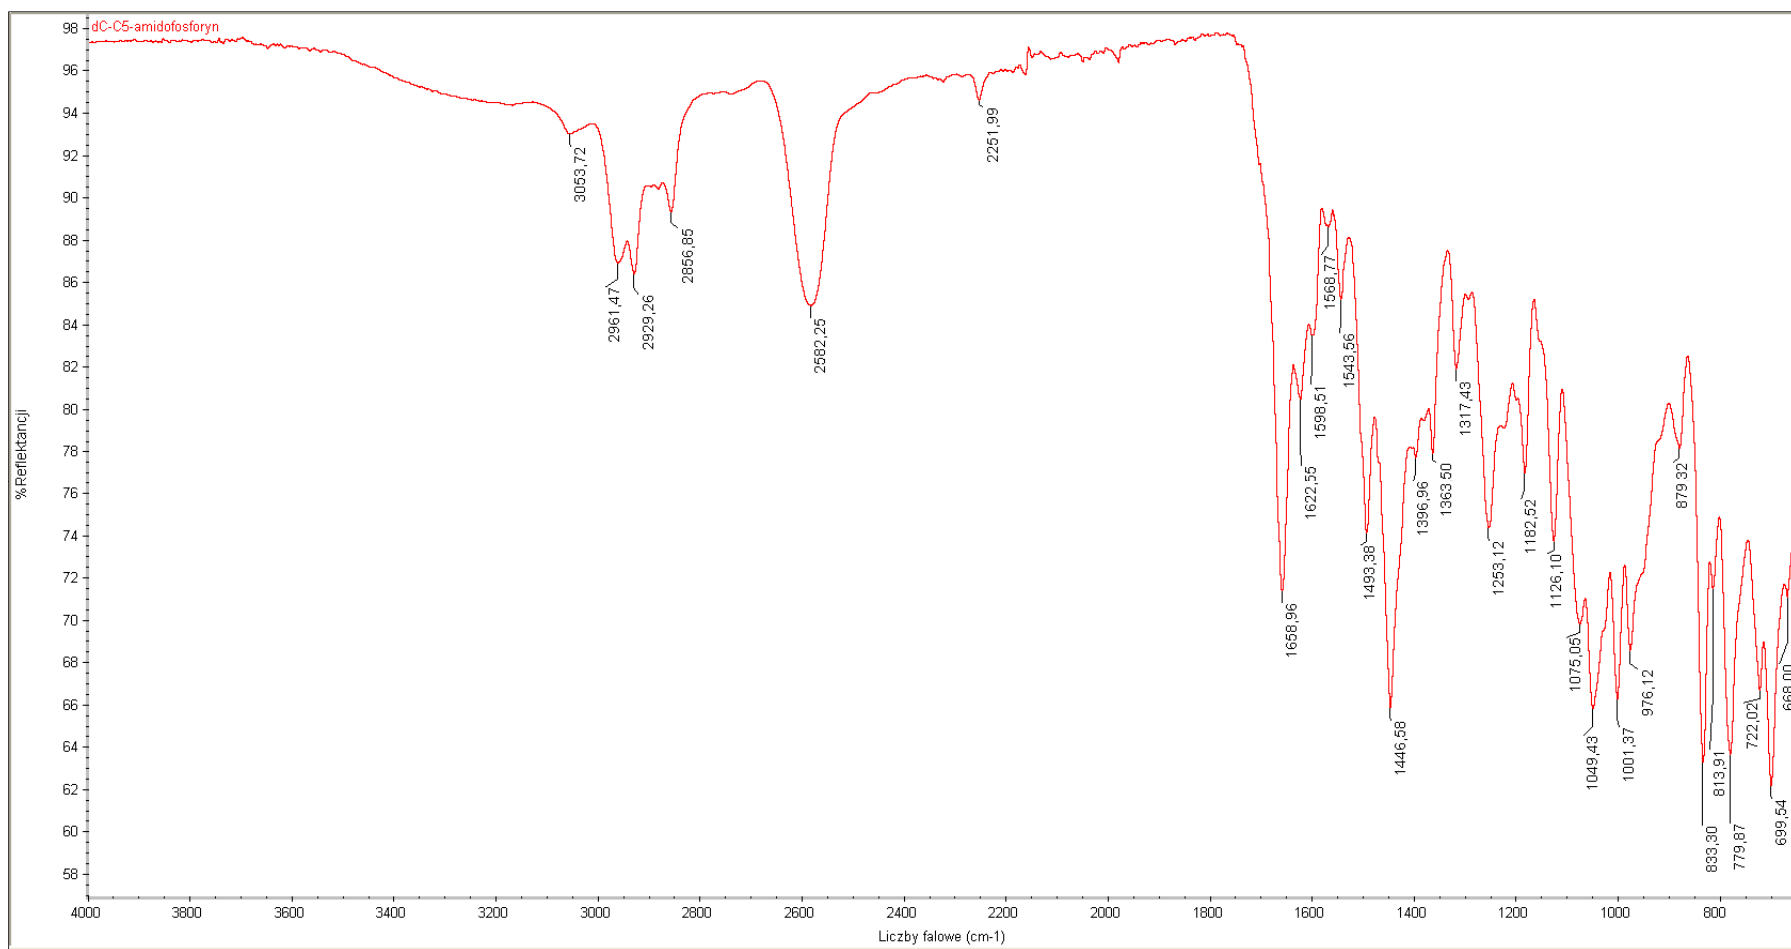

**Figure S43.** IR spectrum of compound **30**.

SPEC: az468ibm\_b 23-Dec-13 REG : 00:16.9 #9  
Samp: dC-amido Start : 11:22:01 10  
Comm: LSI, Cs+ 13 keV, nba  
Mode: FAB -VE -LMR BSCAN (EXP) UP LR NRM Study : MS CBMiM PAN Lodz  
Oper: ew Client: IBM A.Olejniczak Inlet :  
Base: 153.0 Inten : 2571237 Masses: 100 > 1117  
Norm: 153.0 RIC : 19825290 #peaks: 1008  
Peak: 1000.00 mmu  
Data: +1>10

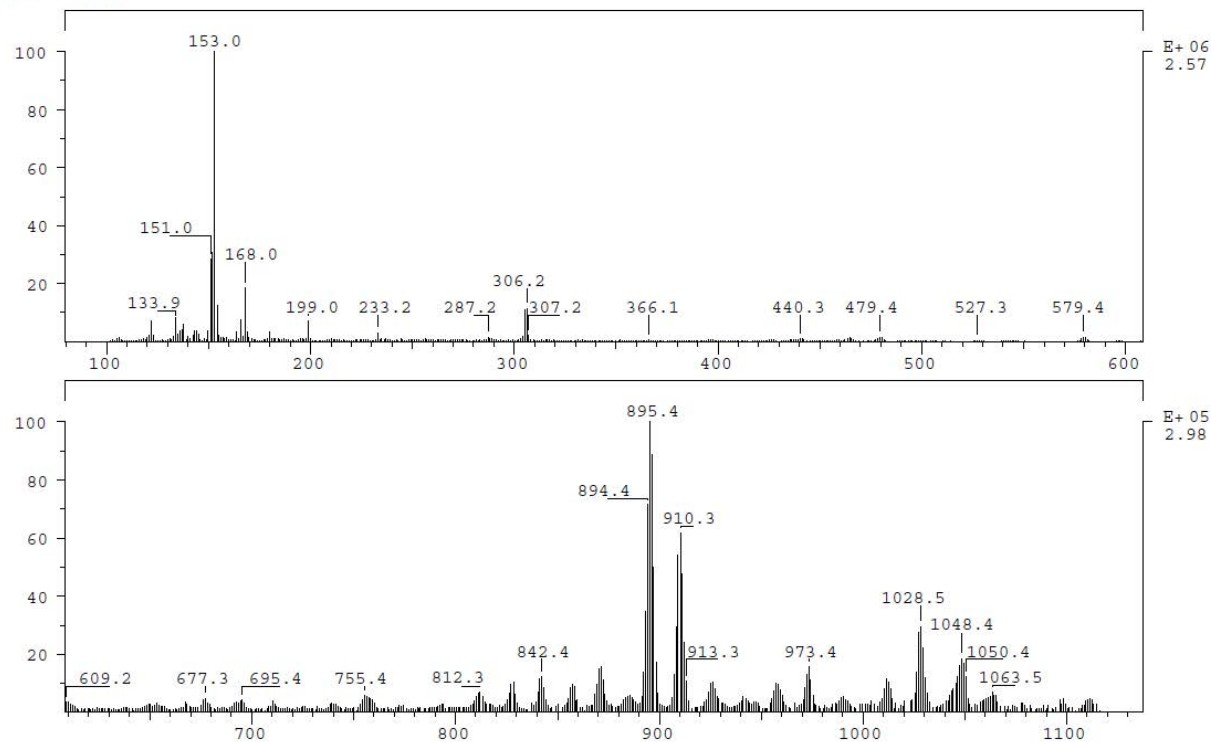

**Figure S44.** MS-FAB spectrum of compound 30.



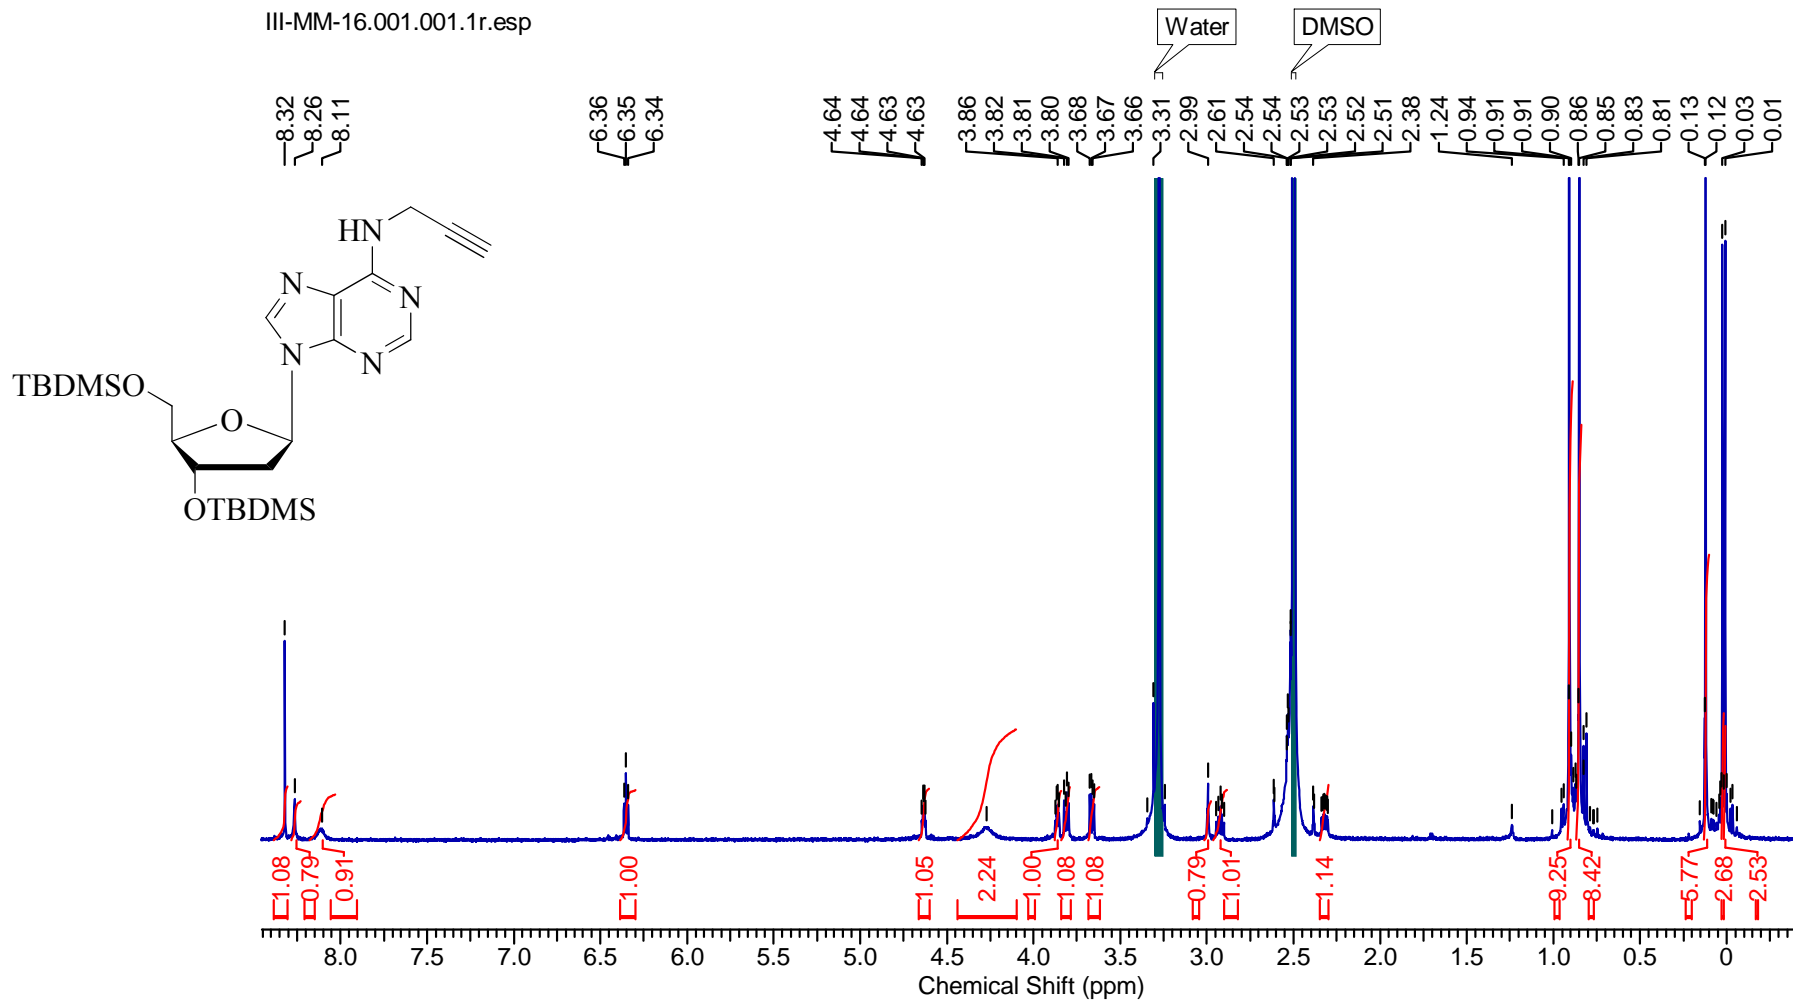

Figure S45.  $^1\text{H}$  NMR spectrum of compound 12.

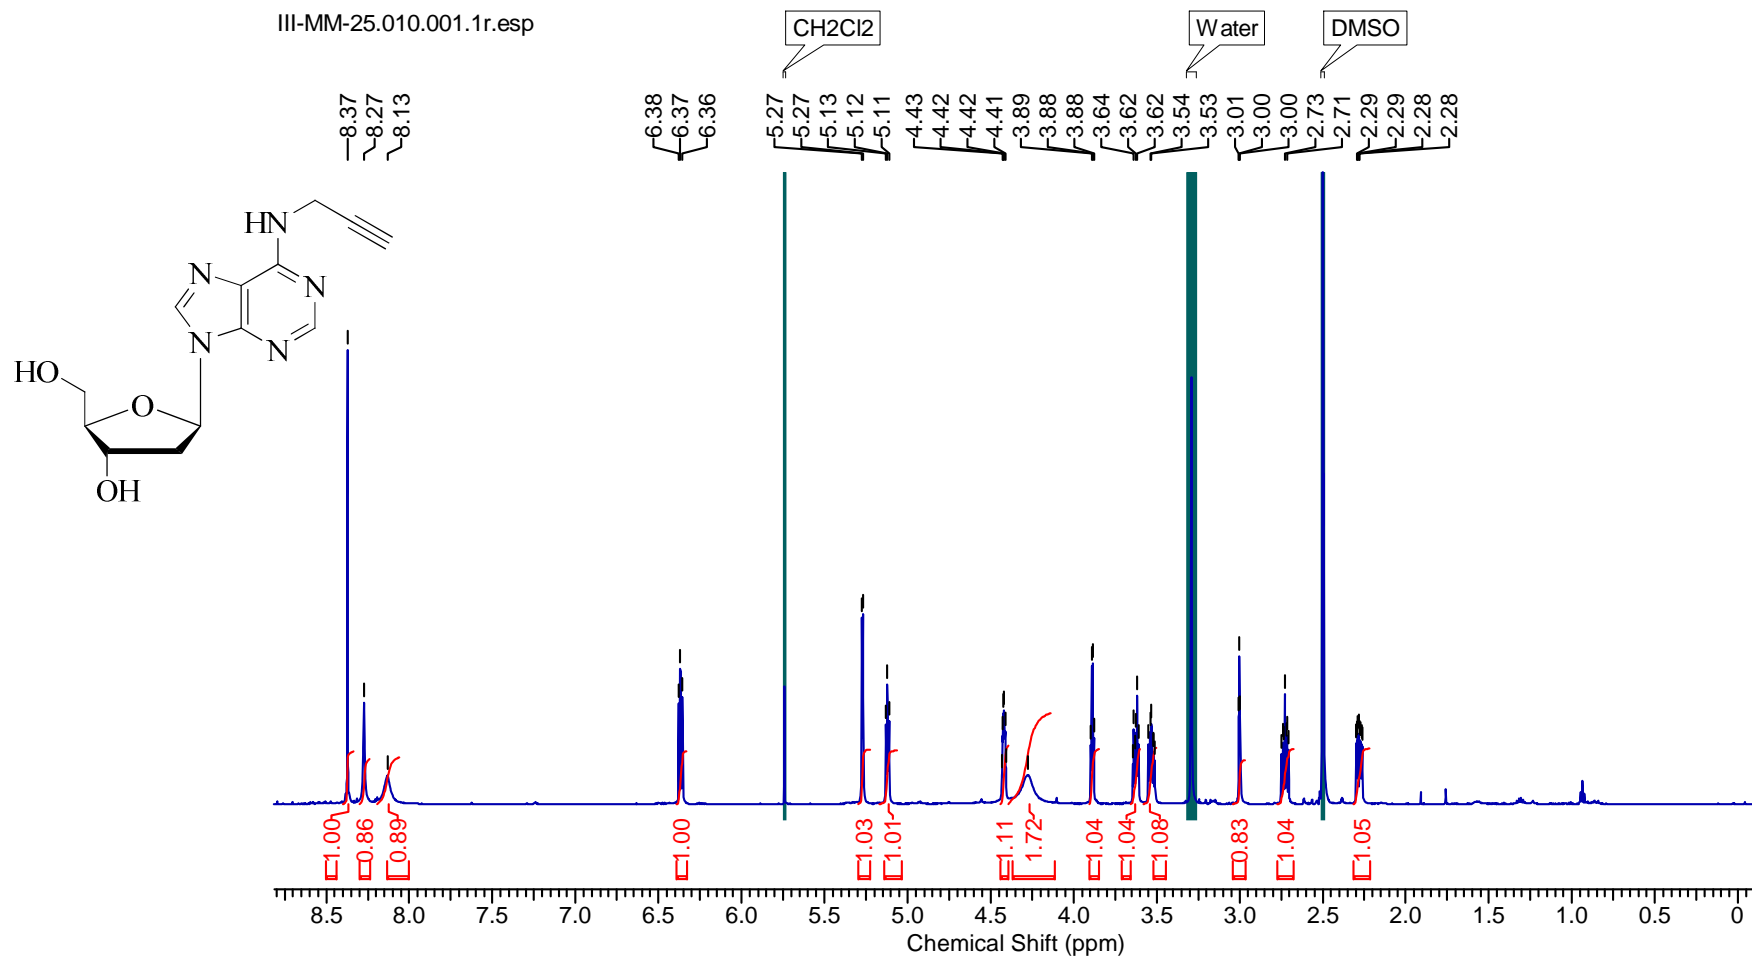

Figure S46.  $^1\text{H}$  NMR spectrum of compound 13.

III-MM-40.011.001.1r.esp

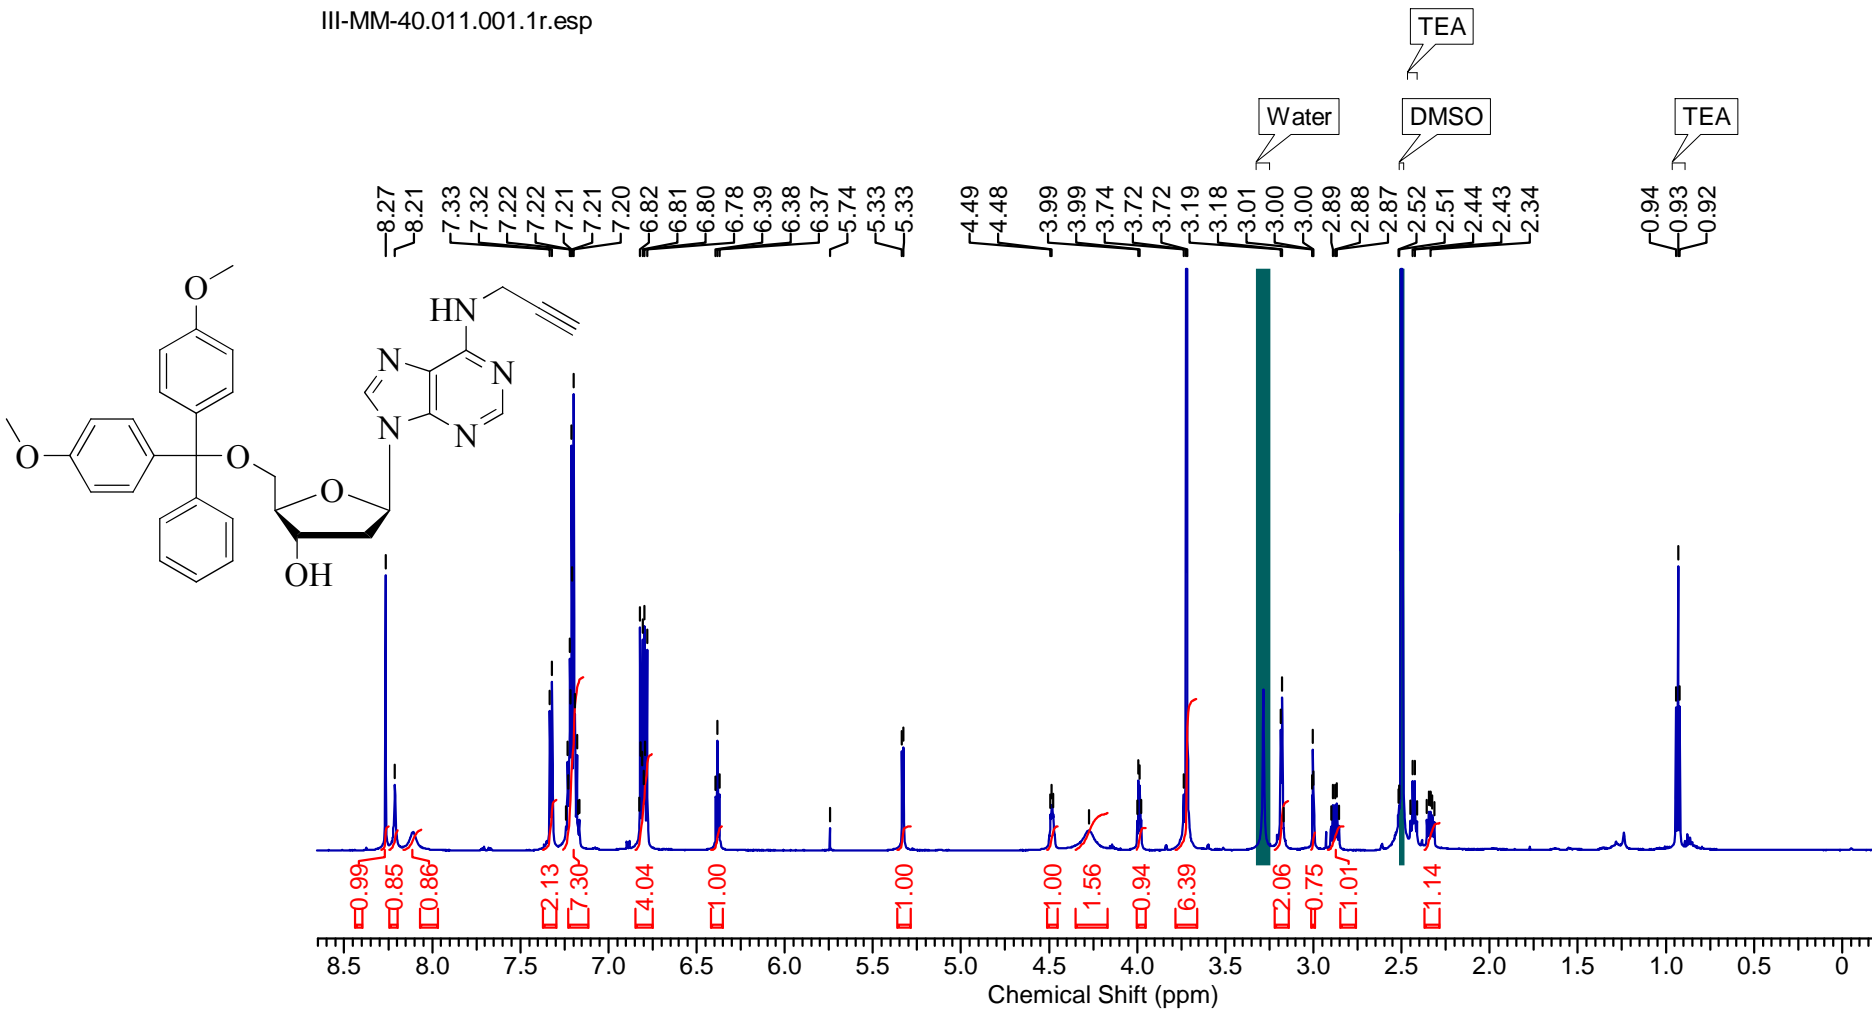

Figure S47.  $^1\text{H}$  NMR spectrum of compound 14.

III-MM-40.020.001.1r.esp

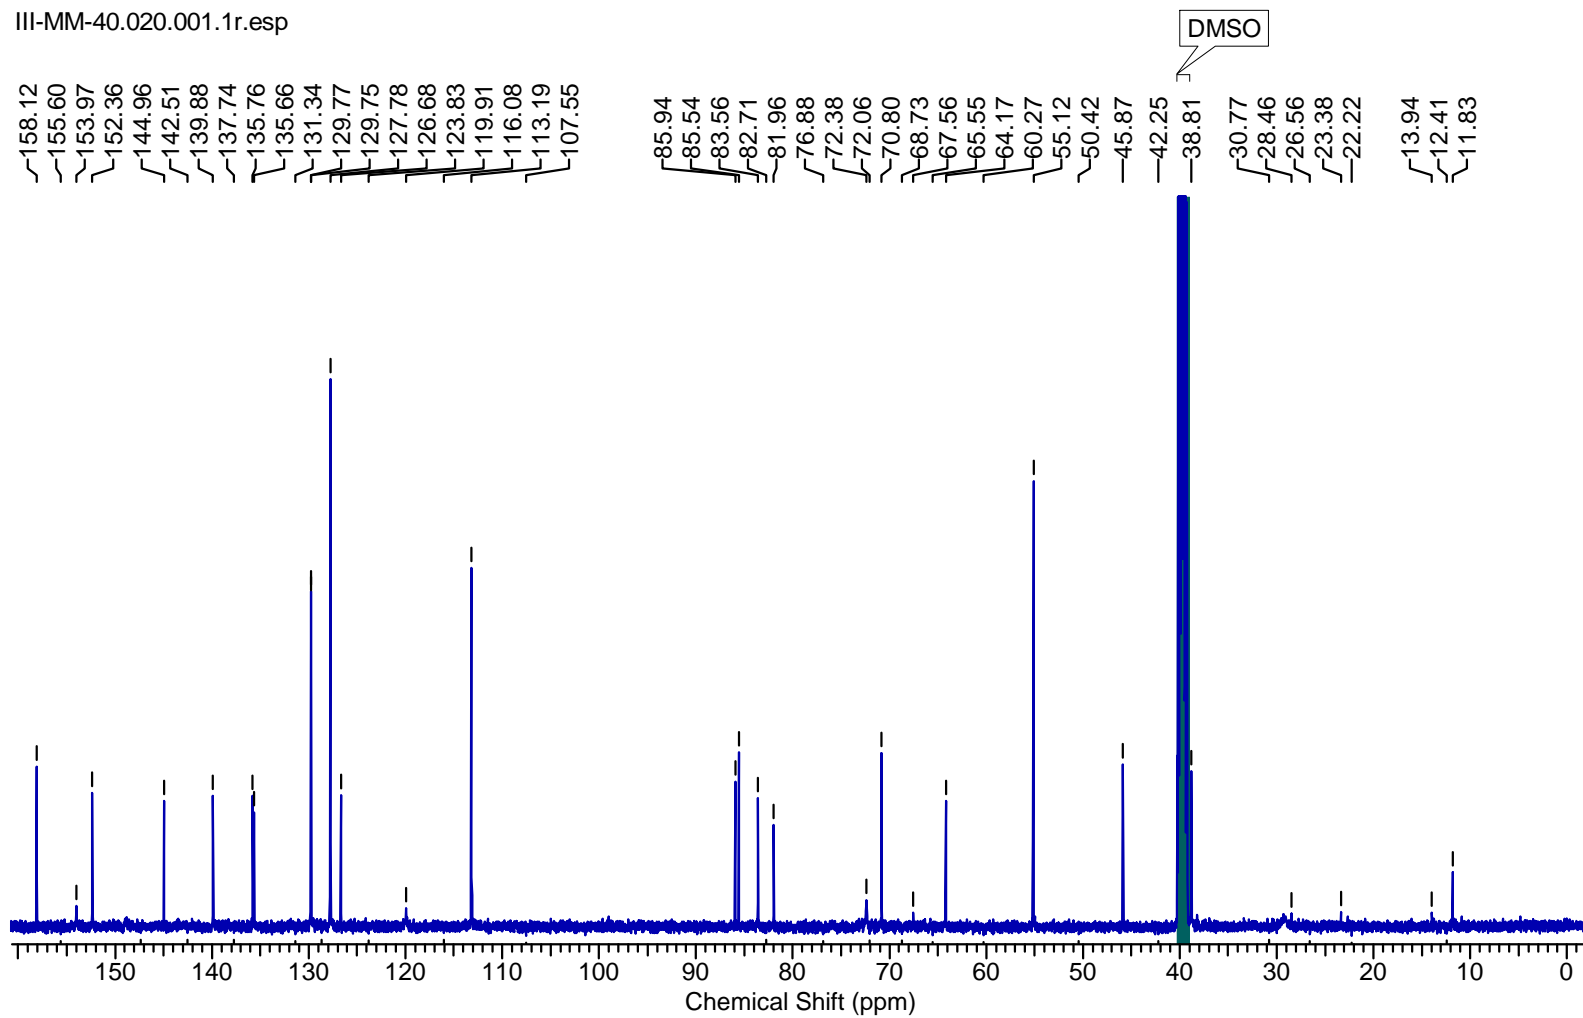

Figure S48.  $^{13}\text{C}$  NMR spectrum of compound 14.

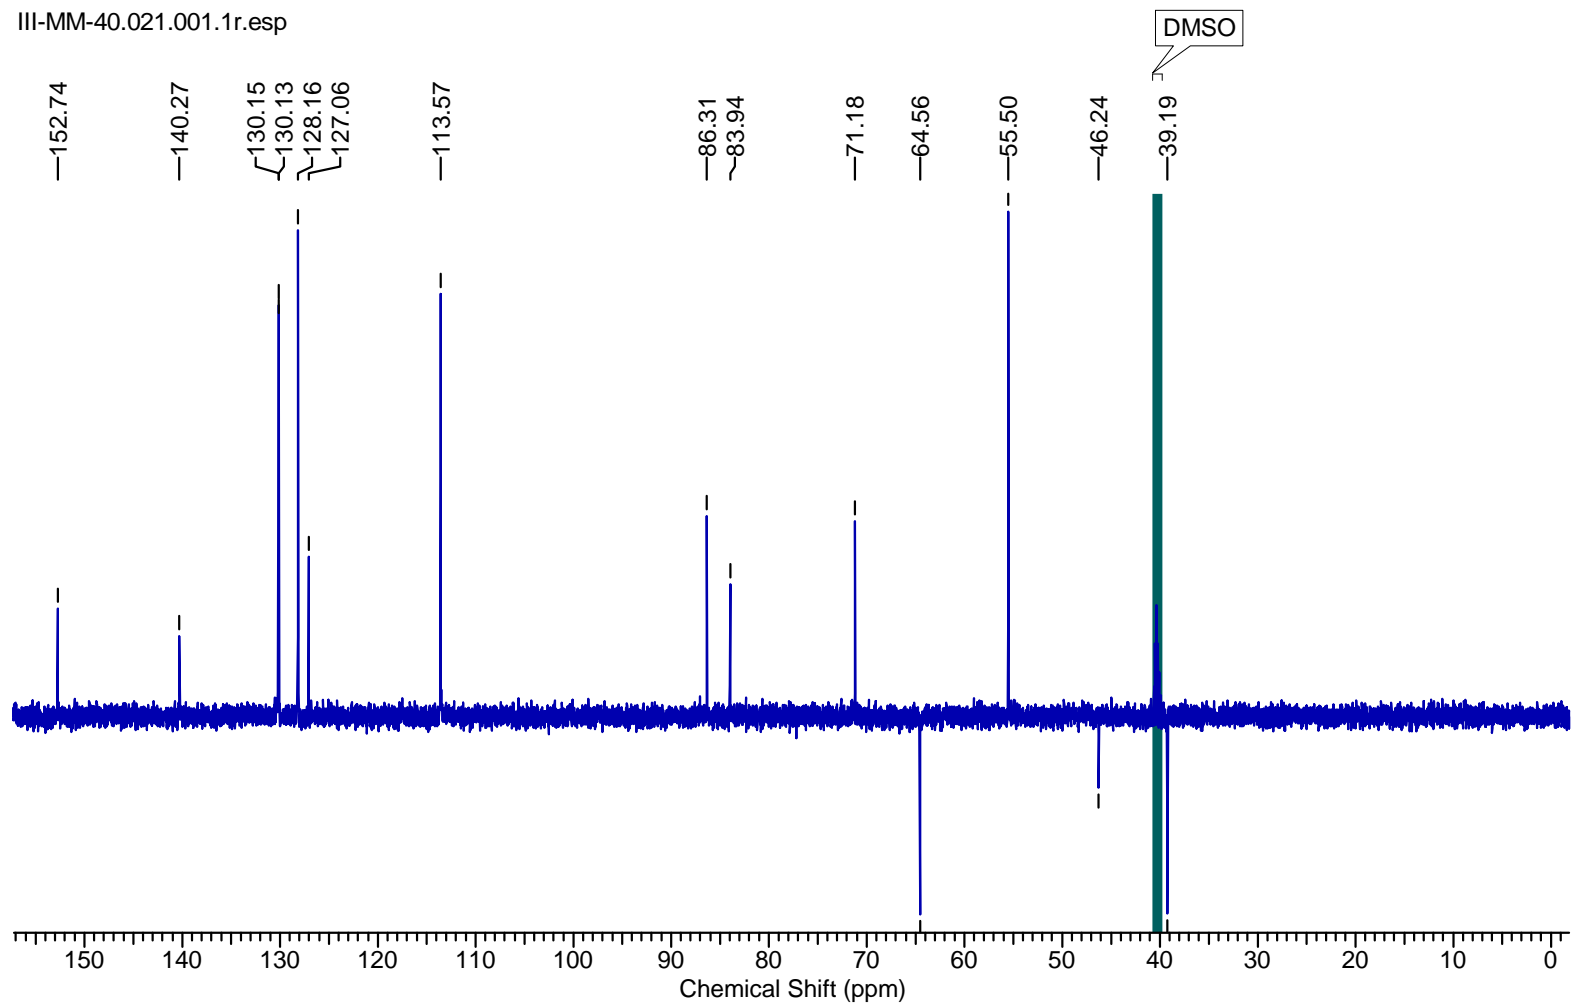

**Figure S49.** DEPT-135 spectrum of compound **14**.

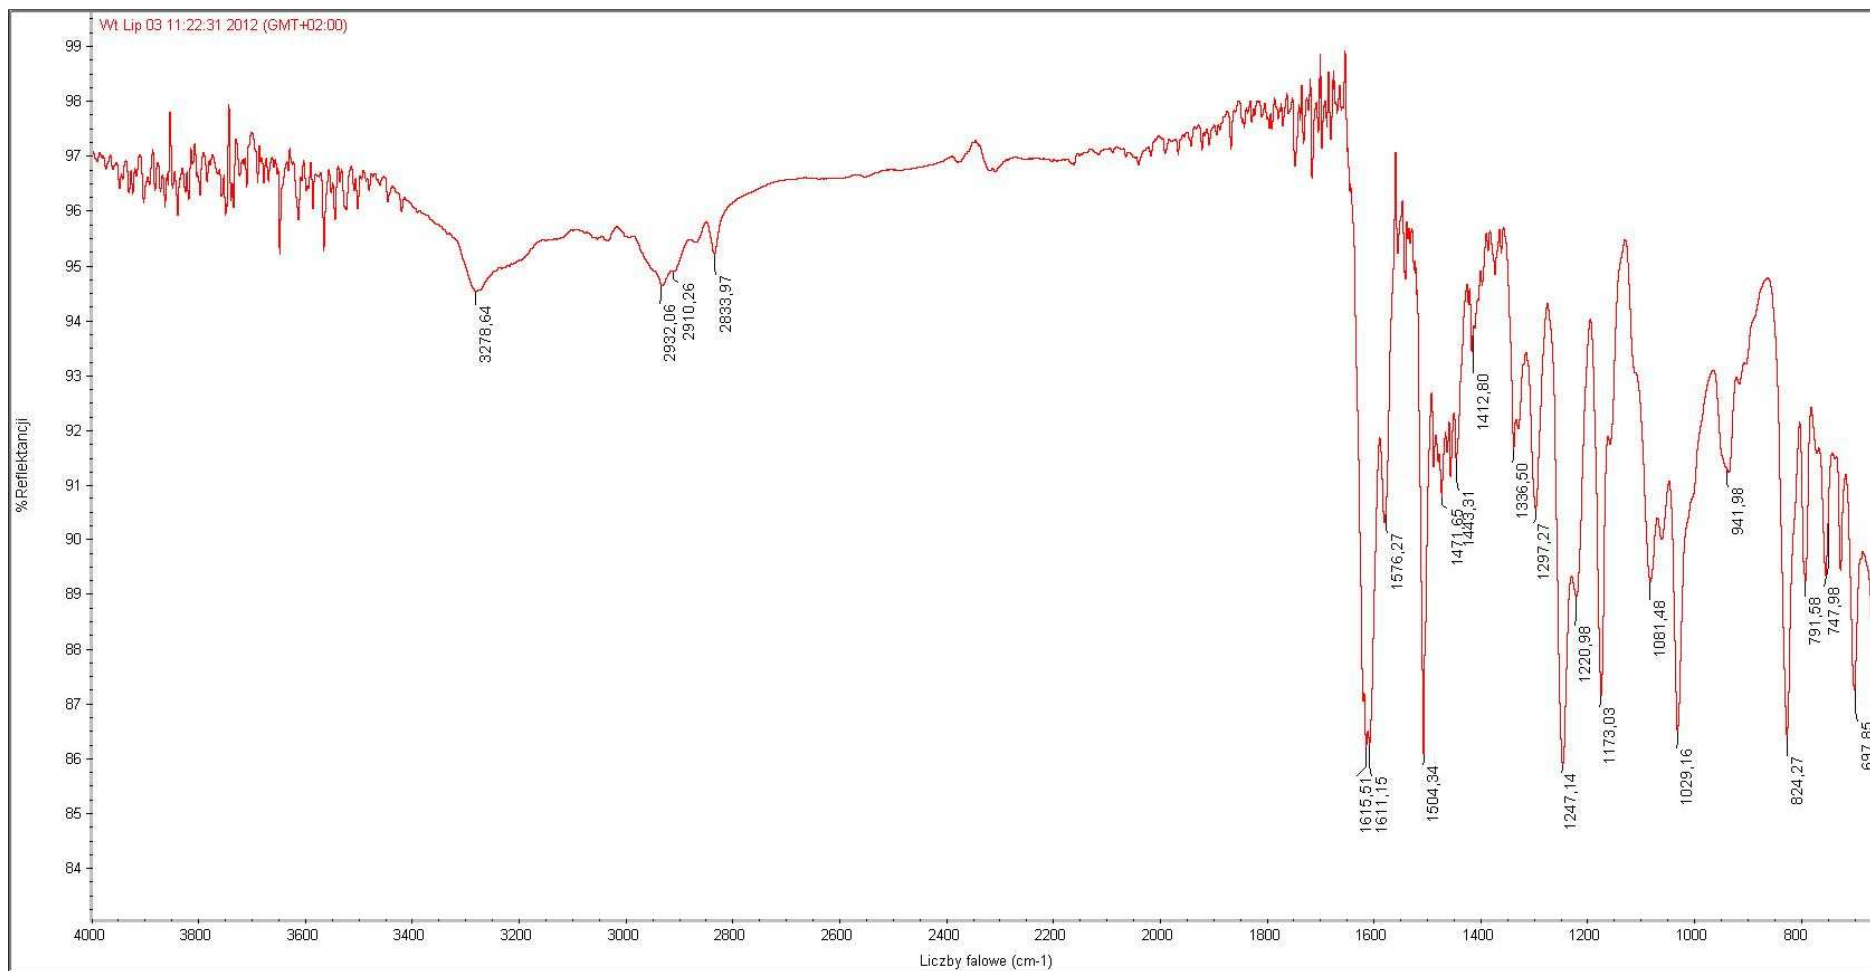

**Figure S50.** IR spectrum of compound **14**.

SPEC: ax6611bm\_a                    27-Jun-12    REG : 00:16.4    #9  
 Samp: III-MM-40                    Start : 13:46:07    10  
 Comm: LSI, Cs+ 13 keV, nba  
 Mode: FAB +VE +LMR BSCAN (EXP) UP LR NRM                    Study : MS CBMIM PAN Lodz  
 Oper: ed                    Client: IBM A.Olejniczak                    Inlet :  
 Base: 303.2                    Inten : 4635556                    Masses: 100 > 1000  
 Norm: 303.2                    RIC : 28939076                    #peaks: 819  
 Peak: 1000.00 mmu  
 Data: +1>10

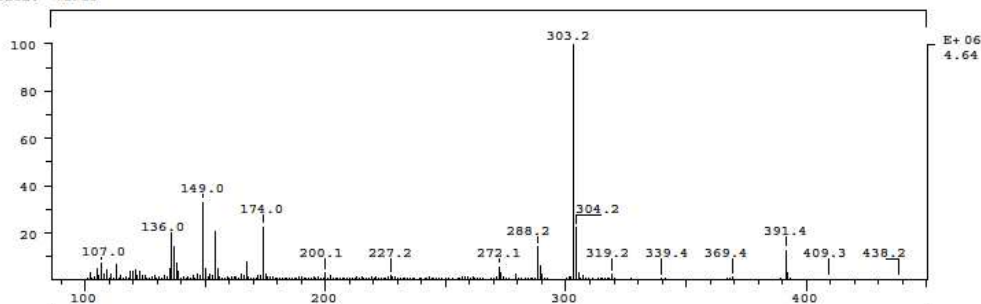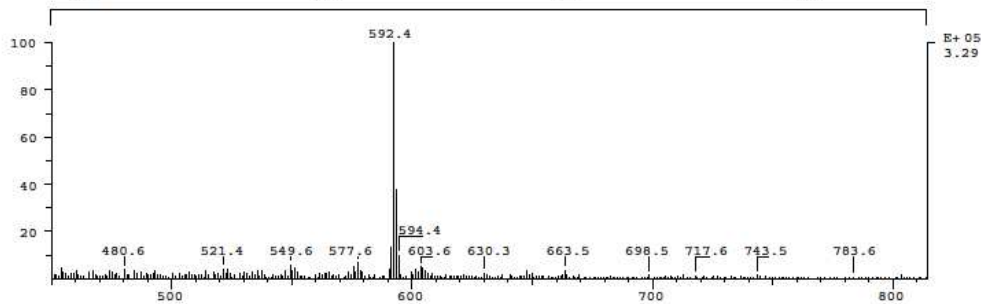

SPEC: ax6611bm                    27-Jun-12    REG : 00:16.4    #9  
 Samp: III-MM-40                    Start : 13:42:19    10  
 Comm: LSI, Cs+ 13 keV, nba  
 Mode: FAB -VE -LMR BSCAN (EXP) UP LR NRM                    Study : MS CBMIM PAN Lodz  
 Oper: ed                    Client: IBM A.Olejniczak                    Inlet :  
 Base: 152.9                    Inten : 946679                    Masses: 100 > 1000  
 Norm: 152.9                    RIC : 7047203                    #peaks: 728  
 Peak: 1000.00 mmu  
 Data: +1>10

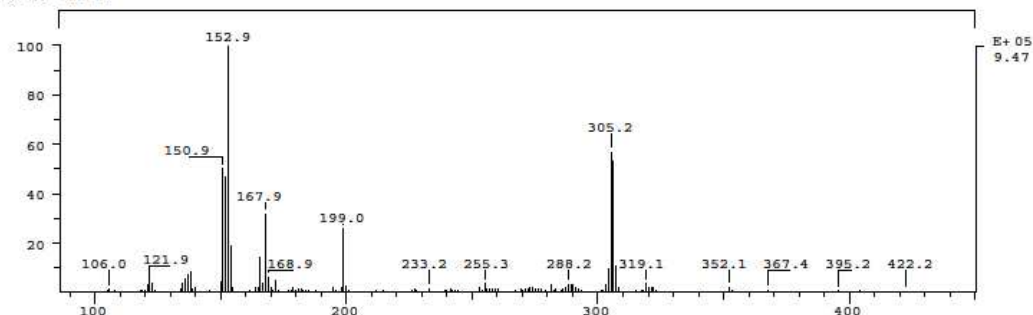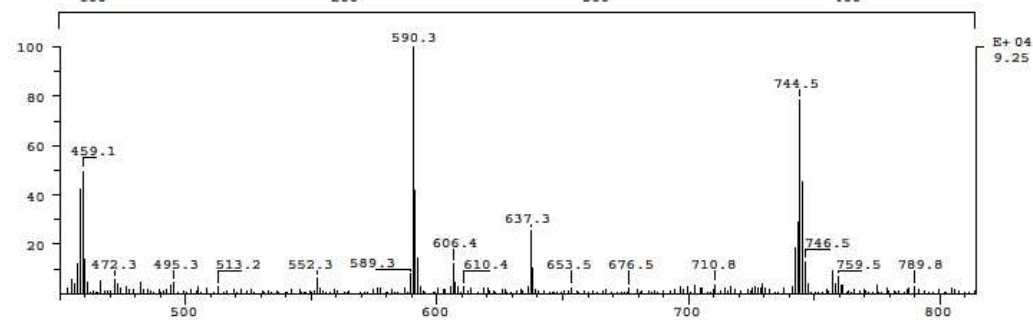

Figure S51. MS-FAB spectra of compound 14.

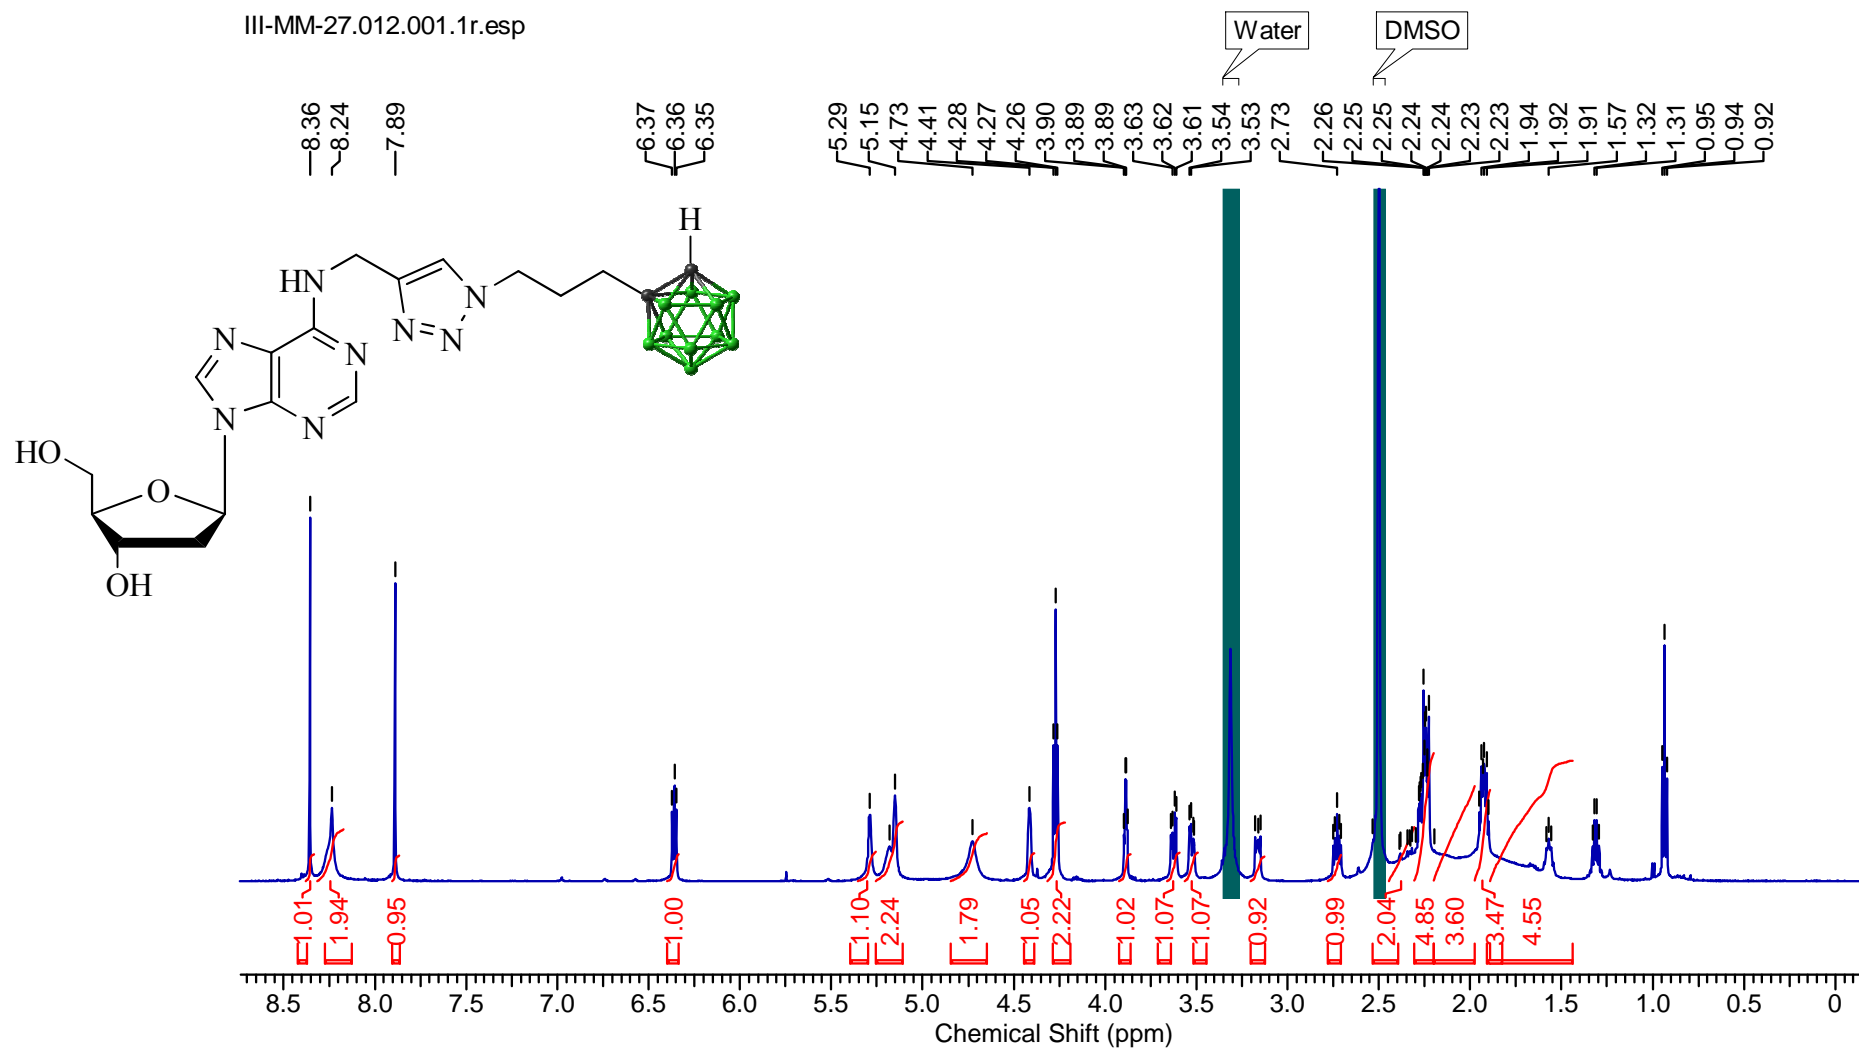

Figure S52. <sup>1</sup>H NMR spectrum of compound 24.



III-MM-27.010.001.1r.esp

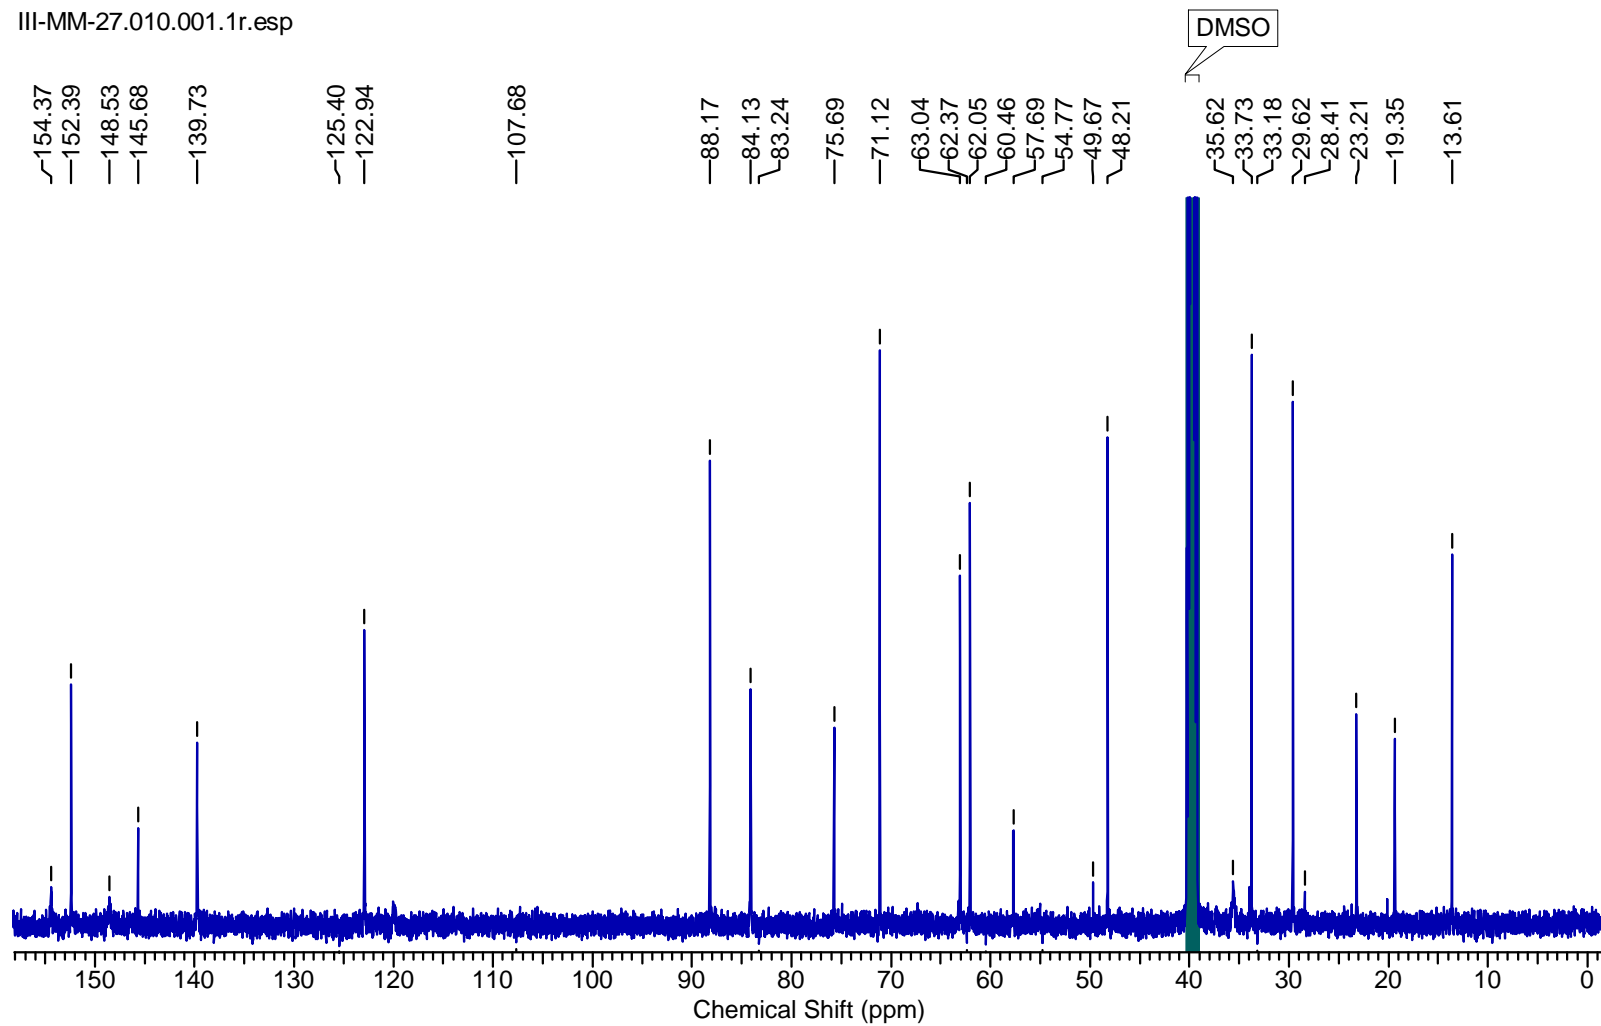

Figure S53.  $^{13}\text{C}$  NMR spectrum of compound 24.

III-MM-27.011.001.1r.esp

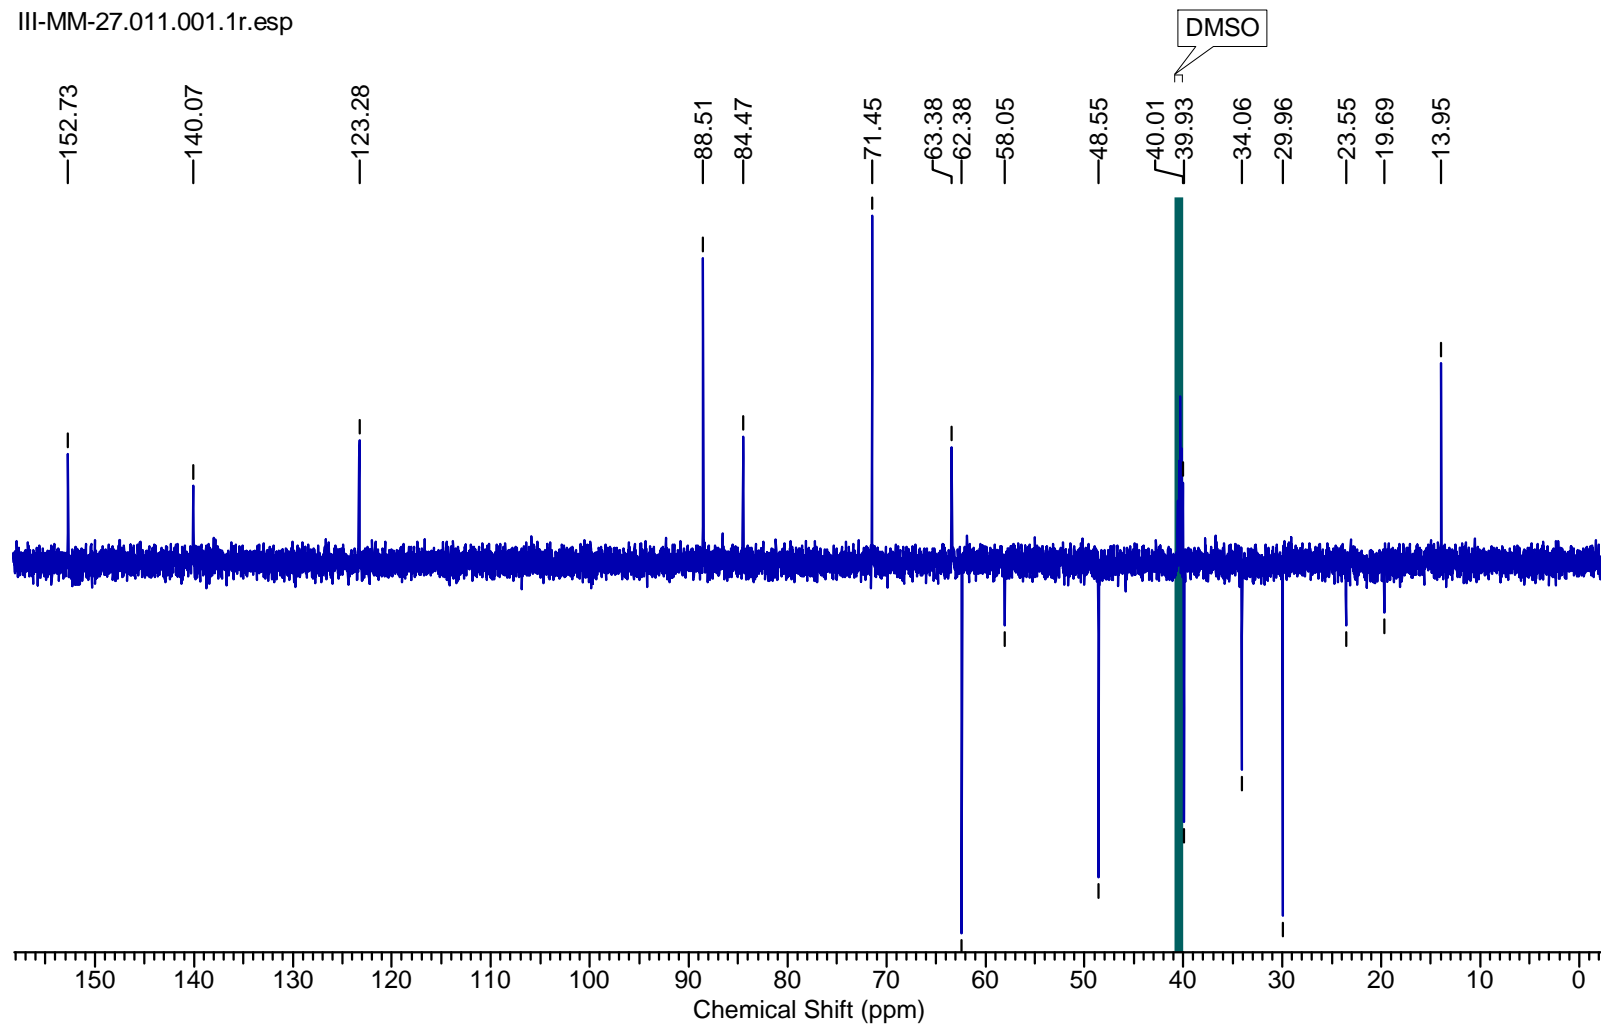

*Figure S54.* DEPT-135 spectrum of compound **24**.

III-MM-27.003.001.1r.esp

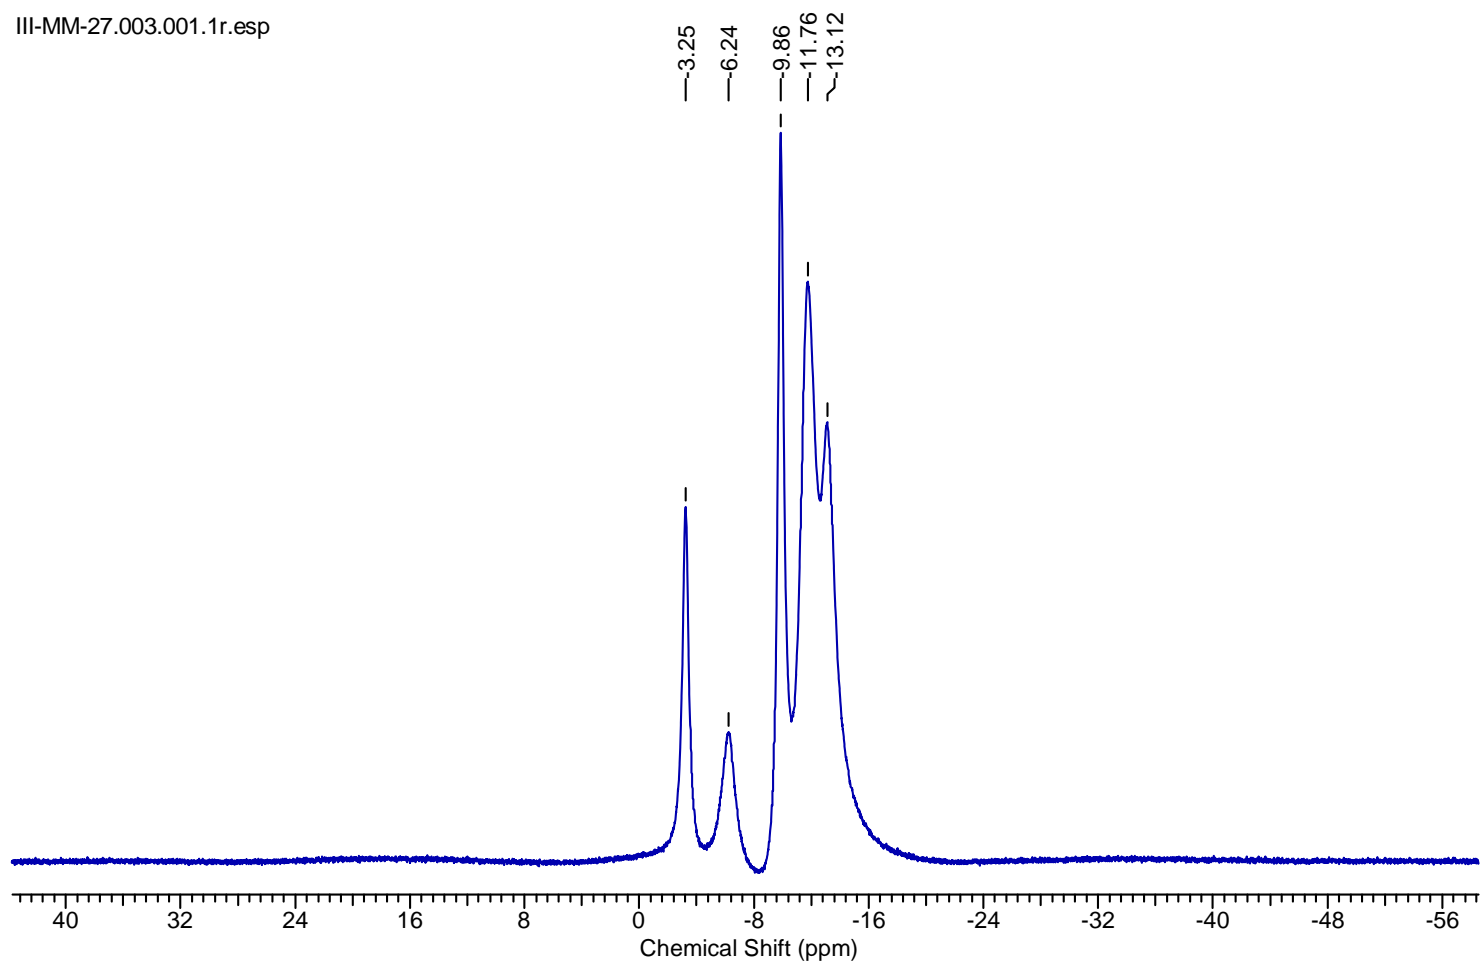

**Figure S55.**  $^{11}\text{B}\{^1\text{H BB}\}$  NMR spectrum of compound **24**.

III-MM-27.004.001.1r.esp

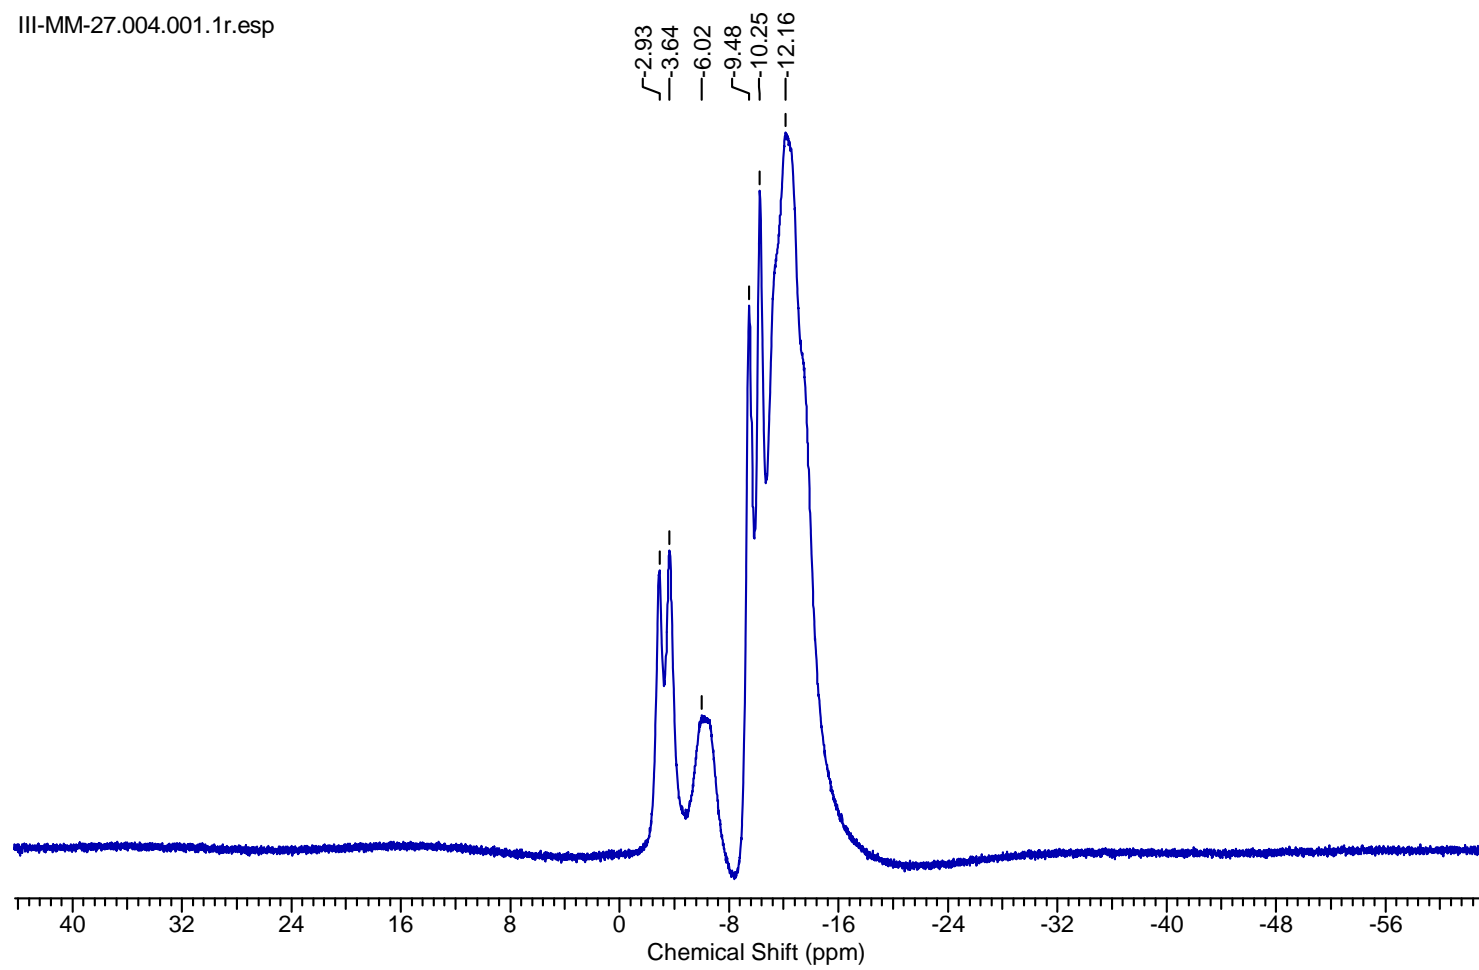

**Figure S56.**  $^{11}\text{B}$  NMR spectrum of compound **24**.

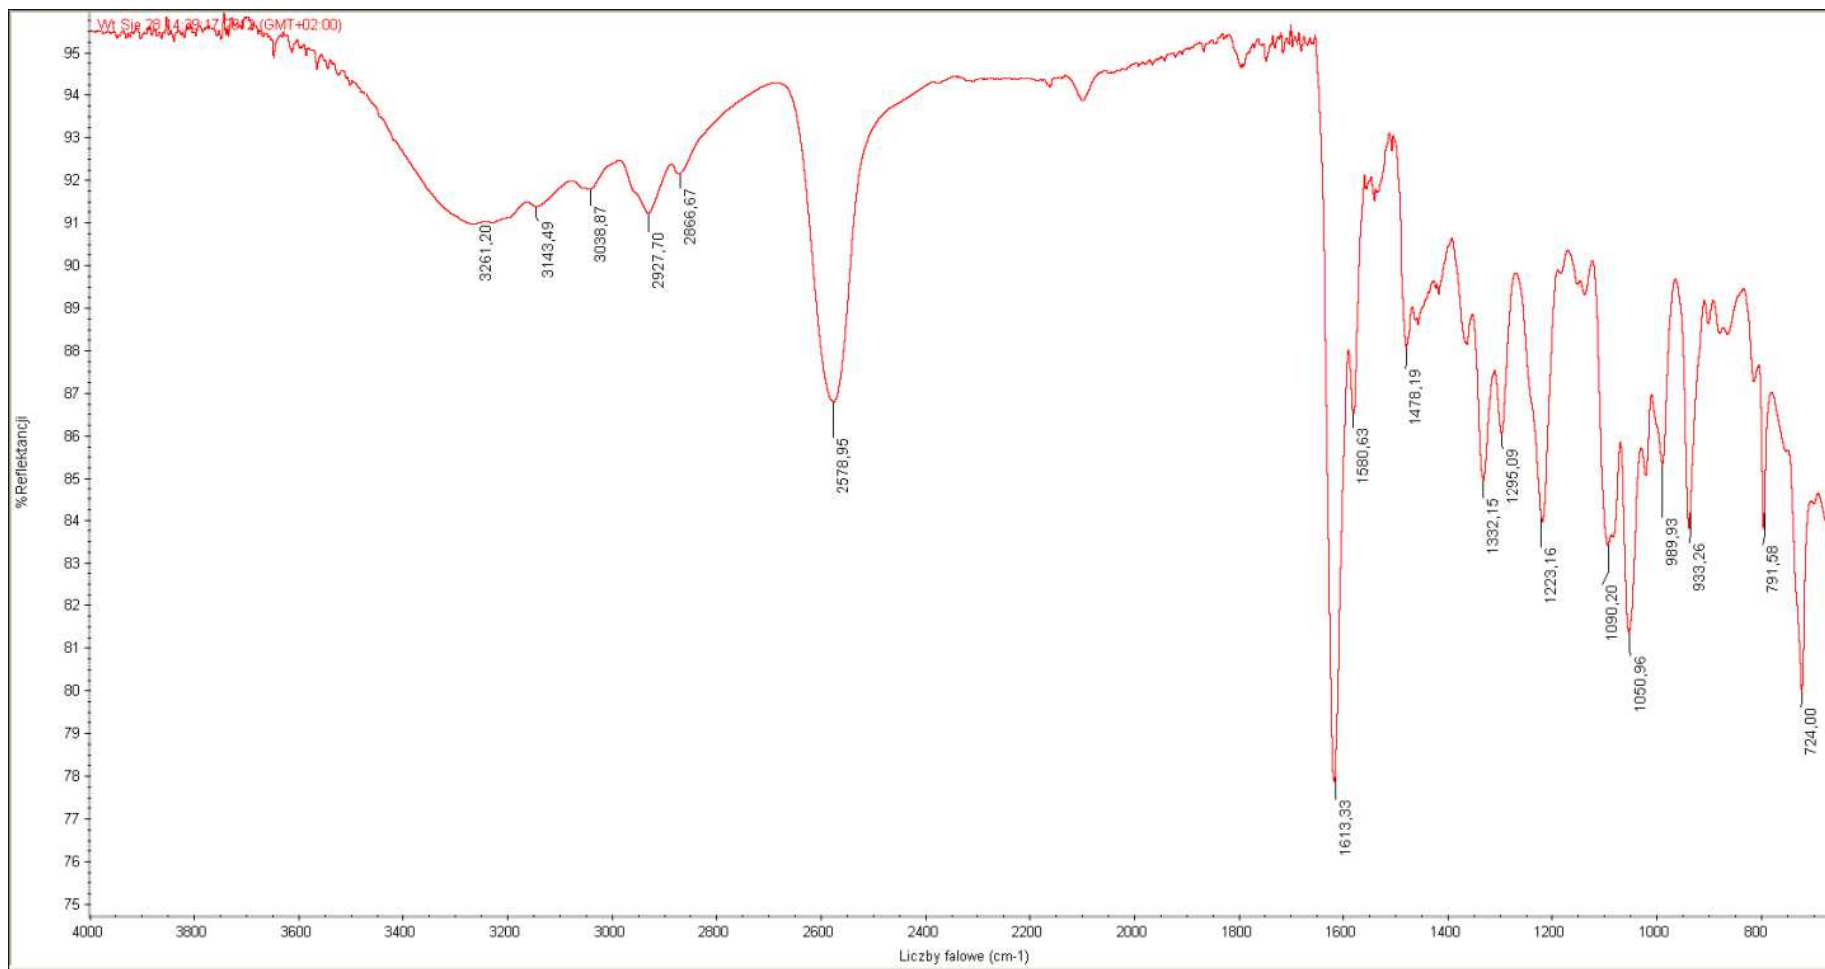

**Figure S57.** IR spectrum of compound **24**.



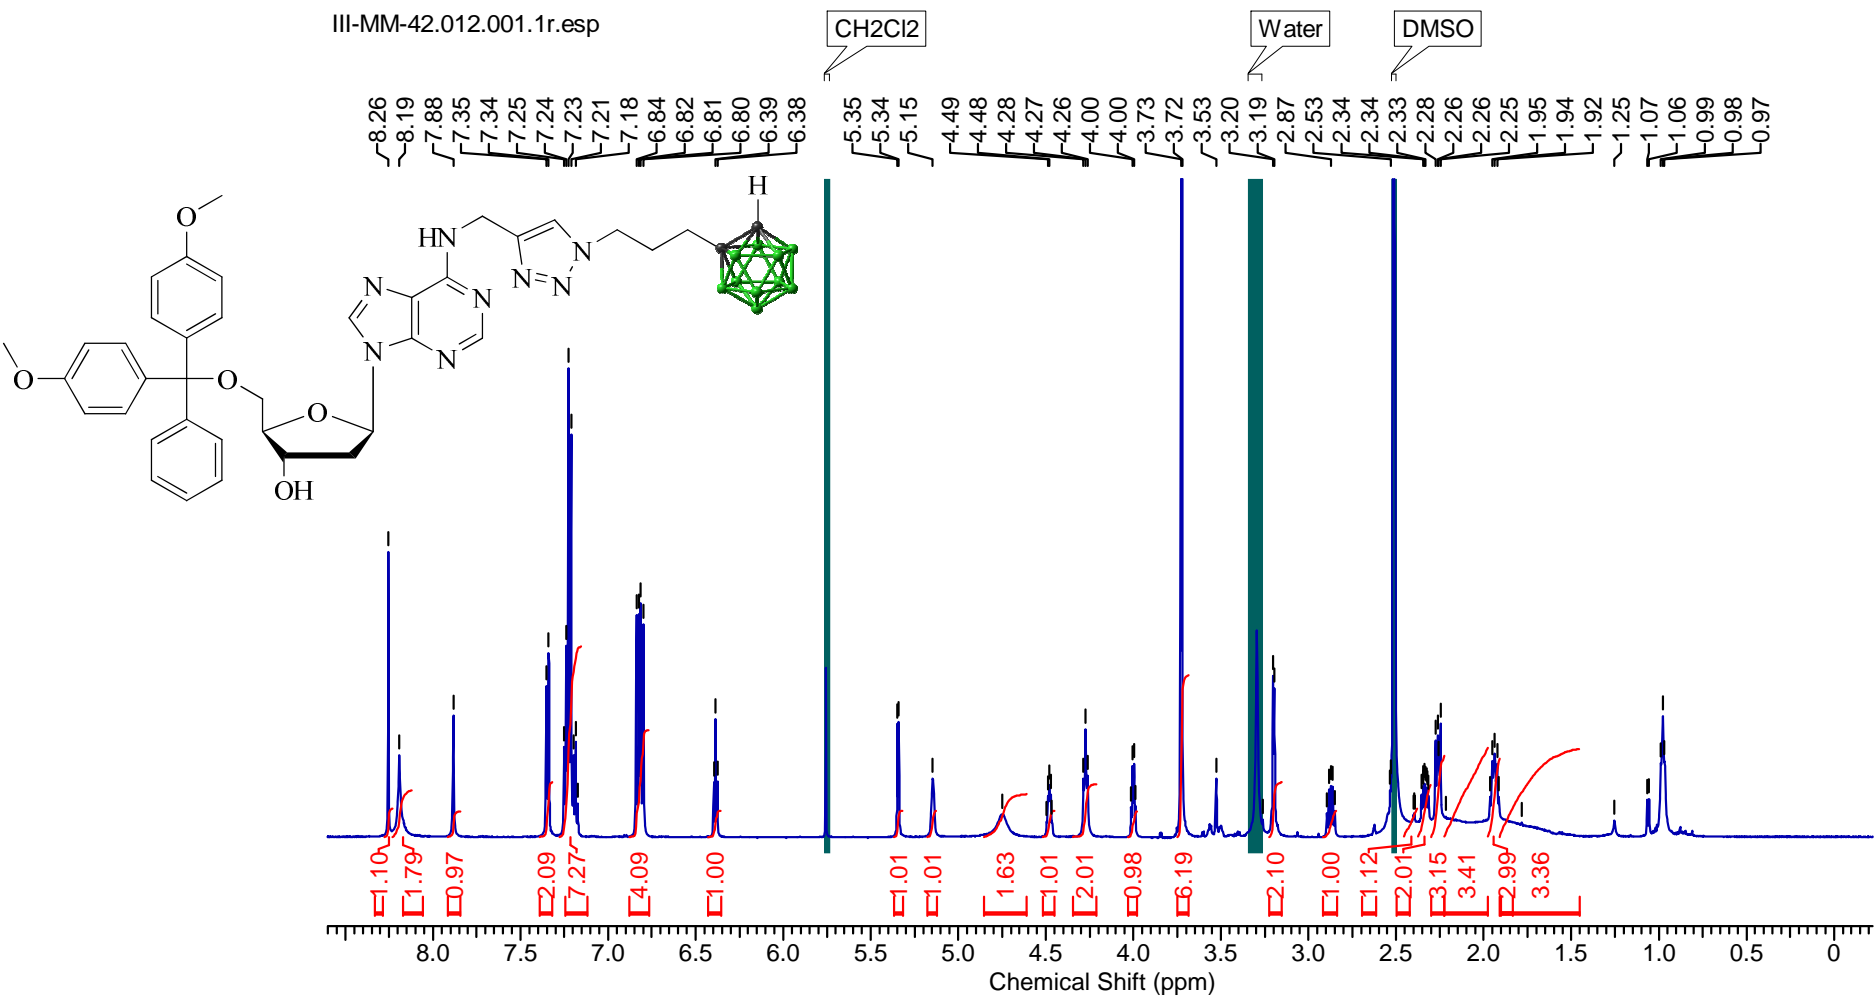

Figure S59. <sup>1</sup>H NMR spectrum of compound 25.

III-MM-42.010.001.1r.esp

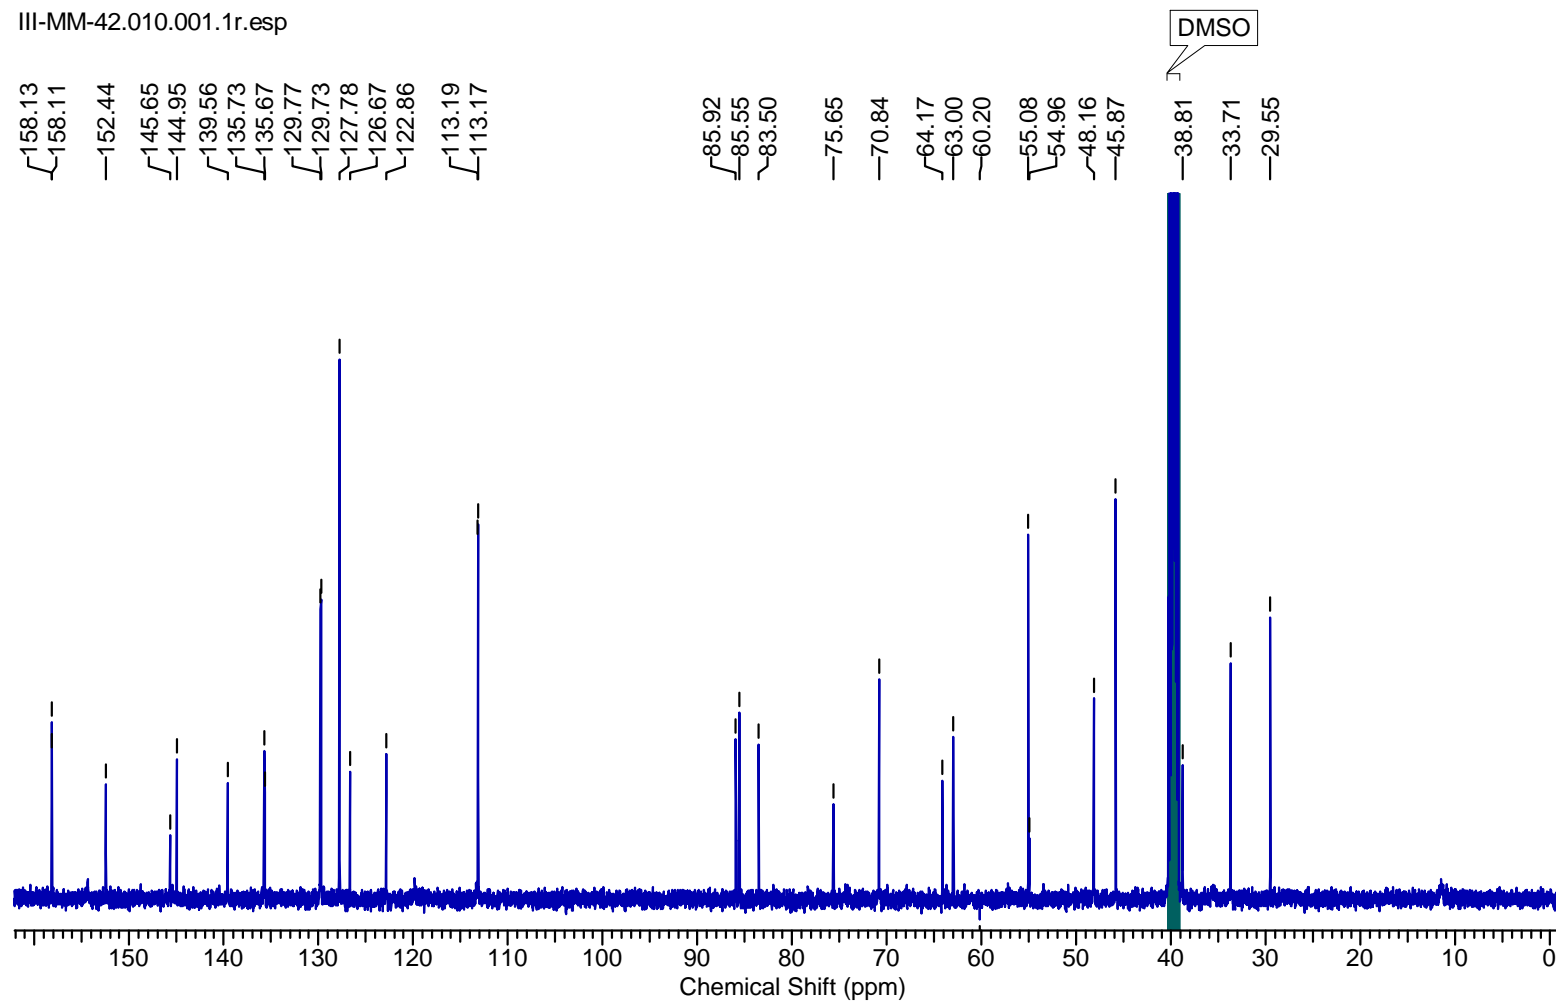

Figure S60.  $^{13}\text{C}$  NMR spectrum of compound 25.



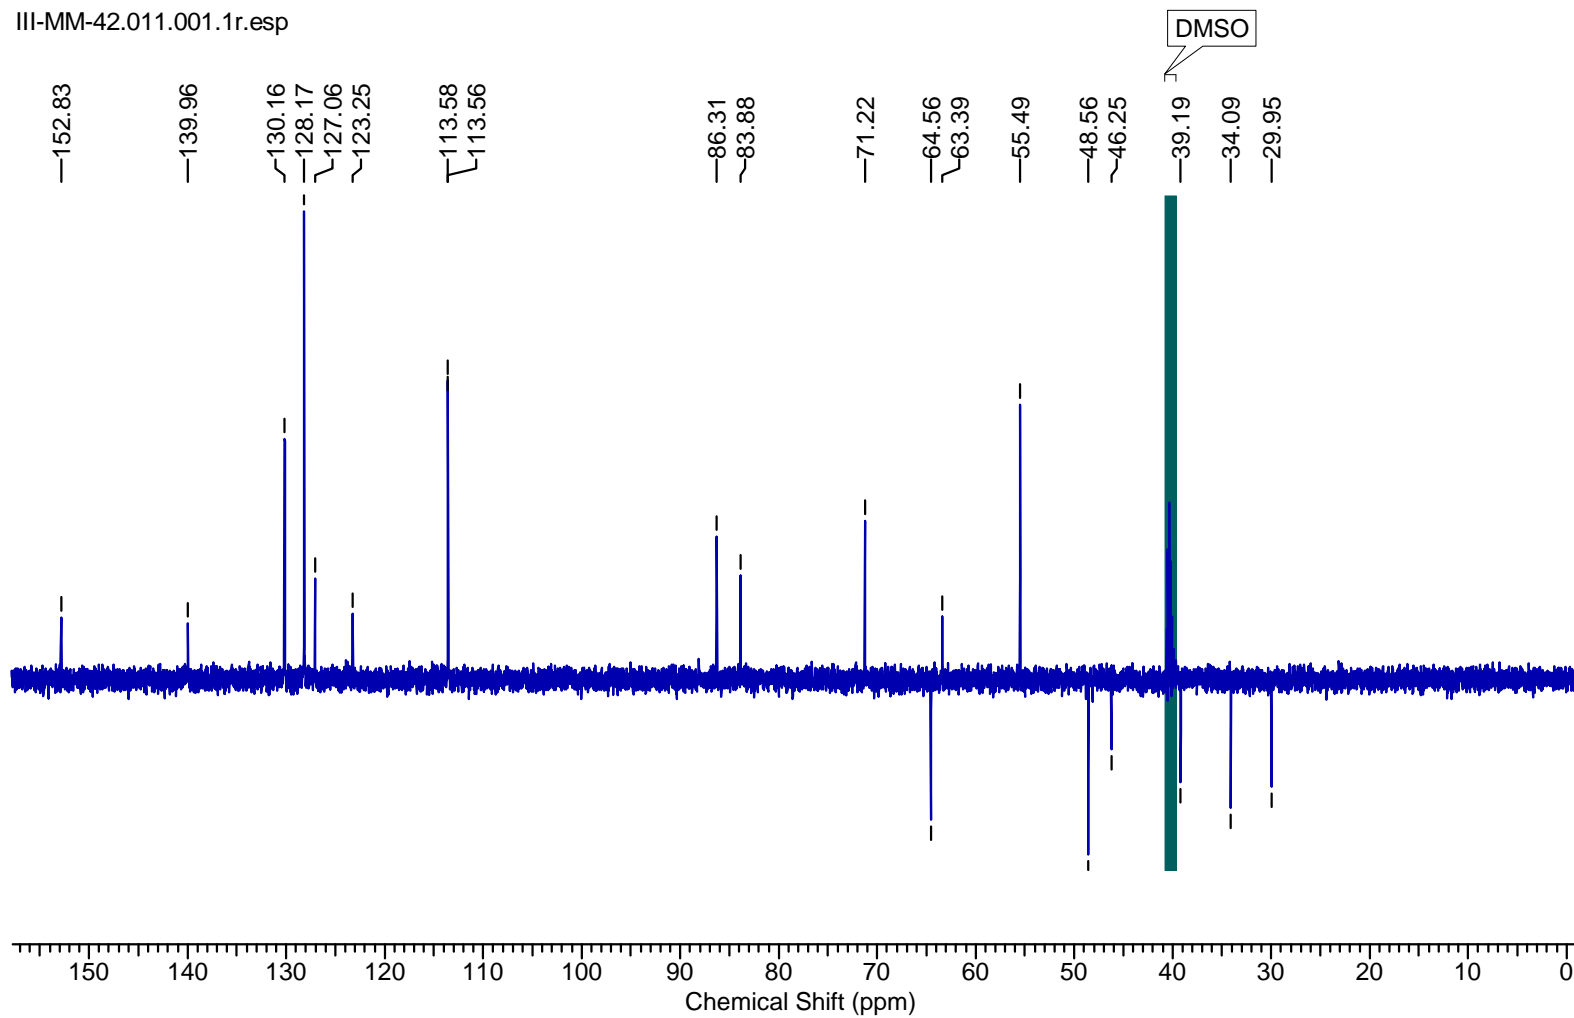

*Figure S61.* DEPT-135 spectrum of compound **25**.

III-MM-42.003.001.1r.esp

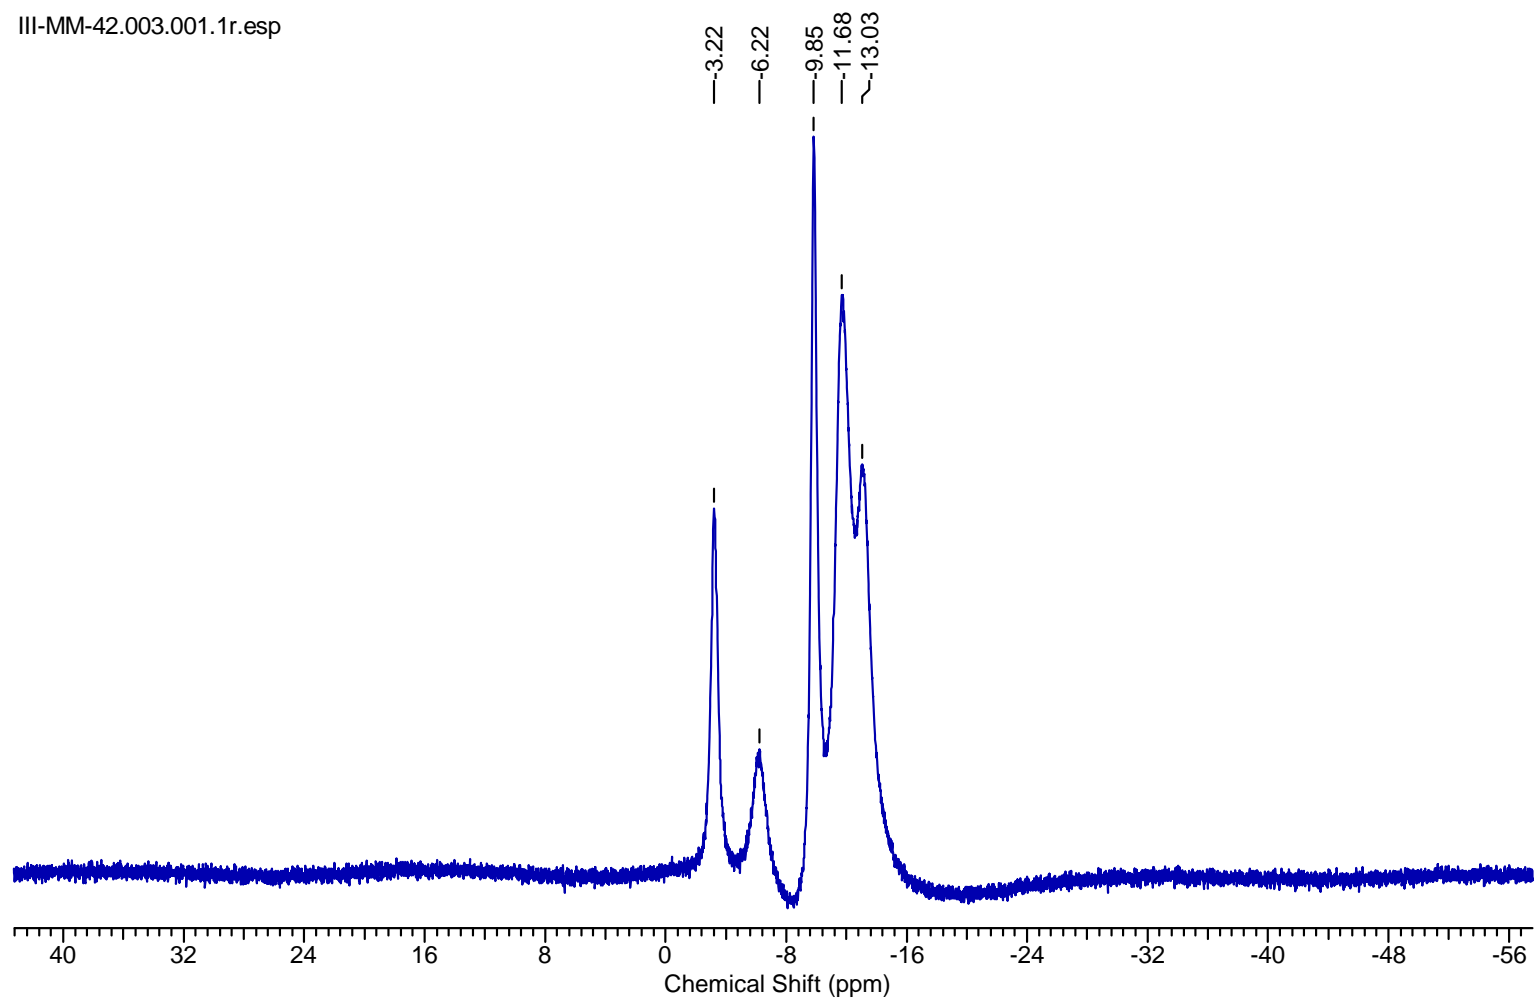

*Figure S62.*  $^{11}\text{B}\{^1\text{H BB}\}$  NMR spectrum of compound **25**.

III-MM-42.004.001.1r.esp

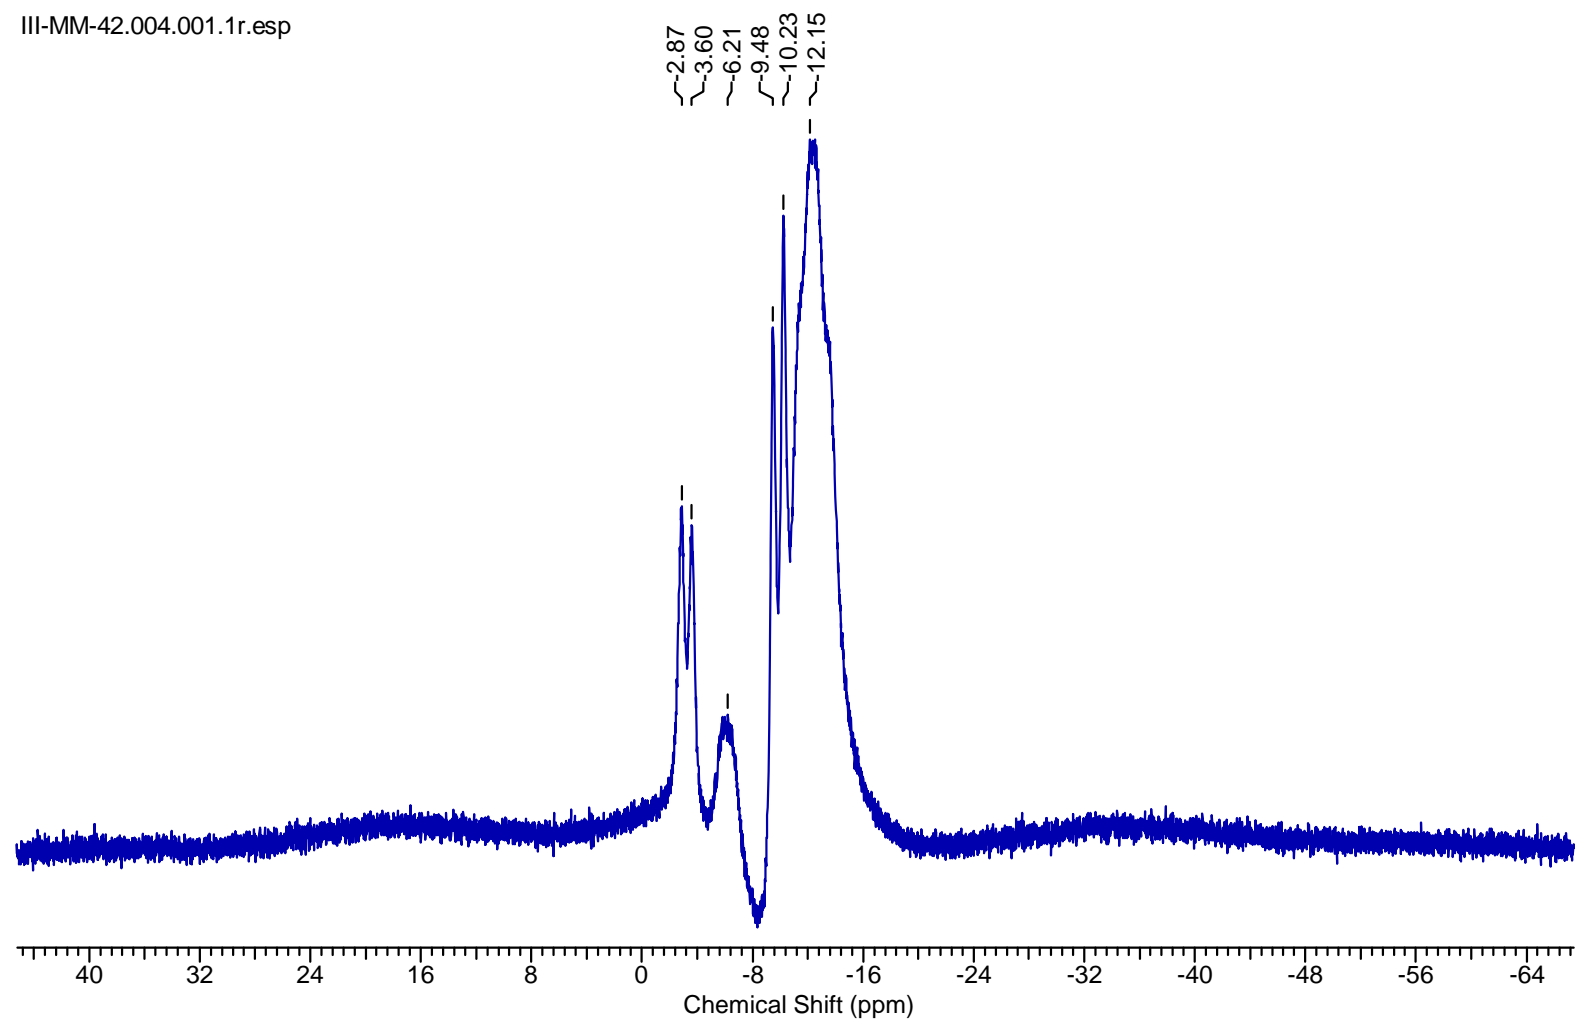

*Figure S63.*  $^{11}\text{B}$  NMR spectrum of compound **25**.

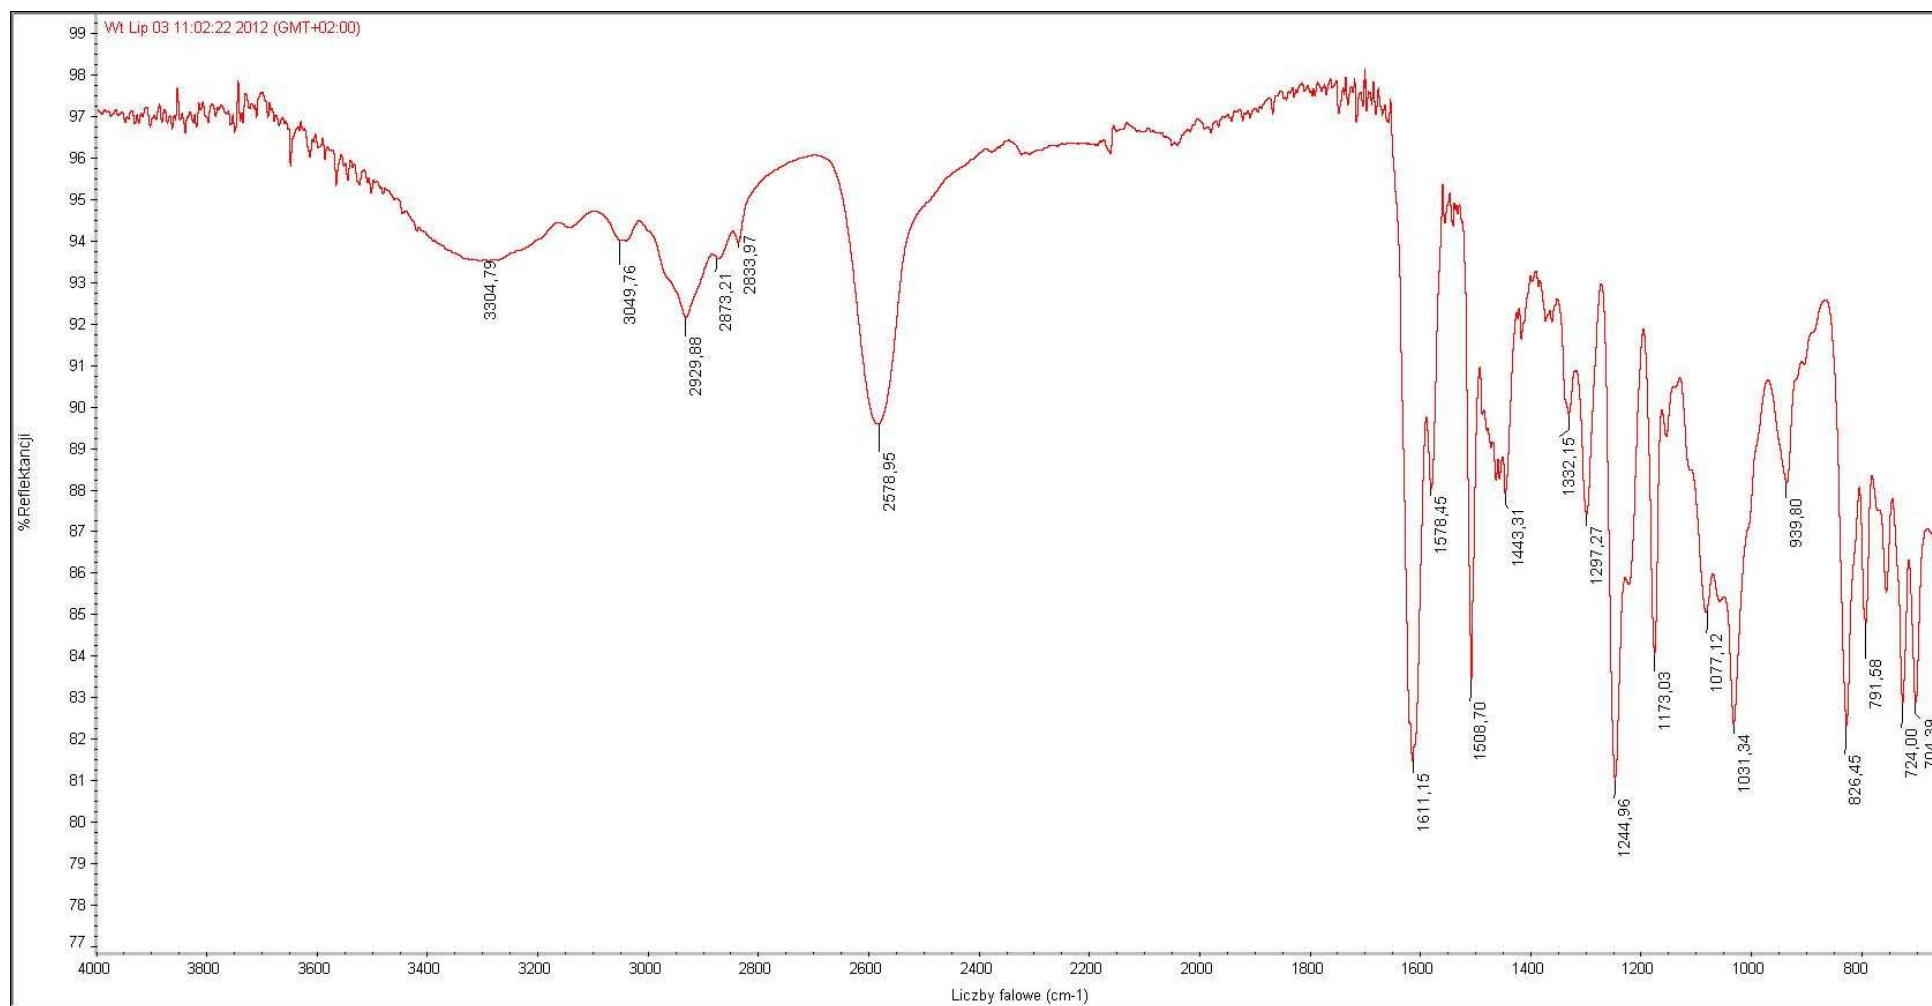

*Figure S64.* IR spectrum of compound **25**.

SPEC: ax6631bm 27-Jun-12 REG : 00:16.4 #9  
 Samp: I11-MM-42 Start : 14:20:39 10  
 Comm: LSI, Cs+ 13 keV, nba  
 Mode: FAB +VE +LMR BSCAN (EXP) UP LR NRM Study : MS CBMIM PAN Lodz  
 Oper: ed Client: IBM A.Olejniczak Inlet :  
 Base: 303.2 Inten : 1755645 Masses: 100 > 1000  
 Norm: 303.2 RIC : 10029367 #peaks: 759  
 Peak: 1000.00 mmu  
 Data: +1>10

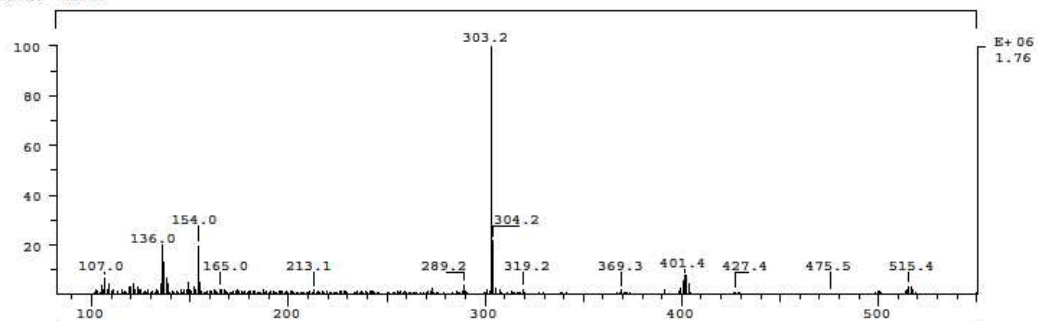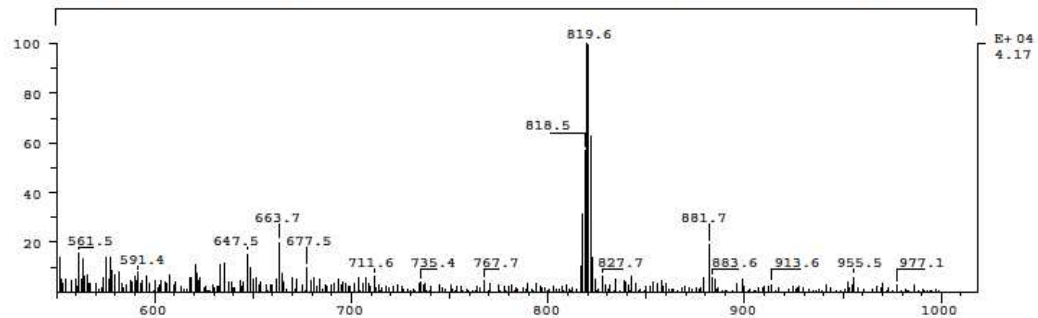

SPEC: ax6631bm\_a 27-Jun-12 REG : 00:16.4 #9  
 Samp: I11-MM-42 Start : 14:24:38 10  
 Comm: LSI, Cs+ 13 keV, nba  
 Mode: FAB -VE -LMR BSCAN (EXP) UP LR NRM Study : MS CBMIM PAN Lodz  
 Oper: ed Client: IBM A.Olejniczak Inlet :  
 Base: 152.9 Inten : 36550 Masses: 100 > 1000  
 Norm: 152.9 RIC : 408968 #peaks: 366  
 Peak: 1000.00 mmu  
 Data: +1>10

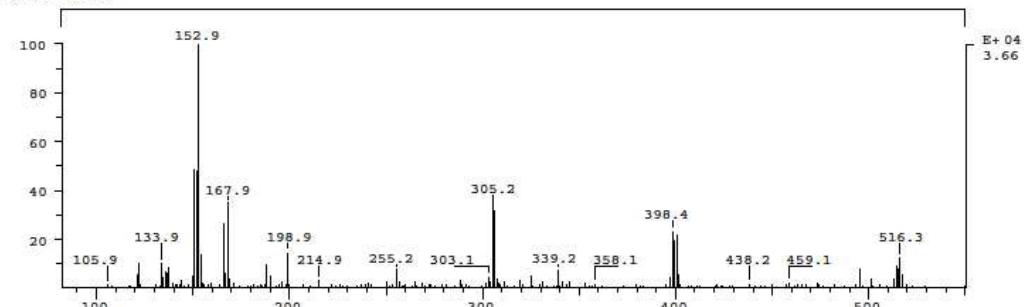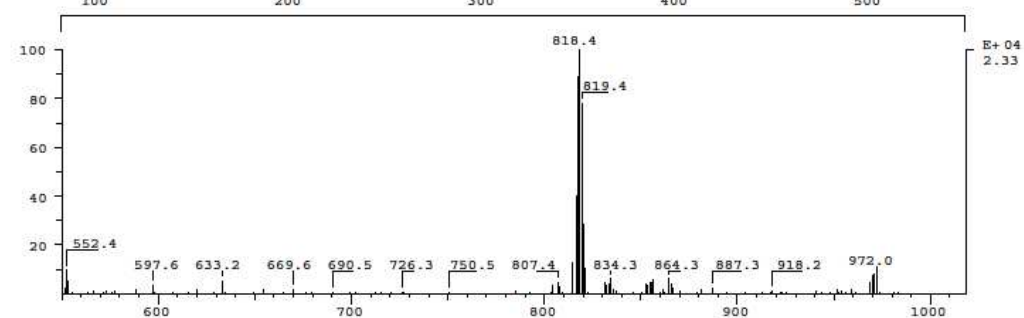

Figure S65. MS spectra of compound 25.



III-MM-48.010.001.1r.esp

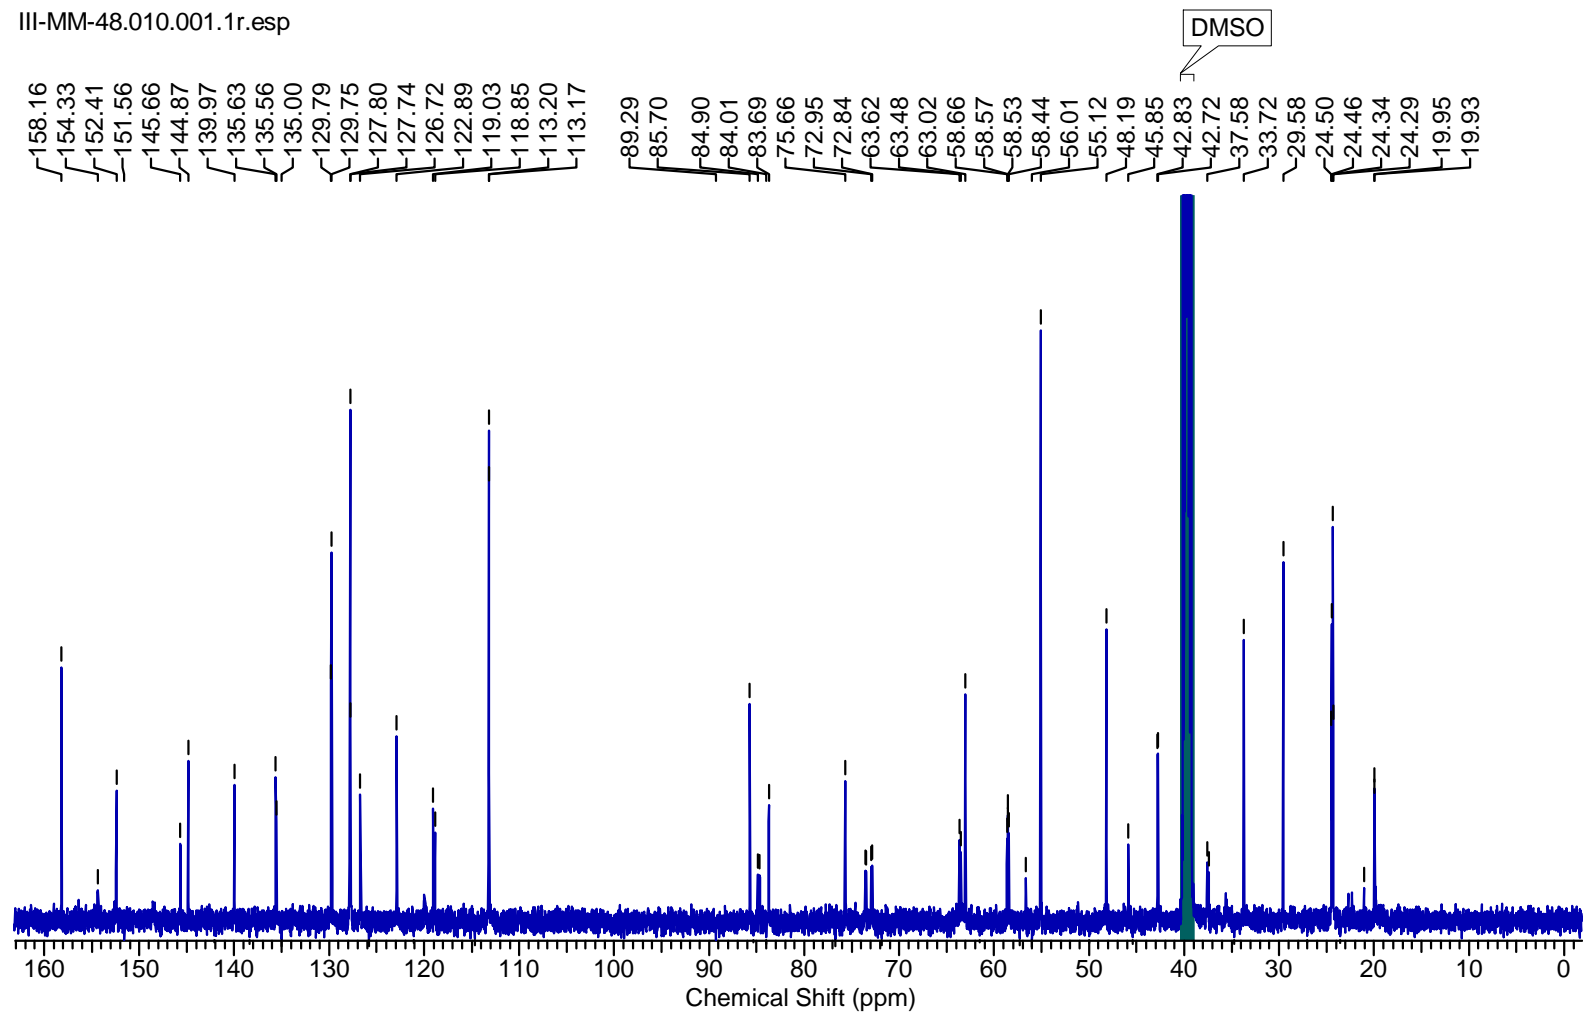

Figure S67.  $^{13}\text{C}$  NMR spectrum of compound **31**.

III-MM-48.011.001.1r.esp

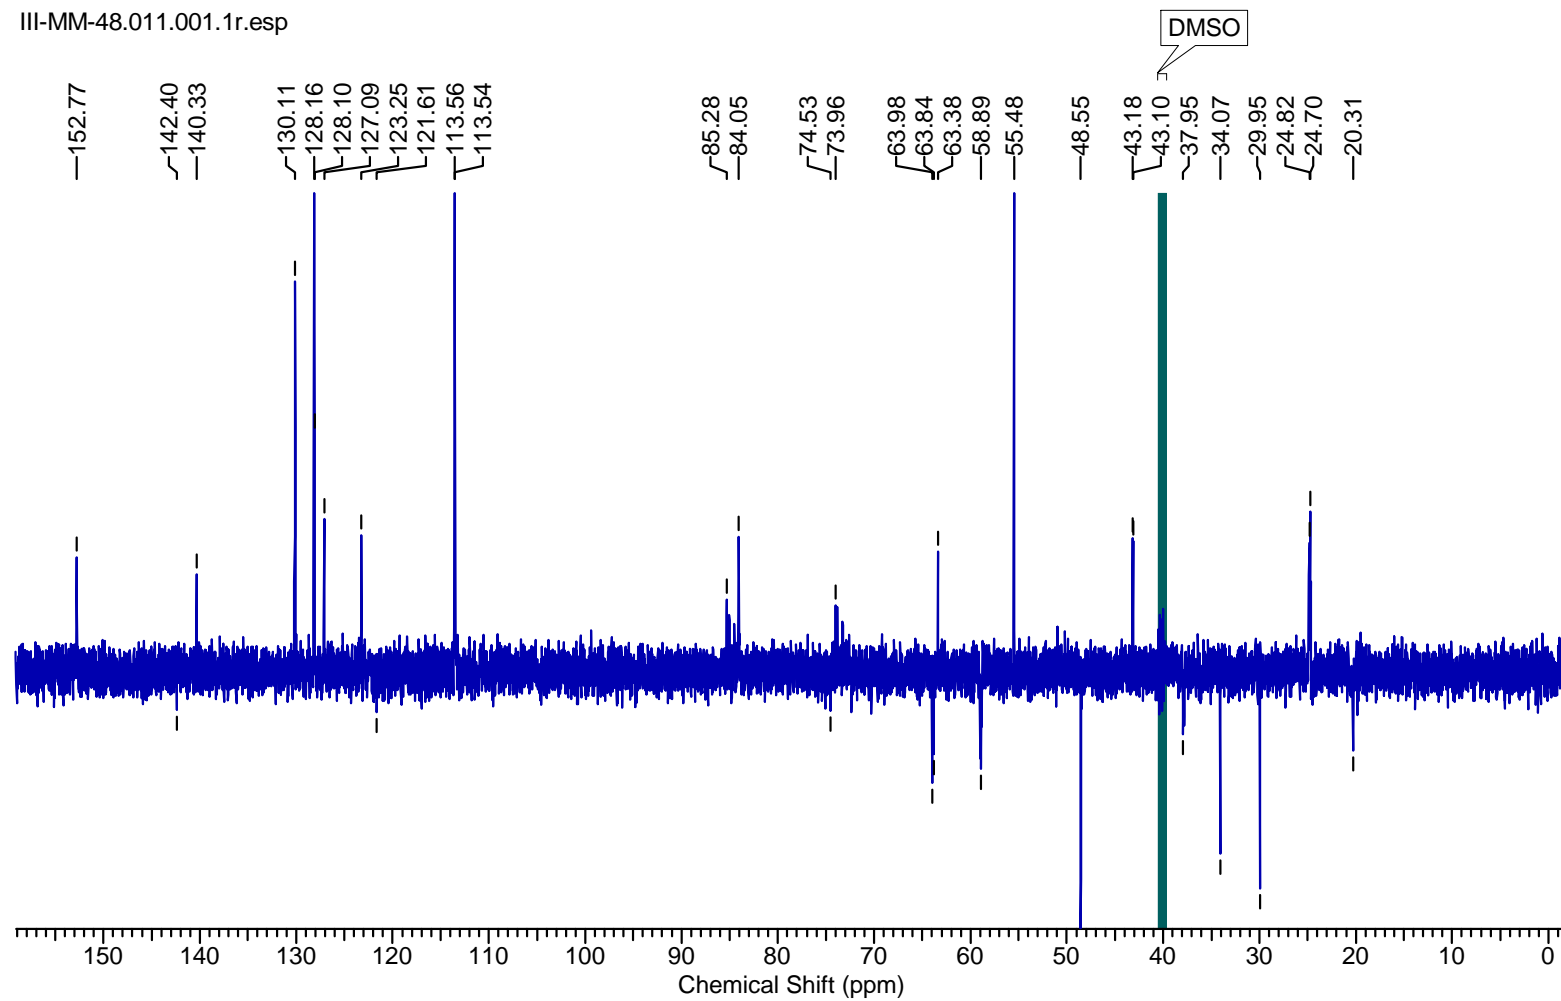

*Figure S68.* DEPT-135 spectrum of compound **31**.



III-MM-48.003.001.1r.esp

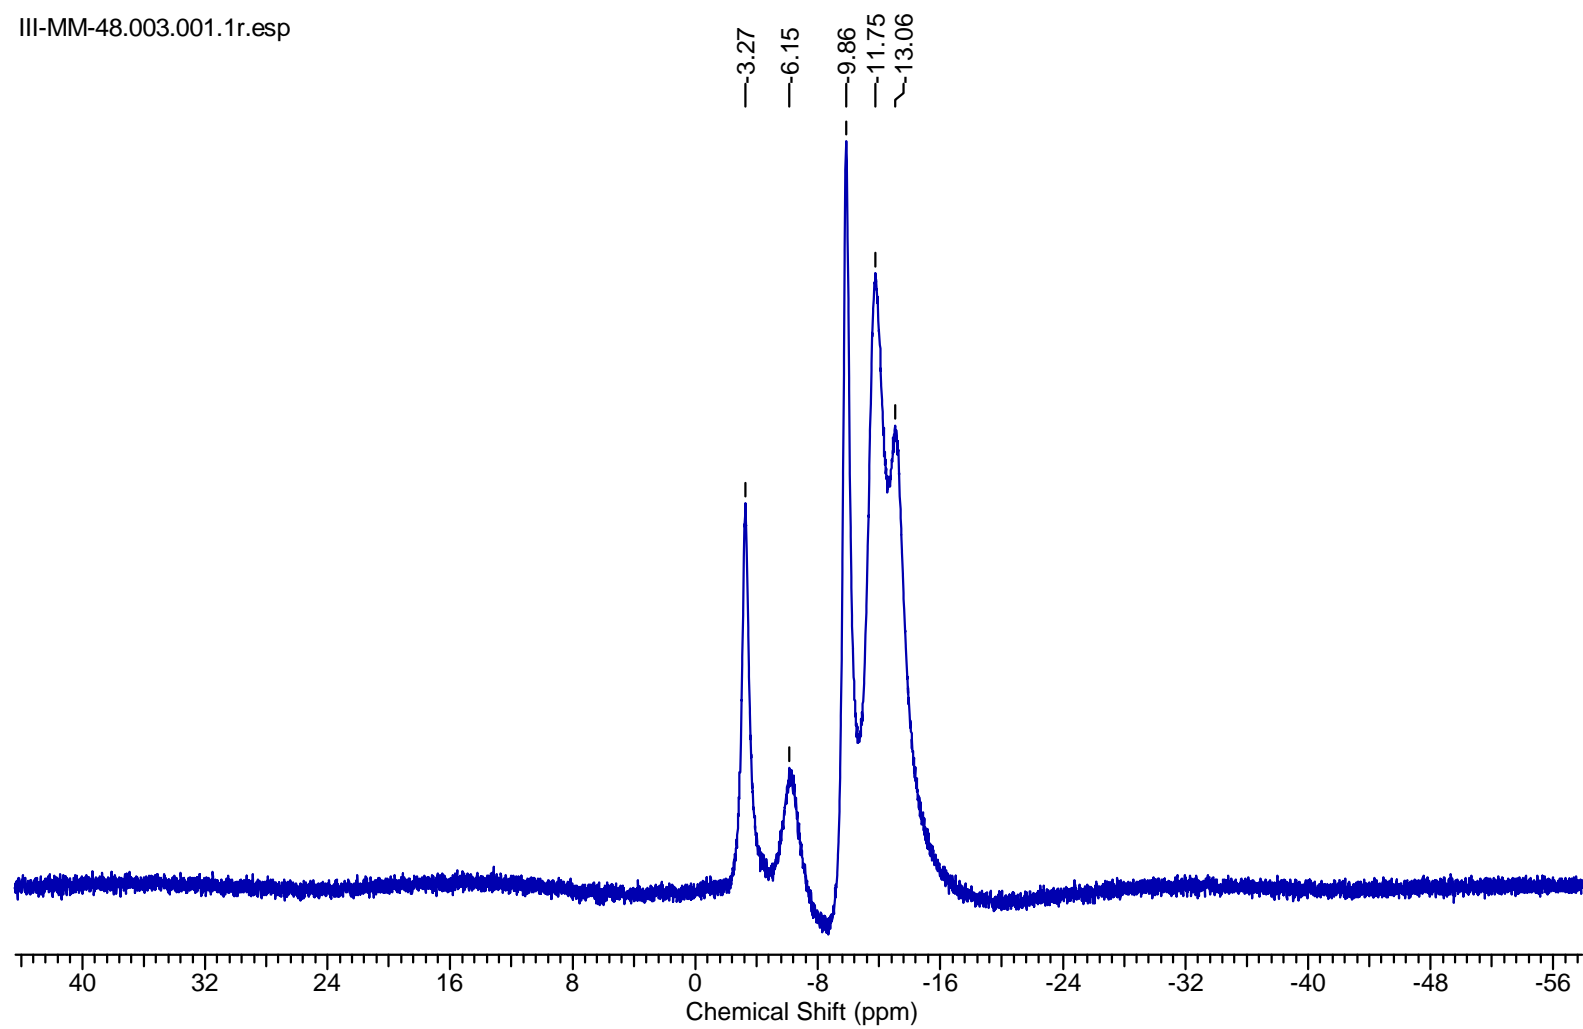

**Figure S69.**  $^{11}\text{B}\{^1\text{H BB}\}$  NMR spectrum of compound **31**.

III-MM-48.004.001.1r.esp

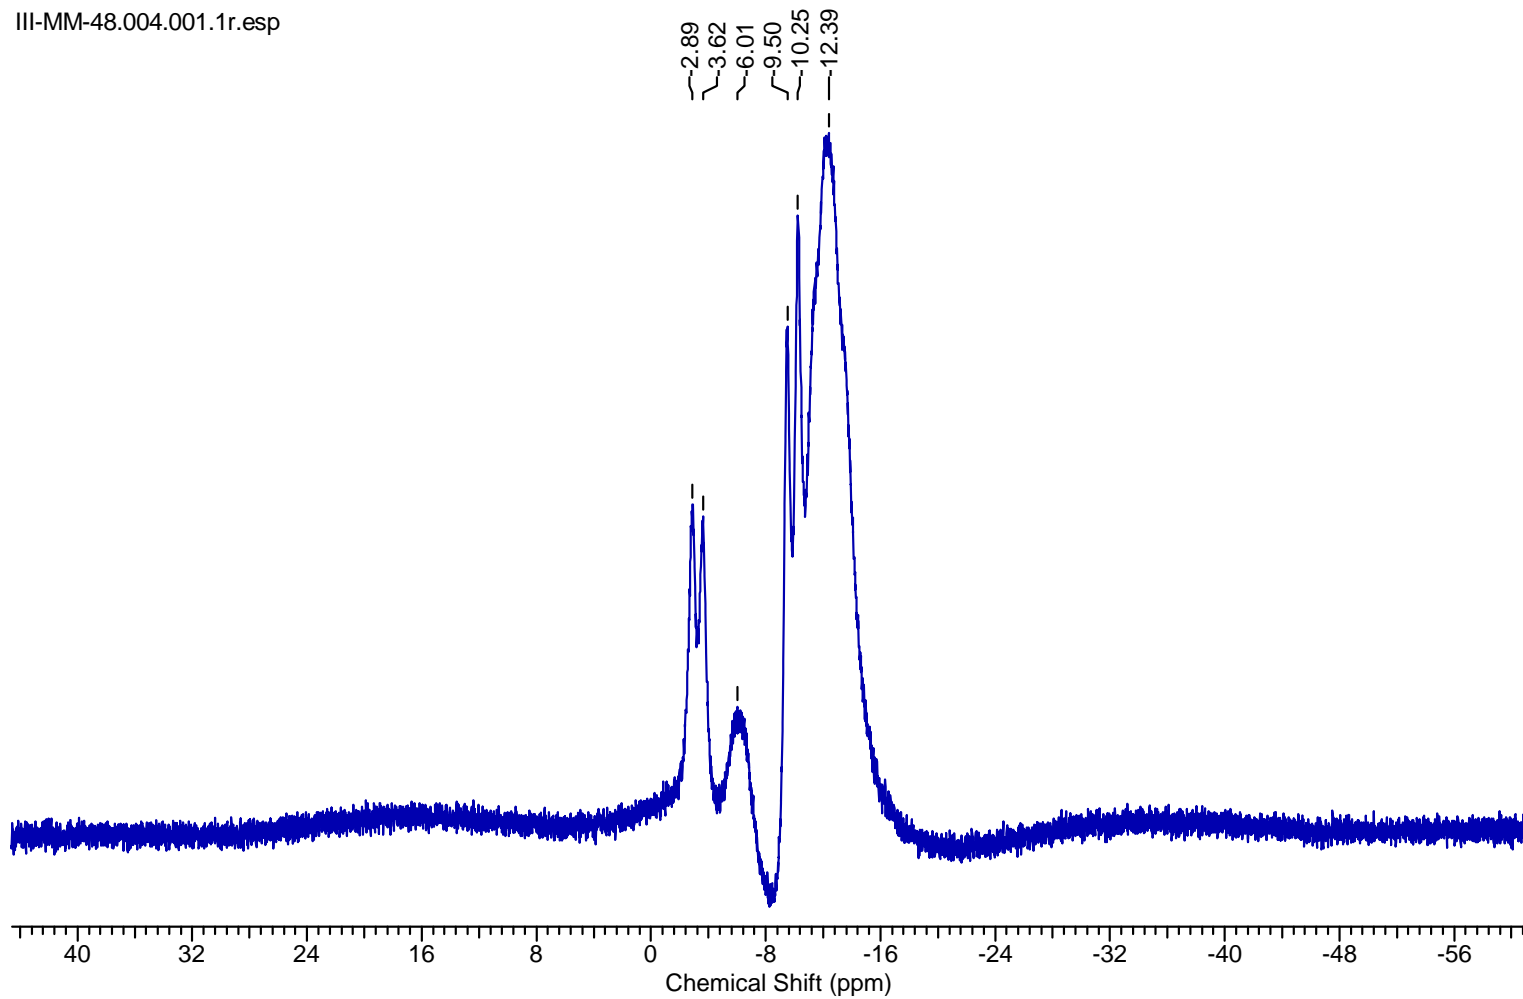

*Figure S70.*  $^{11}\text{B}$  NMR spectrum of compound **31**.

III-MM-48.017.001.1r.esp

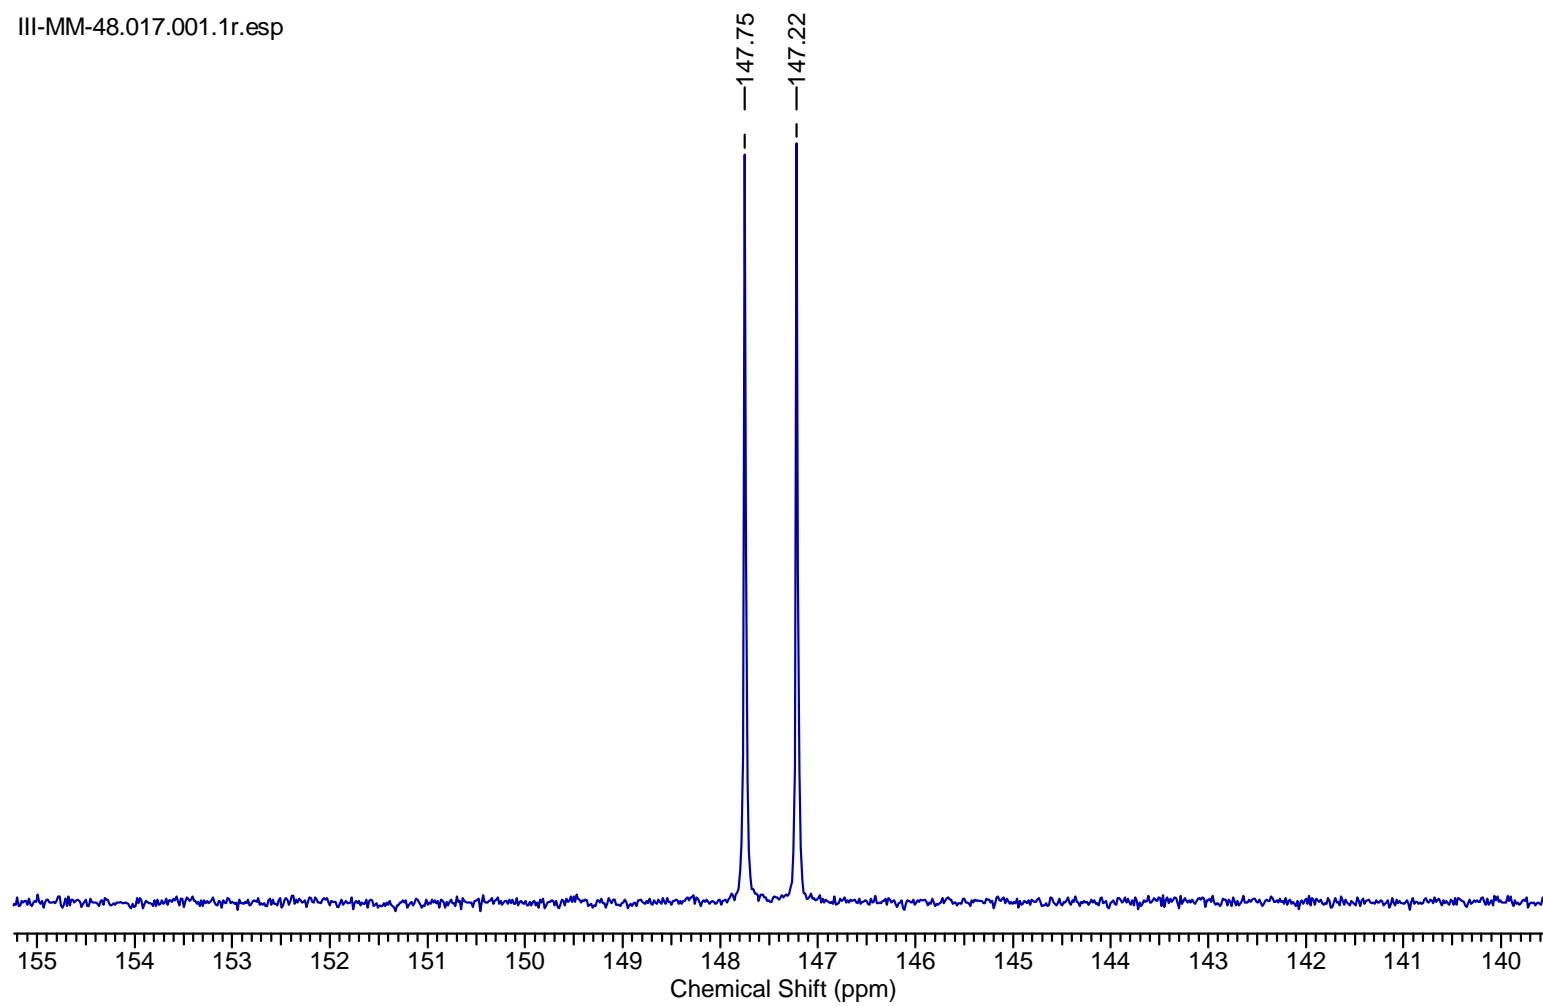

*Figure S71.*  $^{31}\text{P}$  NMR spectrum of compound **31**.

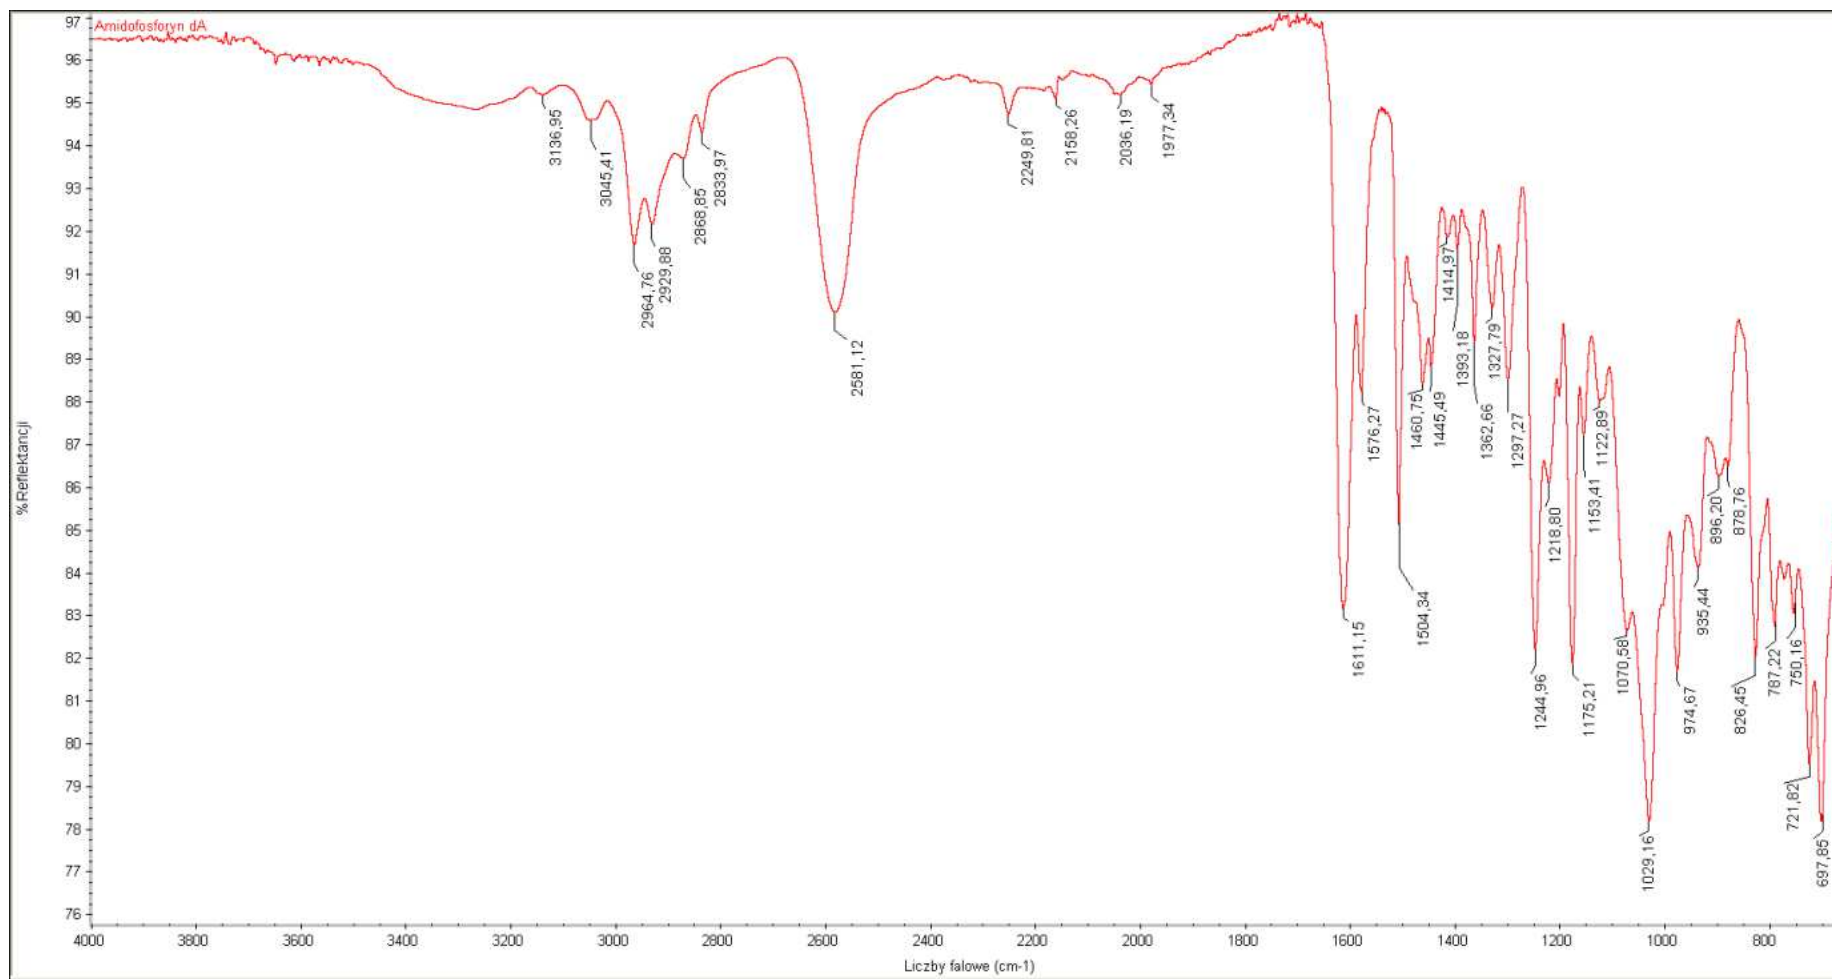

Figure S72. IR spectrum of compound 31.

SPEC: ax7461bm a                    12-Jul-12    REG : 00:16.8    #9  
 Samp: I11-MM-48                    Start : 09:50:51    10  
 Comm: LSI, Cs+ 13 keV, nba  
 Mode: FAB +VE +LMR    BSCAN (EXP) UP LR NRM    Study : MS CBMIM PAN Lodz  
 Oper: ed                    Client: IBM A.Olejniczak    Inlet :  
 Base: 303.2                    Inten : 2209754                    Masses: 100 > 1117  
 Norm: 303.2                    RIC : 7394358                    #peaks: 530  
 Peak: 1000.00 mmu  
 Data: +1>10

SPEC: ax7461bm                    12-Jul-12    REG : 00:16.8    #9  
 Samp: I11-MM-48                    Start : 09:45:49    10  
 Comm: LSI, Cs+ 13 keV, nba  
 Mode: FAB -VE -LMR    BSCAN (EXP) UP LR NRM    Study : MS CBMIM PAN Lodz  
 Oper: ed                    Client: IBM A.Olejniczak    Inlet :  
 Base: 152.9                    Inten : 403214                    Masses: 100 > 1117  
 Norm: 152.9                    RIC : 2810976                    #peaks: 536  
 Peak: 1000.00 mmu  
 Data: +1>10

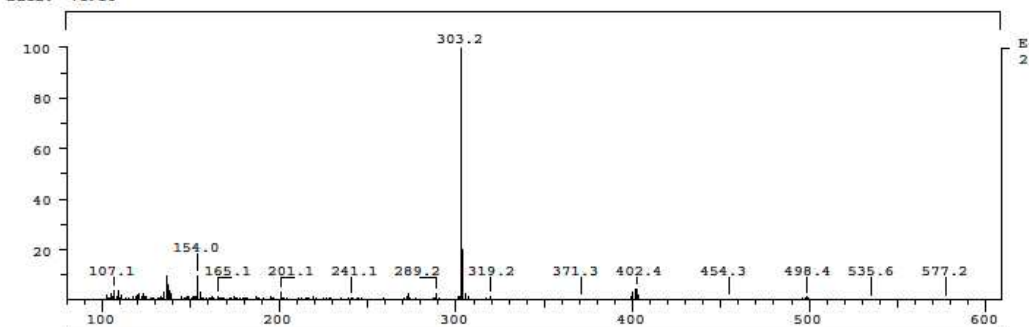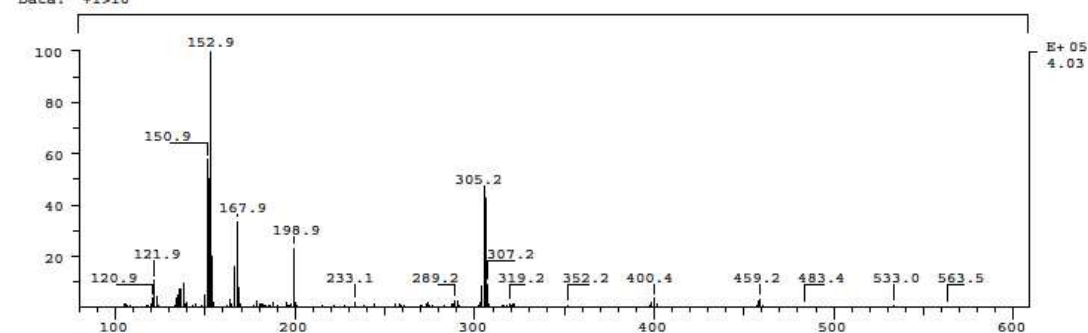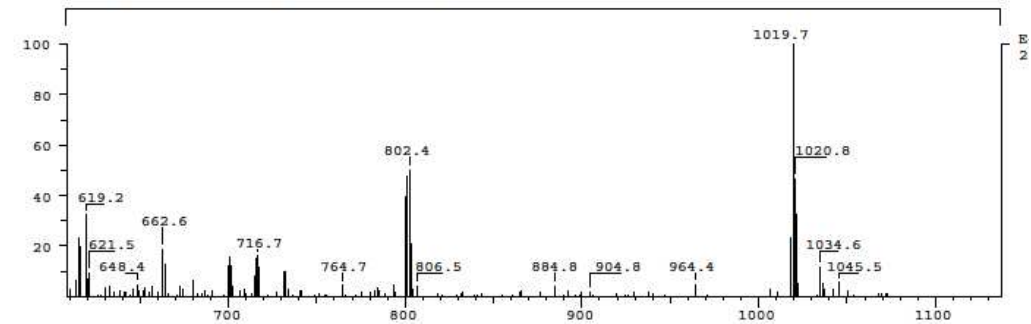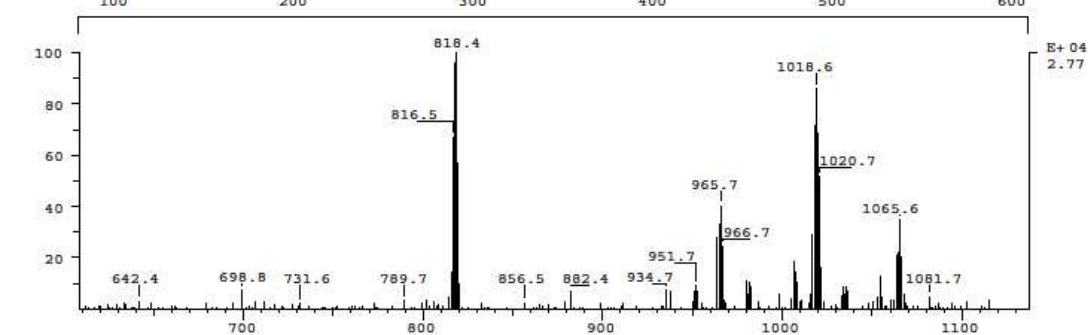

Figure S73. MS-FAB spectra of compound 31.

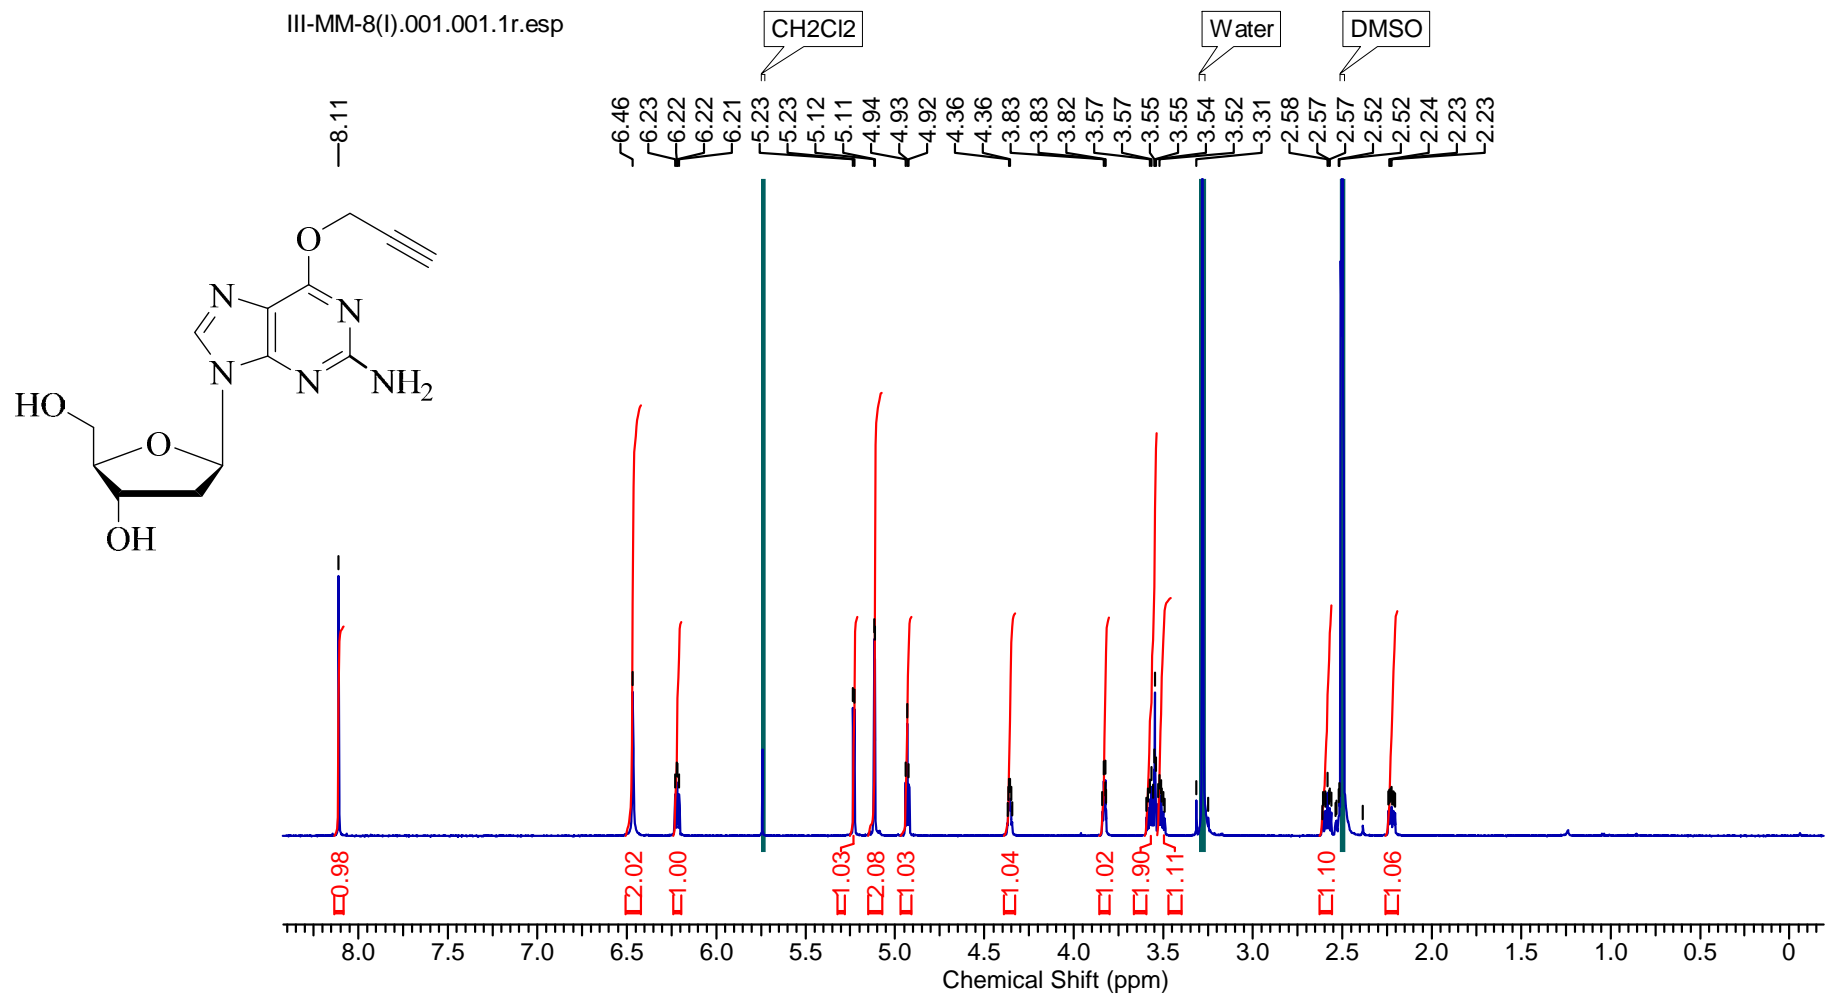

Figure S74. <sup>1</sup>H NMR spectrum of compound 16.

III-MM-52.012.001.1r.esp

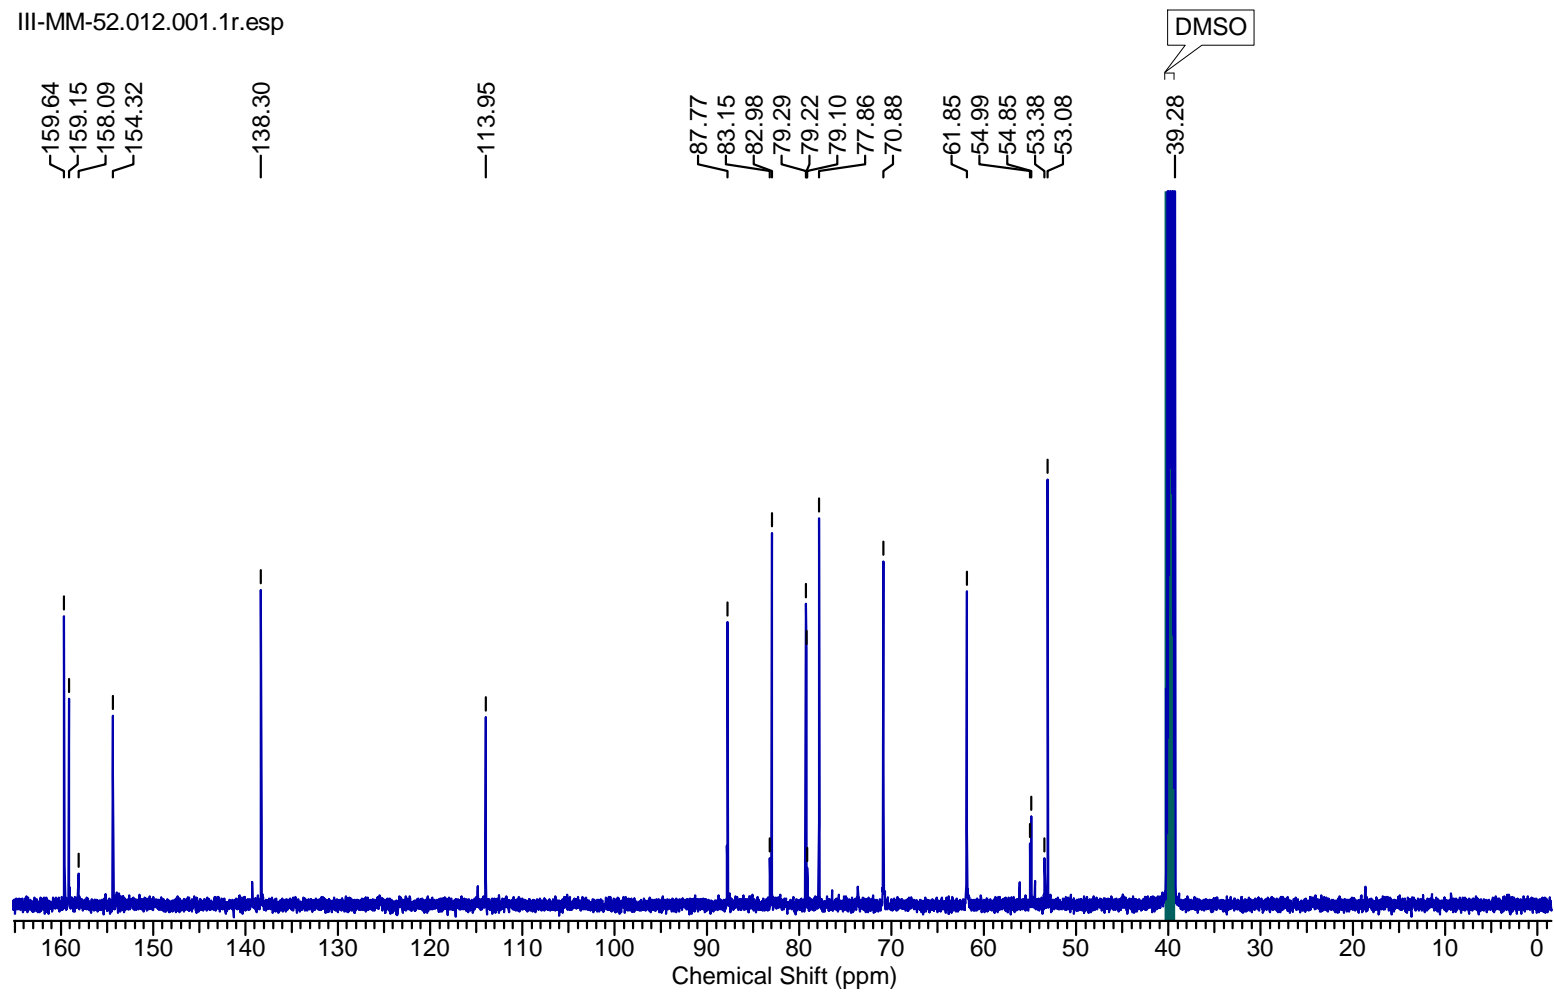

Figure S75.  $^{13}\text{C}$  NMR spectrum of compound **16**.

III-MM-52.013.001.1r.esp

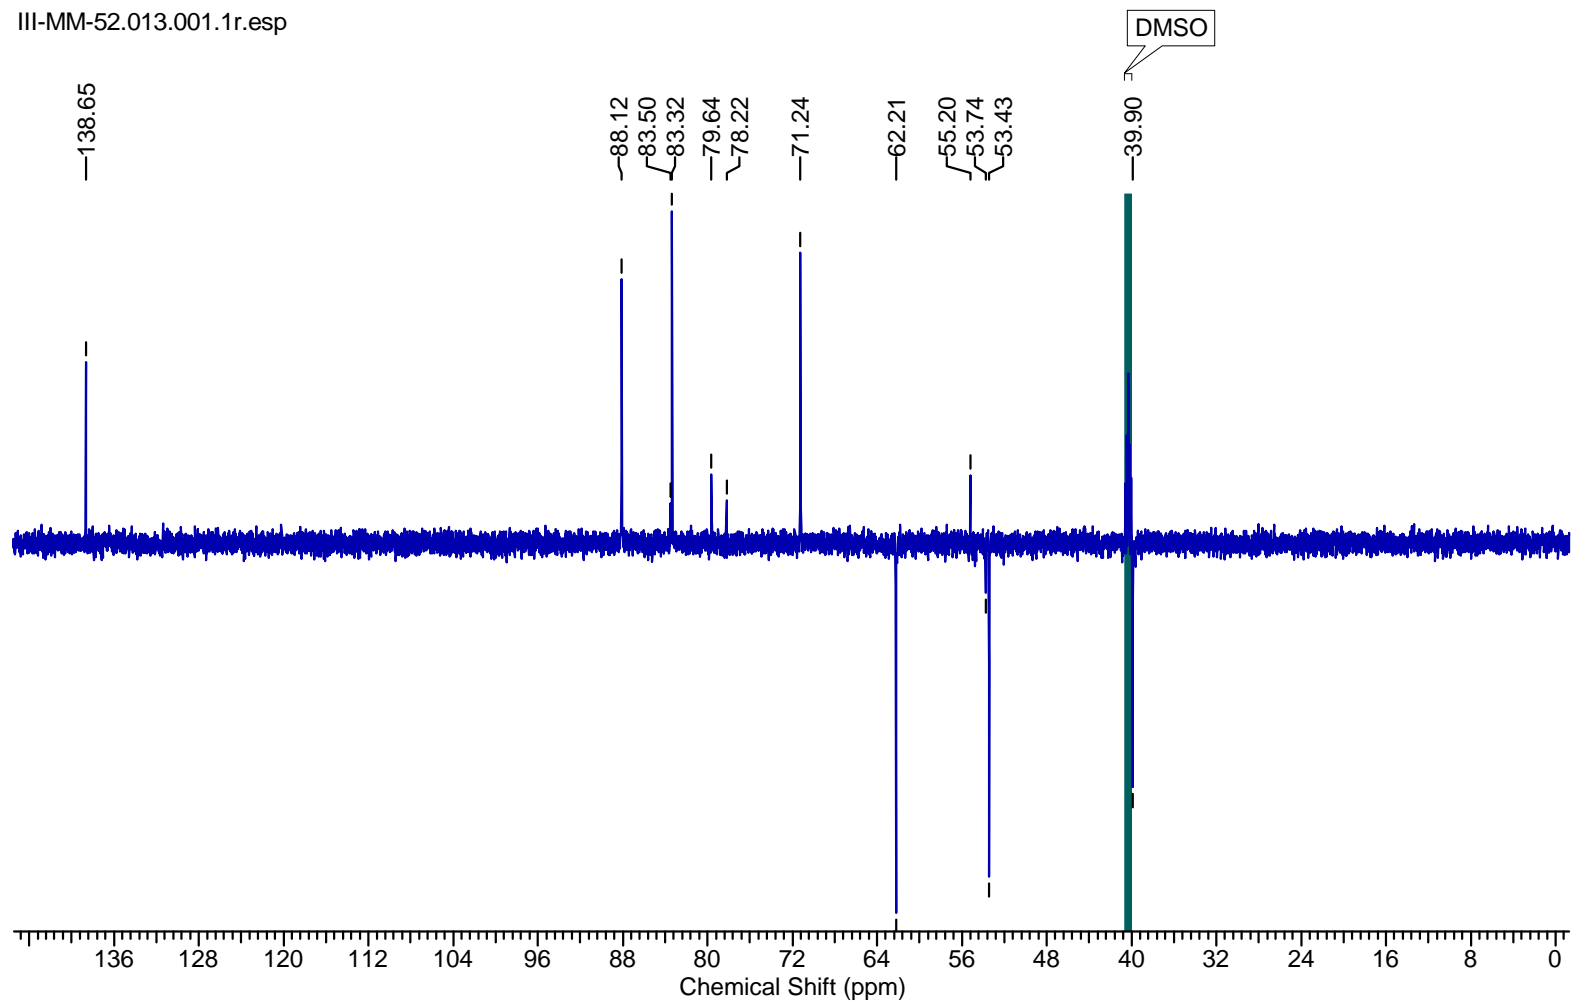

*Figure S76.* DEPT-135 spectrum of compound **16**.



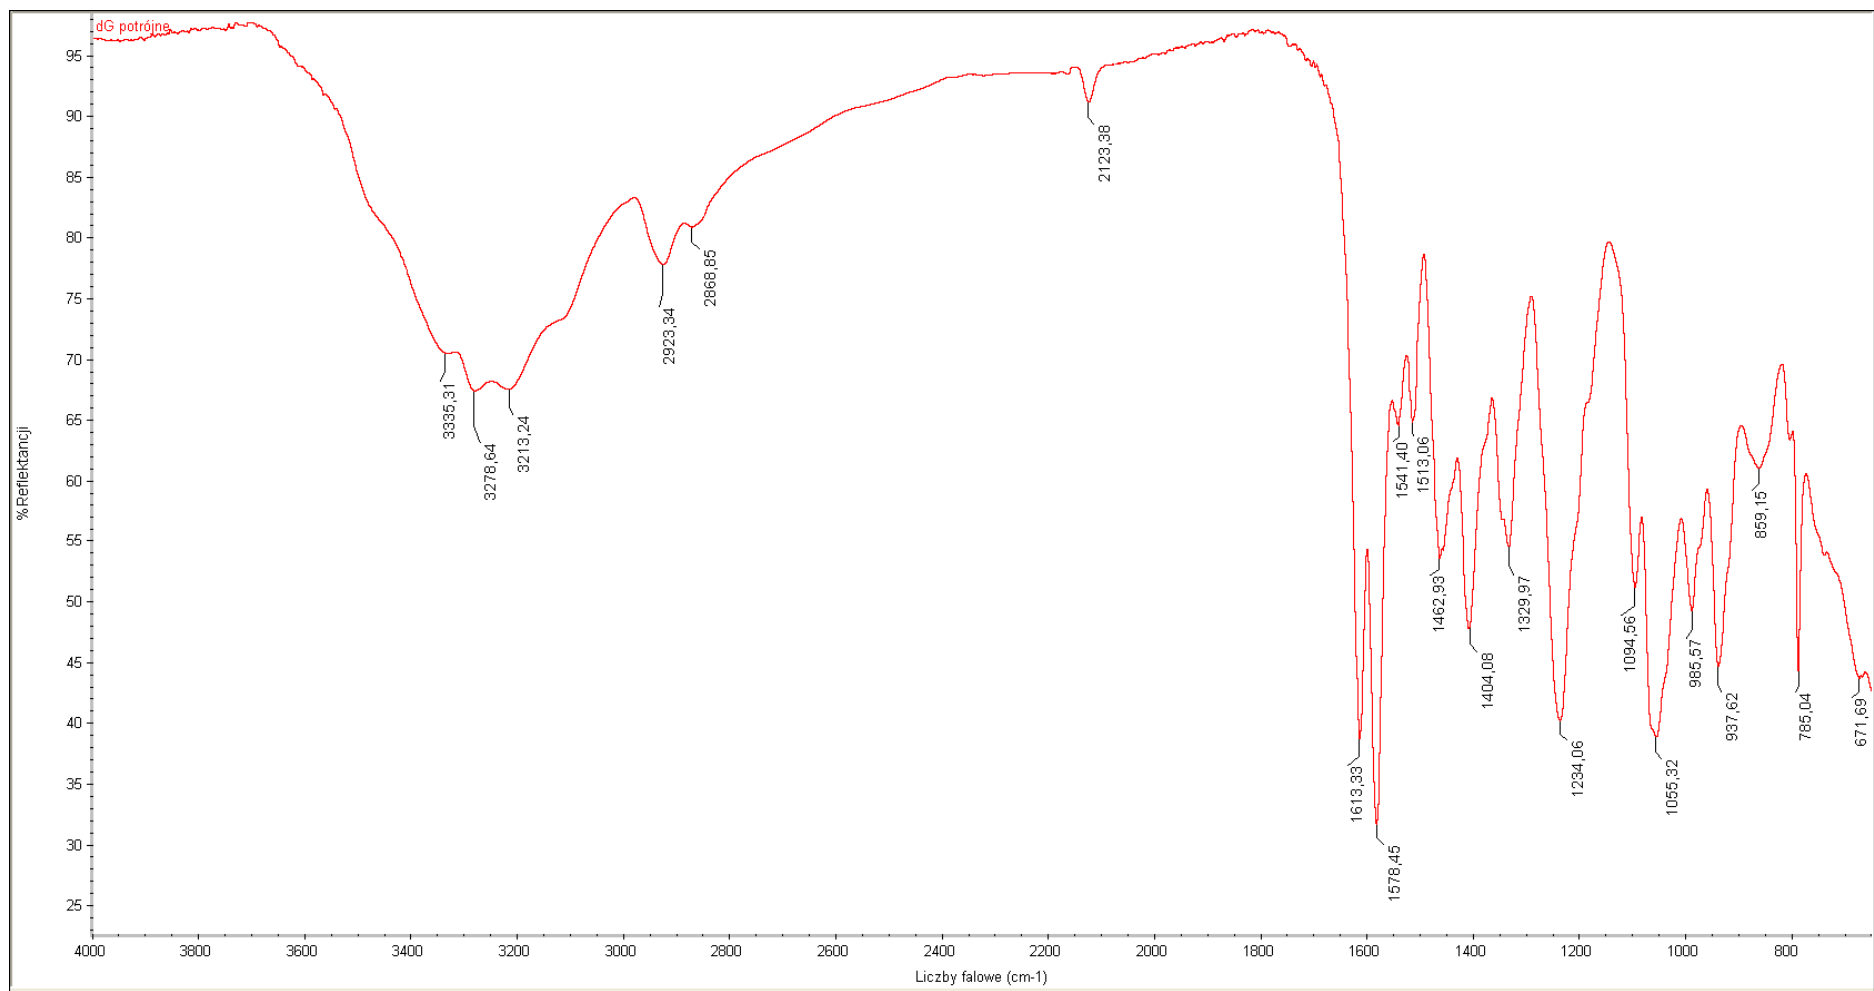

**Figure S77.** IR spectrum of compound **16**.

SPEC: ax5301bm\_a                    30-May-12    REG : 00:16.4    #9  
 Samp: III-MM-8(I)                    Start : 14:12:22    10  
 Comm: LSI, Cs+ 13 keV, gly  
 Mode: FAB +VE +LMR    BSCAN (EXP) UP LR NRM    Study : MS CBM1M PAN Lodz  
 Oper: ed                    Client: IBM A.Olejniczak    Inlet :  
 Base: 190.1                    Inten : 116696                    Masses: 100 > 1000  
 Norm: 190.1                    RIC : 590540                    #peaks: 335  
 Peak: 1000.00 mmu  
 Data: +1>10

SPEC: ax5301bm\_b                    30-May-12    REG : 00:16.4    #9  
 Samp: III-MM-8(I)                    Start : 14:17:26    10  
 Comm: LSI, Cs+ 13 keV, gly  
 Mode: FAB -VE -LMR    BSCAN (EXP) UP LR NRM    Study : MS CBM1M PAN Lodz  
 Oper: ed                    Client: IBM A.Olejniczak    Inlet :  
 Base: 266.2                    Inten : 107778                    Masses: 100 > 1000  
 Norm: 266.2                    RIC : 670737                    #peaks: 441  
 Peak: 1000.00 mmu  
 Data: +1>10

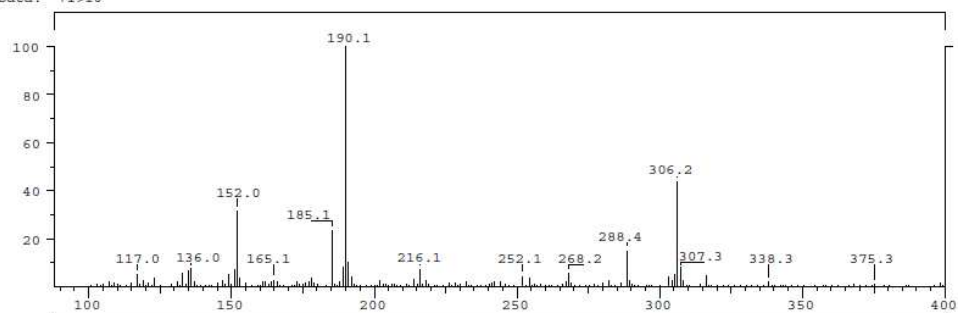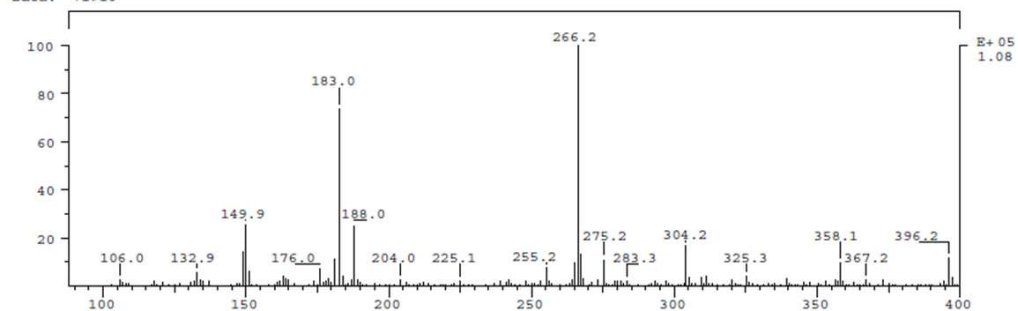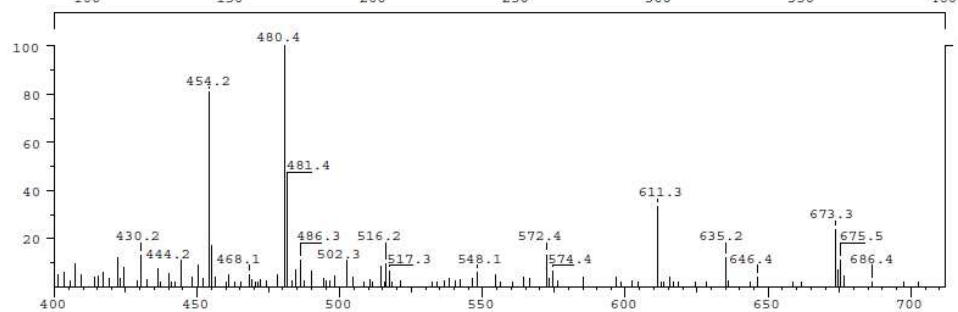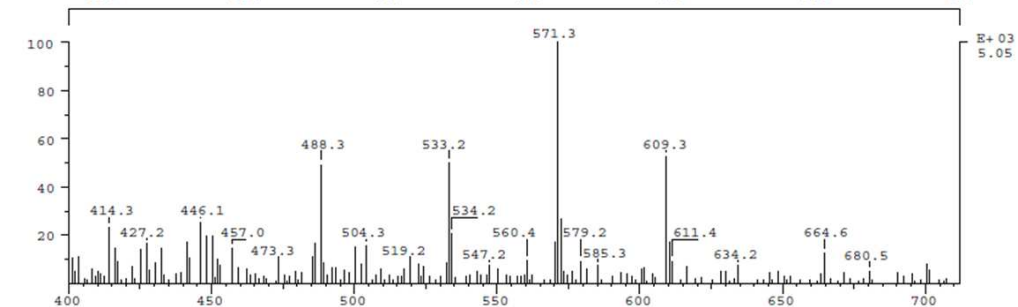

**Figure S78.** MS-FAB spectra of compound 16.

I-MM-dG-potrojne-trytyl.001.001.1r.esp

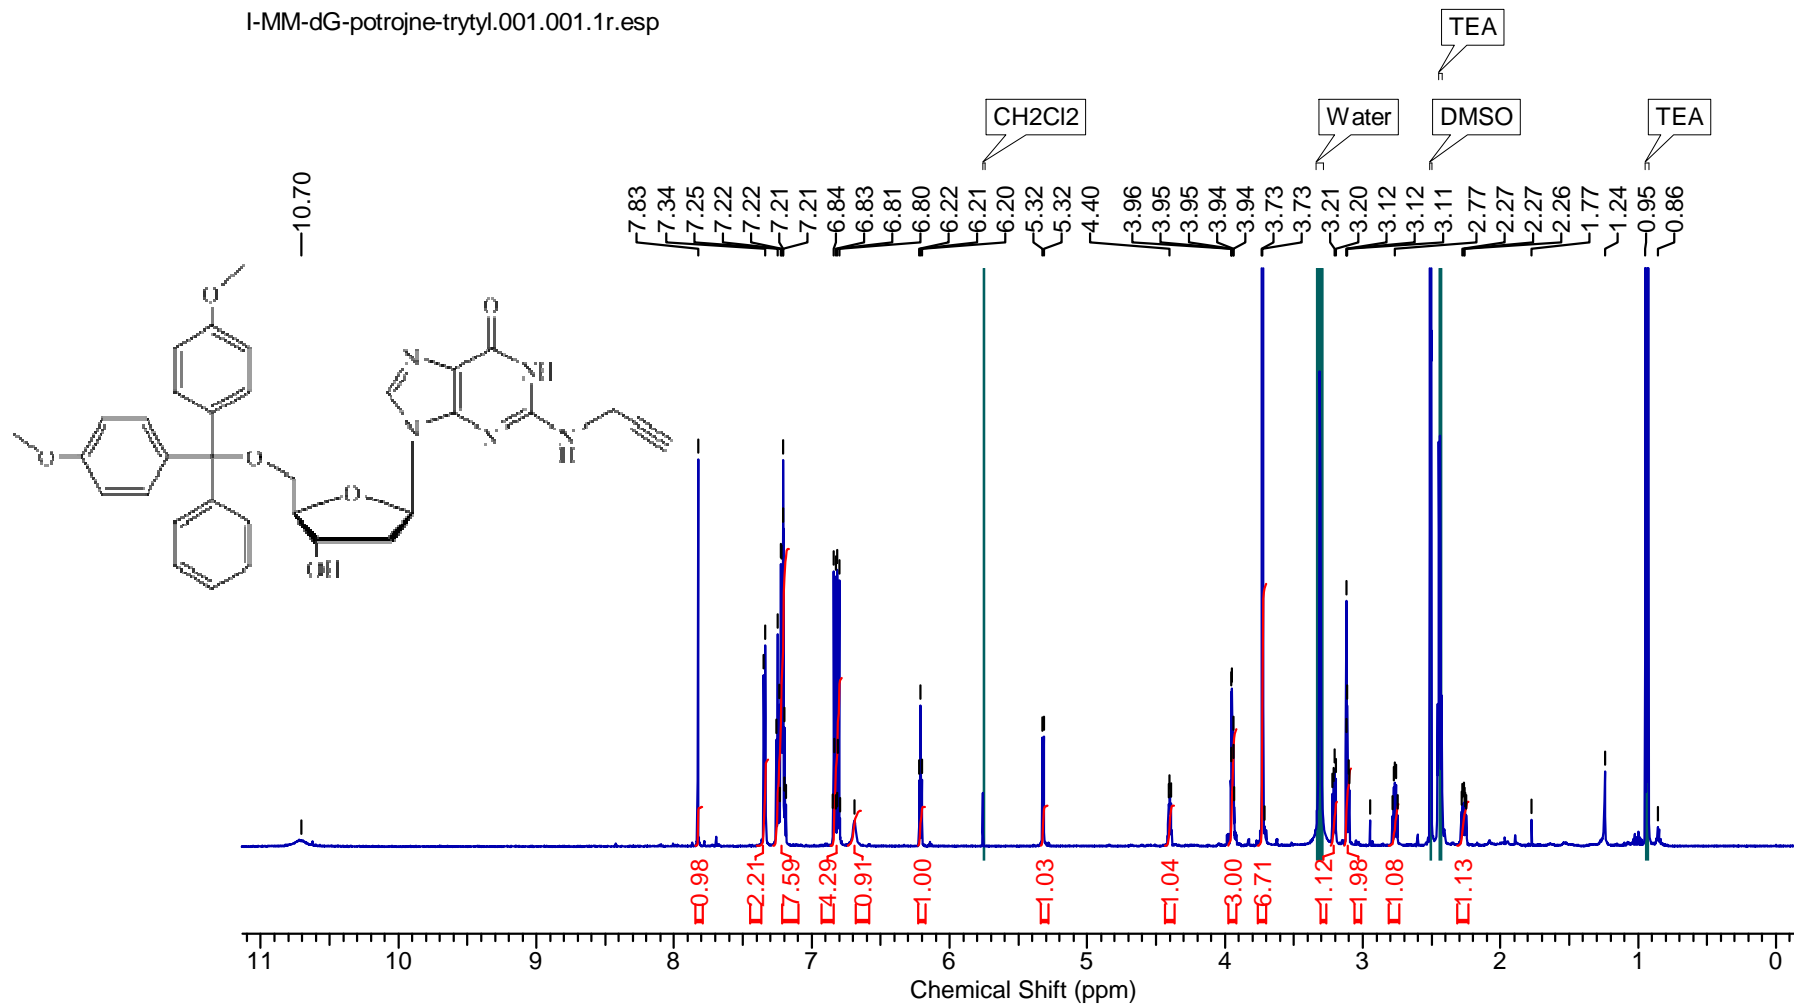

Figure S79. <sup>1</sup>H NMR spectrum of compound 17.

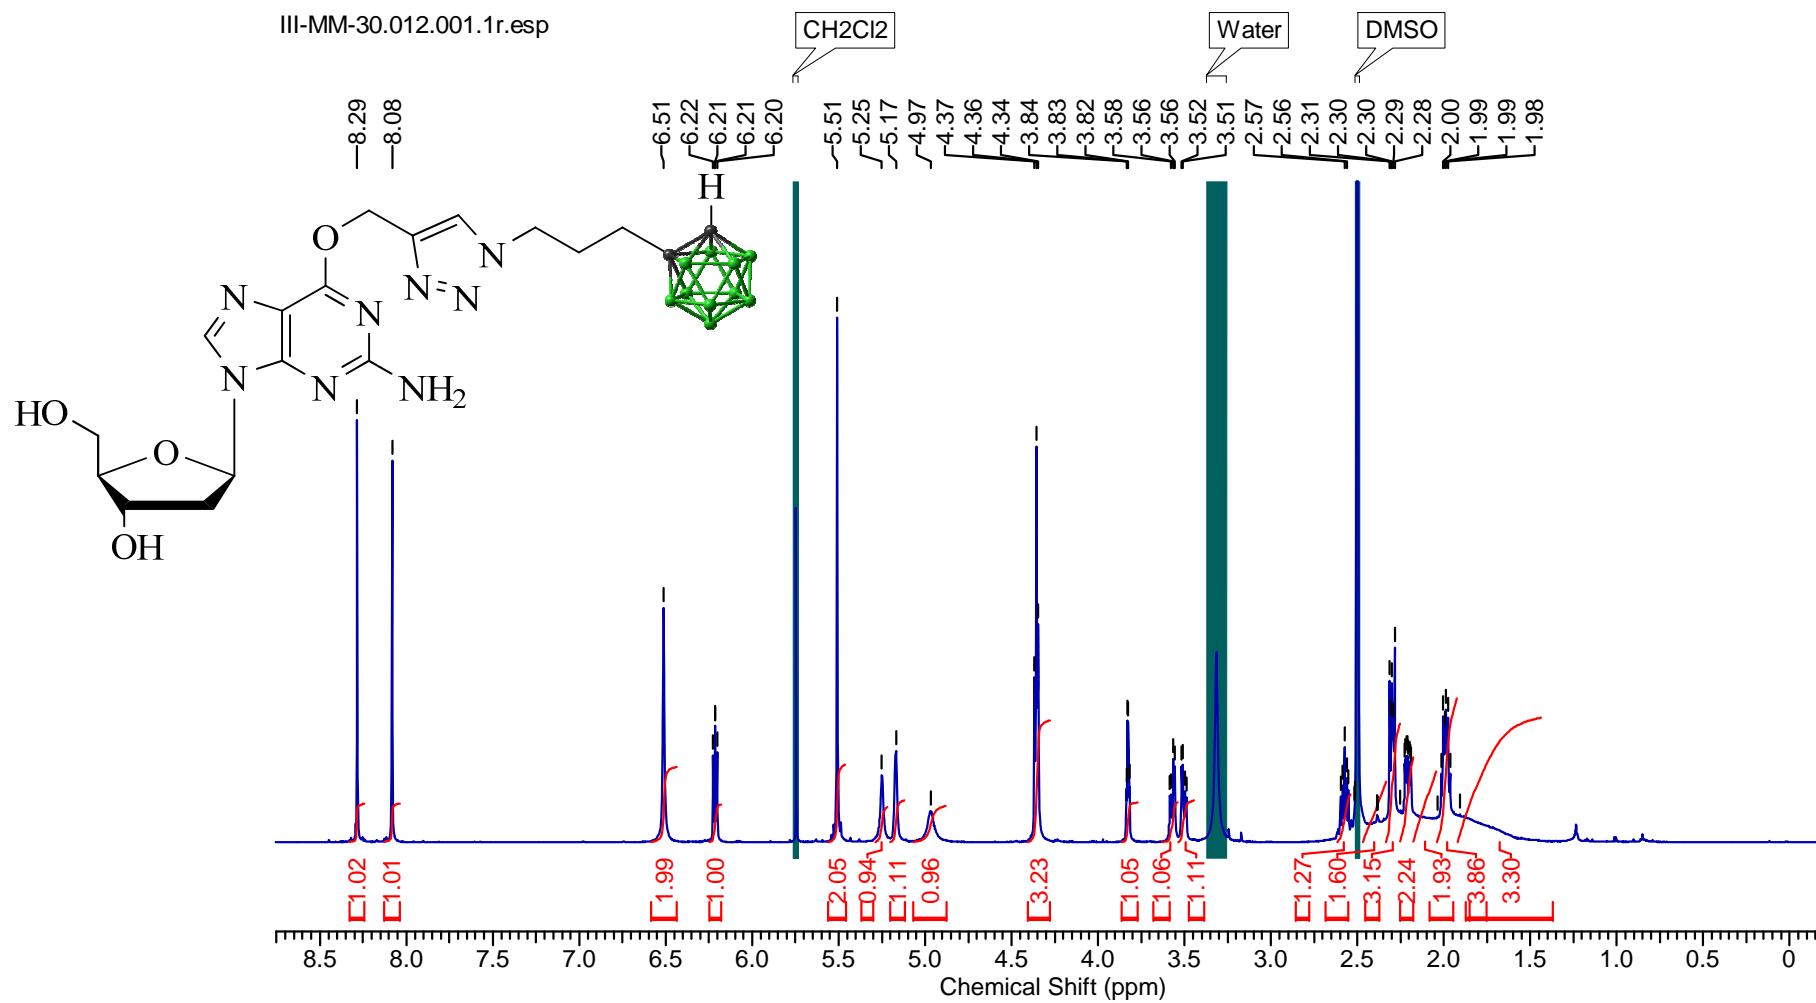

Figure S80. <sup>1</sup>H NMR spectrum of compound 26.

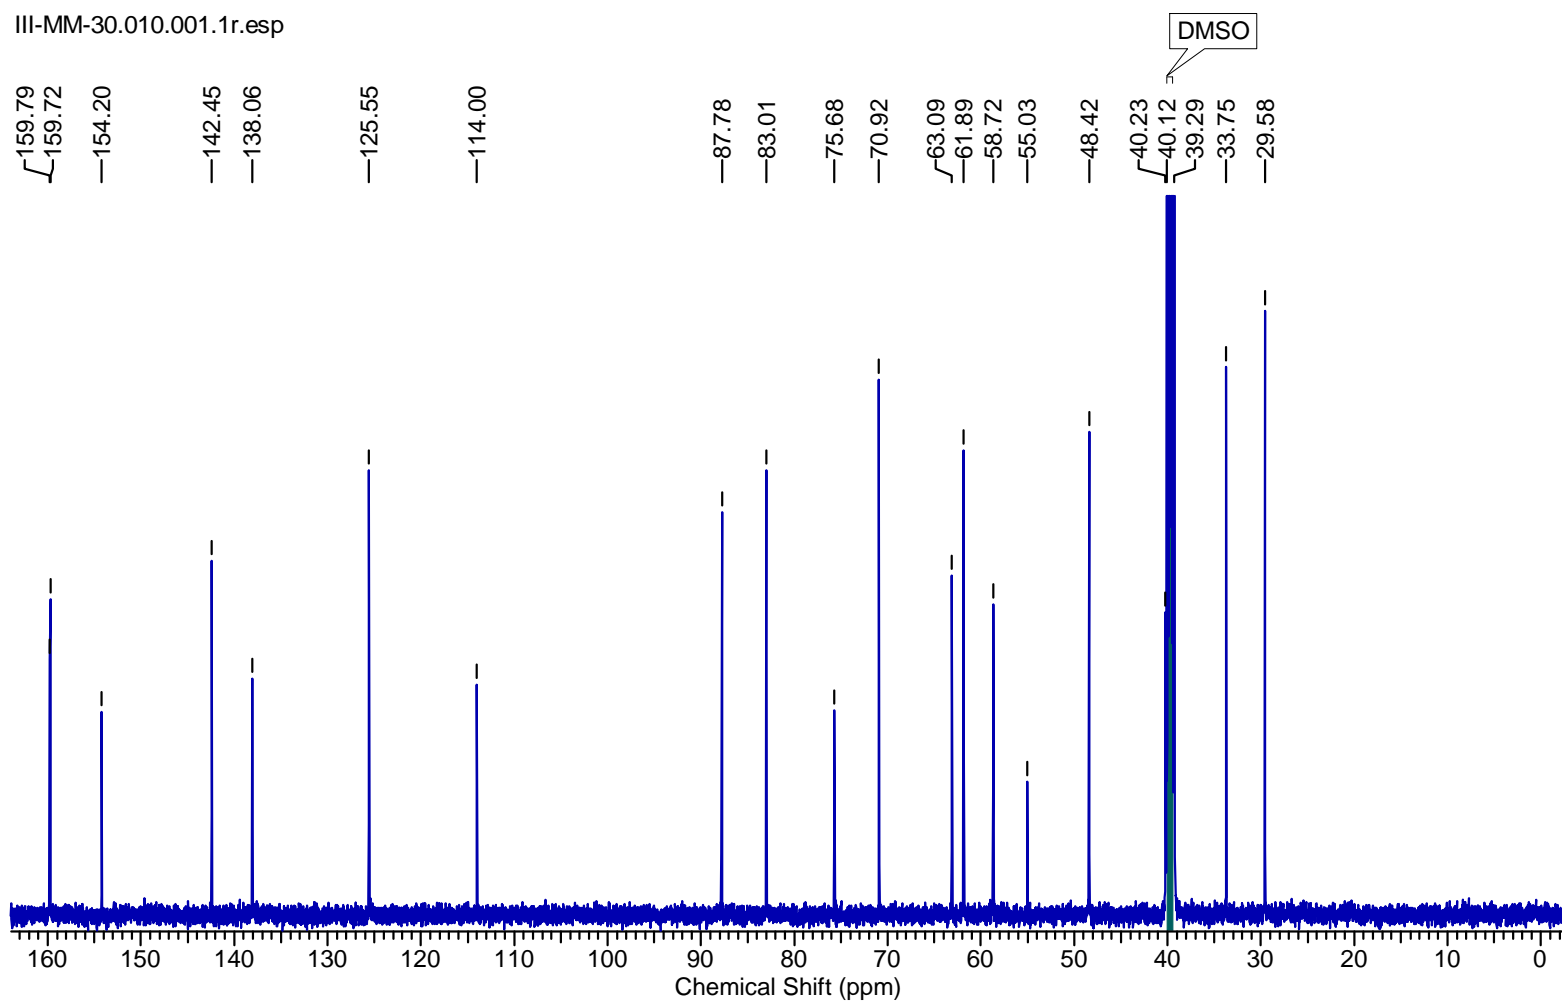

*Figure S81.*  $^{13}\text{C}$  NMR spectrum of compound **26**.

III-MM-30.011.001.1r.esp

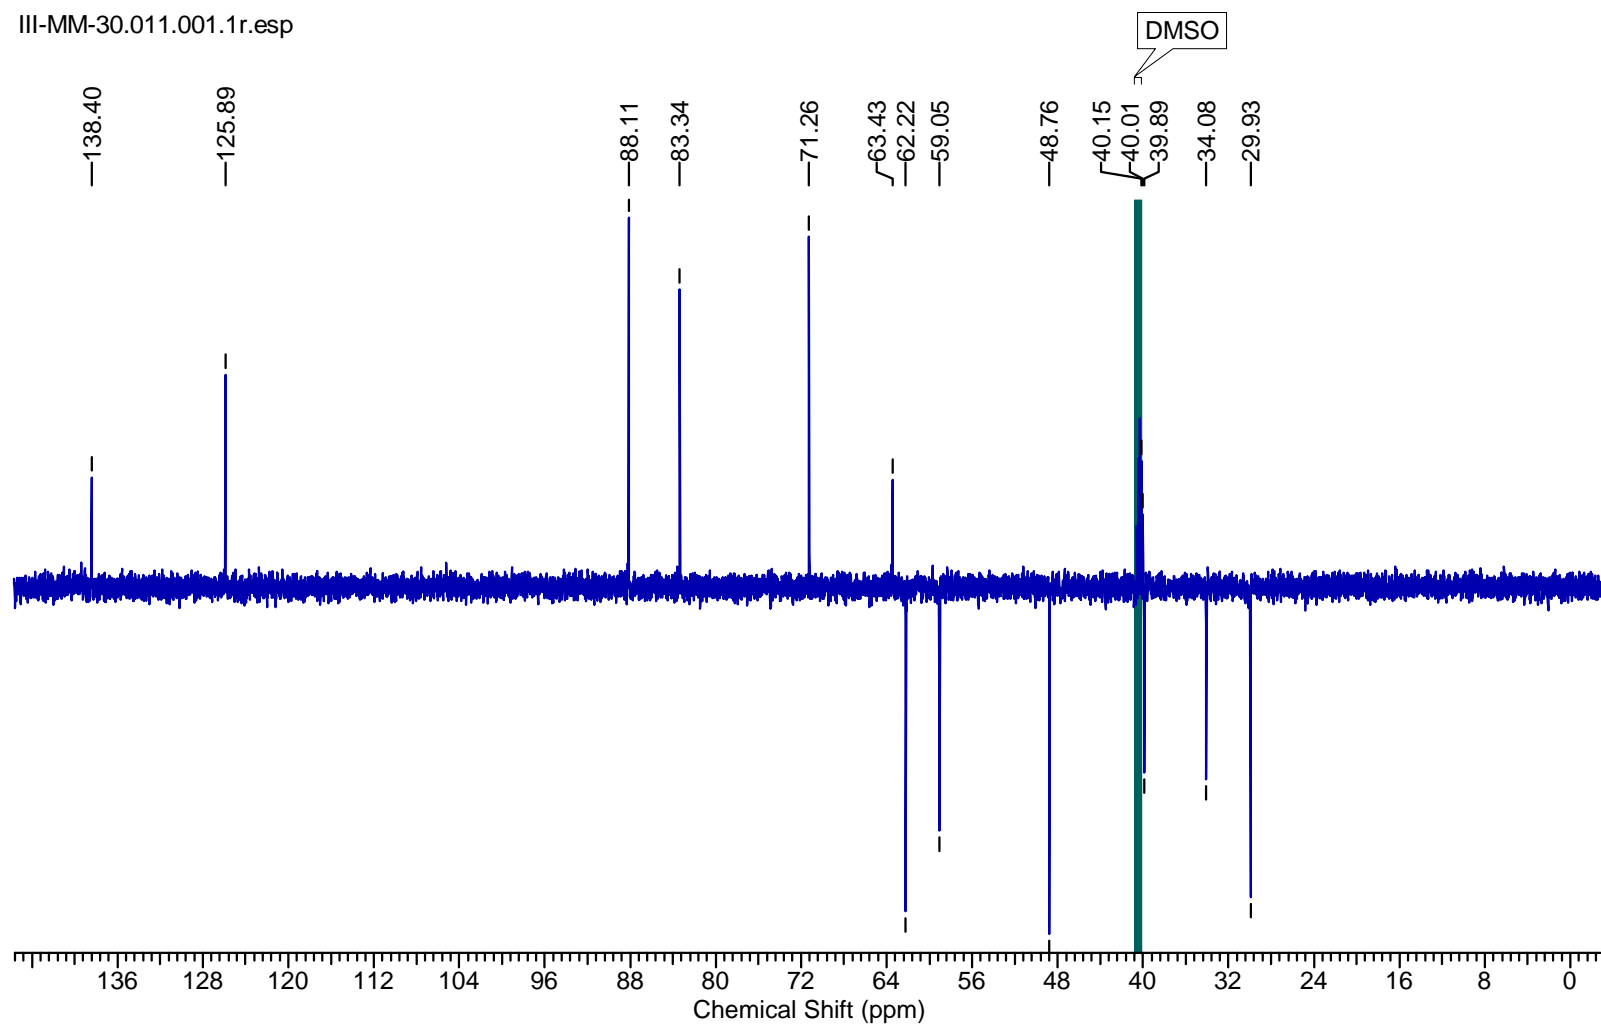

*Figure S82.* DEPT-135 spectrum of compound **26**.

III-MM-30-BOR.004.001.1r.esp

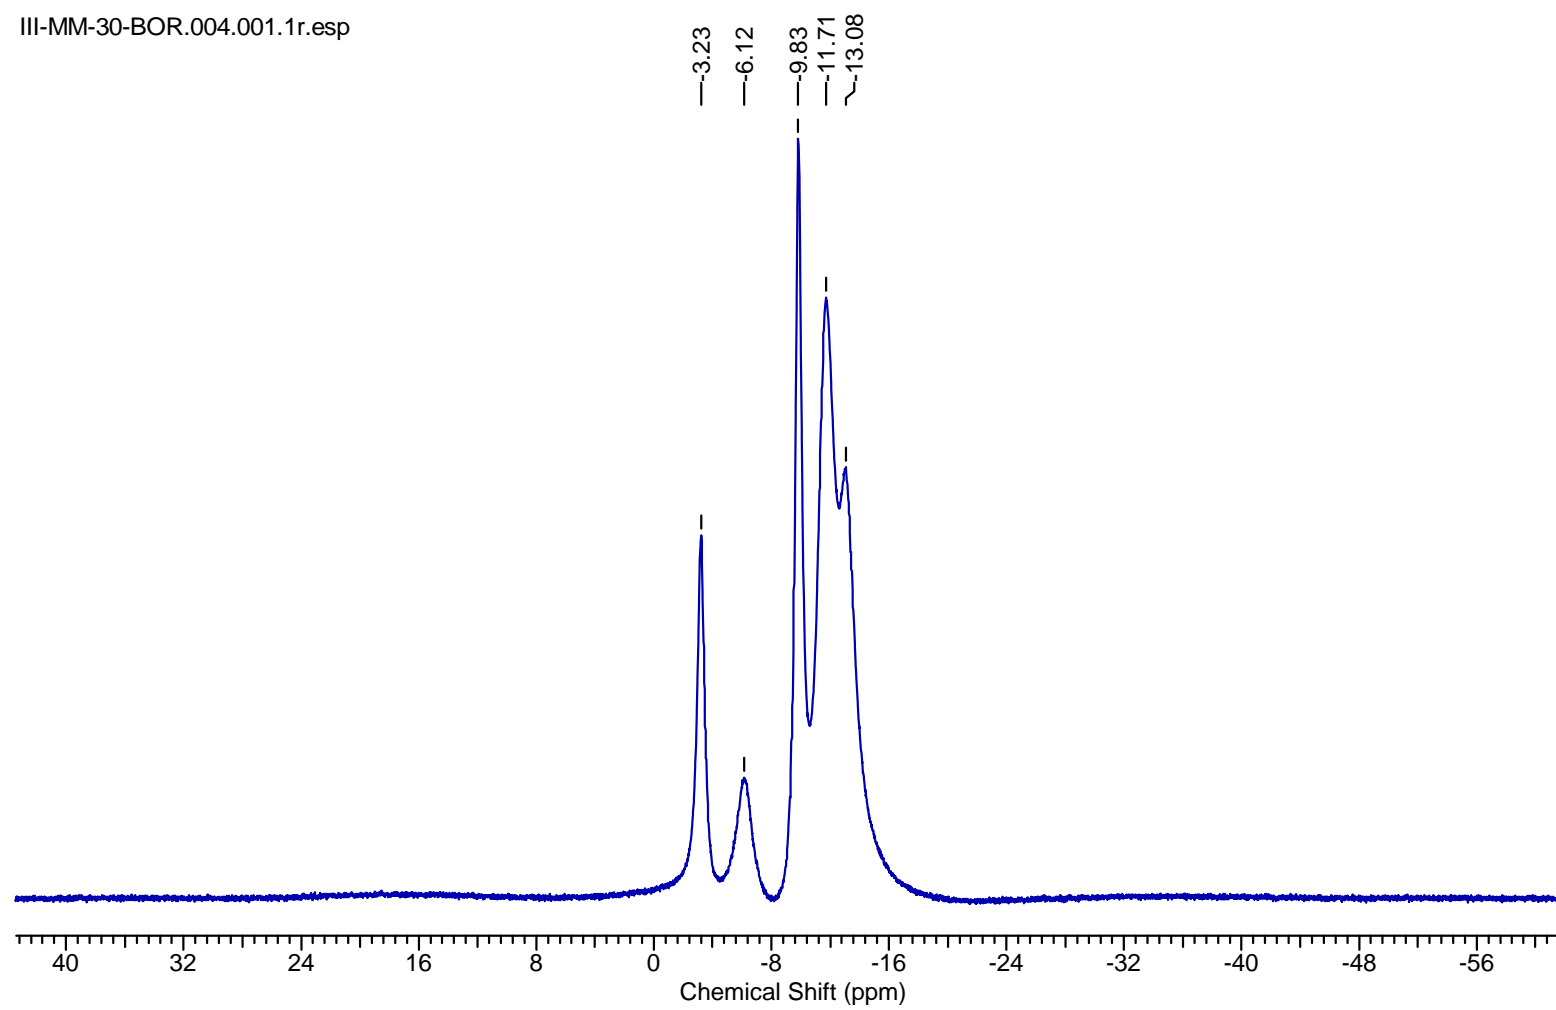

*Figure S83.*  $^{11}\text{B}\{^1\text{H BB}\}$  NMR spectrum of compound **26**.

III-MM-30-BOR.005.001.1r.esp

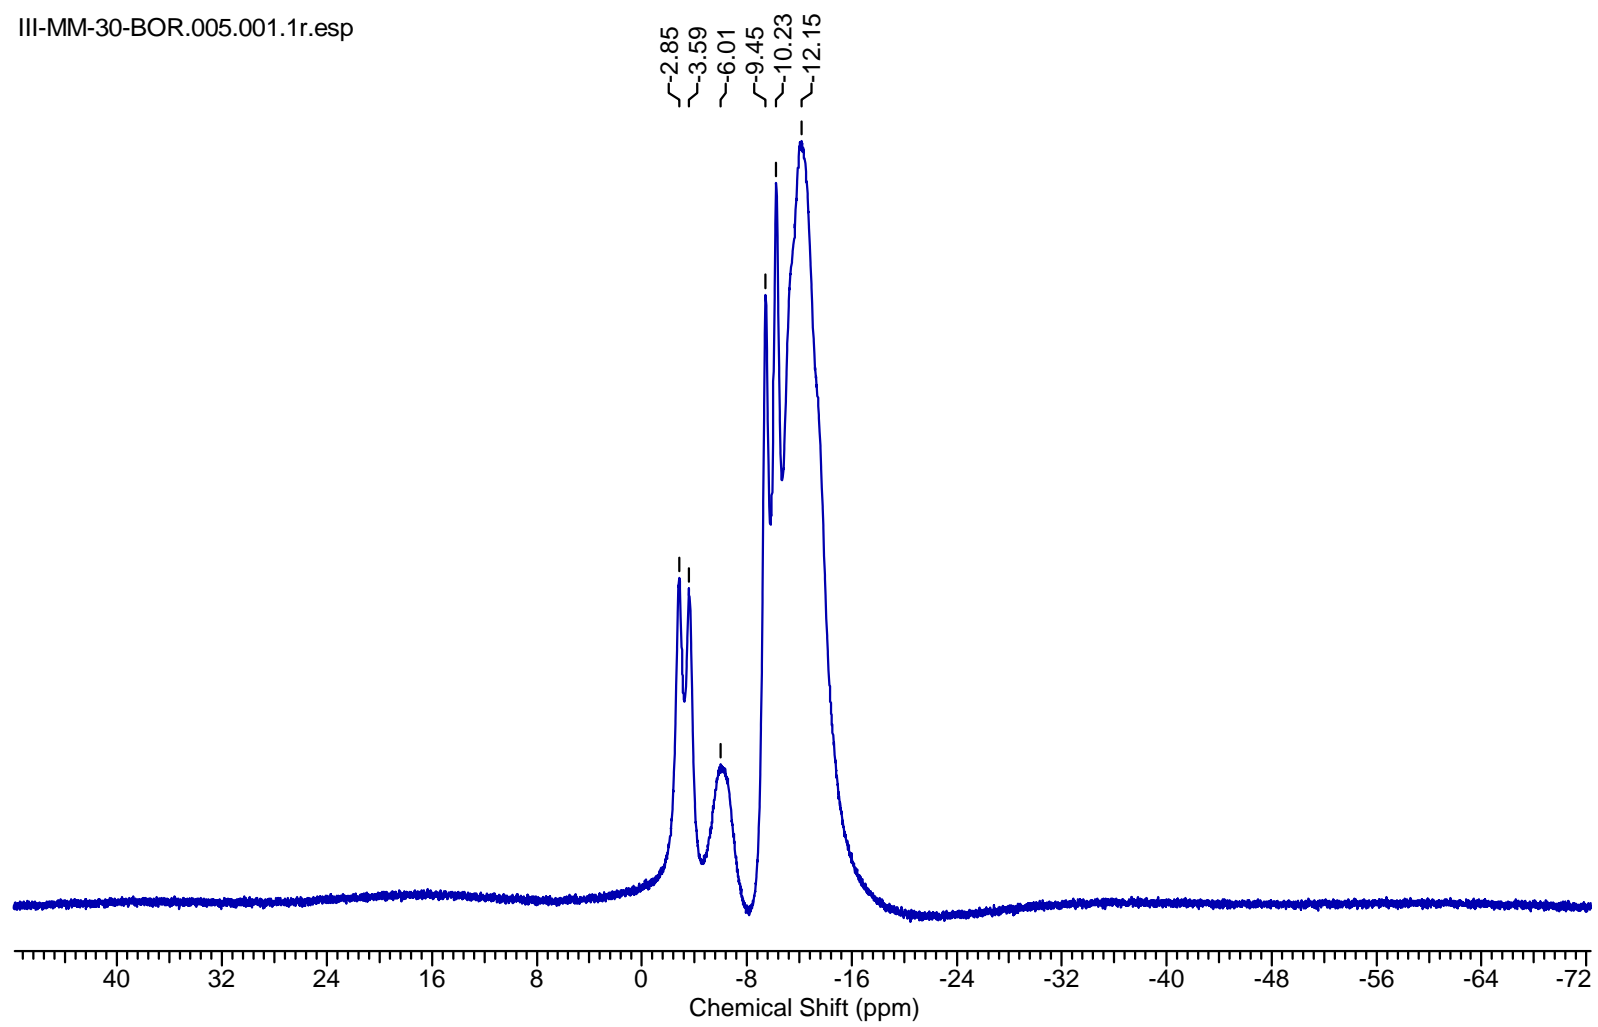

*Figure S84.*  $^{11}\text{B}$  NMR spectrum of compound **26**.



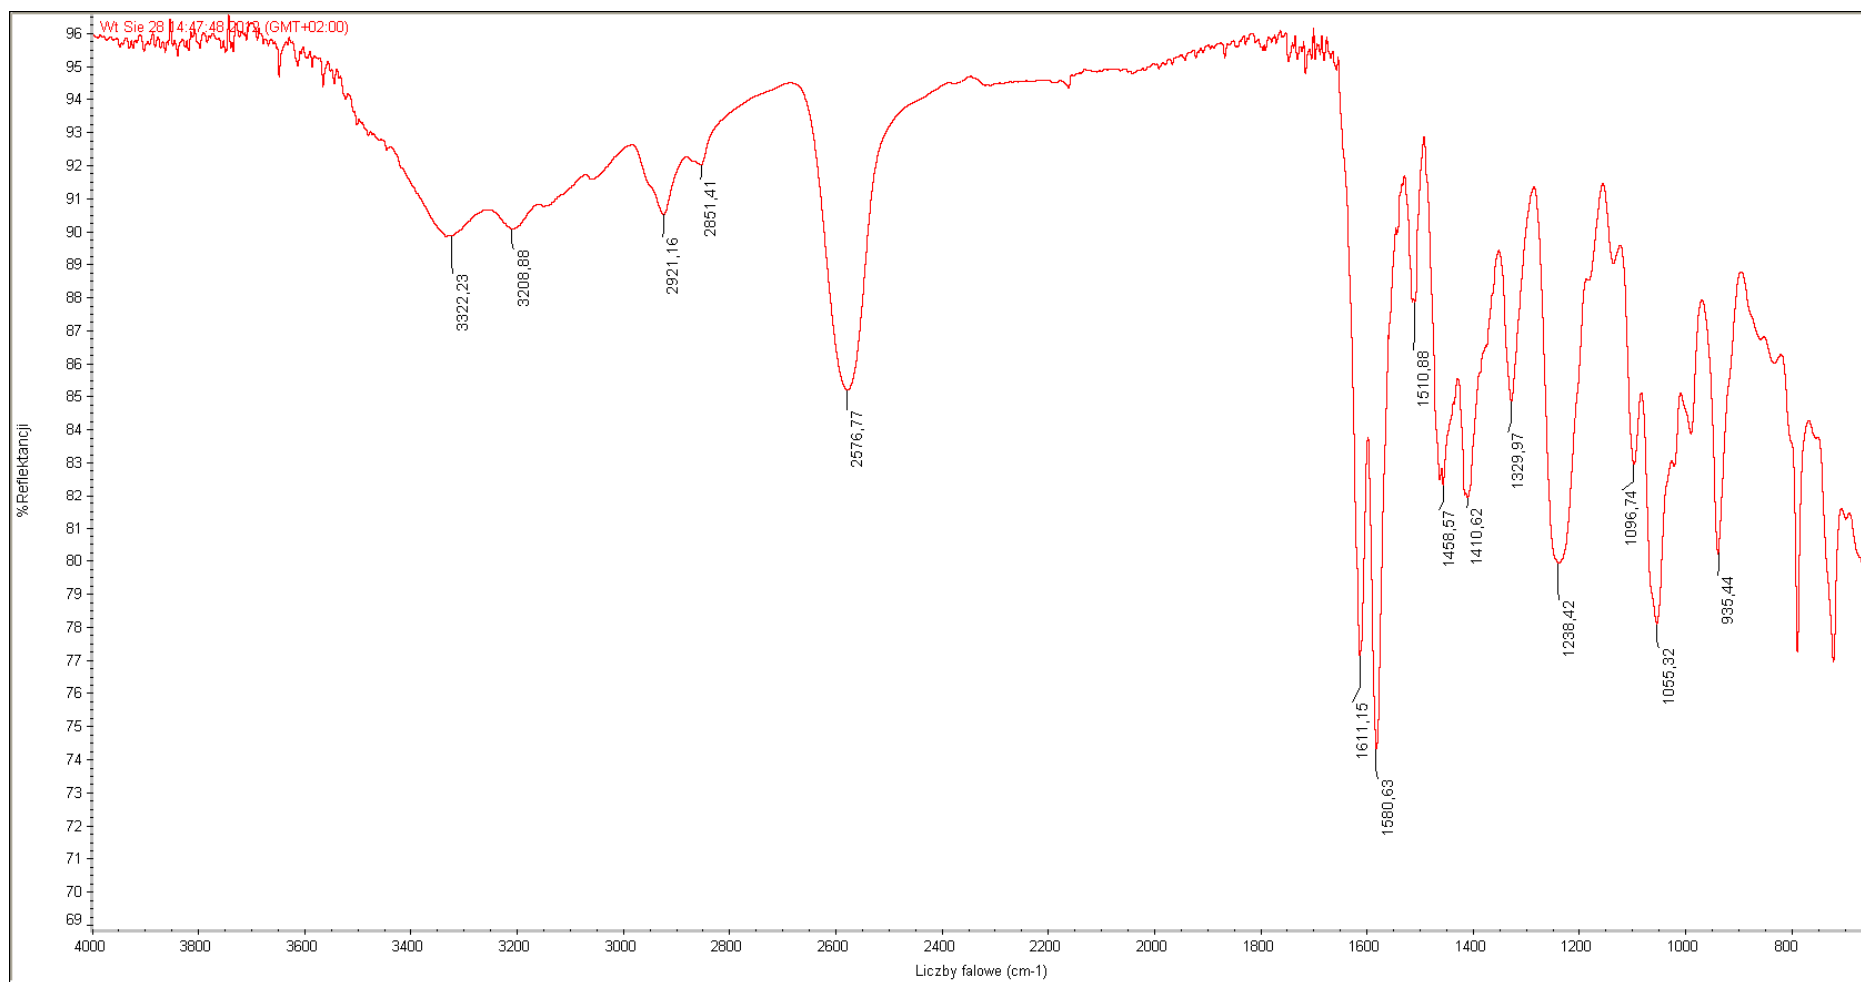

**Figure S85.** IR spectrum of compound **26**.

SPEC: ax501ibm                    24-May-12    REG : 00:16.4    #9  
 Samp: III-MM-10                    Start : 14:39:56    10  
 Comm: LSI, Cs+ 13 keV, gly  
 Mode: FAB +VE +LMR    BSCAN (EXP) UP LR NRM            Study : MS CBMIM PAN Lodz  
 Oper: ed                    Client: IBM A.Olejniczak            Inlet :  
 Base: 152.0                    Inten : 477149            Masses: 100 > 1000  
 Norm: 152.0                    RIC : 3061969            #peaks: 698  
 Peak: 1000.00 mmu  
 Data: +1>10

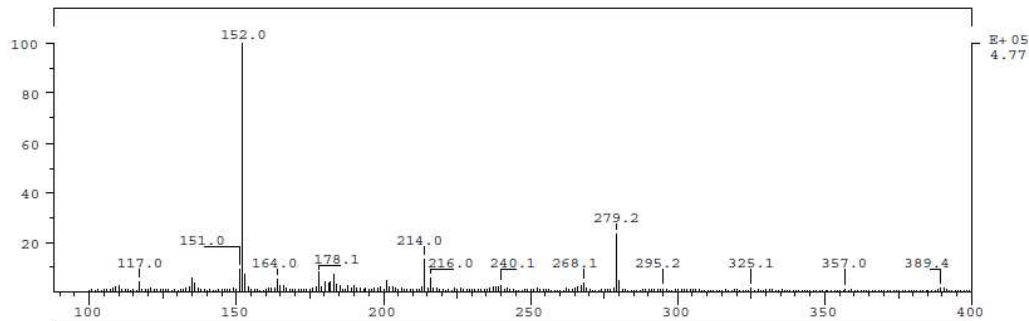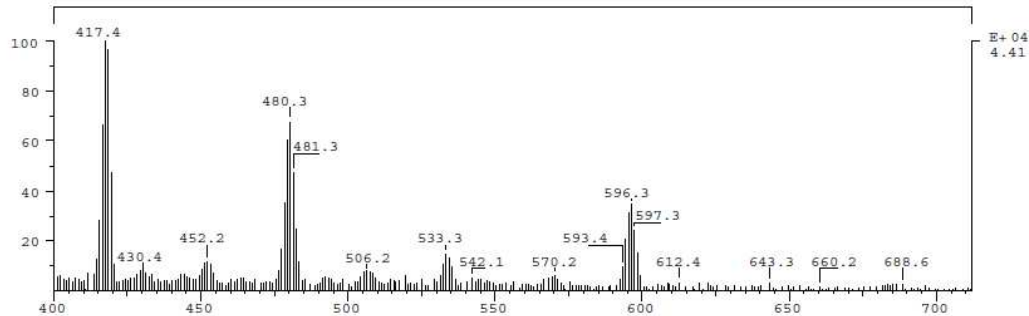

SPEC: ax501ibm\_a                    24-May-12    REG : 00:16.4    #9  
 Samp: III-MM-10                    Start : 14:45:25    10  
 Comm: LSI, Cs+ 13 keV, gly  
 Mode: FAB -VE -LMR    BSCAN (EXP) UP LR NRM            Study : MS CBMIM PAN Lodz  
 Oper: ed                    Client: IBM A.Olejniczak            Inlet :  
 Base: 183.0                    Inten : 52825            Masses: 100 > 1000  
 Norm: 183.0                    RIC : 466151            #peaks: 372  
 Peak: 1000.00 mmu  
 Data: +1>10

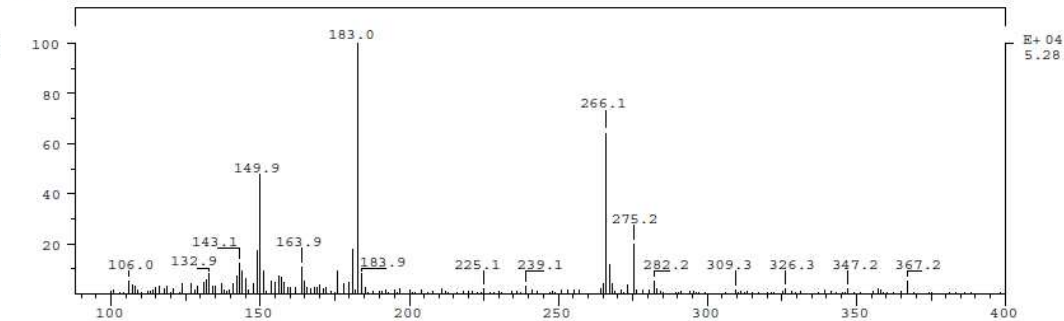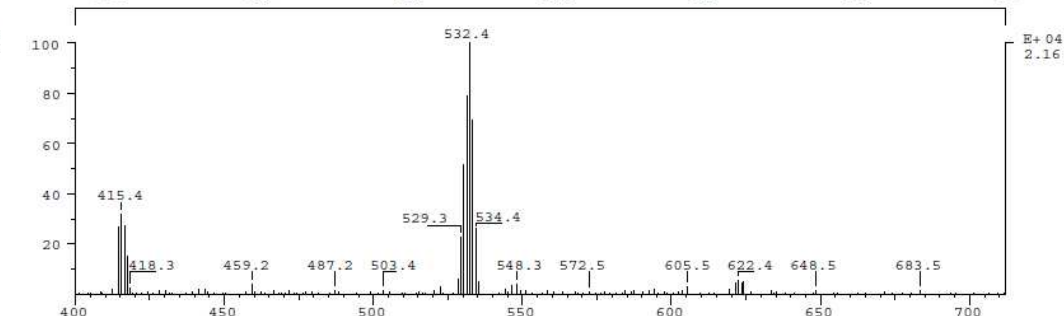

**Figure S86.** MS-FAB spectra of compound **26**.

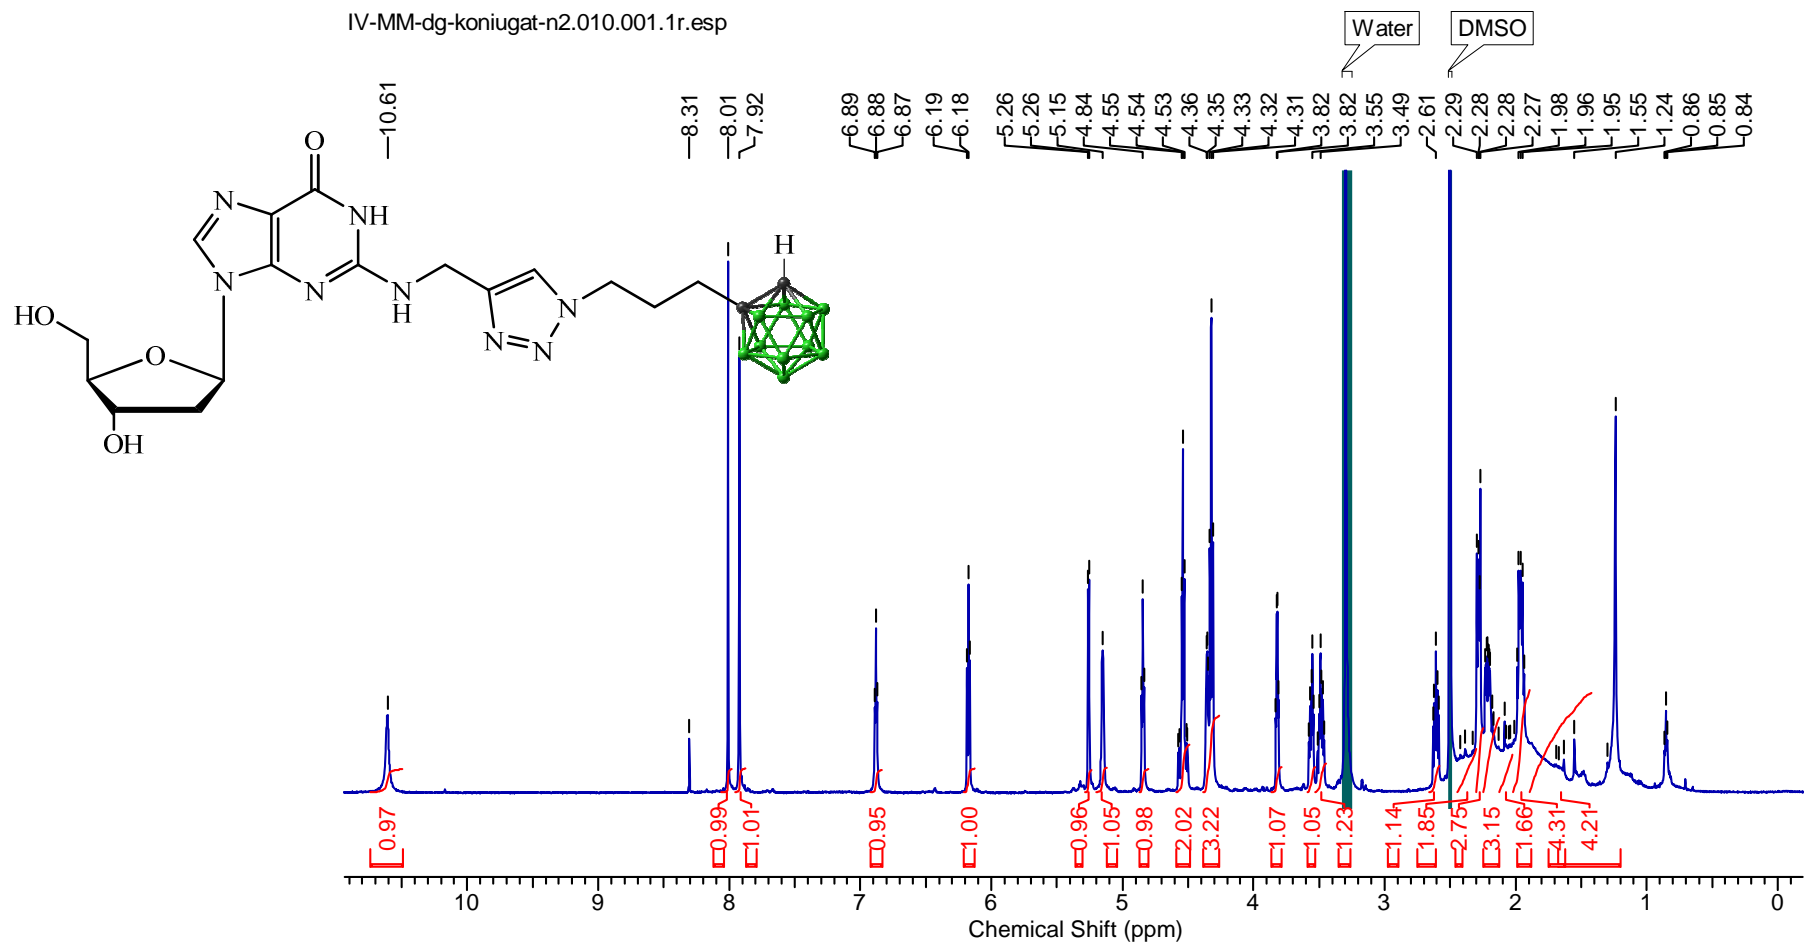

Figure S87.  $^1\text{H}$  NMR spectrum of compound 27.

IV-MM-dg-koniugat-n2.012.001.1r.esp

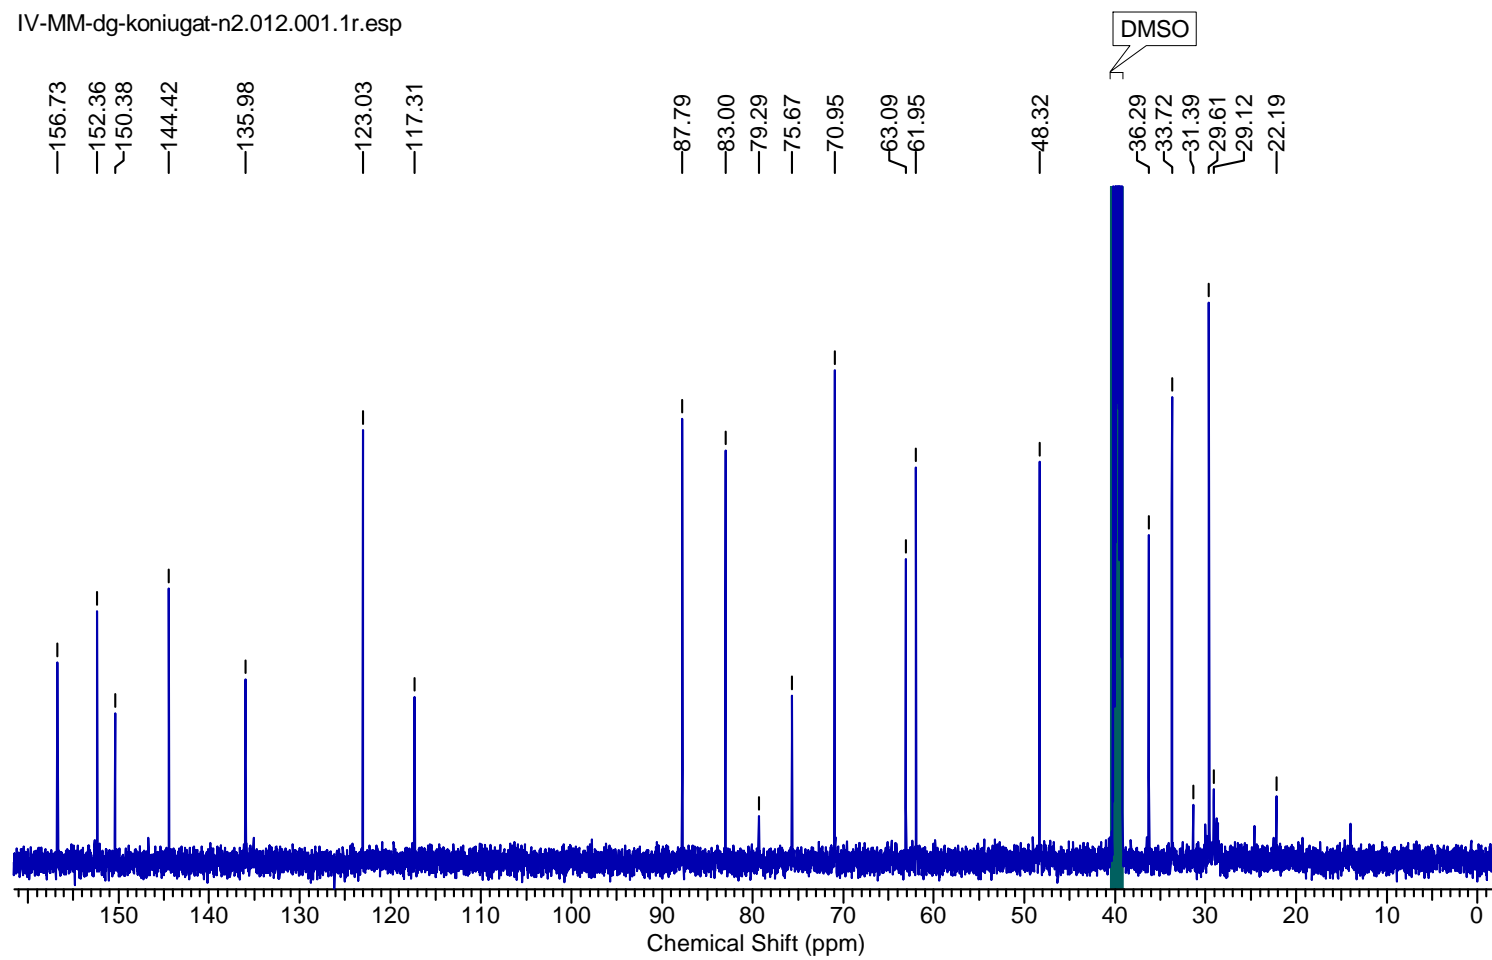

*Figure S88.*  $^{13}\text{C}$  NMR spectrum of compound **27**.

IV-MM-dg-koniugat-n2.013.001.1r.esp

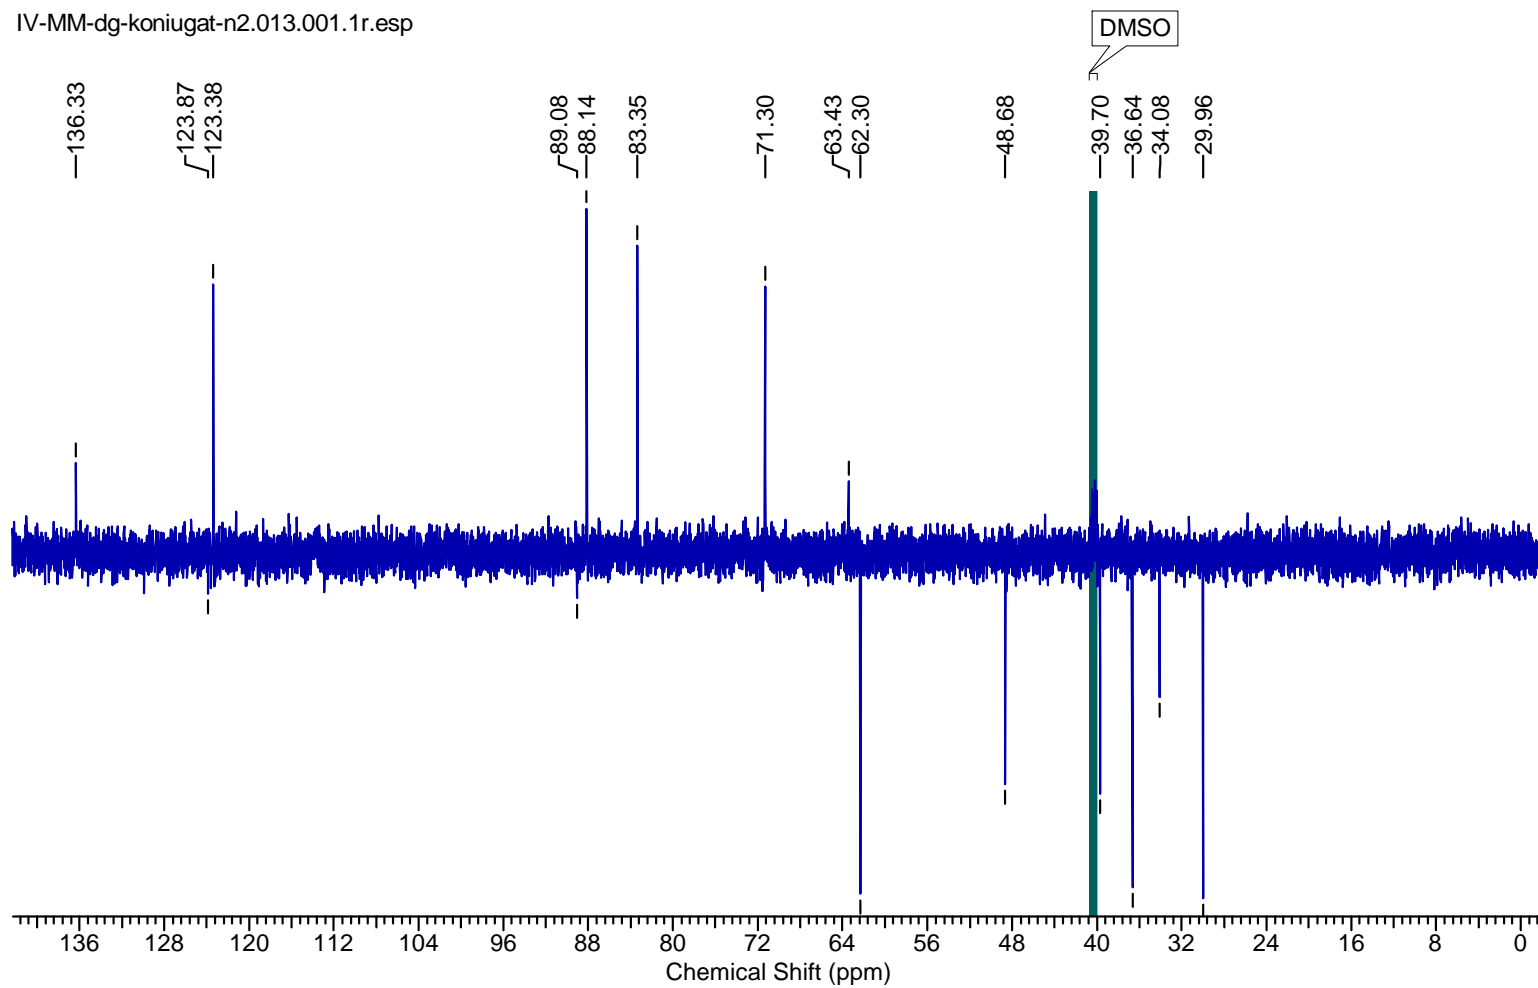

*Figure S89.* DEPT-135 spectrum of compound **27**.

IV-MM-amido-dg-koniugat-n2.007.001.1r.esp

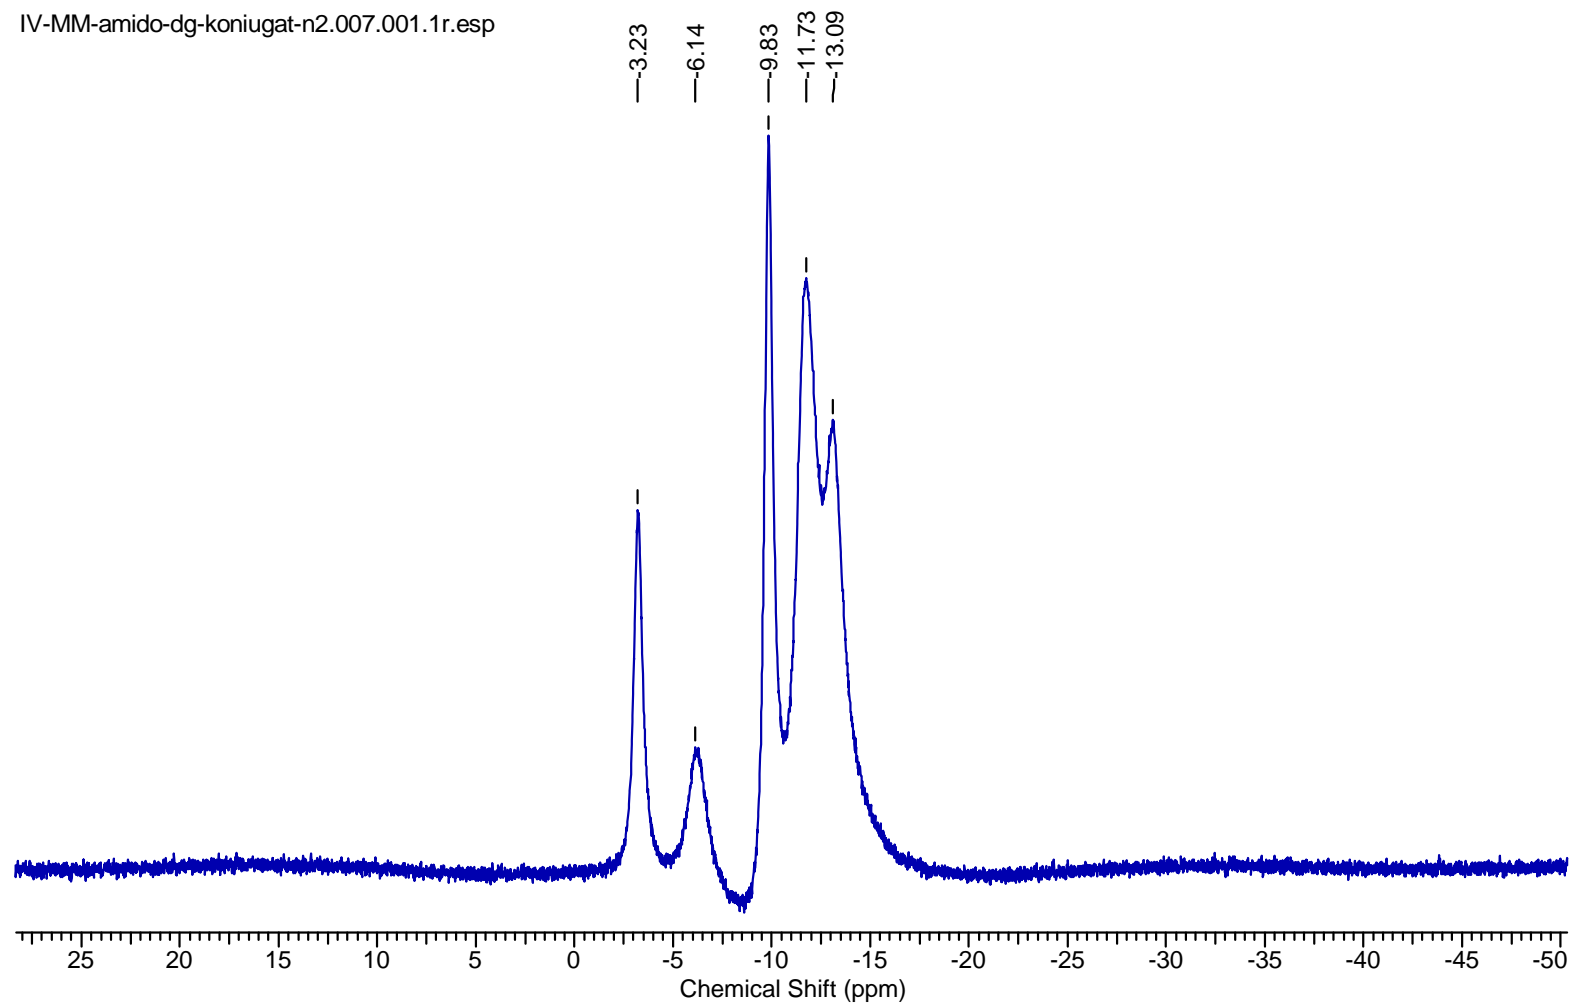

*Figure S90.*  $^{11}\text{B}\{^1\text{H BB}\}$  NMR spectrum of compound **27**.

IV-MM-amido-dg-koniugat-n2.008.001.1r.esp

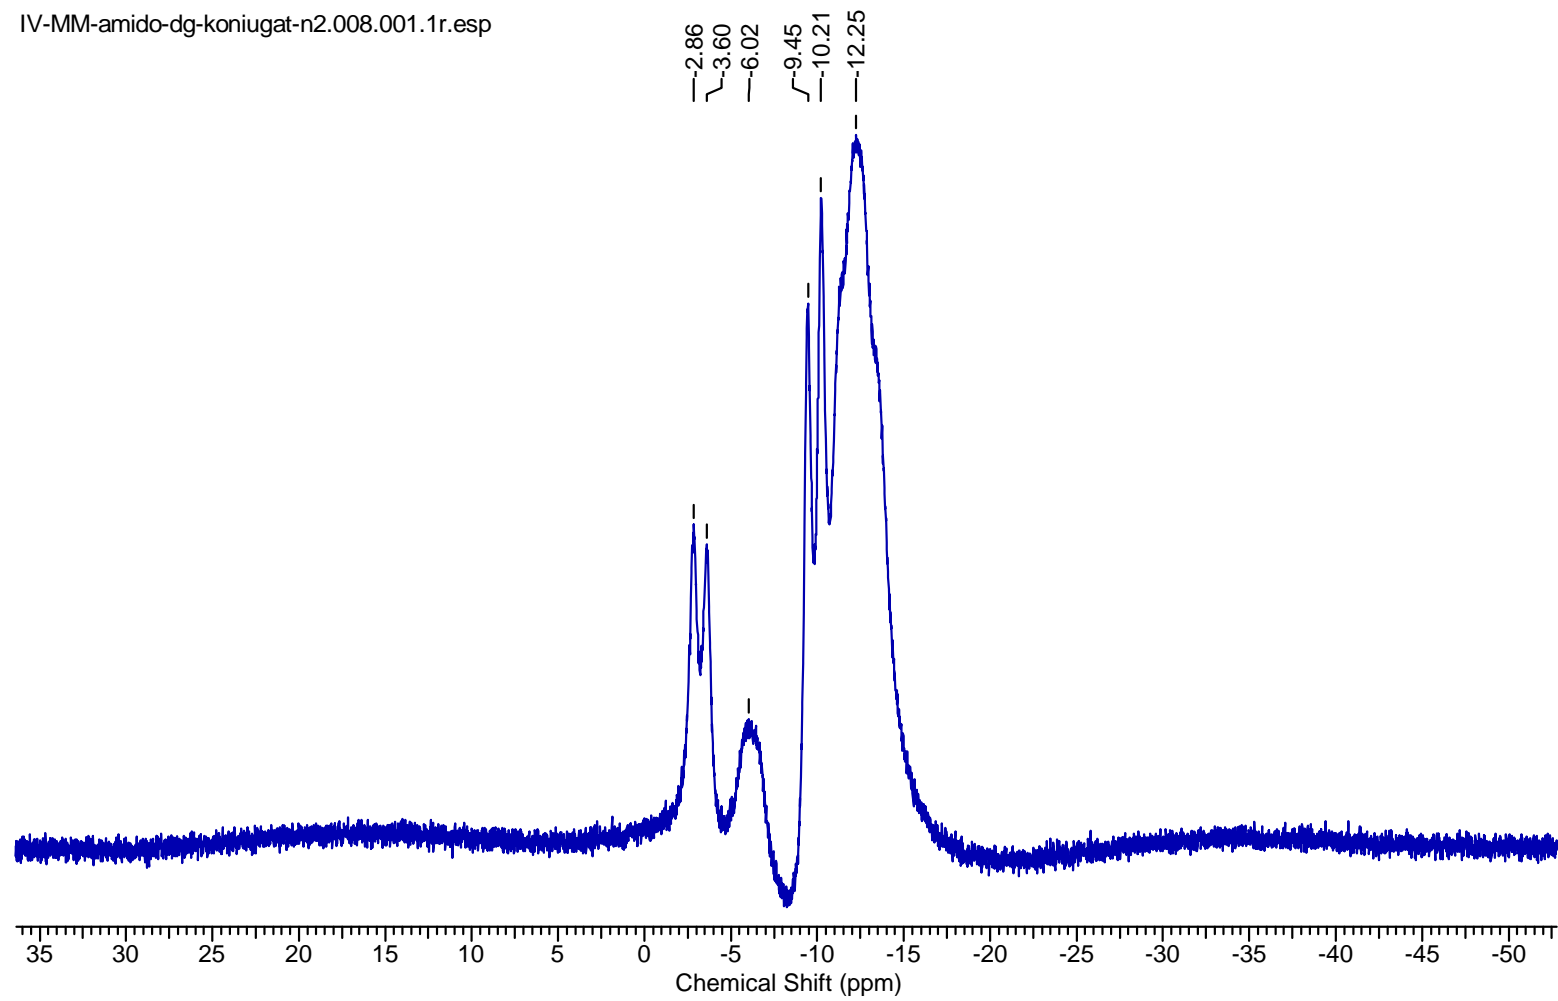

*Figure S91.*  $^{11}\text{B}$  NMR spectrum of compound **27**.

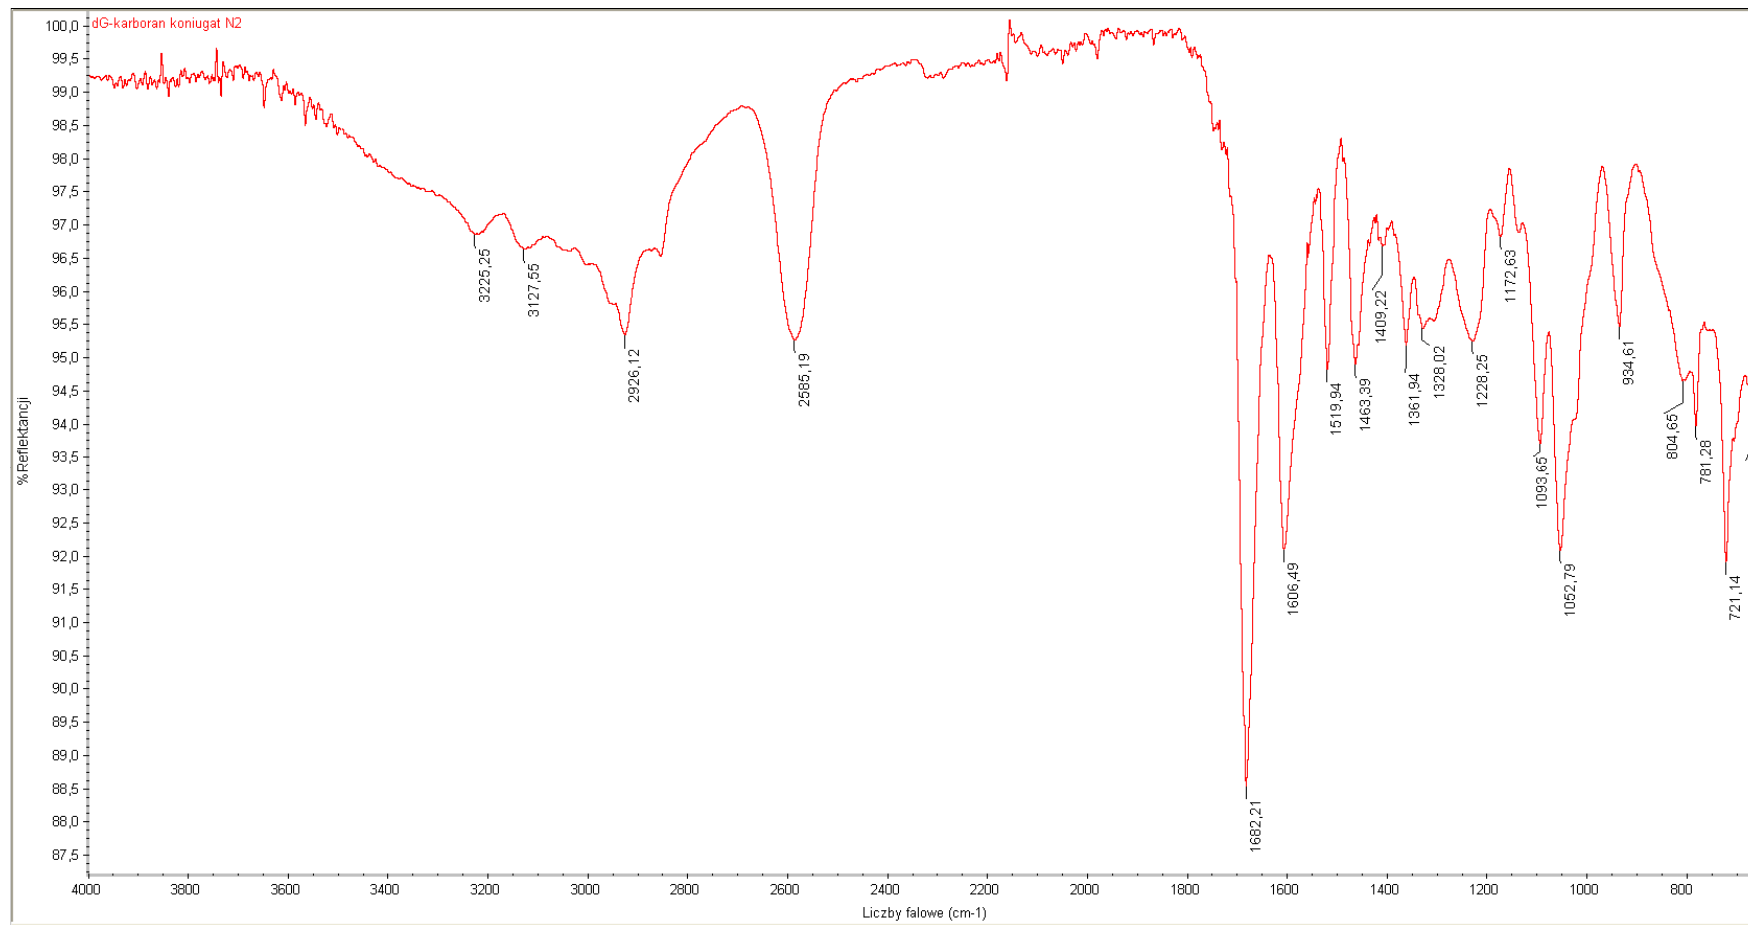

Figure S92. IR spectrum of compound 27.



SPEC: az437ibm 17-Dec-13 REG : 00:16.4 #9  
 Samp: dG-karboran-N2 Start : 13:52:10 10  
 Comm: LSI, Cs+ 13 keV, gly  
 Mode: FAB +VE +LMR BSCAN (EXP) UP LR NRM Study : MS CBMIM PAN Lodz  
 Oper: ub Client: IBM A.Olejniczak Inlet :  
 Base: 185.1 Inten : 260484 Masses: 100 > 1000  
 Norm: 185.1 RIC : 2689202 #peaks: 608  
 Peak: 1000.00 mmu  
 Data: +1>10

SPEC: az437ibm\_b 17-Dec-13 REG : 00:16.4 #9  
 Samp: dG-karboran-N2 Start : 15:37:53 10  
 Comm: LSI, Cs+ 13 keV, gly  
 Mode: FAB -VE -LMR BSCAN (EXP) UP LR NRM Study : MS CBMIM PAN Lodz  
 Oper: ub Client: IBM A.Olejniczak Inlet :  
 Base: 183.0 Inten : 106048 Masses: 100 > 1000  
 Norm: 183.0 RIC : 2216830 #peaks: 778  
 Peak: 1000.00 mmu  
 Data: +1>10

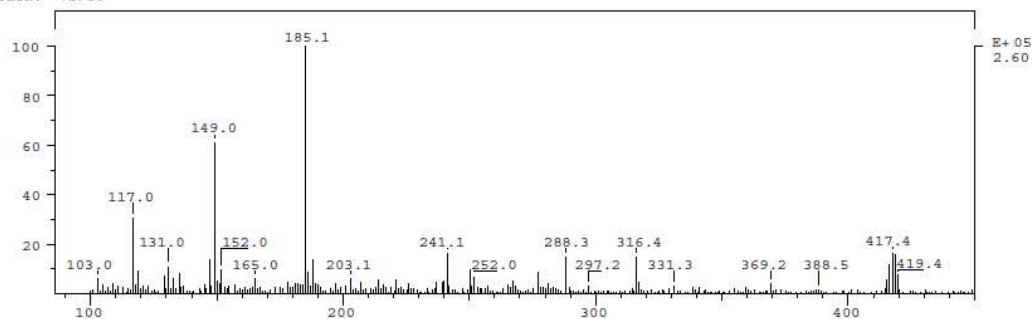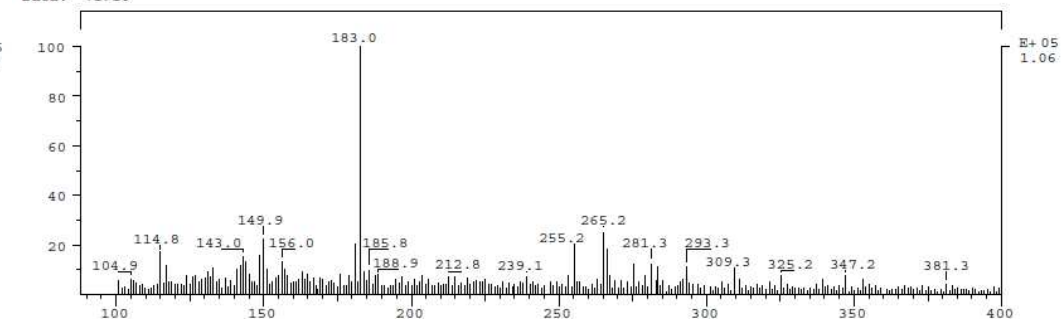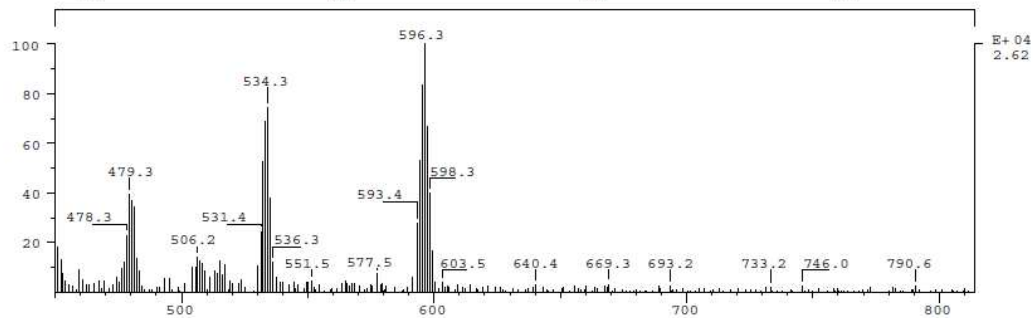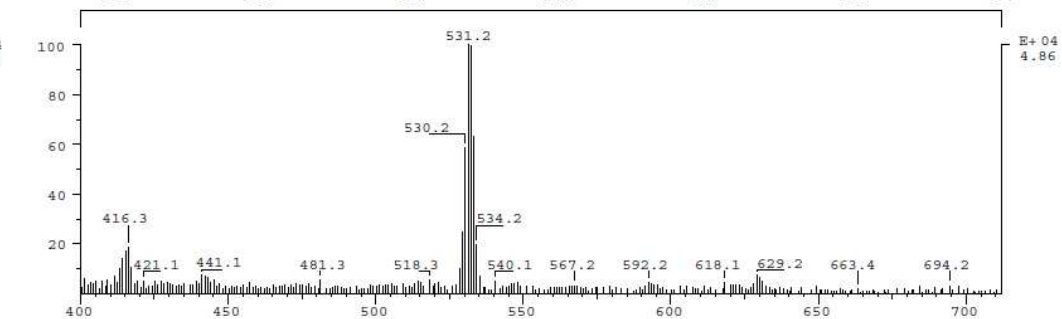

Figure S93. MS-FAB spectra of compound 27.

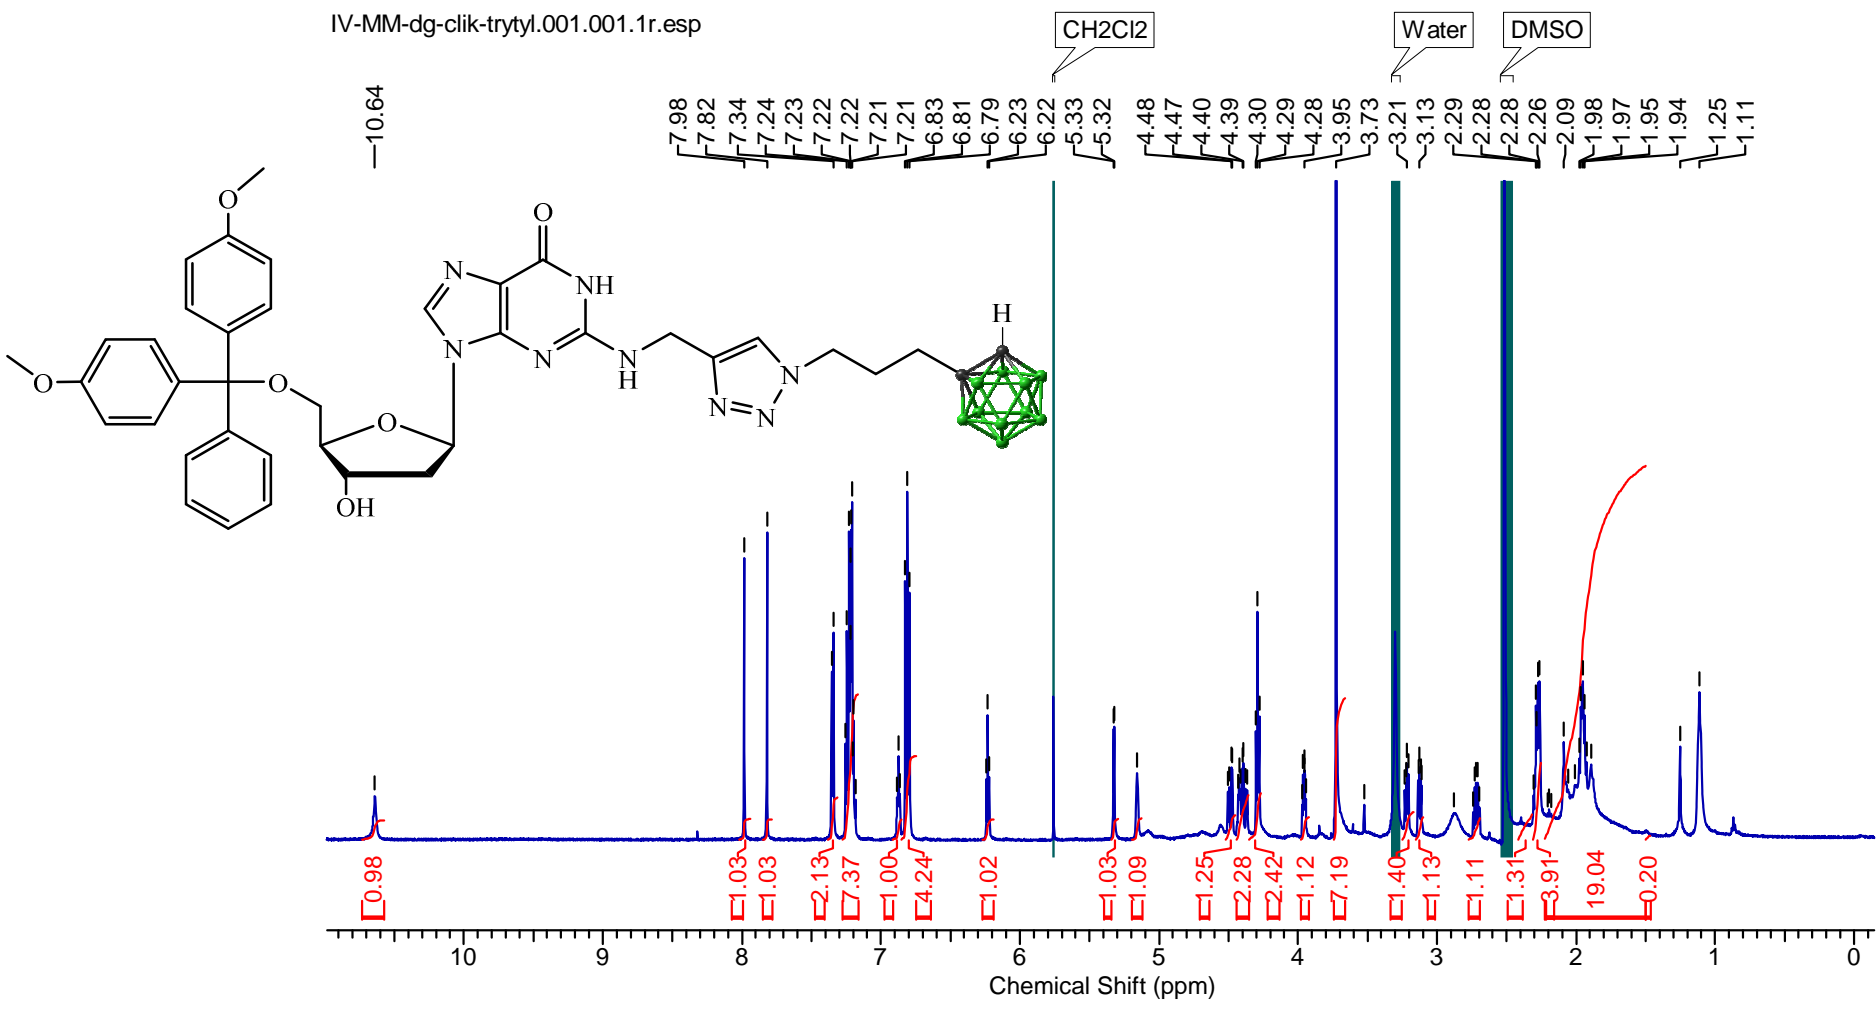

Figure S94. <sup>1</sup>H NMR spectrum of compound 28.

IV-MM-dg-clik-trytyl.012.001.1r.esp

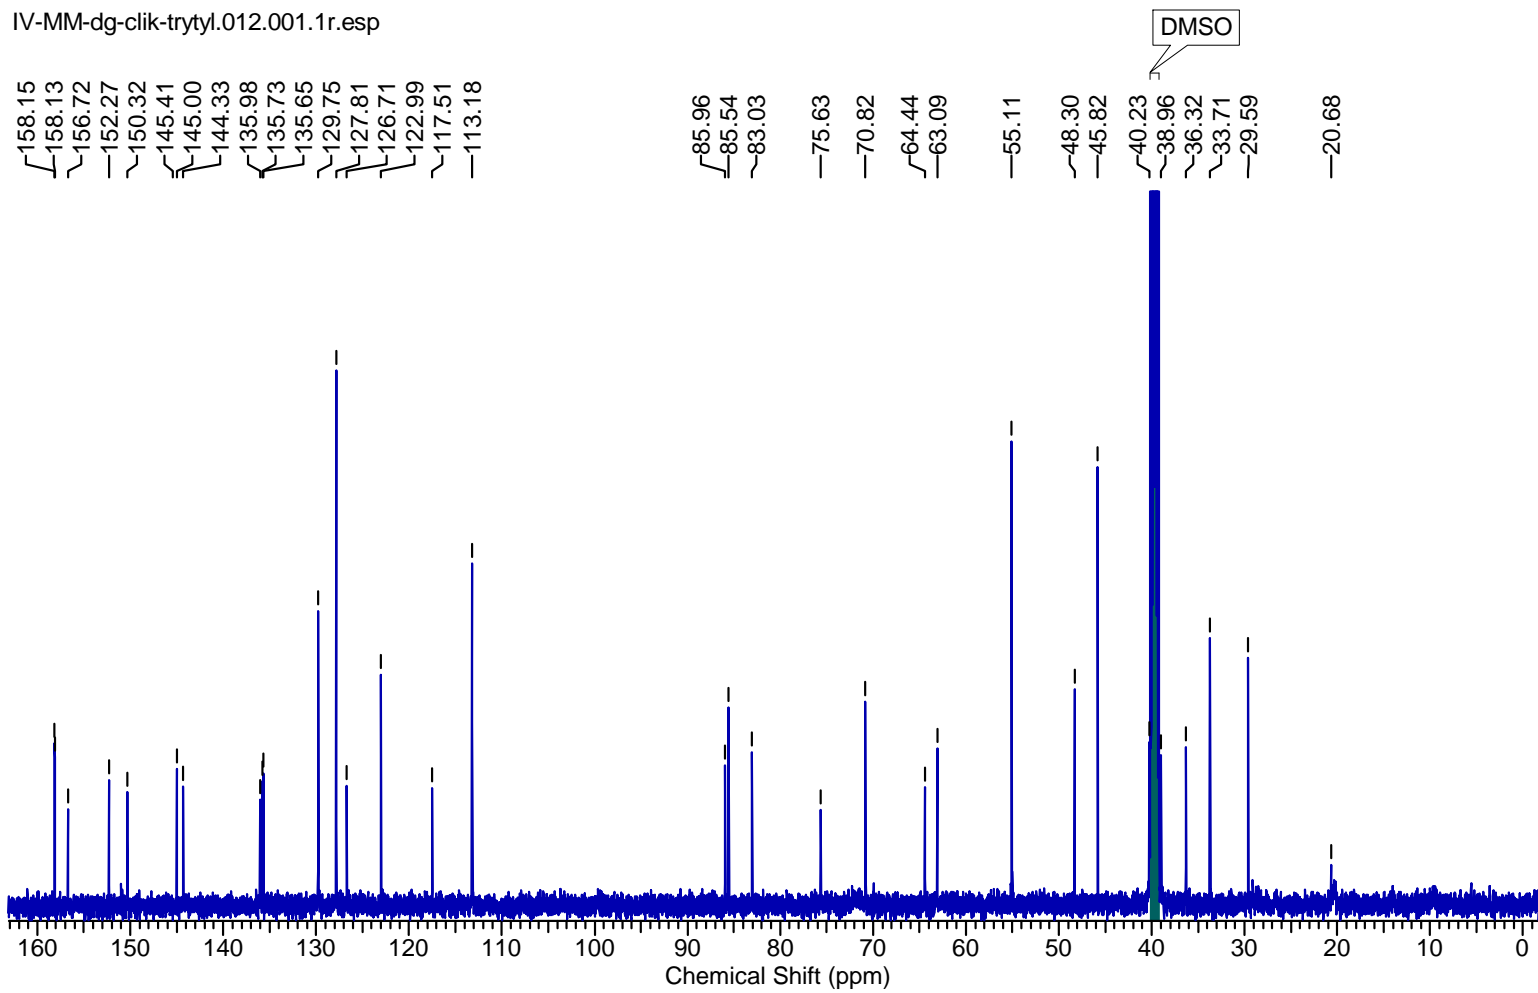

Figure S95.  $^{13}\text{C}$  NMR spectrum of compound 28.

IV-MM-dg-clik-trytyl.013.001.1r.esp

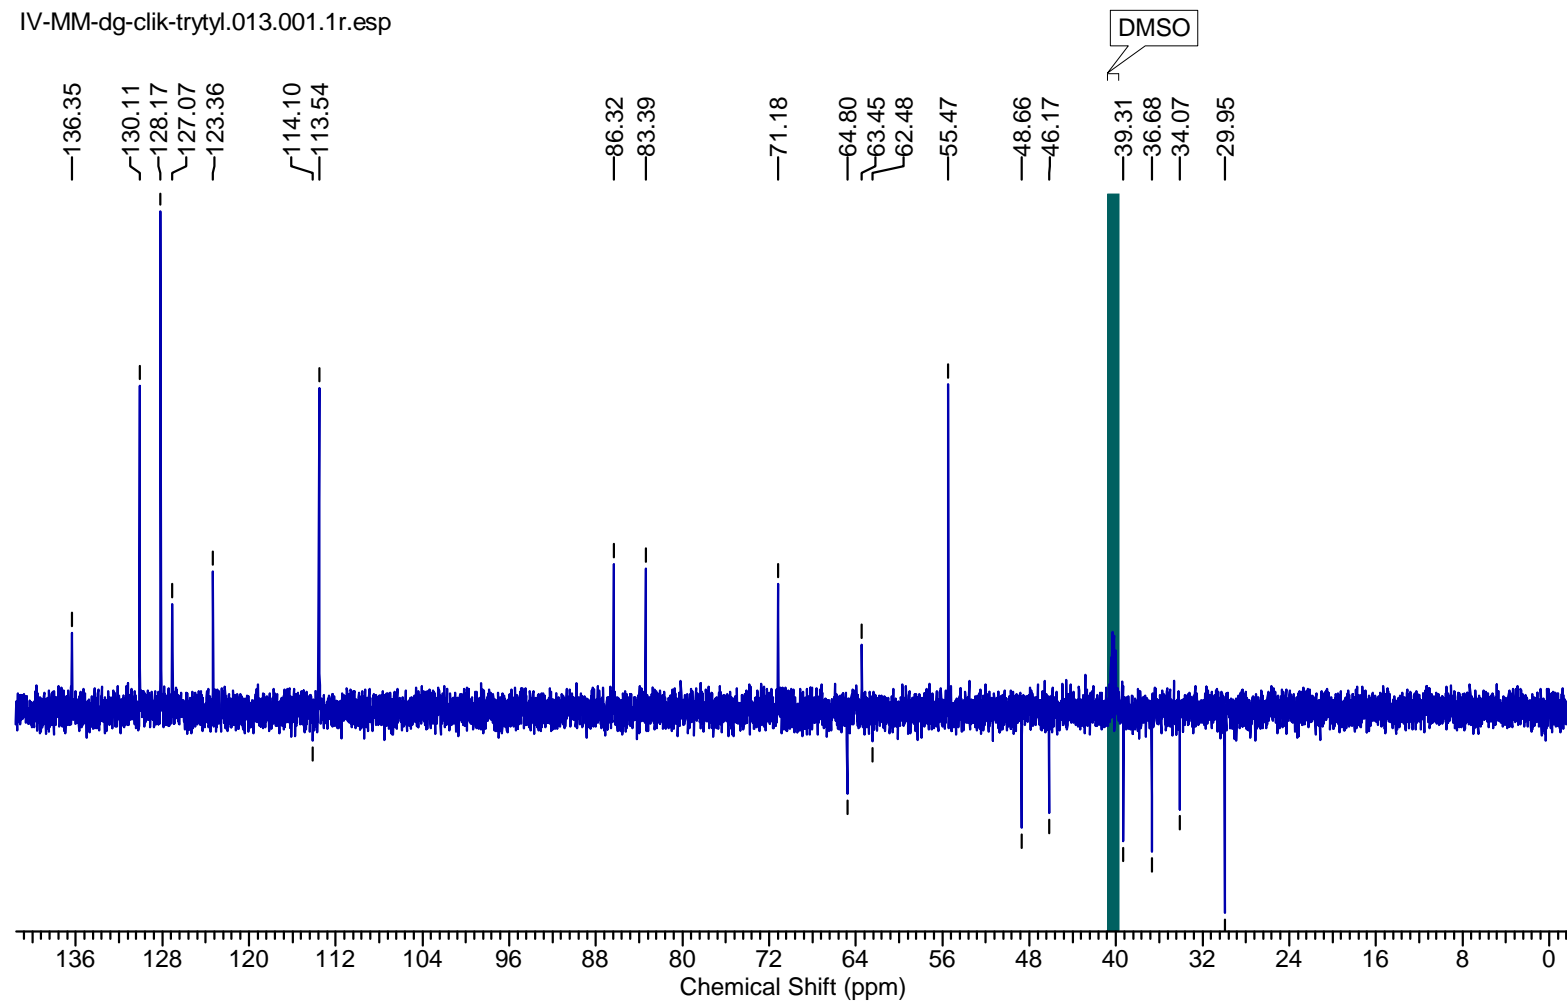

*Figure S96.* DEPT-135 spectrum of compound **28**.

IV-MM-amido-dg-clik-trytyl.007.001.1r.esp

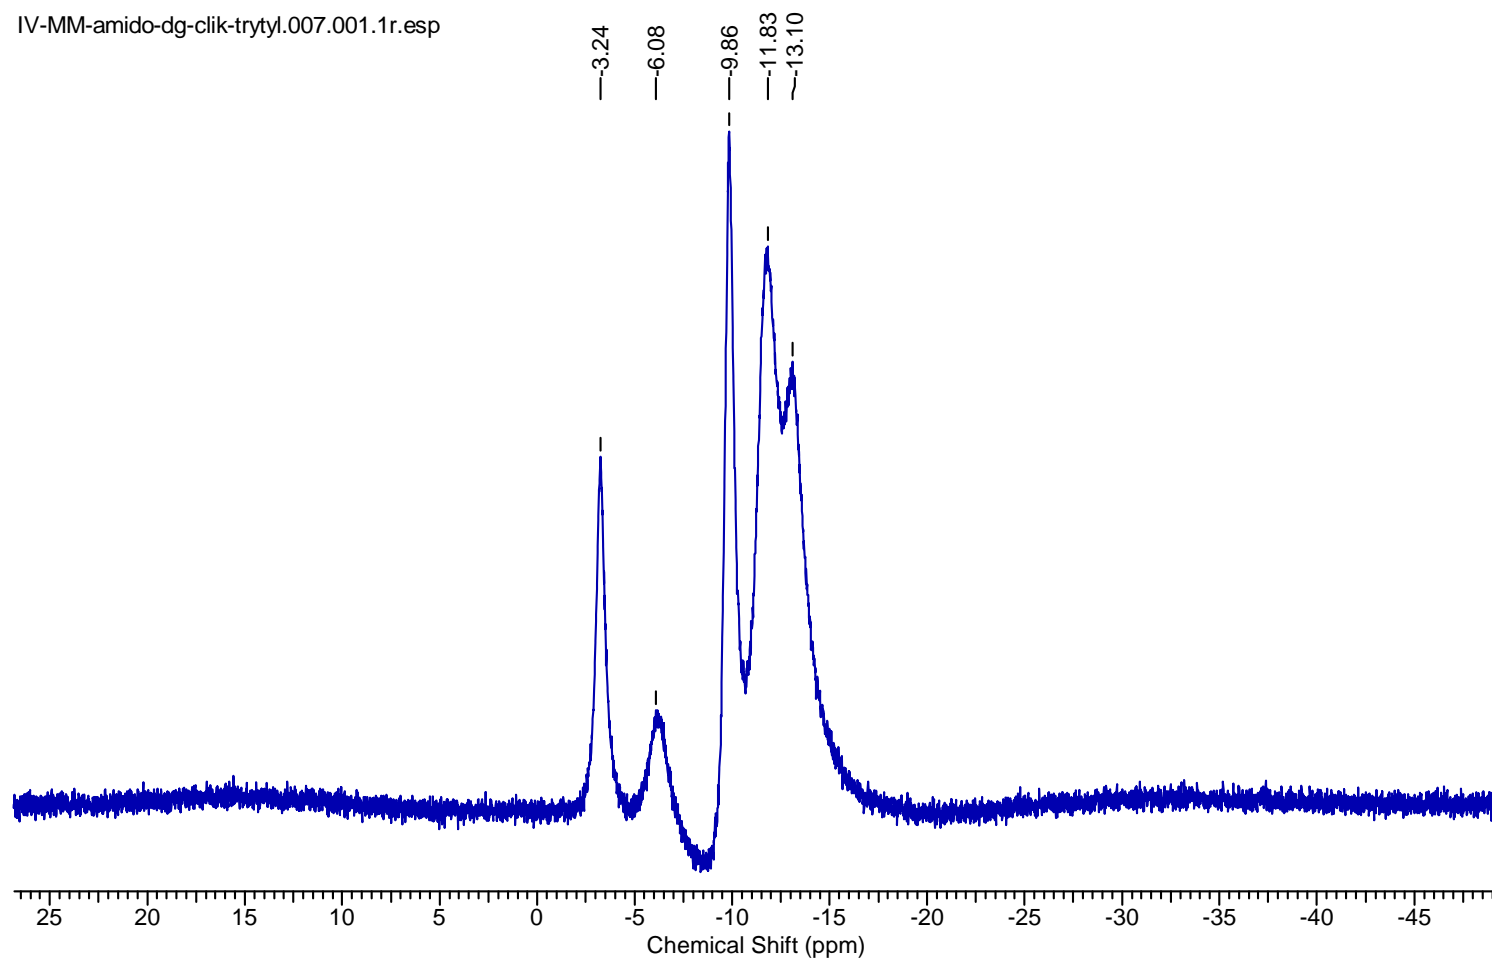

*Figure S97.*  $^{11}\text{B}\{^1\text{H BB}\}$  NMR spectrum of compound **28**.

IV-MM-amido-dg-clik-trytyl.008.001.1r.esp

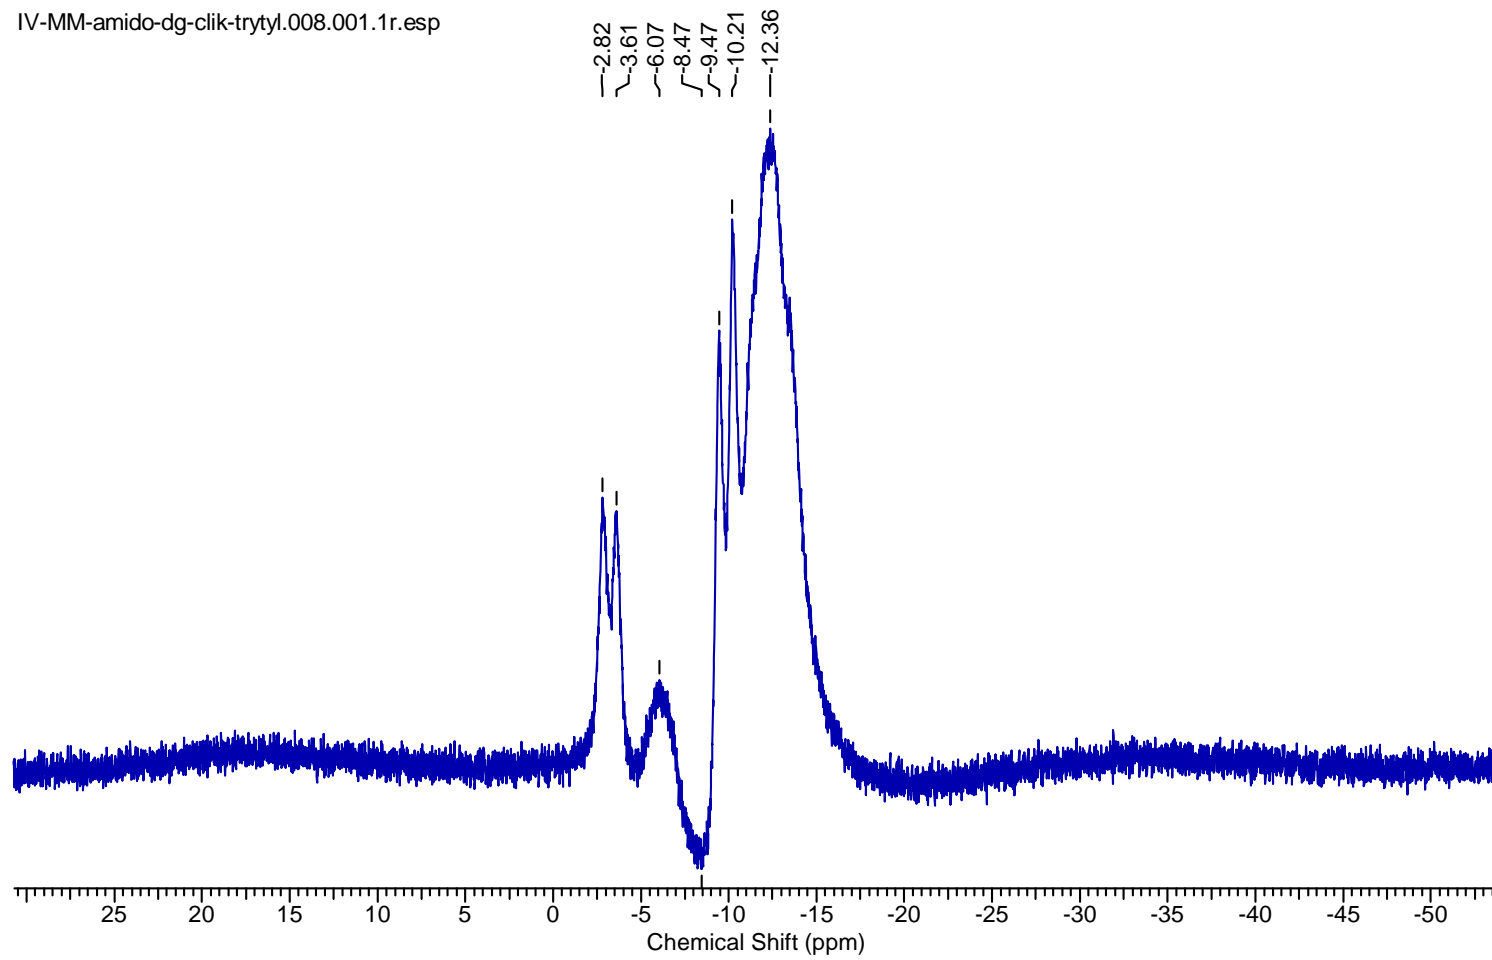

*Figure S98.*  $^{11}\text{B}$  NMR spectrum of compound **28**.

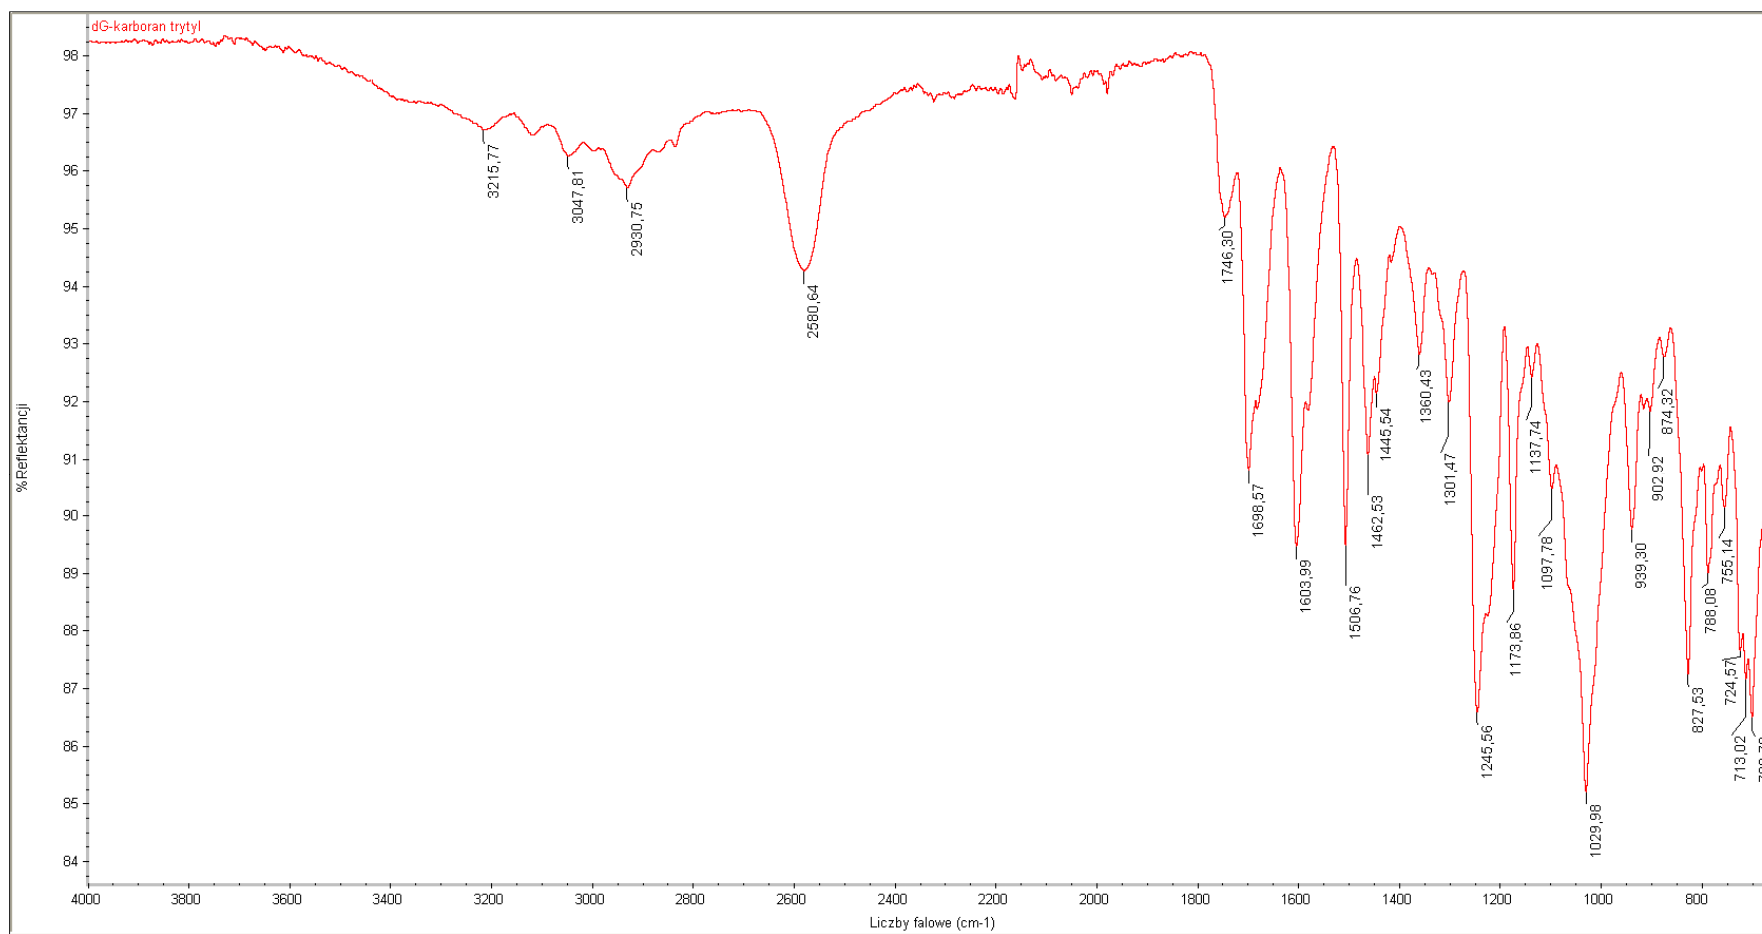

*Figure S99.* IR spectrum of compound **28**.

SPEC: az438ibm 17-Dec-13 REG : 00:16.4 #9  
 Samp: dG-karboran-N2-trytyl Start : 14:50:31 10  
 Comm: LSI, Cs+ 13 keV, gly  
 Mode: FAB +VE +LMR BSCAN (EXP) UP LR NRM Study : MS CBM1M PAN Lodz  
 Oper: ub Client: IBM A.Olejniczak Inlet :  
 Base: 303.2 Inten : 25521140 Masses: 100 > 1000  
 Norm: 303.2 RIC : 52998745 #peaks: 793  
 Peak: 1000.00 mmu  
 Data: +1>10

SPEC: az438ibm\_c 17-Dec-13 REG : 00:16.4 #9  
 Samp: dG-karboran-N2-trytyl Start : 16:20:29 10  
 Comm: LSI, Cs+ 13 keV, gly  
 Mode: FAB -VE -LMR BSCAN (EXP) UP LR NRM Study : MS CBM1M PAN Lodz  
 Oper: ub Client: IBM A.Olejniczak Inlet :  
 Base: 182.9 Inten : 2006159 Masses: 100 > 1000  
 Norm: 182.9 RIC : 12754517 #peaks: 854  
 Peak: 1000.00 mmu  
 Data: +1>10

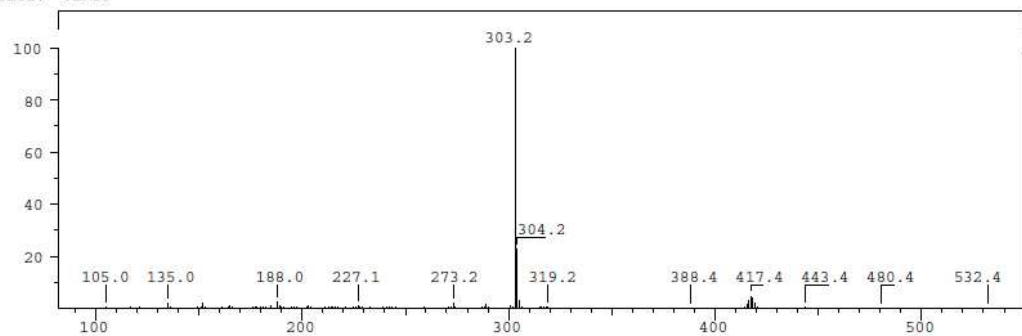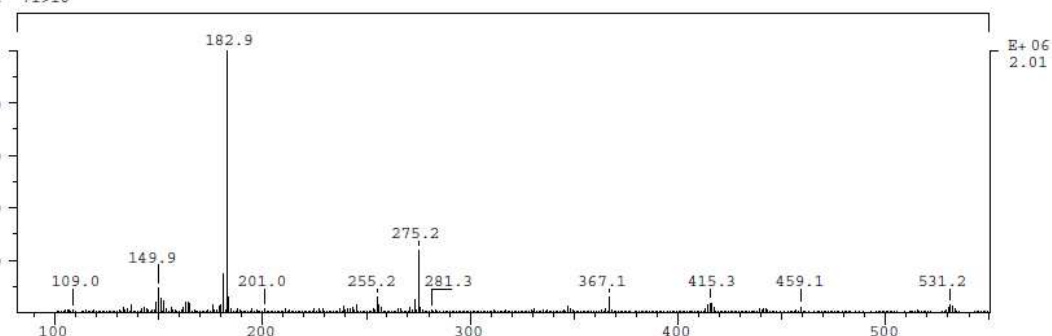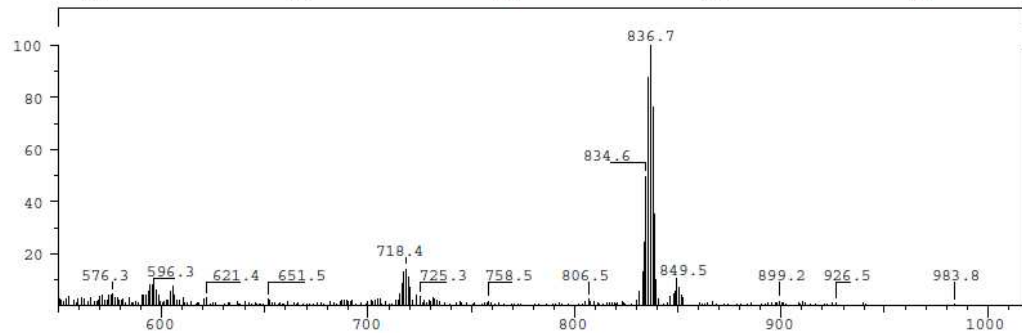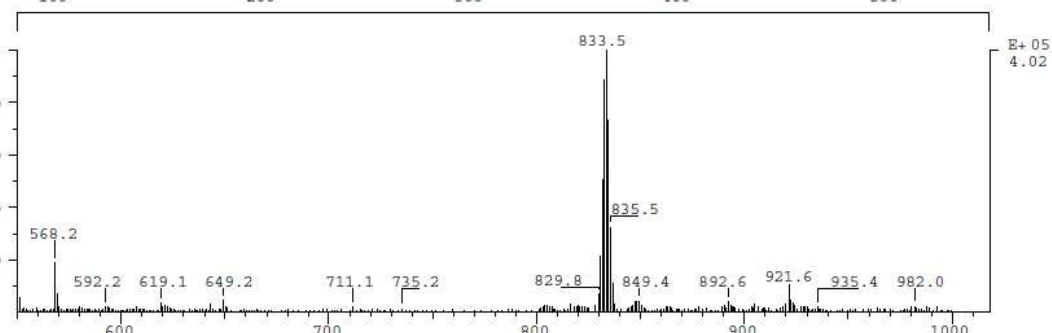

Figure S100. MS-FAB spectra of compound 28.



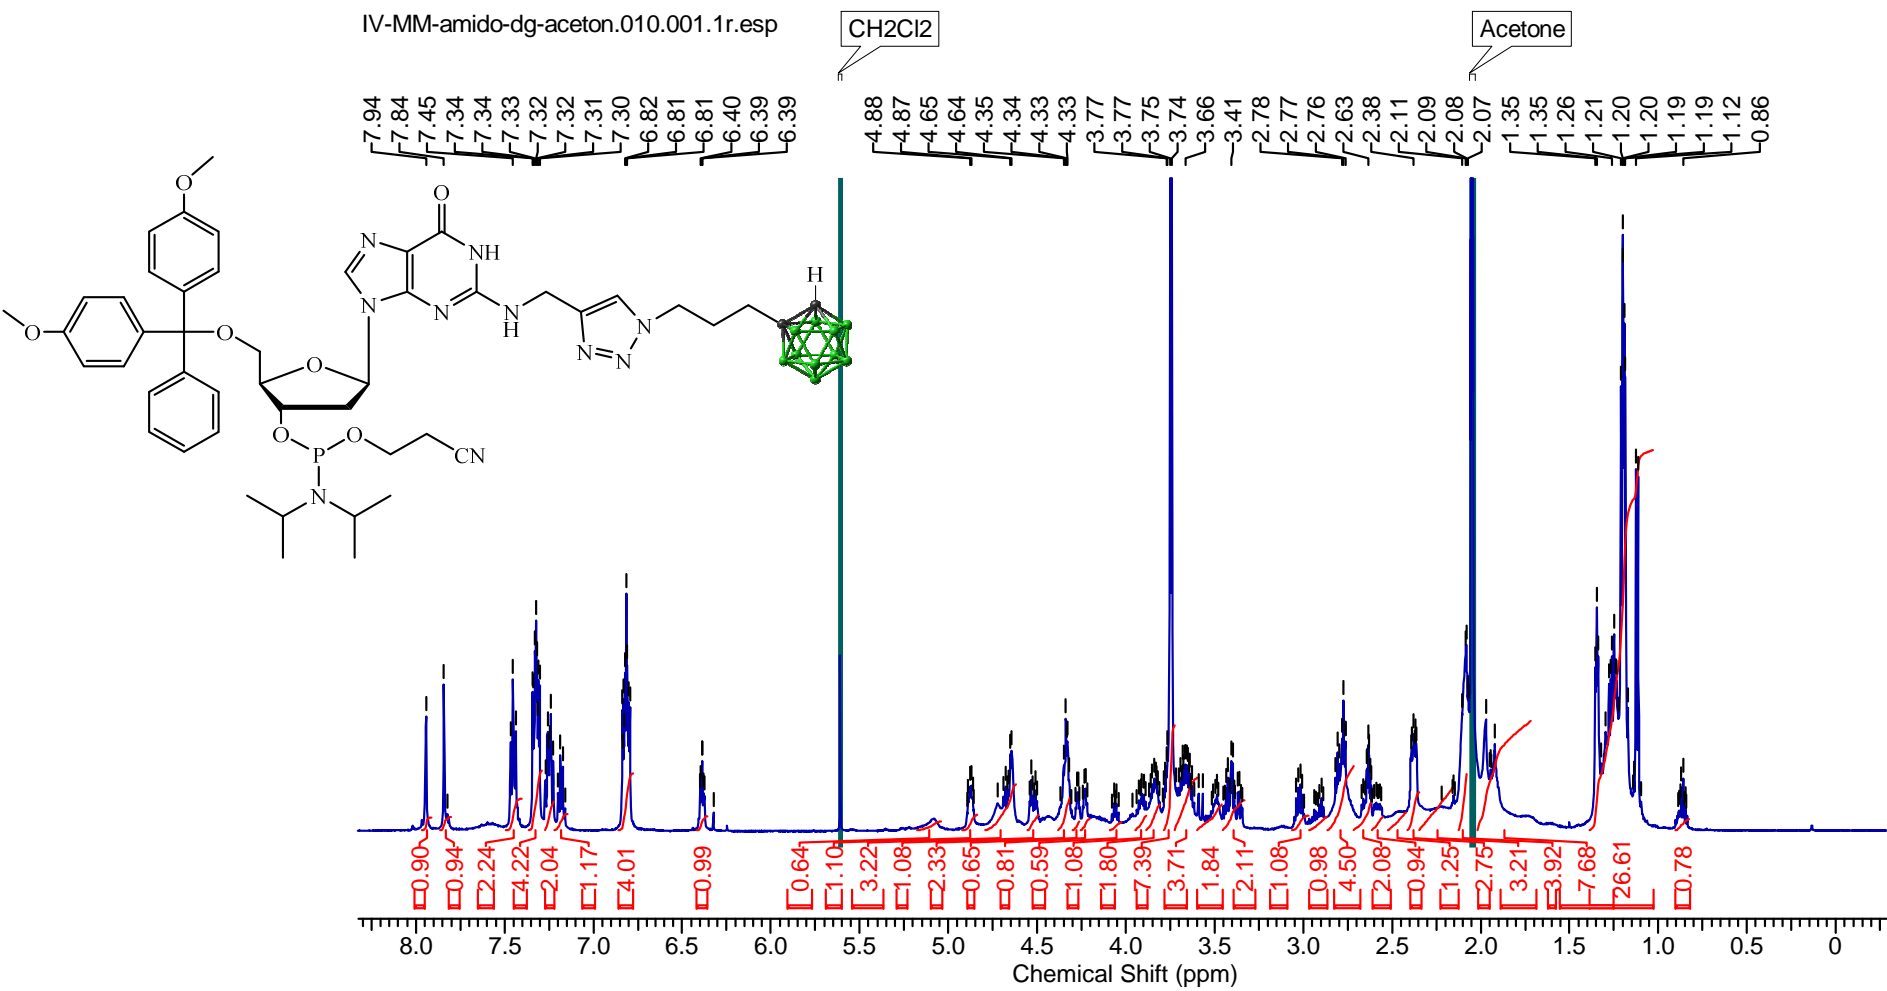

Figure S101. <sup>1</sup>H NMR spectrum of compound 32.

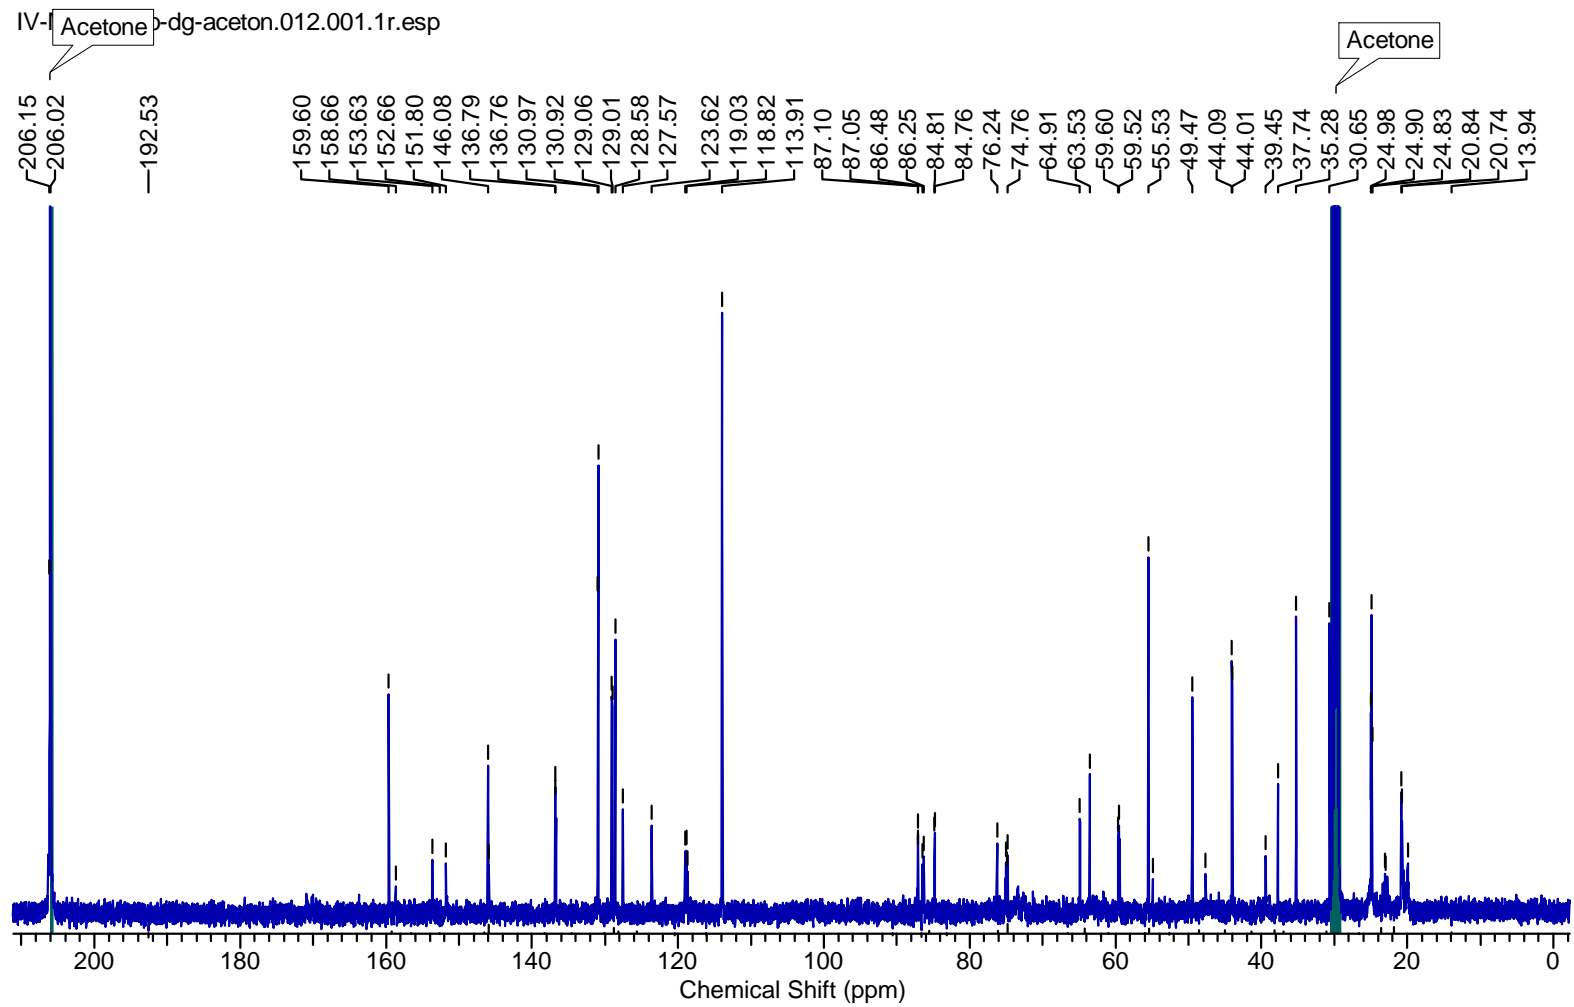

Figure S102.  $^{13}\text{C}$  NMR spectrum of compound 32.

IV-MM-amido-dg-aceton.013.001.1r.esp

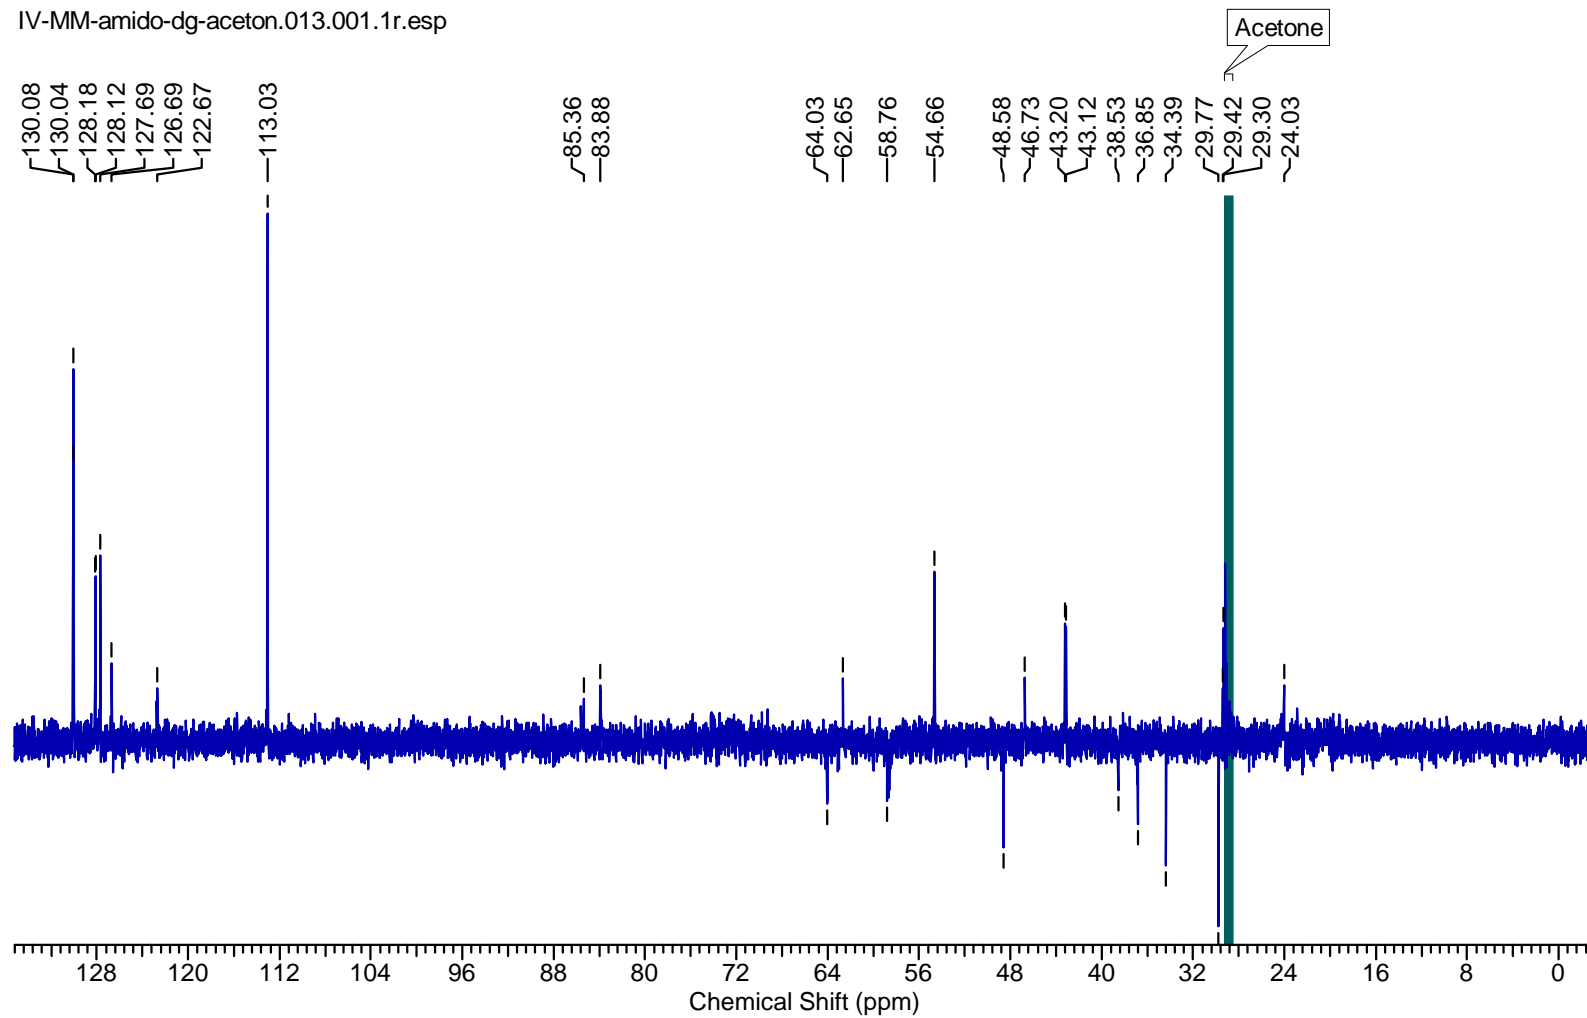

*Figure S103.* DEPT-135 spectrum of compound **32**.

IV-MM-amido-dg-aceton.007.001.1r.esp

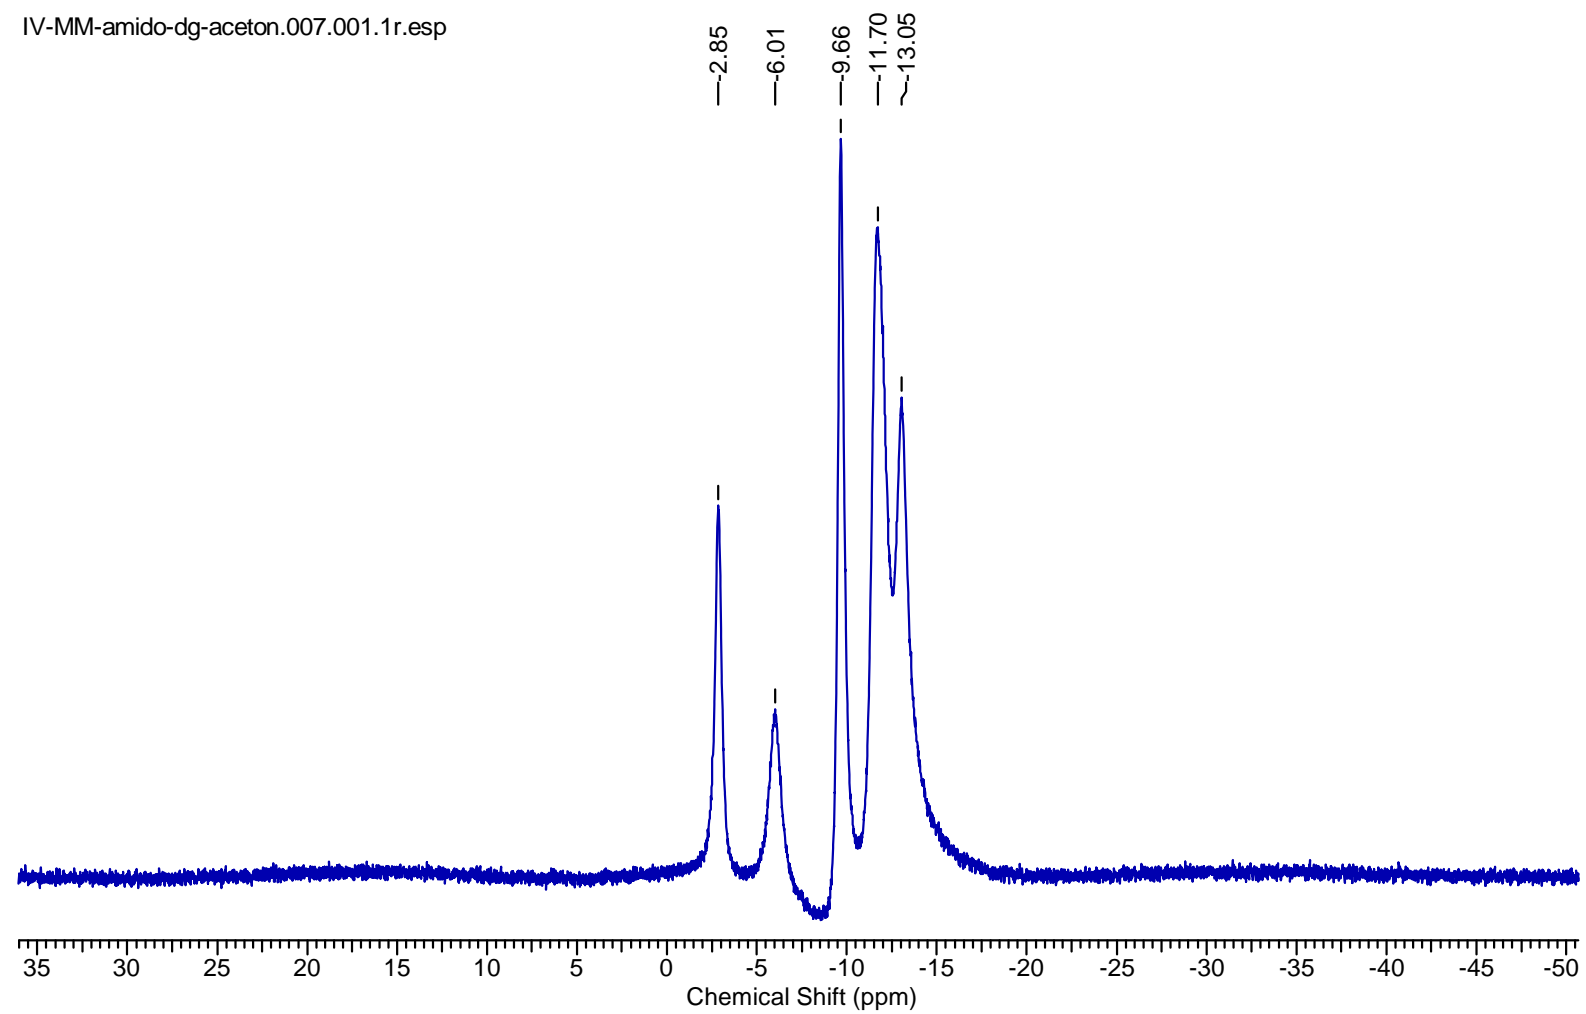

**Figure S104.**  $^{11}\text{B}\{^1\text{H BB}\}$  NMR spectrum of compound **32**.

IV-MM-amido-dg-aceton.008.001.1r.esp

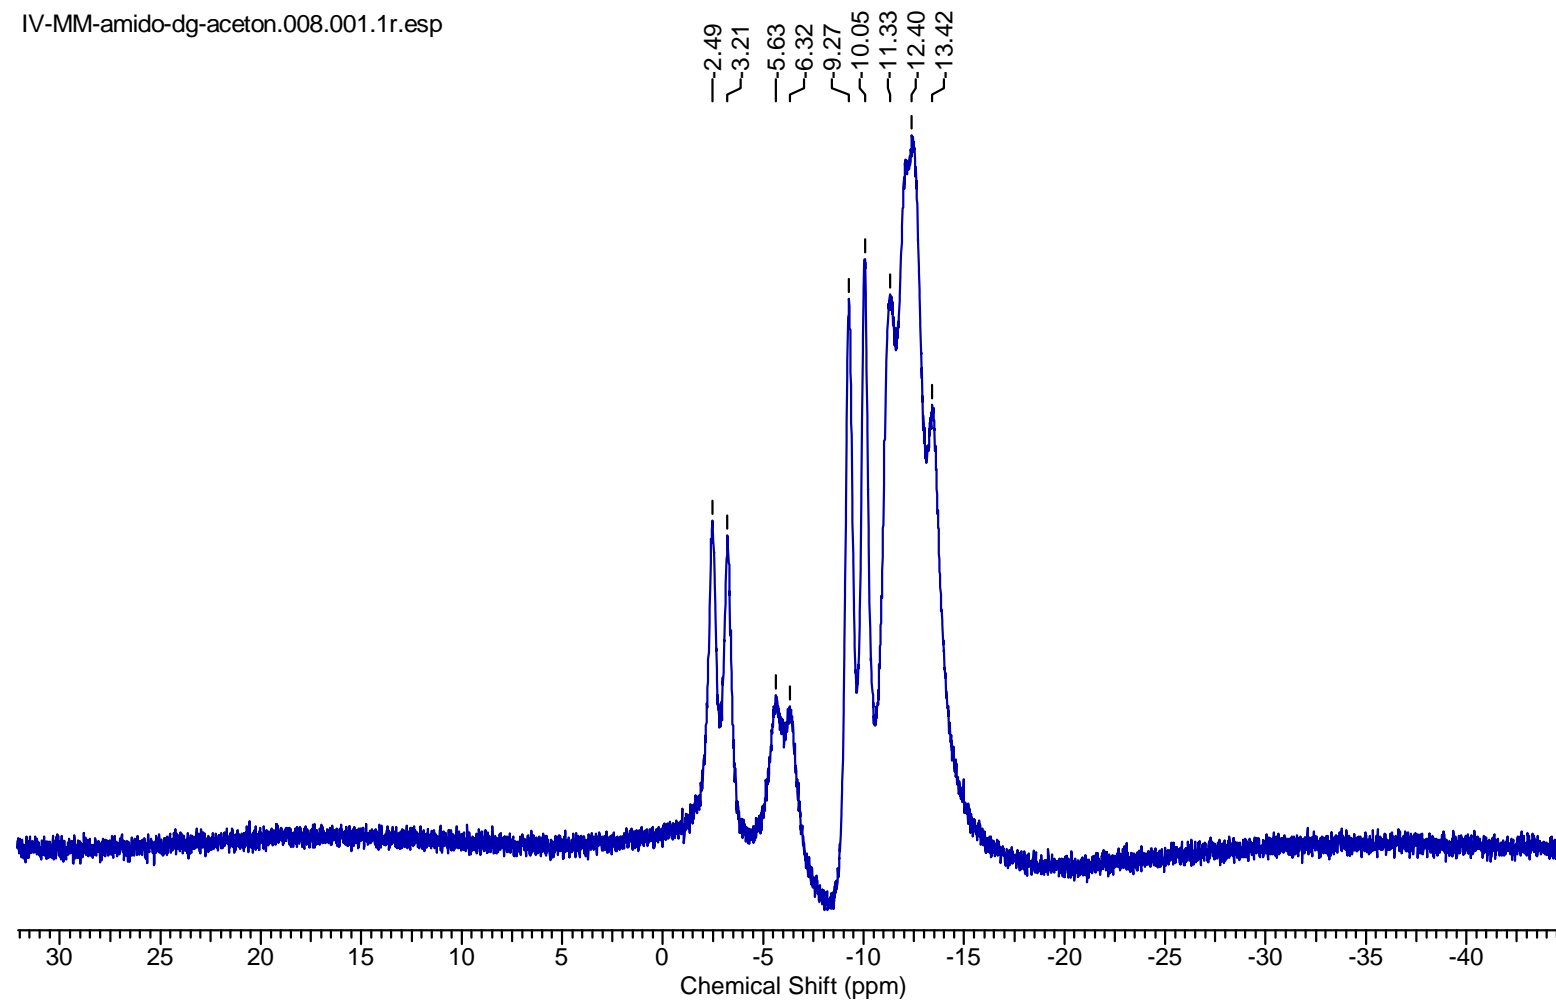

*Figure S105.*  $^{11}\text{B}$  NMR spectrum of compound **32**.

II-MM-amido-dg-aceton.001.001.1r.esp

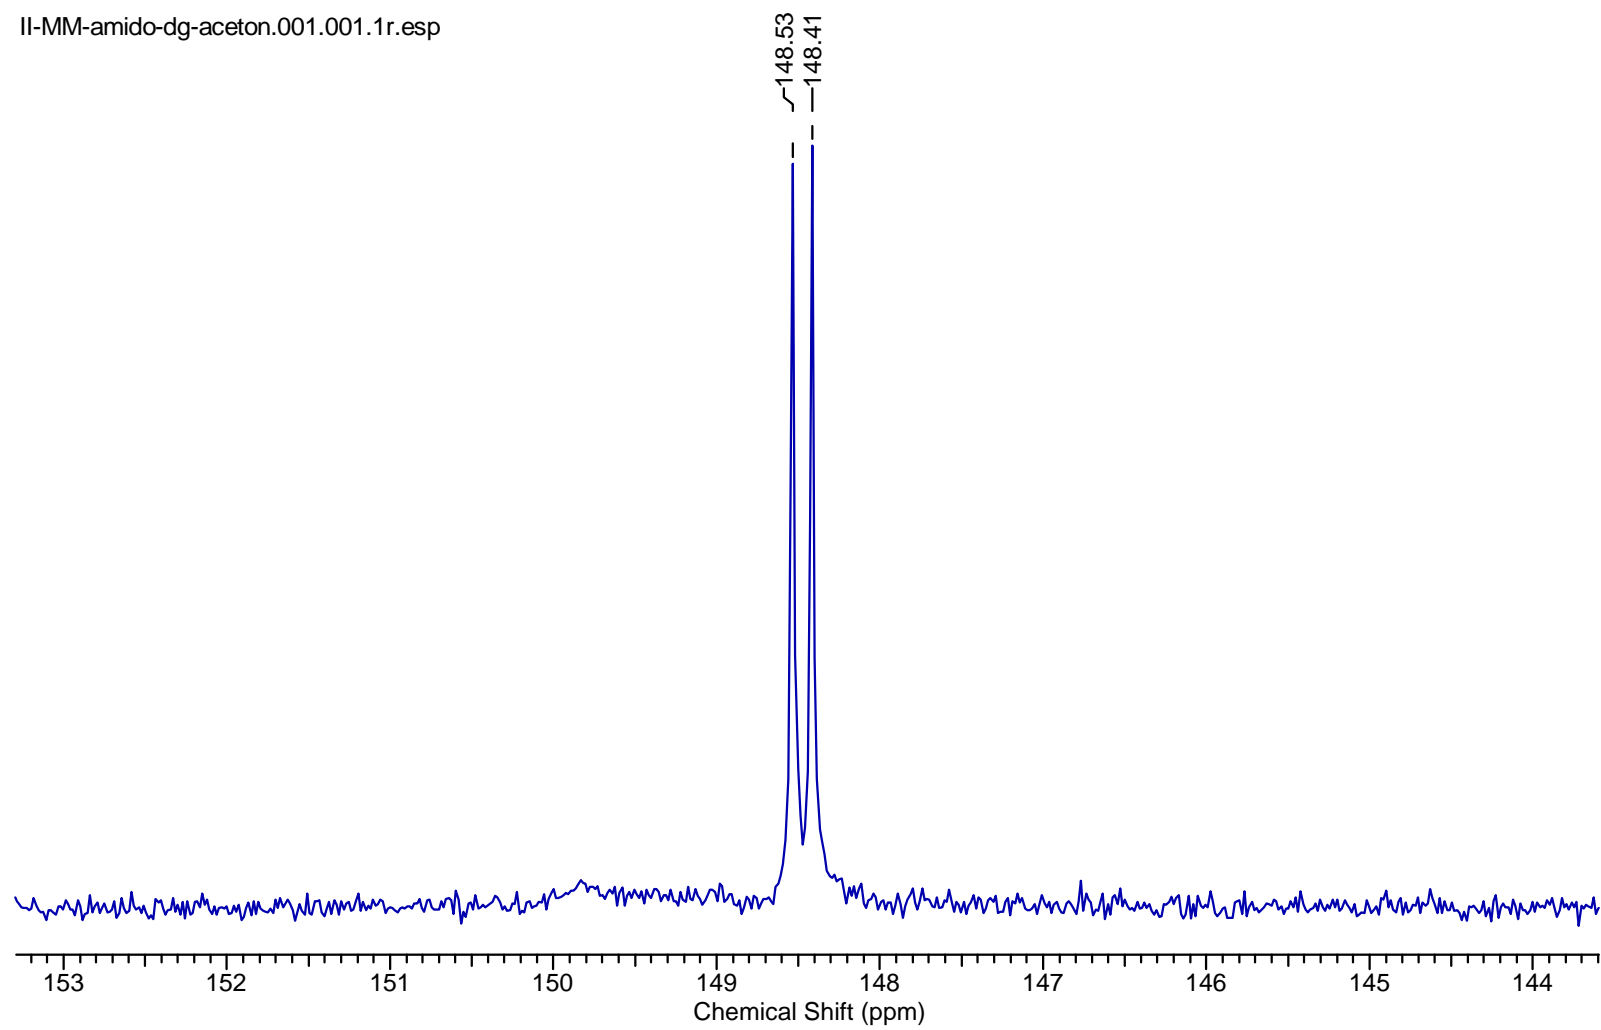

**Figure S106.**  $^{31}\text{P}$  NMR spectrum of compound **32**.

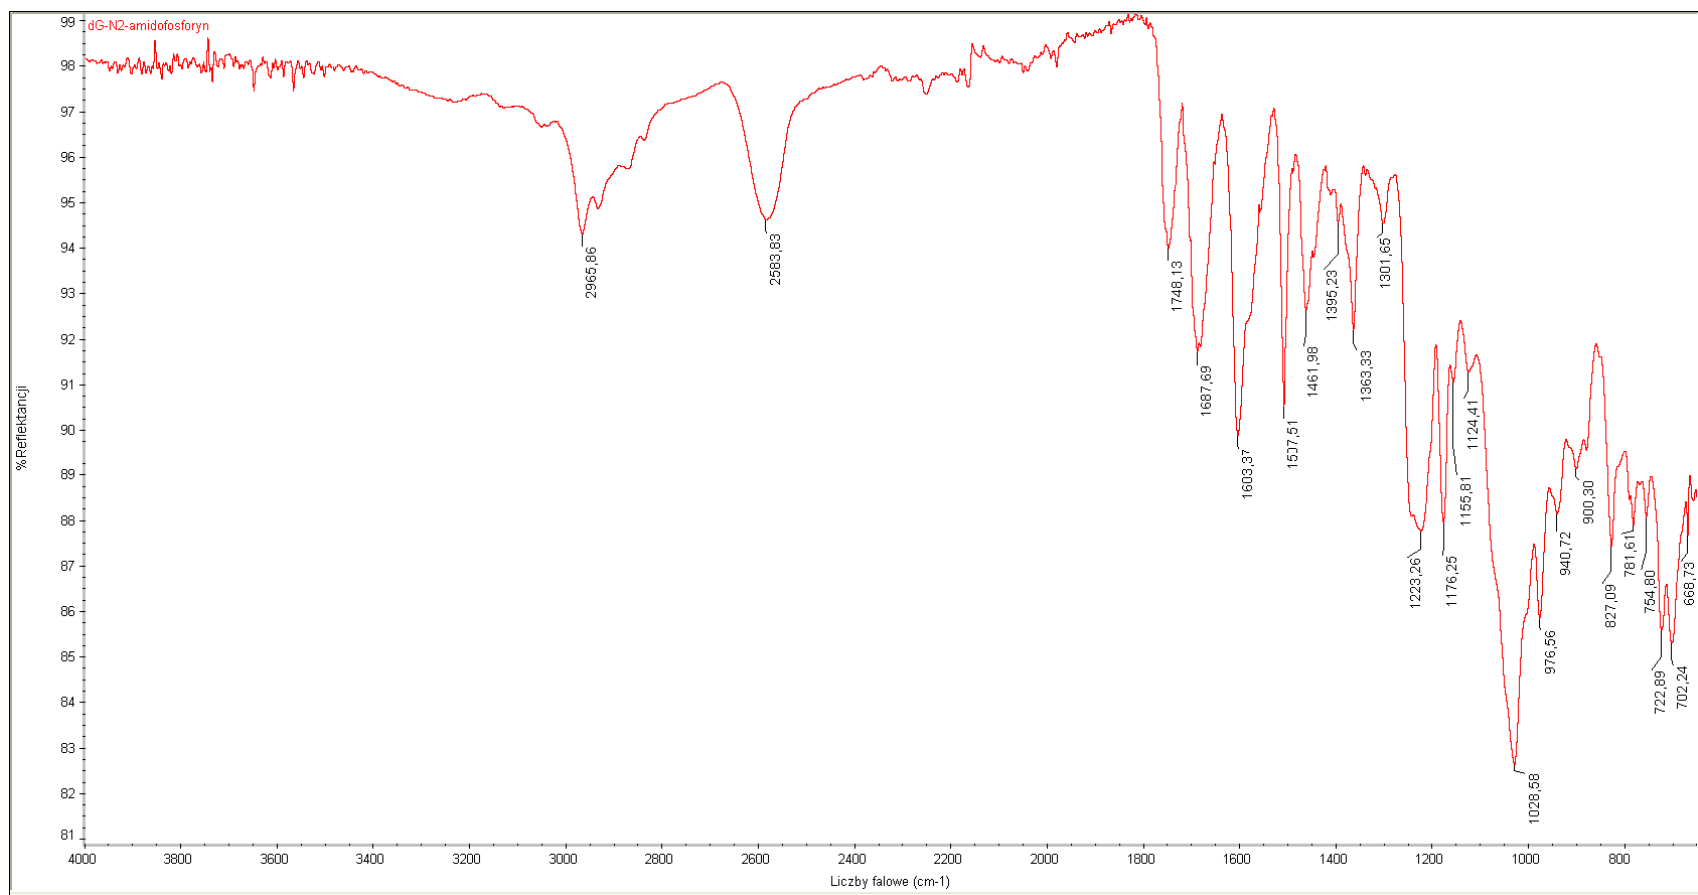

Figure S107. IR spectrum of compound 32.

SPEC: az4671bm\_c 23-Dec-13 REG : 00:16.9 #9  
 Samp: dg-amido LSI, Cs+ 13 keV, nba Start : 10:59:43 10  
 Comm: LSI, Cs+ 13 keV, nba  
 Mode: FAB +VE +LMR BSCAN (EXP) UP LR NRM Study : MS CBMIM PAN Lodz  
 Oper: ew Client: IBM A.Olejniczak Inlet :  
 Base: 303.2 Inten : 2484027 Masses: 100 > 1117  
 Norm: 303.2 RIC : 13835387 #peaks: 917  
 Peak: 1000.00 mmu  
 Data: +1>10

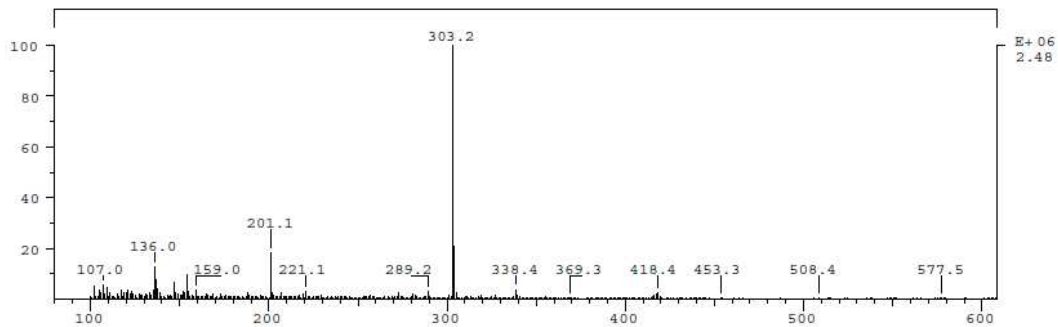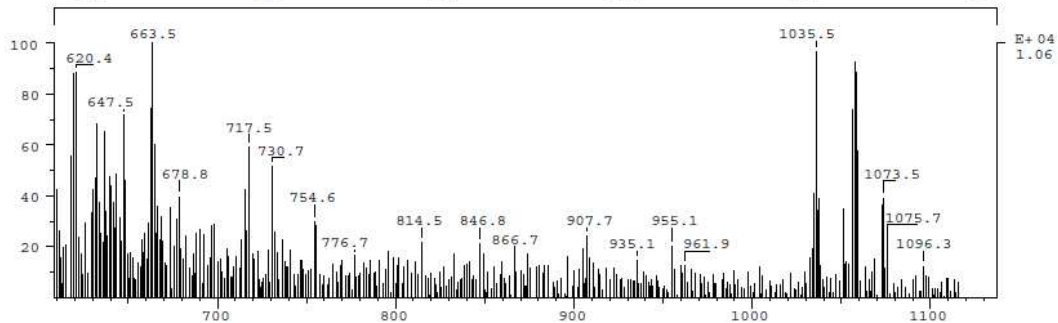

SPEC: az4671bm\_b 23-Dec-13 REG : 00:16.9 #9  
 Samp: dg-amido LSI, Cs+ 13 keV, nba Start : 10:56:11 10  
 Comm: LSI, Cs+ 13 keV, nba  
 Mode: FAB -VE -LMR BSCAN (EXP) UP LR NRM Study : MS CBMIM PAN Lodz  
 Oper: ew Client: IBM A.Olejniczak Inlet :  
 Base: 153.0 Inten : 2639984 Masses: 100 > 1127  
 Norm: 153.0 RIC : 17142050 #peaks: 1014  
 Peak: 1000.00 mmu  
 Data: +1>10

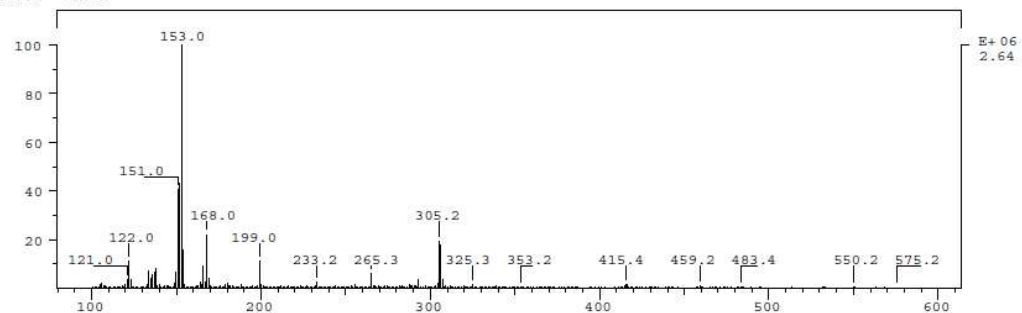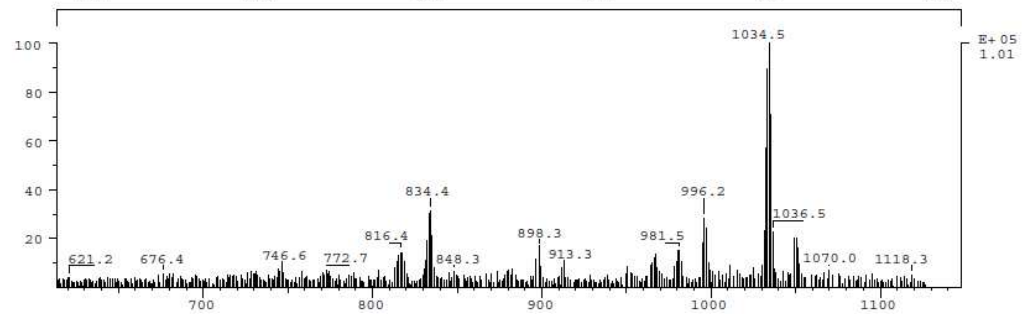

Figure S108. MS-FAB spectra of compound 32.



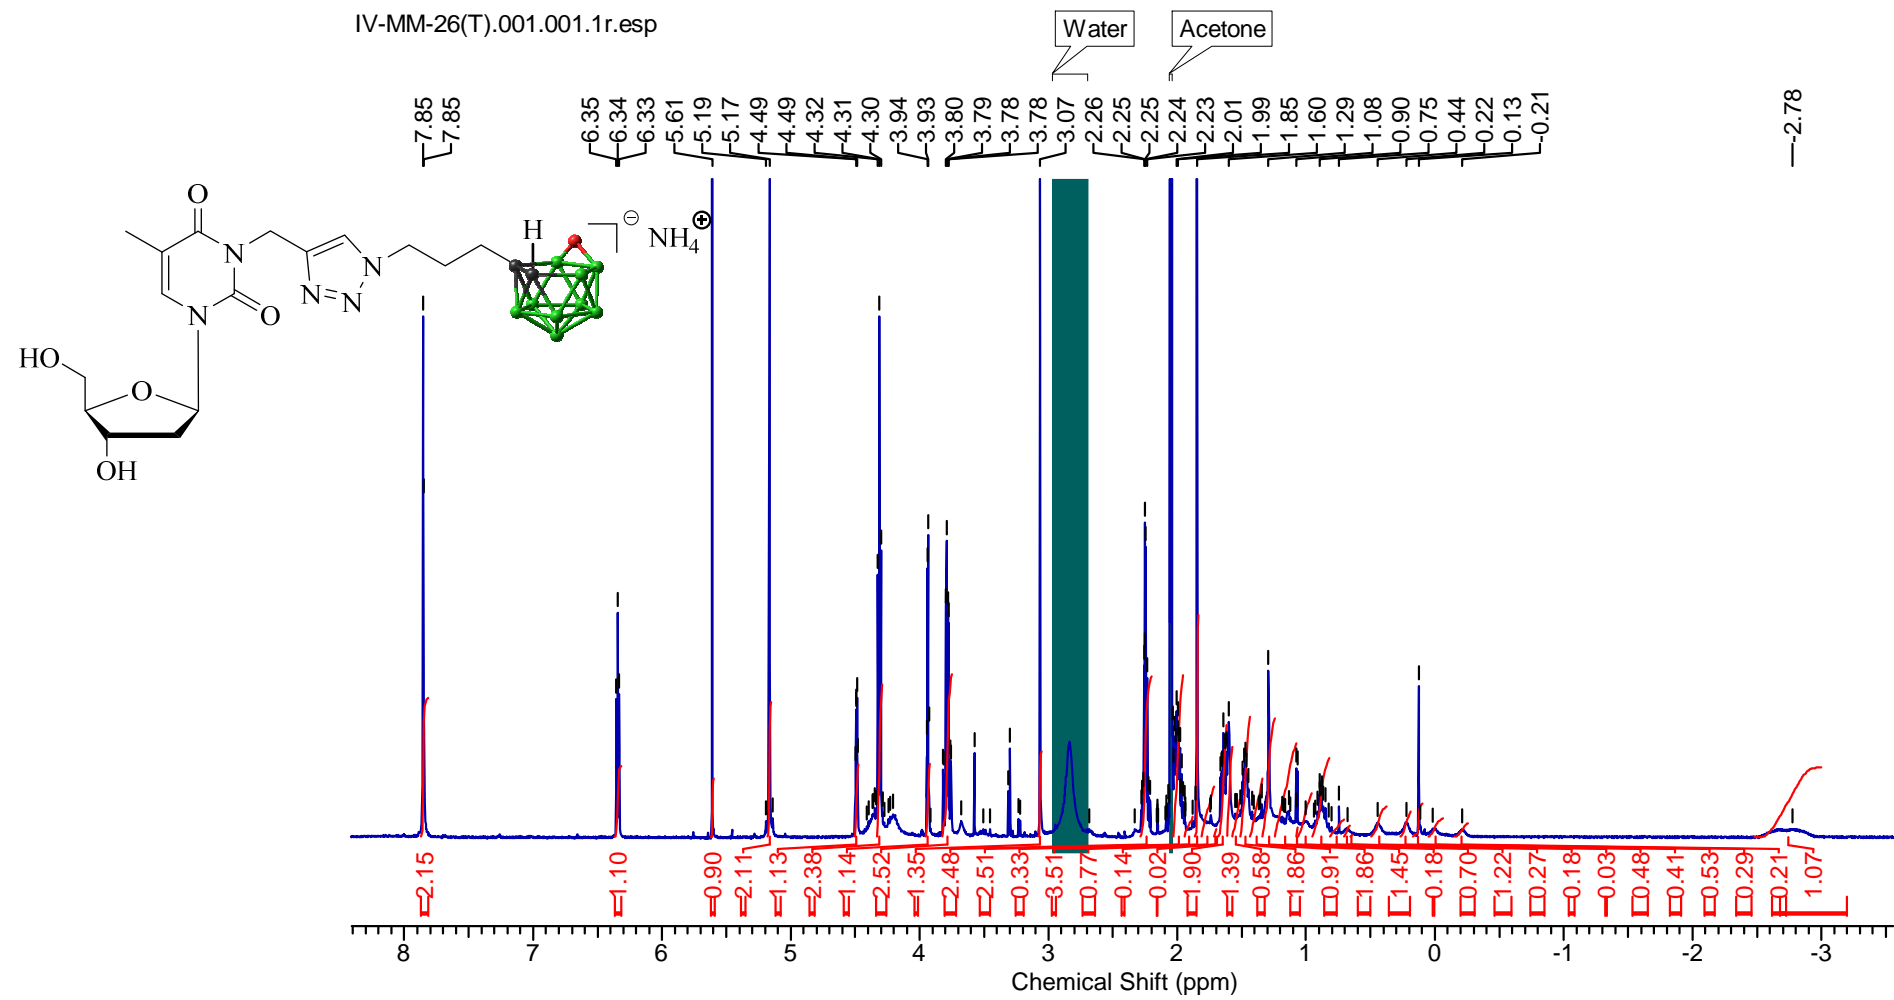

Figure S109.  $^1\text{H}$  NMR spectrum of compound 33.

SPEC: ay3591bm\_a 11-Jan-13 REG : 00:16.9 #9  
Samp: T-mido Start : 15:43:52 10  
Comm: LSI, Cs+ 13 keV, gly  
Mode: FAB -VE -LMR BSCAN (EXP) UP LR NRM Study : MS CBMIM PAN Lodz  
Oper: ed Client: IBM PAN A.Olejnicza Inlet :  
Base: 283.4 Inten : 166018 Masses: 100 > 1117  
Norm: 283.4 RIC : 3065074 #peaks: 815  
Peak: 1000.00 mmu  
Data: +1>10

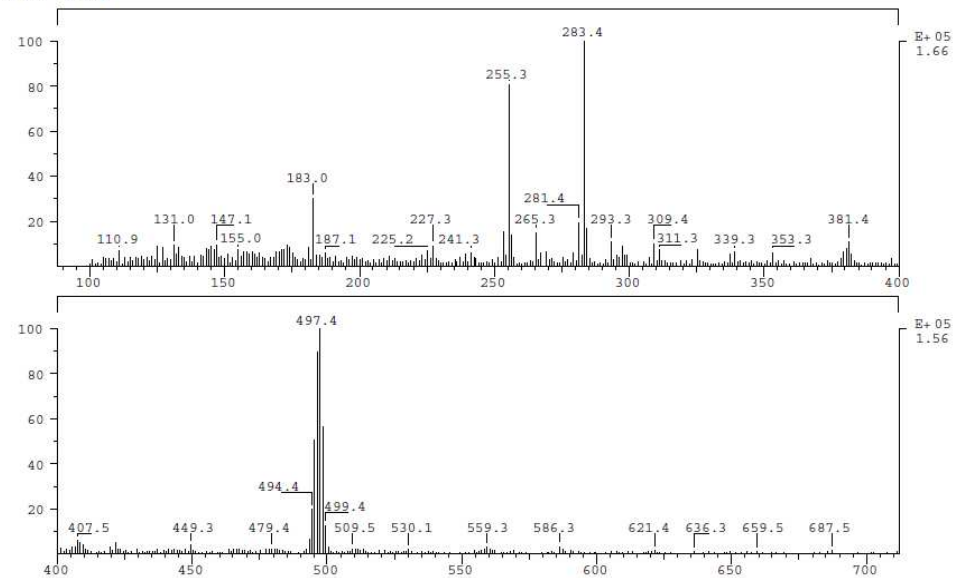

**Figure S110.** MS-FAB spectrum of compound **33**.

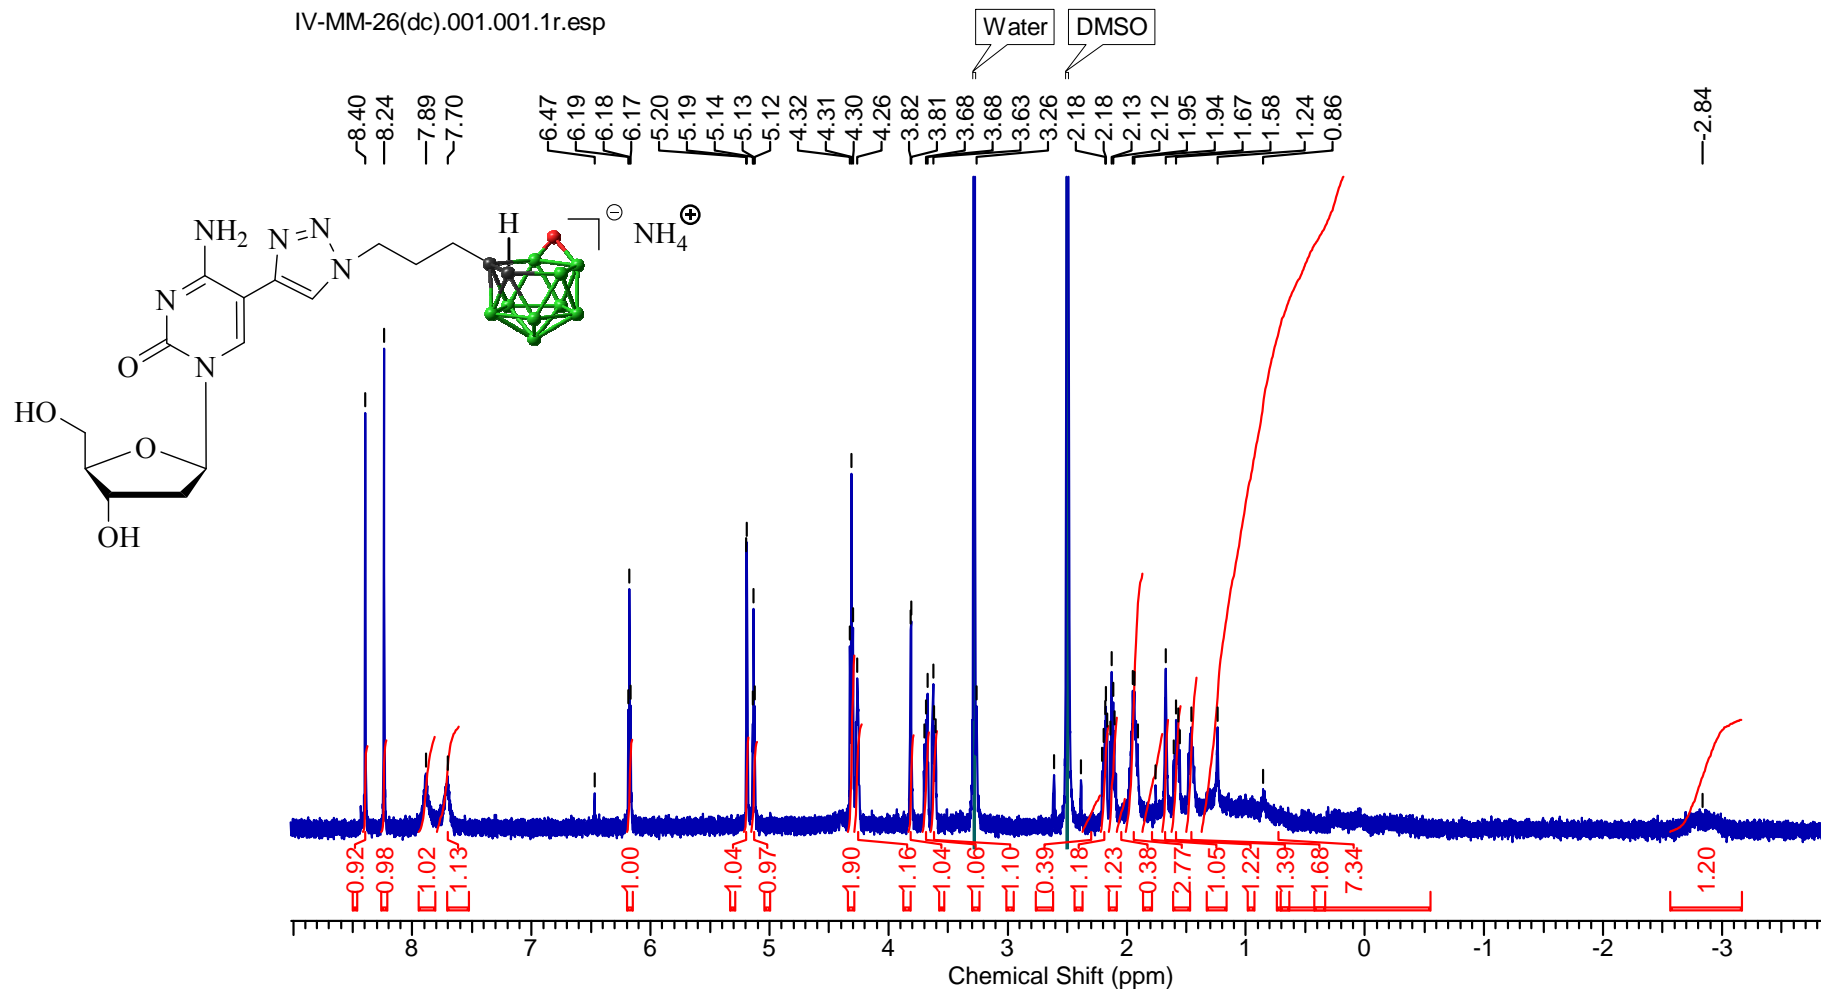

Figure S111.  $^1\text{H}$  NMR spectrum of compound 34.

SPEC: az4661bm 23-Dec-13 REG : 00:16.9 #9  
Samp: IV-MM-26 (DC) Start : 10:07:44 10  
Comm: L51, Cs+ 13 keV, gly  
Mode: FAB -VE -LMR ESCAN (EXP) UP LR NRM Study : MS CBM1M PAN Lodz  
Oper: ew Client: IHM A.Olejniczak Inlet :  
Base: 183.1 Inten : 3588431 Masses: 100 > 1127  
Norm: 183.1 RIC : 22461523 #peaks: 999  
Peak: 1000.00 mmu  
Data: +1>10

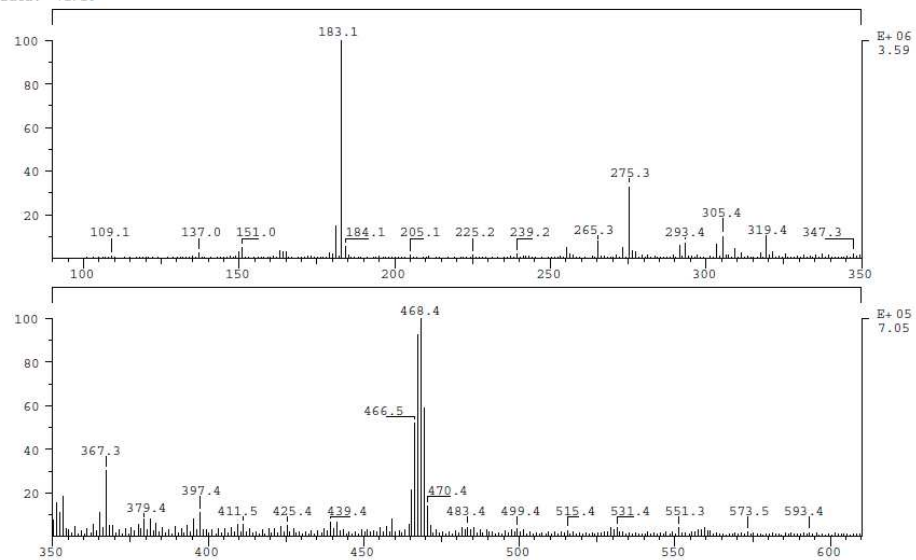

**Figure S112.** MS-FAB spectrum of compound **34**.

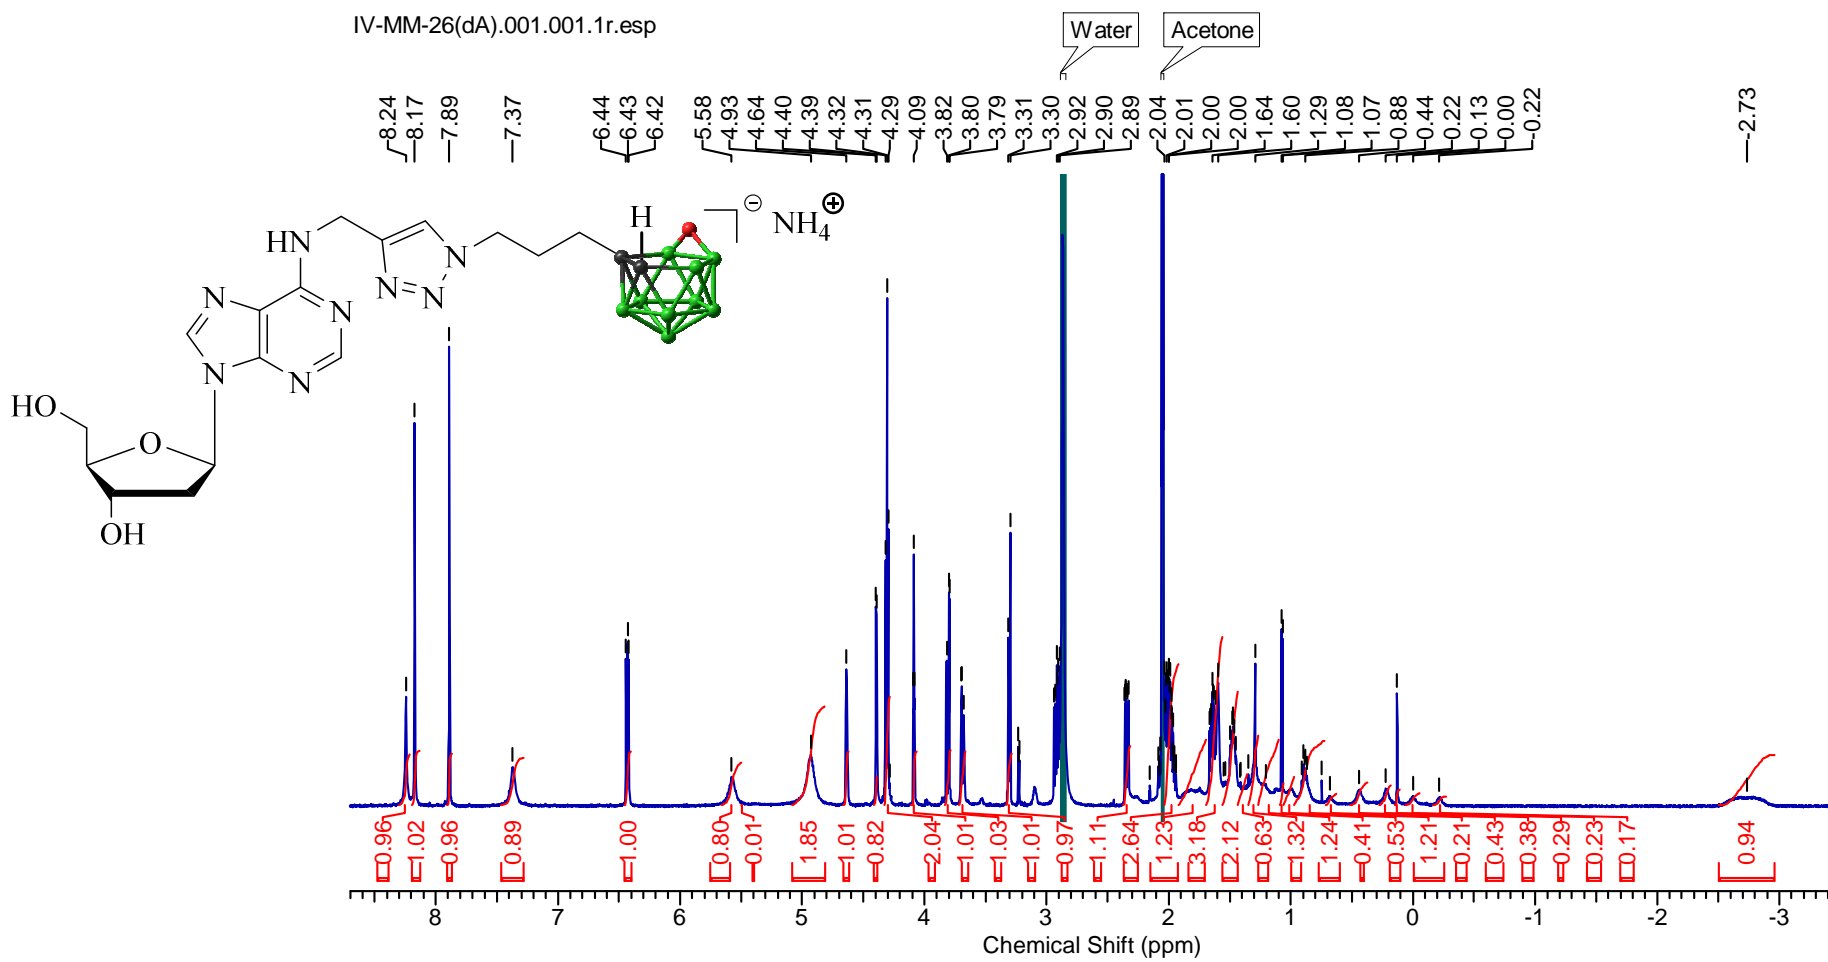

Figure S113.  $^1\text{H}$  NMR spectrum of compound 35.

SPEC: ay3601bm\_b 11-Jan-13 REG : 00:16.9 #9  
Samp: dA-mido Start : 16:11:32 10  
Comm: LSI, Cs+ 13 keV, gly  
Mode: FAB -VE - +LMR BSCAN (EXP) UP LR NRM Study : MS CBMIM PAN Lodz  
Oper: ed Client: IBM PAN A.Olejnicza Inlet :  
Base: 182.9 Inten : 63206 Masses: 100 > 1117  
Norm: 182.9 RIC : 719303 #peaks: 467  
Peak: 1000.00 mmu  
Data: +1>10

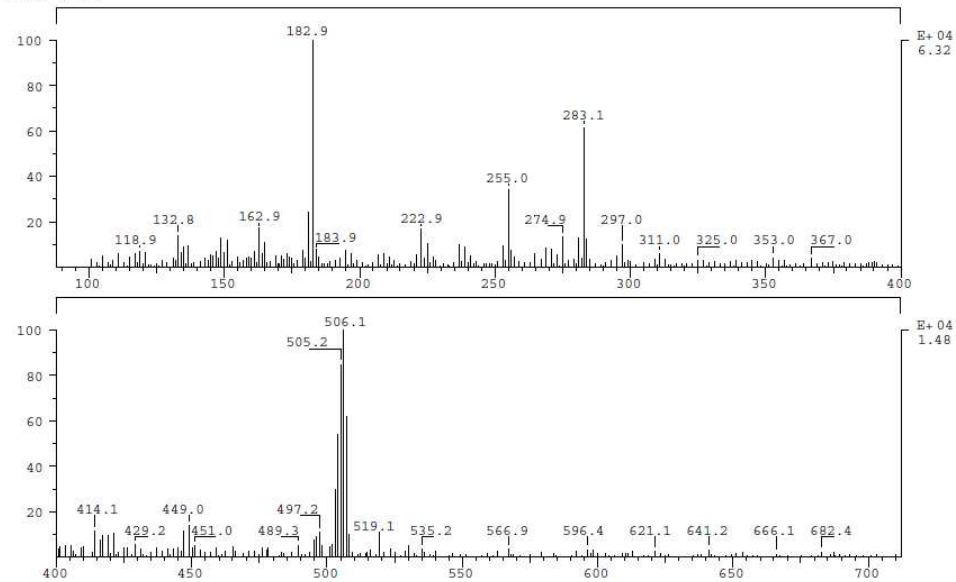

**Figure S114.** MS-FAB spectrum of compound **35**.

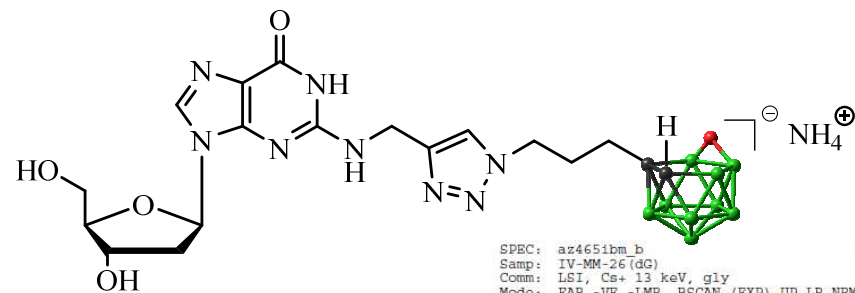

SPEC: az4651bm\_b 23-Dec-13 REG : 00:16.9 #9  
 Samp: IV-MM-26(dG) Start : 09:43:28 10  
 Comm: LSI, Cs+ 13 keV, gly  
 Mode: FAB -VE -LMR BSCAN (EXP) UP LR NRM Study : MS CBMIM PAN Lodz  
 Oper: ew Client: IBM A.Olejniczak Inlet :  
 Base: 265.3 Inten : 765038 Masses: 100 > 1127  
 Norm: 265.3 RIC : 16512061 #peaks: 1000  
 Peak: 1000.00 mmu  
 Data: +1>10

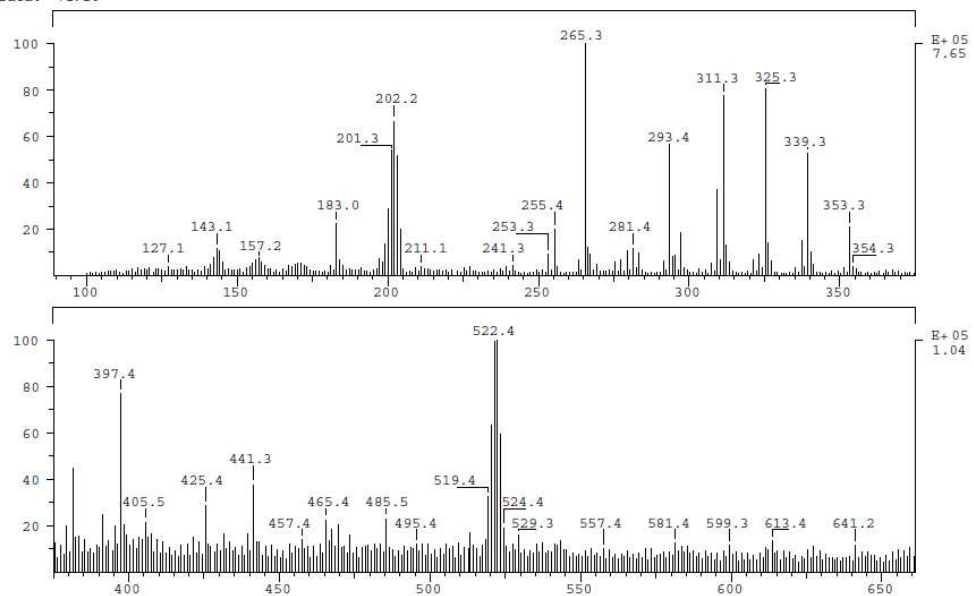

**Figure S115.** MS-FAB spectrum of compound **36**.

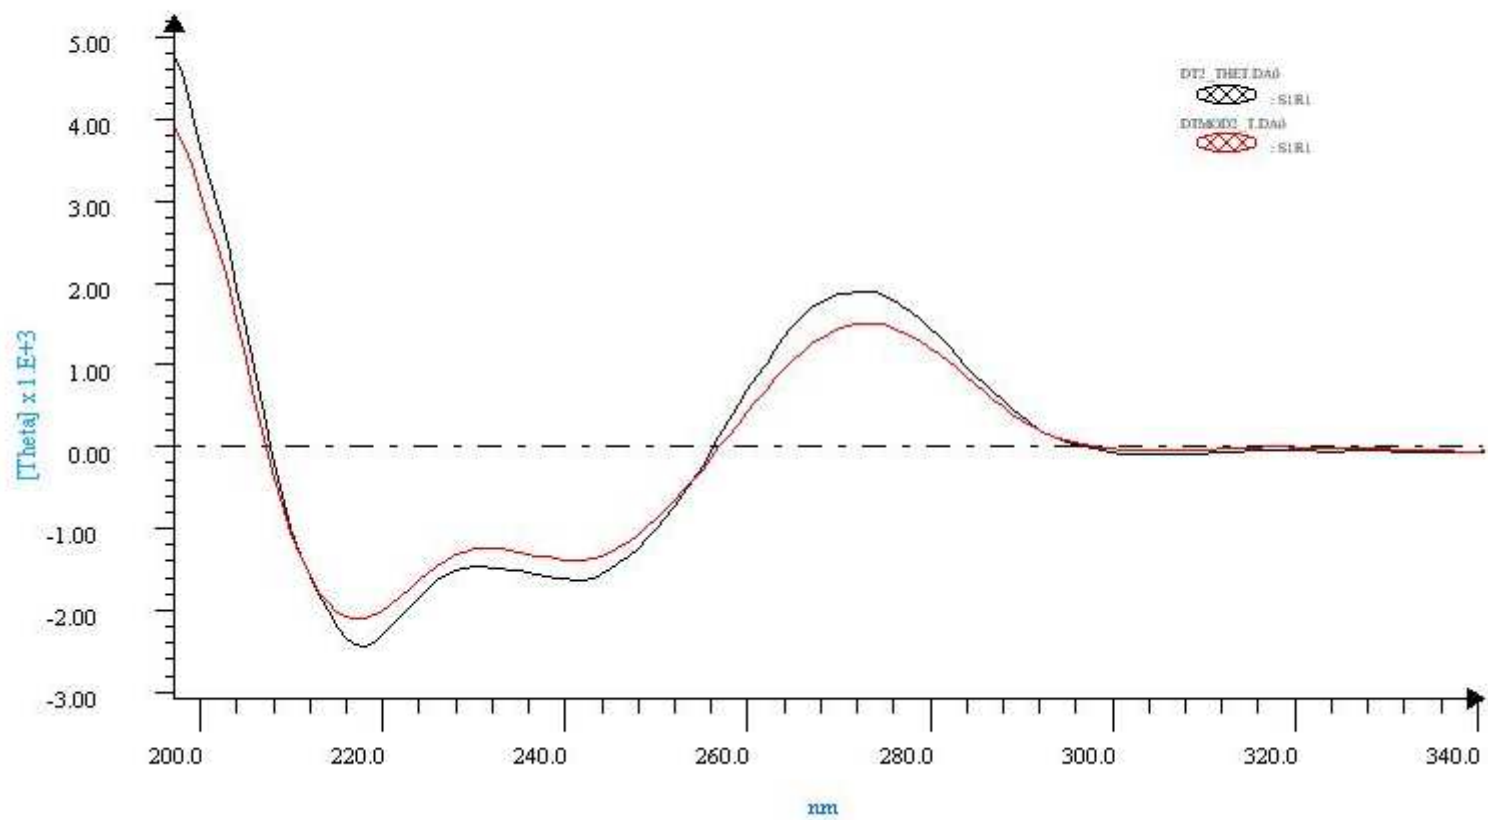

*Figure S116.* CD spectra of compounds **20** (red) and thymidine (black).



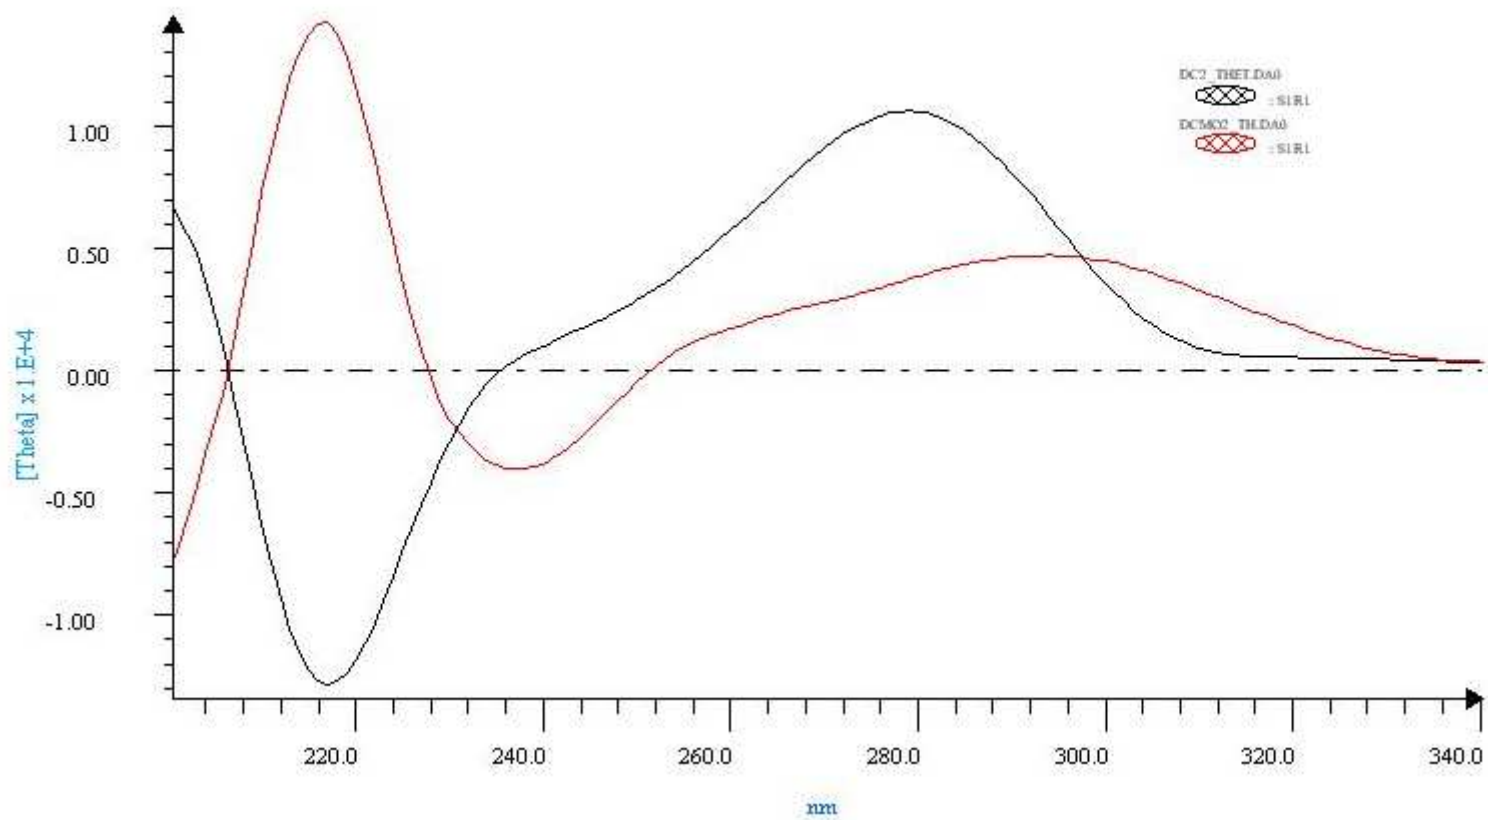

*Figure S117.* CD spectra of compounds **22** (red) and 2'-deoxycytidine (black).

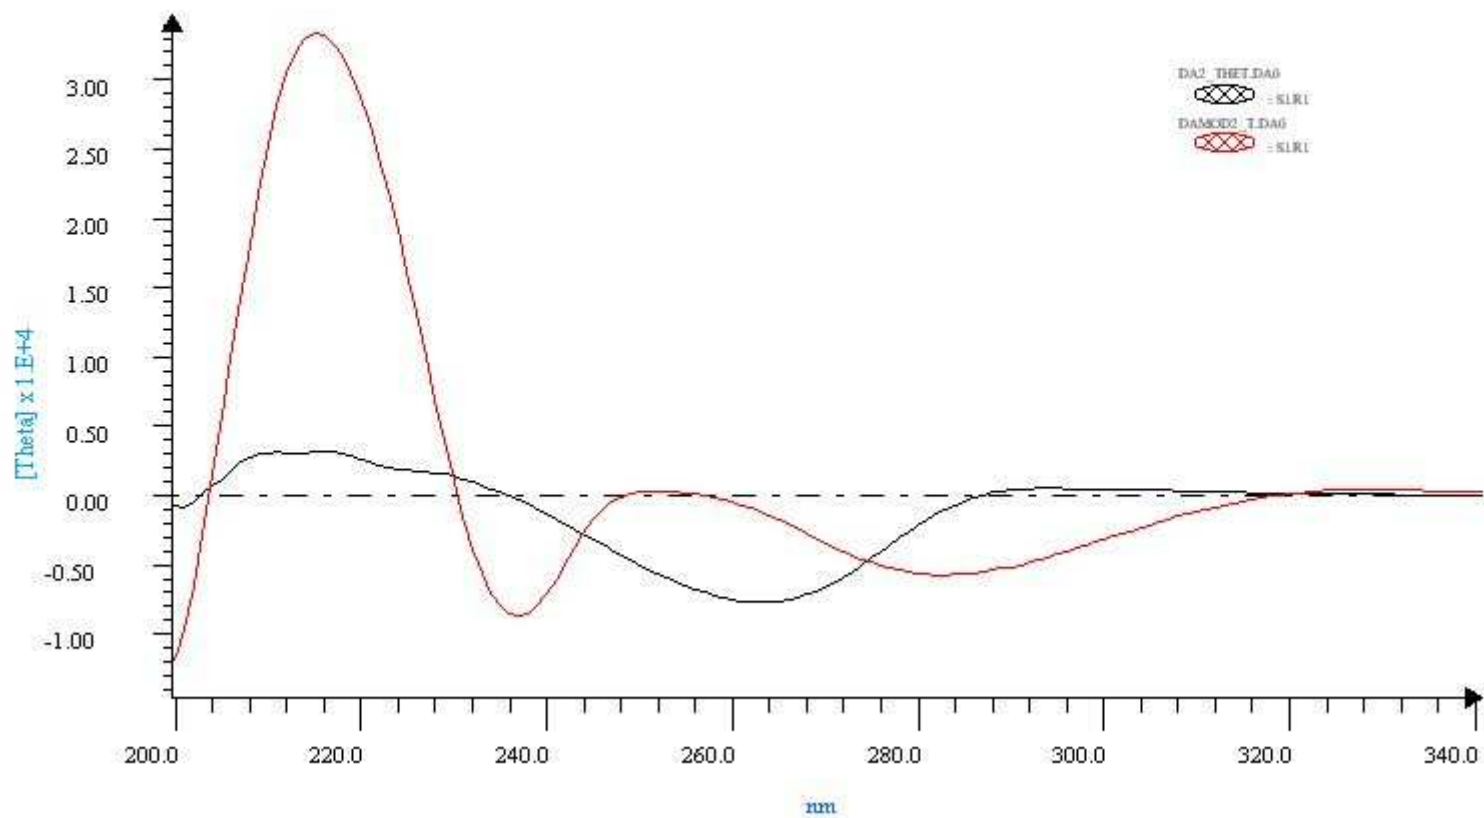

**Figure S118.** CD spectra of compounds **24** (red) and 2'-deoxyadenosine (black).

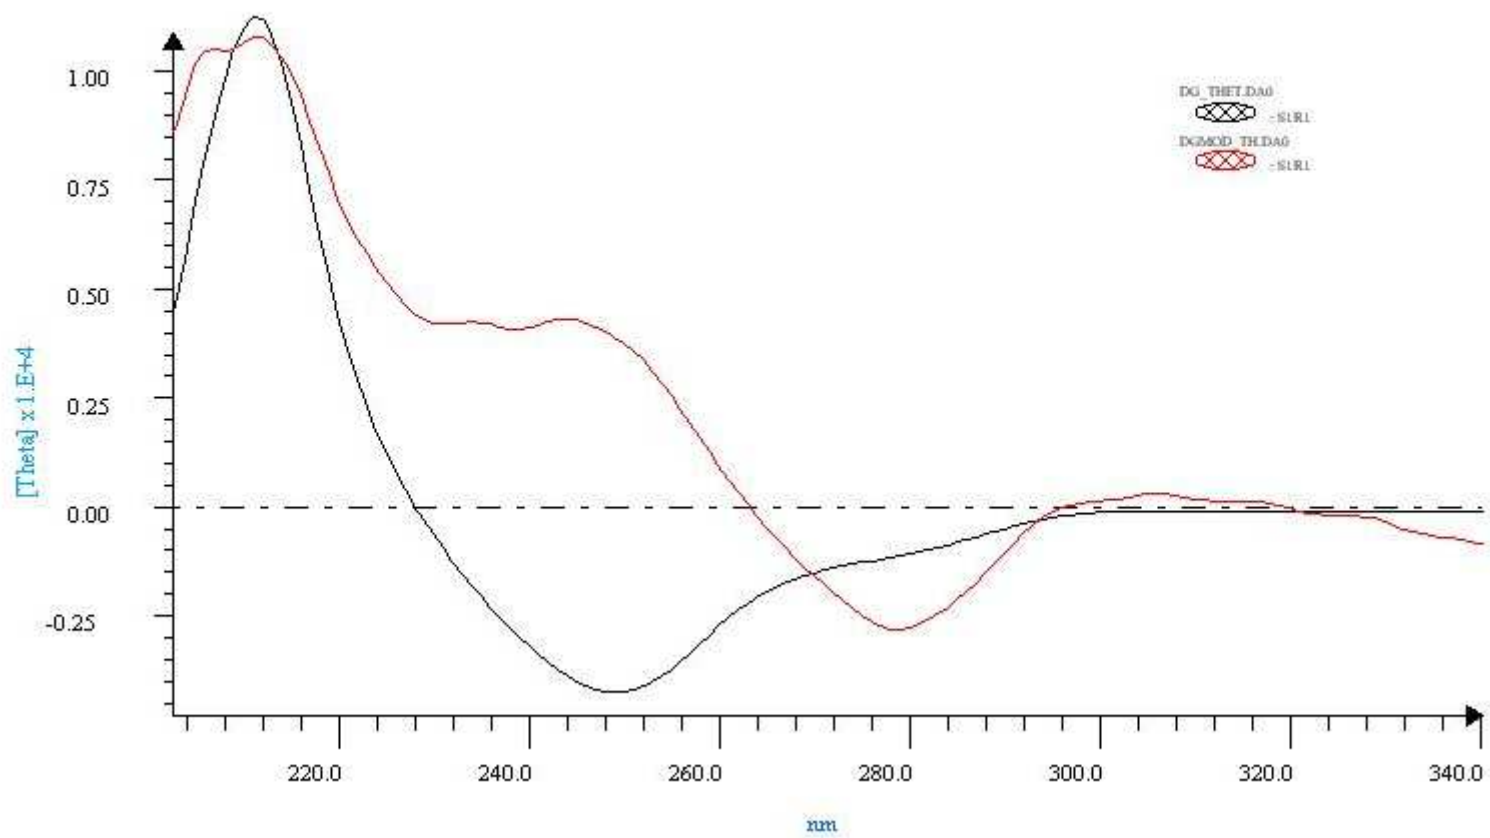

**Figure S119.** CD spectra of compounds **27** (red) and 2'-deoxyguanosine (black).

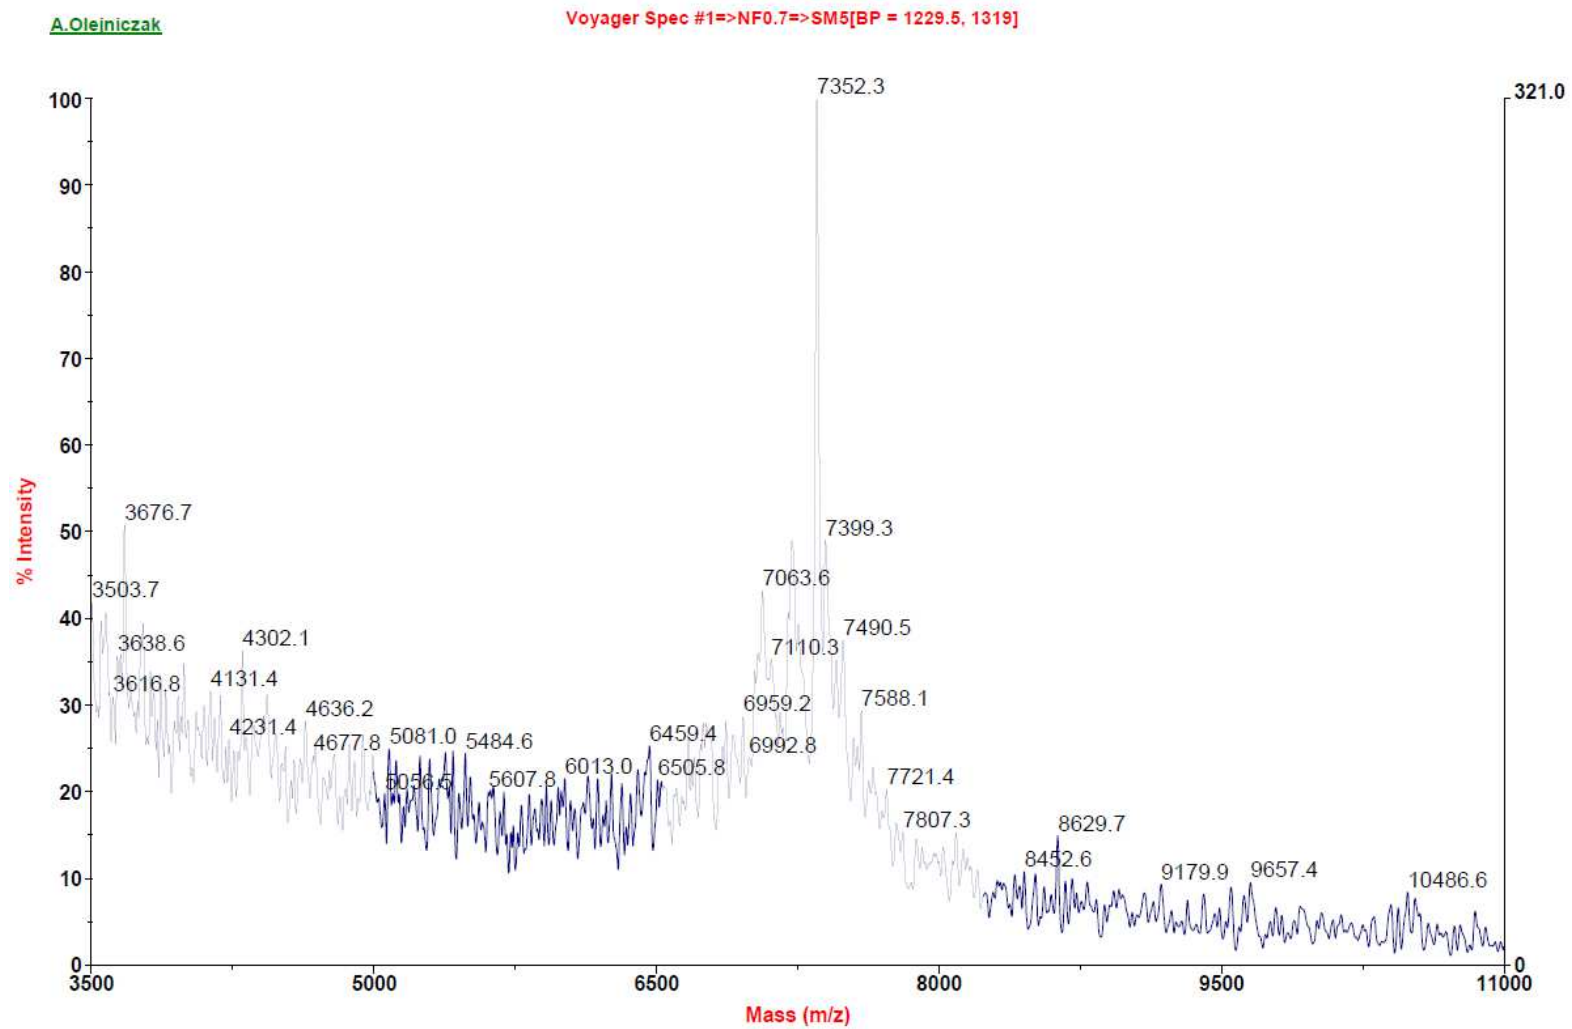

A.Olejniczak, XXXXI-AO-55, 0.01 OD (ACN/H<sub>2</sub>O 1:1), IE, [HPA, 3-hydroxypicolinic acid, 50 mg/mL in 50% ACN/H<sub>2</sub>O / AC, ammonium citrate dibasic, 50 mg/mL in H<sub>2</sub>O]  
 E:\...fg330011.dat  
 Acquired: 15:16:00, October 11, 2013

**Figure S120.** MALDI-TOF spectrum of oligonucleotide **38**.

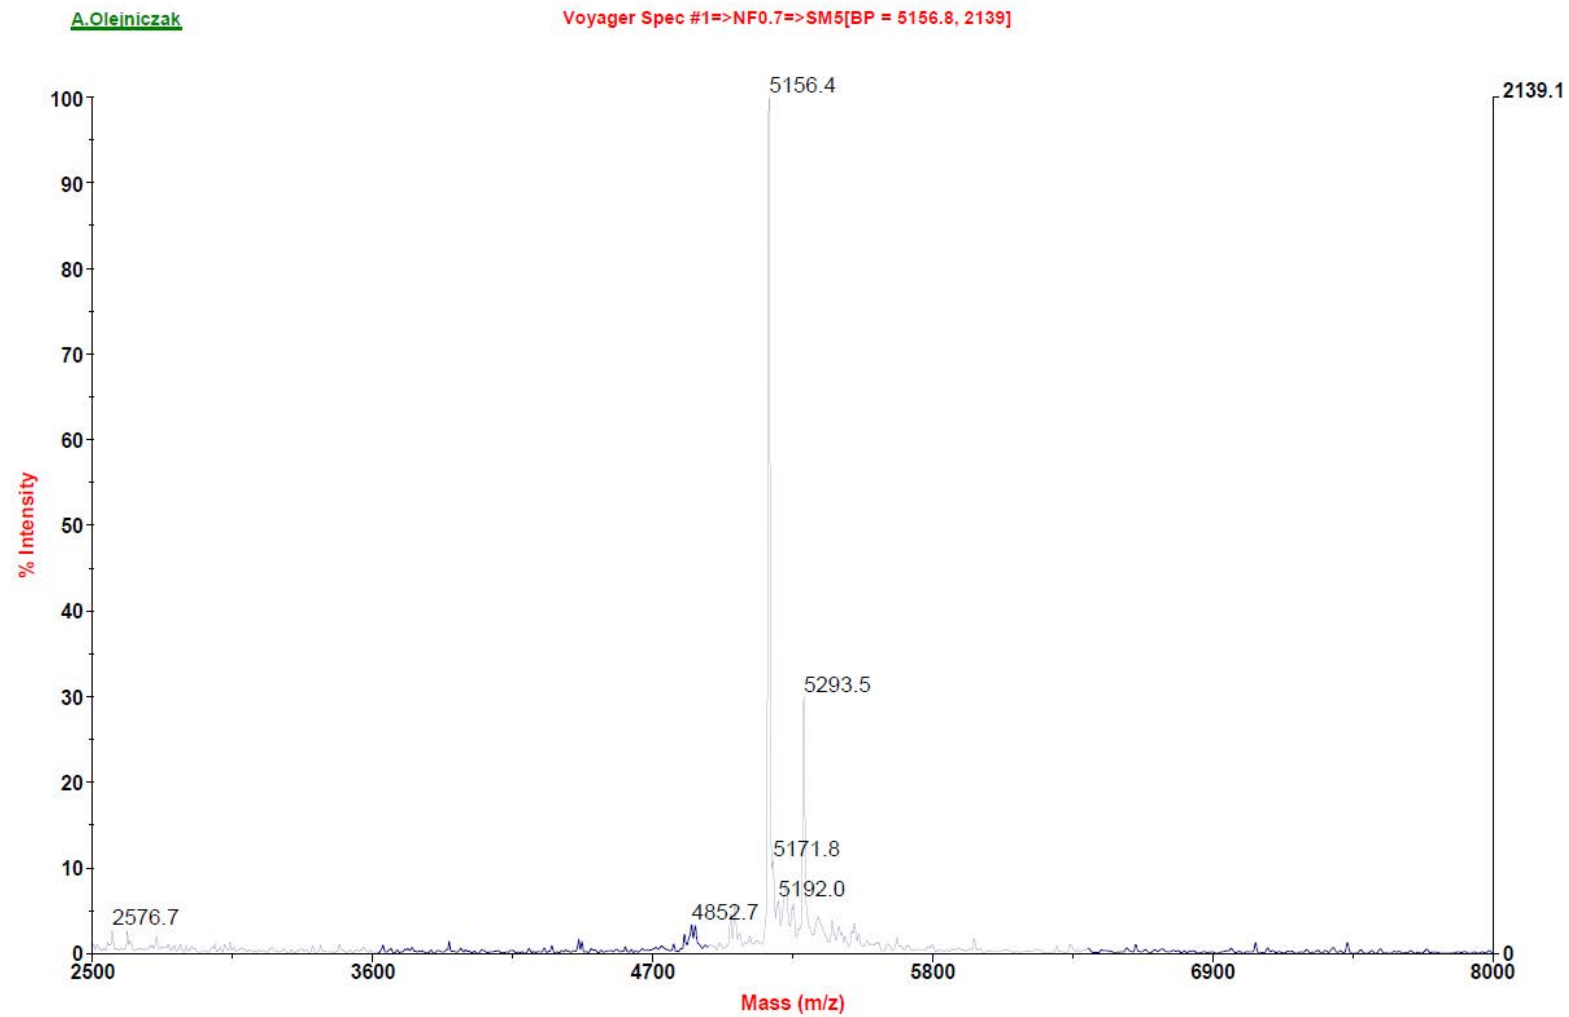

A.Olejniczak, XXXXI-AO-36, 0,01 OD (ACN/H2O 1:1), [HPA, 3-hydroxypicolinic acid, 50 mg/mL in 50% ACN/H2O / AC, ammonium citrate dibasic, 50 mg/mL in H2O - 8:1 (v/v)]  
E:\...ff910001.dat  
Acquired: 12:21:00, October 02, 2013

**Figure S121.** MALDI-TOF spectrum of oligonucleotide **39**.

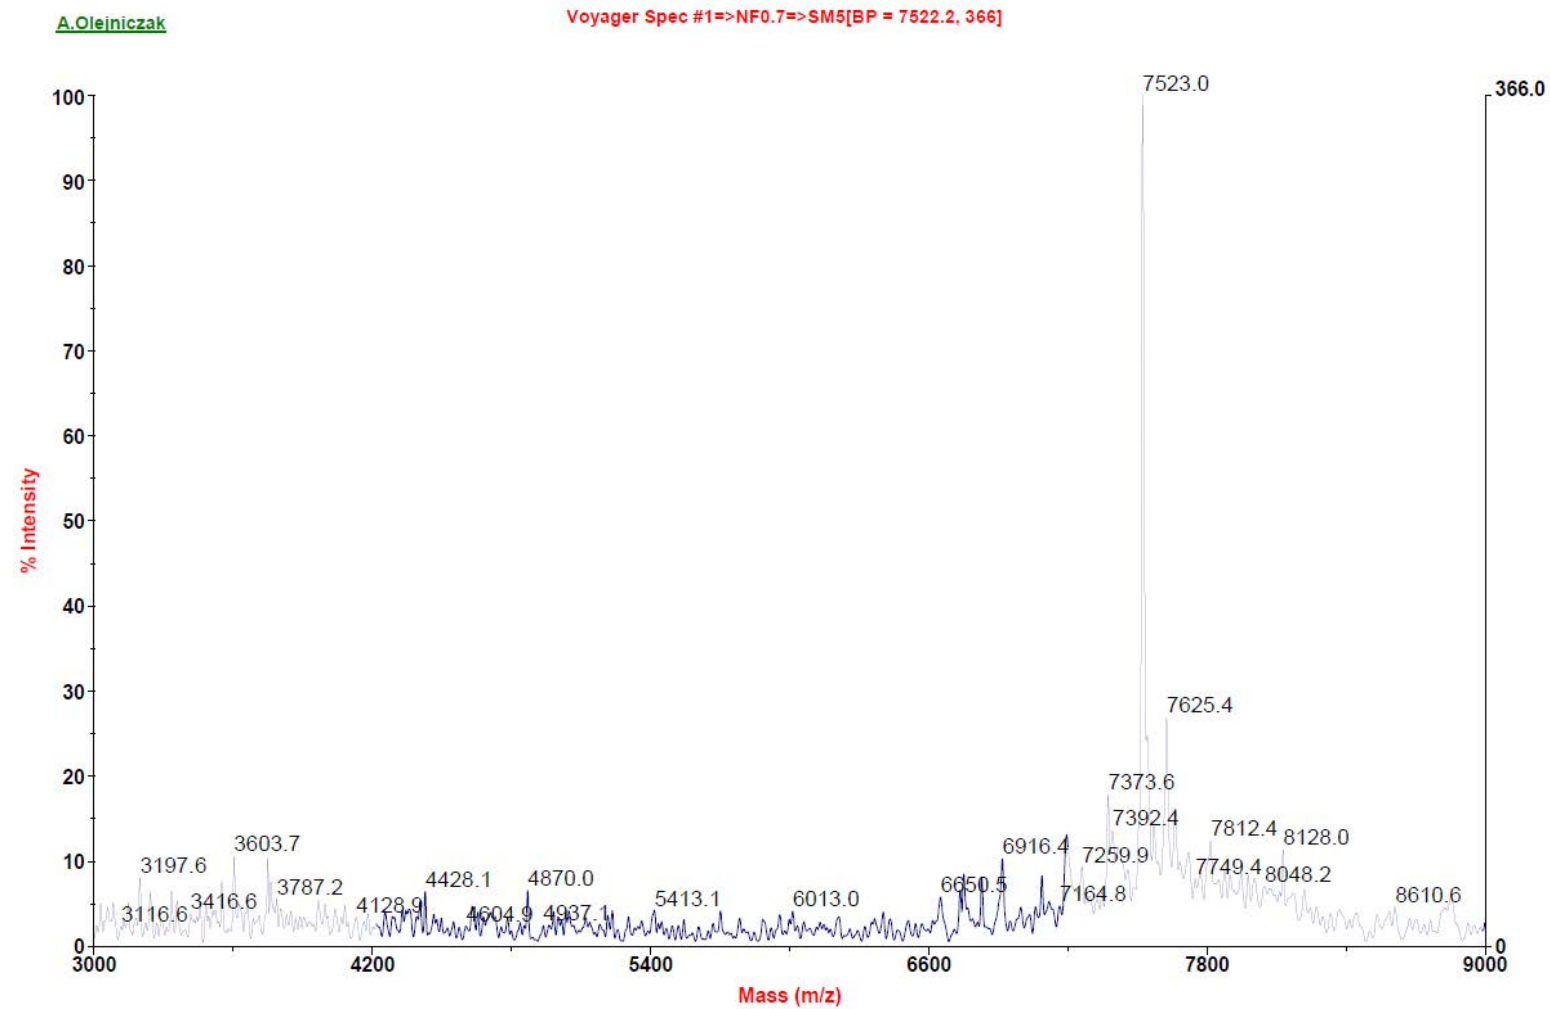

A.Olejniczak, XXXXI-AO-95, 0,01 OD (ACN/H2O 1:1),[HPA, 3-hydroxypicolinic acid, 50 mg/mL in 50% ACN/H2O / AC, ammonium citrate dibasic, 50 mg/mL in H2O - 8:1 (v/v)]  
 E:\...fh850001.dat  
 Acquired: 13:53:00, December 18, 2013

**Figure S122.** MALDI-TOF spectrum of oligonucleotide **40**.

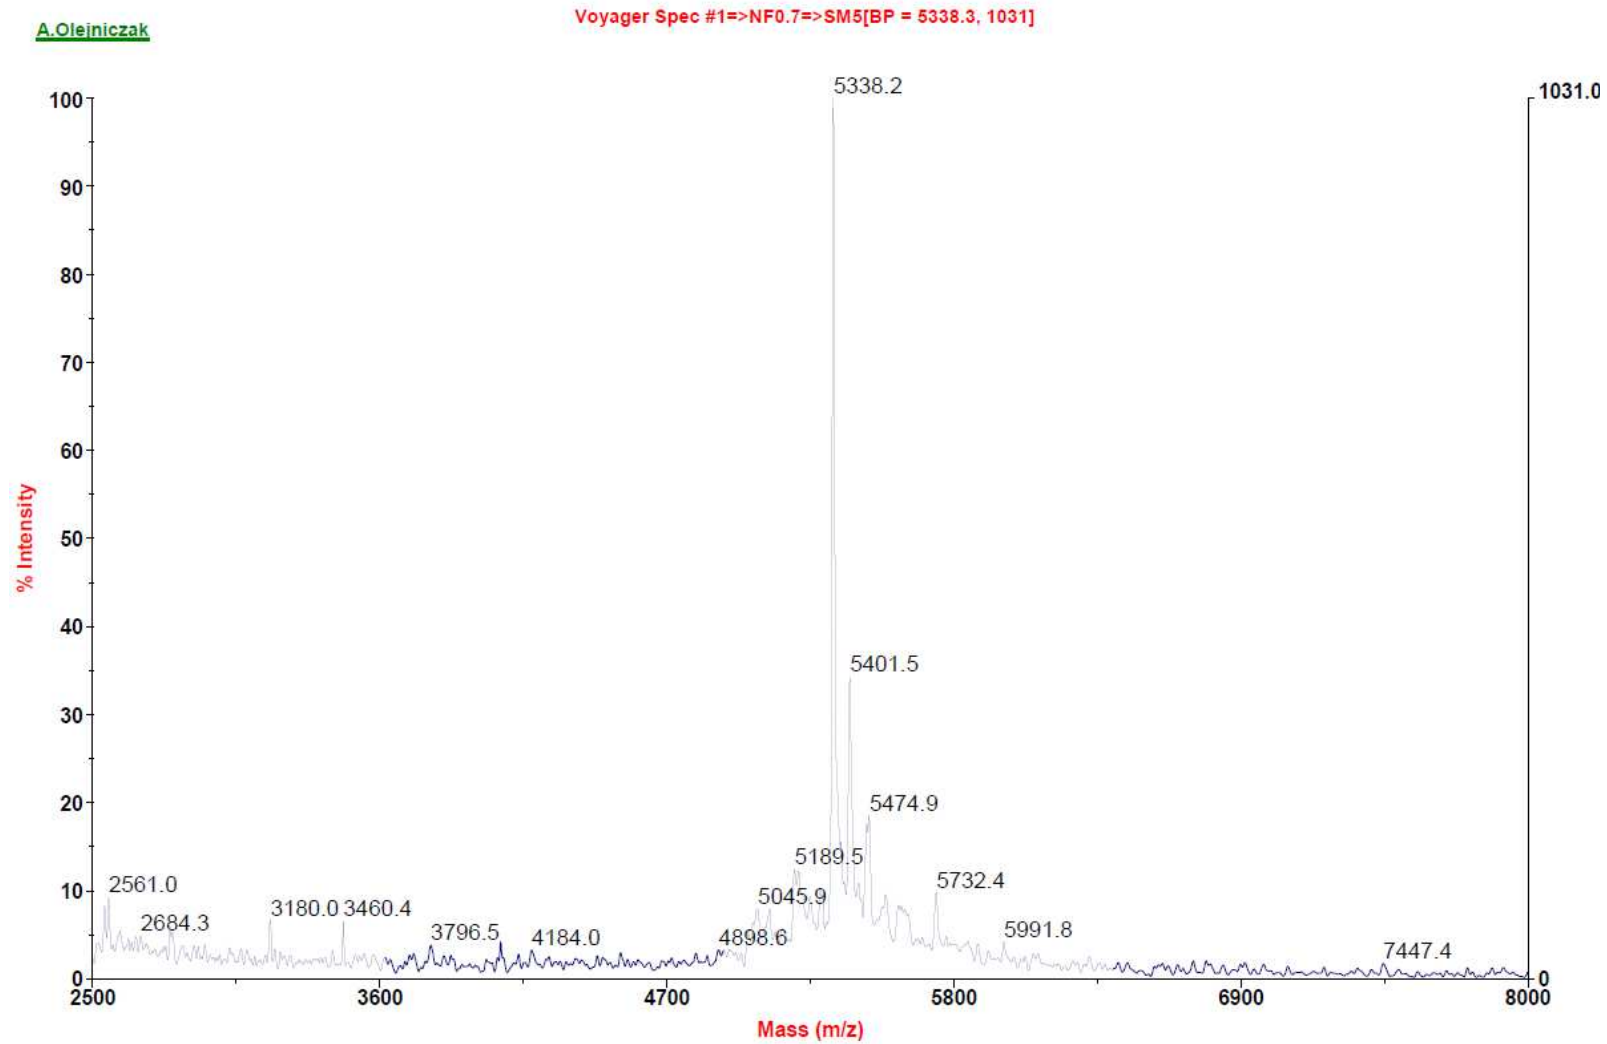

A.Olejniczak, XXXXI-AO-77, 0,01 OD (ACN/H<sub>2</sub>O 1:1), [HPA, 3-hydroxypicolinic acid, 50 mg/mL in 50% ACN/H<sub>2</sub>O / AC, ammonium citrate dibasic, 50 mg/mL in H<sub>2</sub>O - 8:1 (v/v)]  
E:\...fg640004.dat  
Acquired: 13:16:00, November 05, 2013

**Figure S123.** MALDI-TOF spectrum of oligonucleotide **41**.
